# Supplementary material for: Comprehensive Molecular Characterization and Identification of Prognostic Signature in Stomach Adenocarcinoma on The Basis of Energy-Metabolism-Related Genes
Source: Research Square preprint supplement (doi:10.21203/rs.3.rs-138125/v1), 2021-01-14
Supplement: Supplementary file 1 [file e2f05d46d1c16d058ebab4ae.pdf]

# Enrichment plot KEGG terms

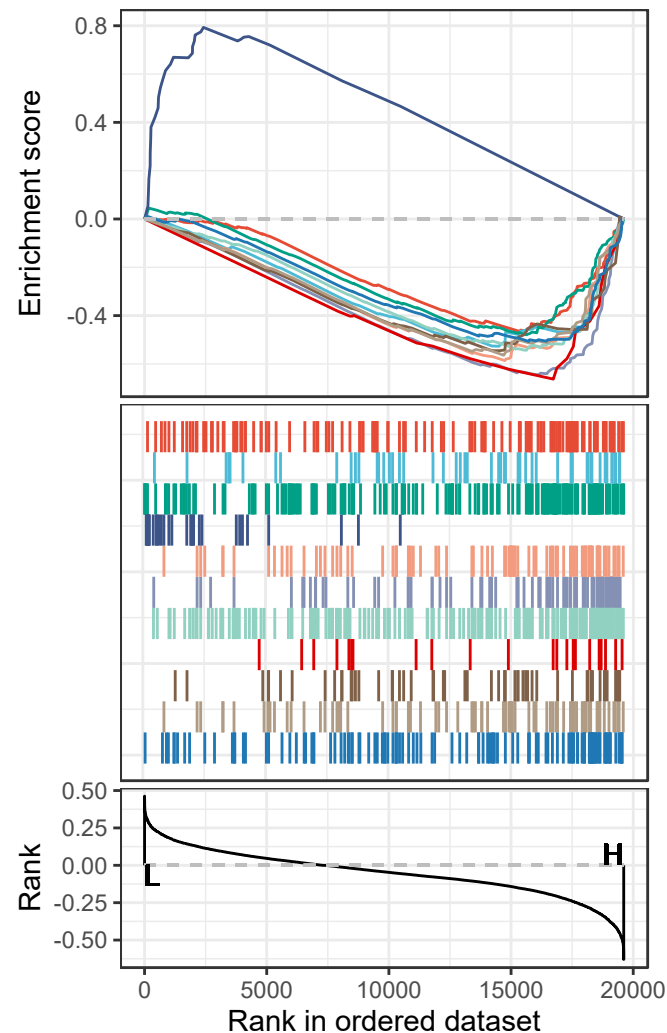

## Term

- ECM\_RECEPTOR\_INTERACTION  
ES=-0.66,NES=-2.1,P=0,FDR=0.011
- DILATED\_CARDIOMYOPATHY  
ES=-0.6,NES=-2,P=0,FDR=0.016
- FOCAL\_ADHESION  
ES=-0.55,NES=-2,P=0,FDR=0.02
- HYPERTROPHIC\_CARDIOMYOPATHY\_HCM  
ES=-0.57,NES=-2,P=0,FDR=0.016
- HEDGEHOG\_SIGNALING\_PATHWAY  
ES=-0.56,NES=-2,P=0,FDR=0.021
- GLYCOSAMINOGLYCAN\_BIOSYNTHESIS\_CHONDROITIN\_SULFATE  
ES=-0.72,NES=-1.9,P=0,FDR=0.02
- CALCIUM\_SIGNALING\_PATHWAY  
ES=-0.49,NES=-1.9,P=0,FDR=0.045
- BASAL\_CELL\_CARCINOMA  
ES=-0.54,NES=-1.9,P=0,FDR=0.047
- VASCULAR\_SMOOTH\_MUSCLE\_CONTRACTION  
ES=-0.52,NES=-1.9,P=0.0056,FDR=0.042
- AXON\_GUIDANCE  
ES=-0.47,NES=-1.8,P=0.0019,FDR=0.049
- CITRATE\_CYCLE\_TCA\_CYCLE  
ES=0.79,NES=2.1,P=0.0019,FDR=0.035
