# Supplementary material for: Comprehensive Molecular Characterization and Identification of Prognostic Signature in Stomach Adenocarcinoma on The Basis of Energy-Metabolism-Related Genes
Source: Research Square preprint supplement (doi:10.21203/rs.3.rs-138125/v1), 2021-01-14
Supplement: Supplementary file 4 [file 64ed1269c3676e0c035e02e2.xlsx]

## Sheet: S9_Table
Supplementary Table 4. KEGG pathways significantly involved in the yellow and brown module
ID	Description	GeneRatio	BgRatio	pvalue	p.adjust	qvalue	geneID	Count	rep("yellow", nrow(KEGG.result1))
hsa04510	Focal adhesion	34/267	199/8011	1.46356e-15	3.39545e-13	2.78846e-13	COL6A2/PGF/LAMA4/IGF1/COL6A3/FLT4/THBS4/FN1/VWF/COL6A1/COL4A4/VEGFB/PDGFRA/COL4A1/KDR/PDGFRB/ITGAV/PDGFD/HGF/PDGFB/LAMA2/FLT1/COL1A2/PDGFC/LAMB1/ITGB5/MAPK10/THBS3/COL1A1/VEGFC/TNXB/COL4A2/ITGA11/THBS2	34	yellow
hsa04512	ECM-receptor interaction	23/267	88/8011	5.17751e-15	6.00591e-13	4.93226e-13	COL6A2/LAMA4/COL6A3/THBS4/FN1/VWF/COL6A1/COL4A4/COL4A1/CD36/ITGAV/LAMA2/FREM1/COL1A2/HSPG2/LAMB1/ITGB5/THBS3/COL1A1/TNXB/COL4A2/ITGA11/THBS2	23	yellow
hsa04151	PI3K-Akt signaling pathway	43/267	354/8011	6.62961e-14	5.1269e-12	4.21038e-12	LPAR1/COL6A2/PGF/LAMA4/IGF1/COL6A3/FLT4/THBS4/FN1/VWF/NGF/NOS3/IL3RA/COL6A1/COL4A4/VEGFB/FGF7/PDGFRA/COL4A1/KDR/PDGFRB/ITGAV/PDGFD/F2R/HGF/PDGFB/LAMA2/FLT1/COL1A2/PDGFC/NGFR/LAMB1/ITGB5/THBS3/COL1A1/TEK/VEGFC/GNG11/TNXB/COL4A2/ITGA11/GNB4/THBS2	43	yellow
hsa04974	Protein digestion and absorption	22/267	95/8011	3.12975e-13	1.81525e-11	1.49075e-11	ELN/COL6A2/COL18A1/COL14A1/COL6A3/COL15A1/COL6A1/COL11A1/COL4A4/COL5A2/COL3A1/COL4A1/COL5A3/COL12A1/PRCP/COL1A2/COL5A1/COL10A1/COL1A1/CPA3/COL4A2/COL13A1	22	yellow
hsa04933	AGE-RAGE signaling pathway in diabetic complications	17/267	100/8011	2.57588e-08	1.19521e-06	9.81545e-07	FN1/NOS3/COL4A4/COL3A1/VEGFB/COL4A1/MAPK11/SELE/COL1A2/TGFBR2/THBD/MAPK10/TGFB3/COL1A1/VEGFC/COL4A2/NOX4	17	yellow
hsa04610	Complement and coagulation cascades	15/267	85/8011	1.04145e-07	4.02694e-06	3.30706e-06	F2RL2/F2RL3/C3/CFH/SERPING1/PLAT/CFD/VWF/BDKRB1/BDKRB2/F2R/C1R/THBD/A2M/C1S	15	yellow
hsa04015	Rap1 signaling pathway	23/267	210/8011	4.4114e-07	1.3924e-05	1.14348e-05	F2RL3/LPAR1/ADCY4/PGF/IGF1/FLT4/NGF/VEGFB/FGF7/PDGFRA/KDR/PDGFRB/PDGFD/F2R/HGF/PDGFB/MAPK11/FLT1/PDGFC/NGFR/GNAI2/TEK/VEGFC	23	yellow
hsa04010	MAPK signaling pathway	28/267	295/8011	4.80378e-07	1.3924e-05	1.14348e-05	RPS6KA2/PGF/RASGRF2/IGF1/MAP3K3/FLT4/NGF/VEGFB/FGF7/DUSP1/PDGFRA/KDR/PDGFRB/PDGFD/HGF/PDGFB/MAPK11/IL1R1/FLT1/PDGFC/TGFBR2/NGFR/MAPK10/TGFB3/MAP3K12/RASGRP4/TEK/VEGFC	28	yellow
hsa05144	Malaria	11/267	50/8011	5.40154e-07	1.3924e-05	1.14348e-05	LRP1/THBS4/CD36/PECAM1/HGF/SELE/ACKR1/TGFB3/THBS3/THBS2/SELP	11	yellow
hsa04926	Relaxin signaling pathway	17/267	129/8011	1.14939e-06	2.66659e-05	2.18989e-05	ADCY4/EDNRB/NOS3/COL4A4/COL3A1/VEGFB/COL4A1/MAPK11/COL1A2/TGFBR2/MAPK10/COL1A1/GNAI2/VEGFC/GNG11/COL4A2/GNB4	17	yellow
hsa05165	Human papillomavirus infection	29/267	330/8011	1.47434e-06	3.10952e-05	2.55365e-05	COL6A2/LAMA4/WNT2B/COL6A3/THBS4/FN1/WNT2/FZD8/VWF/COL6A1/COL4A4/NOTCH3/COL4A1/PDGFRB/ITGAV/LAMA2/HEYL/FZD1/COL1A2/NOTCH4/LAMB1/ITGB5/FZD4/THBS3/COL1A1/TNXB/COL4A2/ITGA11/THBS2	29	yellow
hsa04014	Ras signaling pathway	23/267	232/8011	2.54833e-06	4.92678e-05	4.04604e-05	PGF/RASGRF2/IGF1/FLT4/NGF/VEGFB/FGF7/PDGFRA/KDR/PDGFRB/PDGFD/HGF/PDGFB/FLT1/PDGFC/NGFR/MAPK10/RASGRP4/TEK/VEGFC/GNG11/RASA3/GNB4	23	yellow
hsa04072	Phospholipase D signaling pathway	17/267	148/8011	7.78724e-06	0.000138972	0.000114129	LPAR1/ADCY4/PLPP3/MS4A2/AVPR1A/PDGFRA/PDGFRB/PDGFD/F2R/FCER1A/PDGFB/AGPAT4/PTGFR/PDGFC/CYTH3/PLPP1/SPHK1	17	yellow
hsa04340	Hedgehog signaling pathway	9/267	50/8011	3.34932e-05	0.000555031	0.00045581	EVC2/EVC/GLI2/SUFU/GAS1/GLI1/HHIP/DHH/BOC	9	yellow
hsa05205	Proteoglycans in cancer	19/267	204/8011	4.68272e-05	0.00072426	0.000594787	WNT2B/IGF1/FN1/WNT2/FZD8/KDR/ITGAV/LUM/HGF/MAPK11/TIMP3/FZD1/COL1A2/HSPG2/DCN/ITGB5/FZD4/COL1A1/TWIST1	19	yellow
hsa04020	Calcium signaling pathway	18/267	193/8011	7.29845e-05	0.00105827	0.000869091	CAMK1D/ADCY4/EDNRB/PDE1A/AVPR1A/BDKRB1/NOS3/BDKRB2/PDGFRA/PDGFRB/F2R/PTGER1/PTGFR/HTR2A/EDNRA/SPHK1/TBXA2R/HTR2B	18	yellow
hsa05146	Amoebiasis	12/267	102/8011	0.000136923	0.0018686	0.00153456	LAMA4/FN1/COL4A4/COL3A1/COL4A1/LAMA2/IL1R1/COL1A2/LAMB1/TGFB3/COL1A1/COL4A2	12	yellow
hsa04540	Gap junction	11/267	88/8011	0.000150563	0.00194059	0.00159368	LPAR1/ADCY4/PDGFRA/PDGFRB/PDGFD/GUCY1A2/PDGFB/PDGFC/HTR2A/GNAI2/HTR2B	11	yellow
hsa05217	Basal cell carcinoma	9/267	63/8011	0.000216657	0.00264549	0.00217257	WNT2B/GLI2/SUFU/WNT2/FZD8/GLI1/HHIP/FZD1/FZD4	9	yellow
hsa04611	Platelet activation	13/267	124/8011	0.000235339	0.00272994	0.00224192	F2RL3/ADCY4/VWF/NOS3/COL3A1/F2R/GUCY1A2/MAPK11/COL1A2/COL1A1/GNAI2/PTGIR/TBXA2R	13	yellow
hsa04514	Cell adhesion molecules (CAMs)	14/267	147/8011	0.000373669	0.00412815	0.00339018	NLGN3/PTPRM/NTNG2/CDH5/CLDN5/CD276/CD34/ITGAV/PECAM1/SELE/ESAM/NRXN2/VCAN/SELP	14	yellow
hsa00532	Glycosaminoglycan biosynthesis - chondroitin sulfate / dermatan sulfate	5/267	20/8011	0.000406952	0.00429149	0.00352432	CHST7/CHSY3/CSGALNACT2/DSE/XYLT1	5	yellow
hsa05418	Fluid shear stress and atherosclerosis	13/267	139/8011	0.000715938	0.00722164	0.00593065	CDH5/PLAT/NOS3/DUSP1/KDR/ITGAV/PECAM1/PDGFB/MAPK11/SELE/IL1R1/THBD/MAPK10	13	yellow
hsa04022	cGMP-PKG signaling pathway	35/408	167/8011	3.60397e-13	9.55051e-11	7.01825e-11	GUCY1A1/PDE5A/PPP1R12A/ITPR1/ATP2B4/GNAI1/SLC8A2/ATP1A2/NFATC4/SRF/PLCB1/MYL9/KCNMB1/SLC25A4/NPR2/PDE3A/MRVI1/ADCY5/ADRB2/ATP1B2/AKT3/MYLK/CALM1/KCNMA1/SLC8A1/PRKG1/AGTR1/RGS2/PPP3CB/GUCY1B1/MEF2A/PDE2A/CACNA1C/PLN/ADCY9	35	brown
hsa05414	Dilated cardiomyopathy (DCM)	26/408	96/8011	8.34979e-13	1.09943e-10	8.07922e-11	PRKACB/SGCB/CACNA2D1/SLC8A2/TPM1/CACNB2/DES/ADCY5/ITGA7/CACNA2D3/DMD/SLC8A1/SGCD/RYR2/TGFB2/SGCA/ITGA9/ITGA5/ITGA8/CACNA1C/ITGA1/PLN/TPM2/ACTB/ITGB3/ADCY9	26	brown
hsa05410	Hypertrophic cardiomyopathy (HCM)	25/408	90/8011	1.24464e-12	1.09943e-10	8.07922e-11	SGCB/CACNA2D1/SLC8A2/TPM1/CACNB2/DES/PRKAB2/ITGA7/CACNA2D3/DMD/SLC8A1/SGCD/RYR2/TGFB2/PRKAG2/PRKAA2/SGCA/ITGA9/ITGA5/ITGA8/CACNA1C/ITGA1/TPM2/ACTB/ITGB3	25	brown
hsa04921	Oxytocin signaling pathway	32/408	153/8011	4.10466e-12	2.71934e-10	1.99832e-10	GUCY1A1/PRKACB/PPP1R12A/ITPR1/GNAO1/CACNA2D1/GNAI1/PLA2G4C/NFATC4/MYL6/PLCB1/CACNB2/MYL9/NPR2/ADCY5/PRKAB2/CACNA2D3/PPP1R12C/MYLK/CALM1/JUN/RYR2/PRKAG2/PRKAA2/CAMK2G/RGS2/PPP3CB/GUCY1B1/PPP1R12B/CACNA1C/ACTB/ADCY9	32	brown
hsa04270	Vascular smooth muscle contraction	28/408	132/8011	6.67233e-11	3.53634e-09	2.5987e-09	GUCY1A1/PRKACB/PPP1R12A/ITPR1/PLA2G4C/MYL6/PLCB1/MYL9/KCNMB1/NPR2/PPP1R14A/MRVI1/ACTA2/MYH11/ADCY5/PPP1R12C/RAMP1/MYLK/ACTG2/CALM1/KCNMA1/PRKG1/AGTR1/GUCY1B1/CALD1/PPP1R12B/CACNA1C/ADCY9	28	brown
hsa05412	Arrhythmogenic right ventricular cardiomyopathy (ARVC)	21/408	77/8011	1.20382e-10	5.31688e-09	3.90714e-09	SGCB/TCF7L1/CACNA2D1/SLC8A2/CACNB2/DES/ITGA7/CACNA2D3/DMD/SLC8A1/SGCD/RYR2/SGCA/ITGA9/ITGA5/ITGA8/CACNA1C/ITGA1/GJA1/ACTB/ITGB3	21	brown
hsa04261	Adrenergic signaling in cardiomyocytes	28/408	149/8011	1.29349e-09	4.89677e-08	3.59842e-08	PRKACB/ATP2B4/CACNA2D1/GNAI1/SLC8A2/ATP1A2/PLCB1/TPM1/CACNB2/ADCY5/ADRB2/ATP1B2/AKT3/CACNA2D3/PPP2R3A/PPP1R1A/CALM1/SLC8A1/RPS6KA5/RYR2/PPP2R5B/CAMK2G/AGTR1/SCN7A/CACNA1C/PLN/TPM2/ADCY9	28	brown
hsa04510	Focal adhesion	32/408	199/8011	4.94612e-09	1.6384e-07	1.20399e-07	PPP1R12A/ZYX/MYL9/LAMB2/AKT3/ACTN1/RAP1A/TLN1/COL4A5/FLNC/ITGA7/PPP1R12C/ILK/MYLK/TNC/PIP5K1C/JUN/PIK3R1/COL4A6/SHC2/ITGA9/ITGA5/PARVA/CAV1/VCL/ITGA8/PPP1R12B/ITGA1/FLNA/ACTB/ITGB3/TNN	32	brown
hsa04371	Apelin signaling pathway	25/408	137/8011	1.8939e-08	5.57649e-07	4.09792e-07	PRKACB/ITPR1/GNAI1/SLC8A2/PLCB1/TGFBR1/HDAC4/ACTA2/ADCY5/PRKAB2/AKT3/GABARAPL1/GNB5/MRAS/MYLK/CALM1/SLC8A1/RYR2/GNG7/PRKAG2/PRKAA2/AGTR1/RRAS/MEF2A/ADCY9	25	brown
hsa04713	Circadian entrainment	20/408	97/8011	6.2568e-08	1.65805e-06	1.21843e-06	GUCY1A1/PRKACB/ITPR1/GNAO1/GNAI1/CACNA1H/PLCB1/ADCY5/PER1/GNB5/CALM1/RPS6KA5/RYR2/GNG7/PRKG1/CAMK2G/GUCY1B1/CACNA1C/PER3/ADCY9	20	brown
hsa04924	Renin secretion	16/408	69/8011	2.42619e-07	5.84492e-06	4.29517e-06	GUCY1A1/PRKACB/PDE1C/ITPR1/GNAI1/PLCB1/PDE3A/ADCY5/ADRB2/PDE1B/CALM1/KCNMA1/AGTR1/PPP3CB/GUCY1B1/CACNA1C	16	brown
hsa04020	Calcium signaling pathway	27/408	193/8011	1.44767e-06	3.19694e-05	2.34929e-05	PRKACB/PDE1C/PLCD4/ITPR1/ATP2B4/SLC8A2/CACNA1H/PLCB1/SLC25A4/ADRB2/TACR2/PTGER3/MYLK/PDE1B/GNAL/CASQ2/CALM1/SLC8A1/RYR2/CAMK2G/AGTR1/PPP3CB/PHKG1/CACNA1C/ITPKB/PLN/ADCY9	27	brown
hsa05032	Morphine addiction	17/408	91/8011	2.64565e-06	5.39306e-05	3.96312e-05	PRKACB/PDE1C/GNAO1/GNAI1/GRK4/PDE3A/ADCY5/ARRB1/PDE8B/GNB5/GABBR1/PDE1B/PDE4D/GNG7/PDE2A/PDE7B/ADCY9	17	brown
hsa04611	Platelet activation	20/408	124/8011	3.85414e-06	7.29533e-05	5.36102e-05	GUCY1A1/PRKACB/PPP1R12A/ITPR1/GNAI1/PLA2G4C/VAMP8/PLCB1/ADCY5/AKT3/RAP1A/TLN1/PTGS1/MYLK/PIK3R1/PRKG1/GUCY1B1/ACTB/ITGB3/ADCY9	20	brown
hsa04024	cAMP signaling pathway	28/408	216/8011	4.2735e-06	7.54985e-05	5.54805e-05	GLI3/PRKACB/PPP1R12A/ATP2B4/GNAI1/ATP1A2/MYL9/VIP/PDE3A/ADCY5/ADRB2/ATP1B2/AKT3/RAP1A/VIPR2/FXYD1/GABBR1/PTGER3/CALM1/PDE4D/JUN/RYR2/PIK3R1/CAMK2G/RRAS/CACNA1C/PLN/ADCY9	28	brown
hsa04810	Regulation of actin cytoskeleton	27/408	213/8011	9.69515e-06	0.000160576	0.000118	FGF10/CFL2/PPP1R12A/FGF1/MYL9/FGF2/ACTN1/ITGA7/PPP1R12C/MRAS/RDX/MYLK/GSN/PIP5K1C/FGFR1/PIK3R1/ITGA9/RRAS/ITGA5/VCL/ITGA8/PPP1R12B/ITGA1/WASF1/ACTB/ITGB3/ENAH	27	brown
hsa04360	Axon guidance	24/408	181/8011	1.42359e-05	0.000221912	0.000163074	EPHA3/CFL2/EPHA7/GNAI1/NFATC4/PLXNA4/MYL9/SEMA4C/NTN1/ABL1/SEMA6C/ILK/TRPC4/SEMA3C/DPYSL2/PIK3R1/CAMK2G/RRAS/PPP3CB/RGMA/TRPC1/ROBO1/LRRC4/ENAH	24	brown
hsa04925	Aldosterone synthesis and secretion	16/408	98/8011	3.07843e-05	0.000453214	0.000333047	PRKACB/ITPR1/ATP2B4/ATP1A2/CACNA1H/PLCB1/PRKD1/ADCY5/ATP1B2/KCNK3/CALM1/CAMK2G/AGTR1/PDE2A/CACNA1C/ADCY9	16	brown
hsa05205	Proteoglycans in cancer	25/408	204/8011	3.70805e-05	0.000517176	0.00038005	PRKACB/PPP1R12A/ITPR1/SDC2/FGF2/HSPB2/AKT3/FLNC/PPP1R12C/MRAS/RDX/WNT9A/FGFR1/TGFB2/GAB1/ANK2/PIK3R1/CAMK2G/RRAS/ITGA5/CAV1/PPP1R12B/FLNA/ACTB/ITGB3	25	brown
hsa04970	Salivary secretion	15/408	90/8011	4.24008e-05	0.00056181	0.000412849	GUCY1A1/PRKACB/ITPR1/ATP2B4/ATP1A2/PLCB1/ADCY5/ADRB2/ATP1B2/VAMP2/CALM1/KCNMA1/PRKG1/GUCY1B1/ADCY9	15	brown
hsa04927	Cortisol synthesis and secretion	12/408	65/8011	8.92467e-05	0.00105281	0.000773666	PRKACB/PBX1/ITPR1/CACNA1H/PLCB1/ADCY5/PDE8B/KCNK3/AGTR1/CACNA1C/KCNK2/ADCY9	12	brown
hsa04971	Gastric acid secretion	13/408	75/8011	9.03359e-05	0.00105281	0.000773666	PRKACB/ITPR1/GNAI1/ATP1A2/PLCB1/ADCY5/ATP1B2/MYLK/CALM1/CAMK2G/KCNK2/ACTB/ADCY9	13	brown
hsa04010	MAPK signaling pathway	31/408	295/8011	9.13762e-05	0.00105281	0.000773666	PRKACB/FGF10/CACNA2D1/PLA2G4C/SRF/CACNA1H/CACNB2/TGFBR1/FGF1/HSPA2/ANGPT1/FGF2/AKT3/RAP1A/KIT/FLNC/ARRB1/CACNA2D3/MRAS/DUSP3/JUN/RPS6KA5/FGFR1/TGFB2/MAP3K20/RRAS/GADD45B/PPP3CB/CACNA1C/FLNA/MAPT	31	brown
hsa04015	Rap1 signaling pathway	24/408	210/8011	0.000160713	0.00177454	0.00130403	FGF10/GNAO1/GNAI1/PLCB1/PRKD1/FGF1/ANGPT1/FGF2/ADCY5/AKT3/RAP1A/KIT/TLN1/MRAS/CNR1/CALM1/FGFR1/MAGI2/PIK3R1/RRAS/ACTB/ITGB3/ADCY9/ENAH	24	brown
hsa04926	Relaxin signaling pathway	17/408	129/8011	0.000273821	0.0029025	0.00213292	PRKACB/GNAO1/GNAI1/PLCB1/TGFBR1/ACTA2/ADCY5/AKT3/COL4A5/ARRB1/GNB5/JUN/GNG7/PIK3R1/COL4A6/SHC2/ADCY9	17	brown
hsa04929	GnRH secretion	11/408	64/8011	0.00033712	0.00343603	0.00252499	ITPR1/CACNA1H/PLCB1/AKT3/ARRB1/GABBR1/TRPC4/PIK3R1/TRPC1/CACNA1C/GPER1	11	brown
hsa04728	Dopaminergic synapse	17/408	132/8011	0.000361056	0.00353069	0.00259455	PRKACB/ITPR1/GNAO1/GNAI1/PLCB1/ADCY5/AKT3/ARRB1/PPP2R3A/GNB5/GNAL/CALM1/PPP2R5B/GNG7/CAMK2G/PPP3CB/CACNA1C	17	brown
hsa04260	Cardiac muscle contraction	13/408	86/8011	0.000373054	0.00353069	0.00259455	CACNA2D1/SLC8A2/ATP1A2/TPM1/CACNB2/ATP1B2/CACNA2D3/CASQ2/SLC8A1/RYR2/CACNA1C/TPM2/COX7A1	13	brown
hsa04923	Regulation of lipolysis in adipocytes	10/408	55/8011	0.000391047	0.00357336	0.00262591	PRKACB/GNAI1/ADCY5/ADRB2/AKT3/PTGS1/PTGER3/PIK3R1/PRKG1/ADCY9	10	brown
hsa04725	Cholinergic synapse	15/408	112/8011	0.000520796	0.00460036	0.0033806	PRKACB/ITPR1/GNAO1/GNAI1/PLCB1/ADCY5/AKT3/KCNQ4/CHRNA3/GNB5/GNG7/PIK3R1/CAMK2G/CACNA1C/ADCY9	15	brown
hsa04710	Circadian rhythm	7/408	31/8011	0.000765201	0.00654124	0.00480687	PRKAB2/PER1/RORA/PRKAG2/PRKAA2/PER3/CRY2	7	brown
hsa04213	Longevity regulating pathway - multiple species	10/408	62/8011	0.00104565	0.00858162	0.00630626	PRKACB/HSPA2/ADCY5/PRKAB2/AKT3/CRYAB/PRKAG2/PIK3R1/PRKAA2/ADCY9	10	brown
hsa05100	Bacterial invasion of epithelial cells	11/408	73/8011	0.00106865	0.00858162	0.00630626	ARHGEF26/ILK/GAB1/PIK3R1/SHC2/ARHGAP10/ITGA5/CAV1/VCL/WASF1/ACTB	11	brown
hsa04514	Cell adhesion molecules (CAMs)	17/408	147/8011	0.00125119	0.00975069	0.00716535	NLGN2/NFASC/SDC3/JAM2/SDC2/CNTNAP1/NEGR1/ITGA9/CNTN1/CADM3/NCAM1/ITGA8/NLGN4Y/NCAM2/JAM3/NRXN3/LRRC4	17	brown
hsa04911	Insulin secretion	12/408	86/8011	0.00128783	0.00975069	0.00716535	PRKACB/ATP1A2/PLCB1/KCNMB1/ADCY5/ATP1B2/VAMP2/KCNMA1/RYR2/CAMK2G/CACNA1C/ADCY9	12	brown
