# Supplementary material for: Comprehensive Molecular Characterization and Identification of Prognostic Signature in Stomach Adenocarcinoma on The Basis of Energy-Metabolism-Related Genes
Source: Research Square preprint supplement (doi:10.21203/rs.3.rs-138125/v1), 2021-01-14
Supplement: Supplementary file 7 [file d234b5c2d3ac081a811cca59.docx]

**Supplementary Table 1.** Pathways associated with energy metabolism in the Reactome pathway database

| Metabolic pathways from Reactome | PathwayID | Gene Count |
| --- | --- | --- |
| Biological oxidations | R-HSA-211859 | 216 |
| Metabolism of carbohydrates | R-HSA-71387 | 290 |
| Mitochondrial Fatty Acid Beta-Oxidation | R-HSA-77289 | 37 |
| Glycogen synthesis | R-HSA-3322077 | 16 |
| Glycogen metabolism | R-HSA-8982491 | 27 |
| Glucose metabolism | R-HSA-70326 | 90 |
| Glycogen breakdown (glycogenolysis) | R-HSA-70221 | 15 |
| Glycolysis | R-HSA-70171 | 71 |
| Pyruvate metabolism | R-HSA-70268 | 31 |
| Pyruvate metabolism and Citric Acid (TCA) cycle | R-HSA-71406 | 55 |
| Citric acid cycle (TCA cycle) | R-HSA-71403 | 22 |
| Sum | 871(unique:587) | |
