# Supplementary material for: Comprehensive Molecular Characterization and Identification of Prognostic Signature in Stomach Adenocarcinoma on The Basis of Energy-Metabolism-Related Genes
Source: Research Square preprint supplement (doi:10.21203/rs.3.rs-138125/v1), 2021-01-14
Supplement: Supplementary file 8 [file 02a9791a3a93bd4e1923d71b.xlsx]

## Sheet: Tra_exp
Supplementary Table 7. Hub genes satisfied high degree, closeness, and betweenness scores in the PPI network
Rownames(tra.data)	A1_OS	Status	TNRC6C	STOM	PTPRB	AP1M1	GPR68	CD93	APLNR	TACR2	GPR17	NMUR1	TLL1	QKI	CCL11	GPR4	EDNRB	AVPR1A	COL4A4	S1PR3	HTR2A	HSPA2	DYNC1I1	BDKRB1	ITGA9	RHOQ	RAB6B	F2RL3	GPER1	LAMB2	EDNRA	LPAR1	F2RL2	RHOJ	PTGFR	COL11A1	PTGER1	ADCY4	S1PR1	COL5A3	RHOB	COL18A1	GAB1	PPP3CB	LAMA4	PLCB1	GFRA1	SPHK1	CHRDL1
TCGA-BR-6565-01	279	1	2.09844	6.7675	3.22166	4.38728	4.34968	5.07292	4.63376	4.93351	0.482488	1.37532	0.445472	3.36639	4.26693	3.28831	2.37187	1.36184	1.485	3.28479	0.857487	3.46198	1.5748	1.90401	4.57737	4.87174	1.79942	3.03289	1.74132	5.71874	4.19062	3.31459	4.3775	3.52277	1.03342	4.88149	0.907919	1.94809	4.48163	4.40165	8.39658	6.21385	3.15066	4.46038	4.97773	2.60454	0.962254	4.01759	2.86217
TCGA-HU-A4GF-01	785	0	2.65721	7.00432	2.73671	2.93873	1.99714	6.14992	6.29007	0.395442	0.293926	0.830091	0.619751	2.82805	3.13116	4.16579	3.09273	1.98344	0.425579	2.28639	0.0287426	2.95455	0.357019	1.89072	3.93906	4.47629	3.1358	3.41067	0.811227	5.85907	2.9252	1.97442	3.81675	3.51762	0.741747	0.144016	0.45592	2.33751	4.99907	3.48245	9.35164	7.06835	3.25128	4.57162	4.40107	2.97626	0.42965	2.77283	0
TCGA-CD-5813-01	315	1	3.32558	7.13302	3.62621	3.54764	3.64526	6.50796	7.20089	1.52645	0.373272	2.93722	1.5418	4.06586	4.82981	4.56832	4.43259	2.73927	3.48892	3.78522	1.49729	6.01698	0.711507	3.1746	3.35037	4.45357	2.19107	4.90346	2.05648	6.97382	4.75245	4.63353	2.73592	4.51207	2.0808	2.90054	2.59408	3.01785	6.32484	4.11757	8.27792	7.56844	4.03482	4.42128	5.23432	2.30546	3.48939	4.44991	6.45963
TCGA-HU-A4GD-01	399	1	2.50813	3.81876	2.89333	2.59749	1.34545	2.84991	2.21308	0.580993	1.21656	0.84296	0.531762	1.84133	2.18036	2.29674	1.95798	0.517317	1.02502	1.46059	0.228336	1.48777	1.45908	1.26227	2.16671	3.45842	1.84502	2.11072	0.906918	3.50534	2.2963	2.45791	3.27281	1.6797	0.959766	0.668113	1.23719	1.48782	2.54725	2.64285	7.39605	3.21662	1.90176	3.89742	2.61497	2.29369	0.614918	2.51375	0.531258
TCGA-RD-A8NB-01	230	1	3.76219	7.83443	3.90893	3.21681	3.39515	5.79314	5.64009	5.51429	1.59707	1.48256	1.9775	4.04846	4.6461	3.17422	2.61951	2.11055	2.25139	4.23905	2.06687	3.18322	1.3382	1.69883	3.42818	4.71835	2.06611	2.39508	1.85339	6.77611	4.05128	4.22396	3.89085	4.64604	1.85158	2.39427	2.28449	3.11389	5.26294	3.75861	9.38782	6.54073	3.53326	5.32394	5.3654	3.26721	2.656	3.11154	4.49498
TCGA-SW-A7EB-01	176	0	2.56816	6.74455	2.26005	3.14064	2.44814	4.06542	4.26843	1.24204	0.390999	1.4291	0.324999	3.55222	4.7772	2.5539	3.93854	1.46099	0.565769	2.35373	0.670282	2.88648	0.604136	1.37492	2.53794	3.7381	1.98088	2.27221	2.86778	4.86636	2.45536	3.54617	4.11691	2.9334	0.462545	0.930115	2.74076	1.77182	4.36258	1.68585	7.78227	5.00511	4.09539	3.91274	3.83687	2.36364	2.11717	2.26891	1.08486
TCGA-BR-7717-01	552	0	1.59027	6.27326	1.90813	2.79304	2.32514	4.32755	4.09833	4.00581	0.361672	0.990655	0.37617	2.40237	3.57676	3.32678	3.29571	1.61838	0.71824	3.44889	0.796357	3.18028	1.83712	2.08218	2.12972	4.05522	2.53995	3.04957	1.41403	5.77628	3.74846	2.82974	2.98493	3.25202	1.01609	2.91112	3.14643	1.12726	3.95771	3.57573	8.95312	5.99794	2.54965	4.34611	3.93818	1.91637	1.07995	3.29817	2.58082
TCGA-D7-6527-01	75	1	2.84927	5.6247	2.33283	2.50982	2.70362	5.00287	5.93367	1.1134	0.239585	0.960048	0.390528	2.25394	6.37758	2.86367	3.32537	1.24073	0.654362	2.10391	0.446773	2.35026	0.939738	1.03543	2.64414	4.20647	0.96029	2.6259	0.858619	5.77574	3.03703	3.65455	3.86532	2.71762	0.930162	0.147673	3.37898	1.40697	4.15283	2.87797	7.49772	6.0015	2.99645	3.6233	3.73448	1.75478	2.80383	2.32943	1.28643
TCGA-BR-4279-01	291	0	2.06225	8.22448	3.12748	2.99662	3.94437	6.17568	5.96399	4.23339	0.438321	1.6714	2.09344	4.74212	7.01196	3.27915	4.67986	3.19855	2.45348	4.3909	2.23557	3.306	1.91269	3.50714	3.79609	5.61516	1.70825	3.3484	1.1086	5.73328	5.6226	5.42744	5.39291	4.50783	4.00567	4.26383	2.41259	1.4366	5.93896	2.62129	8.93921	3.70488	4.225	5.38895	5.07794	2.43901	3.38752	3.15418	3.64221
TCGA-BR-8368-01	131	0	3.36746	6.20618	4.00411	3.43321	2.33676	4.57911	4.52256	1.65705	0.333727	1.40158	0.238752	2.11876	4.61664	3.01107	2.81599	0.496818	0.907914	1.62945	0.201169	2.30061	4.03935	0.710851	1.82626	4.11943	1.71314	2.96839	0.367898	5.85891	2.78767	1.30401	4.24796	2.71285	0.689888	1.12855	0.41654	1.66355	4.16811	2.85577	9.50496	5.30165	3.31664	4.23968	3.73669	1.3486	0.58766	2.13651	1.12788
TCGA-BR-8289-01	81	0	3.6041	7.35945	2.87387	3.22638	3.90723	4.54119	4.3036	4.4841	0.605483	1.81749	0.606544	4.16236	4.77114	2.703	2.57463	1.26084	3.12386	3.6555	0.956907	2.4554	1.15476	0.50106	3.58476	5.21177	2.66217	3.16475	1.396	7.13108	4.35762	4.24535	5.32342	3.36843	1.0635	0.852154	2.57687	2.16232	4.32188	2.51451	7.75158	5.75216	2.67922	5.13916	4.25256	2.41363	1.82092	3.29023	4.29594
TCGA-F1-6875-01	2197	0	2.61585	5.40152	2.42918	3.41609	2.8077	5.12287	4.83507	1.1464	0.271197	0.416821	0.197705	3.44575	0.259304	3.76612	1.42113	0.32124	0.280613	4.33505	0.0846667	2.56217	3.10272	1.21721	1.37375	5.25799	0.61419	2.48549	0.998935	6.62256	2.7344	1.32888	1.03794	3.14251	0.536741	3.13988	2.61899	1.3497	4.01723	3.80142	8.14738	8.09141	1.47749	4.87007	3.39489	5.73044	0.0619904	3.43233	0.0155541
TCGA-VQ-A8PP-01	502	1	3.31846	6.42153	3.96953	3.54754	4.03031	4.66501	3.92525	1.87621	0.522172	0.436379	0.485487	4.41749	3.63001	3.2991	1.96854	1.29688	1.94481	2.41719	0.380792	2.03569	0.895802	1.43671	2.65424	4.72004	4.55966	2.21647	0.692898	7.79071	3.84565	4.07651	2.93329	3.07194	0.589295	5.67802	3.0841	1.75812	3.84665	4.04903	7.57828	6.0877	2.81926	4.77271	4.59098	1.74573	1.04137	4.86532	1.67984
TCGA-RD-A7C1-01	438	1	1.93979	6.42556	2.44919	3.19953	3.05009	4.55764	4.86693	1.25073	0.912068	1.02765	1.42952	2.69039	5.78063	2.74081	2.47188	1.30574	1.10943	1.75377	1.22183	1.55862	2.5136	0.696917	1.97195	3.84526	1.79083	2.88974	1.15305	4.54124	2.75686	2.41258	2.80614	3.15878	1.15465	2.02493	1.23636	1.99487	3.99903	3.23836	6.25407	5.08962	2.66023	4.24549	3.66878	2.32058	1.0362	3.22329	1.22536
TCGA-D7-5577-01	376	1	2.25657	6.09405	2.23034	3.25763	2.6544	3.83218	3.48143	2.40467	0.317914	1.22845	0.17291	2.95135	4.12739	3.1066	2.3457	0.275977	0.557652	2.1167	0.200397	2.63025	1.51644	0.685023	2.16541	3.85967	0.573819	1.94905	0.383113	5.98876	2.79336	1.26935	4.92591	2.39104	0.23607	1.54921	1.86945	0.907366	3.50715	2.95727	8.33638	5.5429	2.63774	4.14461	3.89836	0.503802	0.748788	3.03288	1.6568
TCGA-CG-4301-01	92	0	2.39915	7.50682	5.59676	2.94474	2.79571	5.7673	5.14487	1.08692	0.557349	0.758912	0.823108	4.24749	4.60564	3.91693	3.55709	2.53082	2.05327	3.10035	0.85188	2.20936	2.53806	1.66415	3.41968	4.82808	1.82238	2.71472	4.53443	5.43369	4.97261	4.60009	3.98045	3.88262	1.50434	4.92793	2.04615	2.68385	4.82599	2.8709	7.95796	5.19113	3.55619	4.82426	5.36102	2.27497	2.19375	3.17628	1.88401
TCGA-BR-7959-01	1010	0	3.73898	8.26874	3.69251	3.63016	4.06365	6.32698	4.60287	3.49525	0.76691	1.70737	1.06294	4.58161	5.31268	4.21555	4.32878	2.04497	3.44521	5.54348	1.34123	3.49899	2.1522	1.9378	4.40541	5.40189	2.13384	4.15858	1.09547	7.1149	5.15216	3.90997	5.79928	4.35064	1.84569	3.43869	1.90268	2.40861	5.71366	3.93797	8.88032	7.11675	3.88912	4.63663	5.79881	3.70652	2.24071	4.50515	5.94381
TCGA-BR-8372-01	951	0	1.62797	8.05063	2.58873	2.90156	2.79933	3.61585	4.09042	2.40953	0.147714	0.710313	0.456171	3.24592	3.69304	2.29988	1.93138	1.34003	0.551529	2.37624	0.224336	1.8042	0.606284	0.899274	1.90632	4.23089	1.12321	1.85982	0.936948	6.38533	3.29769	4.62006	3.86005	2.82688	0.664207	1.89053	0.901886	1.48024	4.36724	1.85625	7.89532	3.54764	3.10201	5.686	3.11005	2.94048	0.952448	3.3849	2.37498
TCGA-CG-4436-01	243	0	1.71679	5.35002	2.4065	2.31936	1.23066	4.57563	3.48174	0.538991	0.238022	0.457918	0.107478	2.42502	4.51629	2.79293	2.88661	0.869023	0.101151	1.71331	0.196657	1.58034	0.25675	1.25685	1.91147	4.20366	1.84519	1.34882	0.321876	3.90621	3.47483	2.53535	3.76606	2.2462	0.446768	0.403777	0.28303	1.19244	3.25001	2.95384	6.61317	4.01311	2.68286	4.3087	3.72362	3.01107	0.181892	1.55072	0.0736567
TCGA-VQ-A8DU-01	158	1	2.36932	6.01448	1.99634	2.64356	2.34493	3.85327	3.97328	0.619346	0.253516	0.821757	0.327313	2.49681	5.70075	2.64719	3.59697	1.32367	0.979257	2.73602	0.800802	3.03049	2.56743	1.23386	3.19705	3.76449	1.59836	1.8755	3.31803	4.97549	3.45955	2.32355	3.64184	3.00137	0.592608	2.43619	4.10445	1.81685	3.71362	2.79273	7.08885	6.31703	3.12006	4.31595	4.06397	2.78781	1.24146	3.41411	0.850276
TCGA-BR-A4J8-01	411	0	3.25028	7.0341	3.02008	2.53071	2.19708	4.79996	4.7827	5.71397	0.951338	1.17202	0.846509	2.9355	3.63798	3.61276	3.24883	2.04304	0.765601	3.8661	0.953167	3.3692	1.4878	1.95297	3.42217	3.82809	1.32395	4.42121	2.05927	5.95752	4.88324	1.77194	4.73569	3.52603	2.33935	0.411069	2.47669	2.54604	5.05753	2.71572	8.63247	5.77898	3.07397	3.8785	4.48807	1.38849	2.72918	2.5529	3.40701
TCGA-VQ-AA6J-01	838	0	3.60957	6.82213	2.99608	3.2603	3.30523	5.53034	5.32696	0.647493	0.179946	1.21841	0.38583	3.48162	4.21669	4.39987	2.92355	1.36283	1.82496	3.7401	0.348676	2.34171	0.829242	0.771955	2.36487	5.29033	2.26342	3.66749	0.784932	5.53328	4.35956	2.96549	4.48001	3.48999	1.025	2.20804	1.93731	2.16535	4.57986	4.82648	6.18466	6.39141	3.58971	4.62134	4.99372	3.42523	1.08907	3.6122	0.55352
TCGA-CG-4443-01	912	0	3.52629	5.99477	2.9992	2.96724	1.22263	5.20838	4.97659	1.06837	0.190048	1.4233	0.263022	2.76564	0.0615249	3.55426	2.963	1.1772	0.307481	3.79747	0.170415	1.32036	1.91786	0.386049	2.62358	3.91024	0.967225	1.6187	1.35195	6.58289	3.55986	2.46205	3.03035	3.17493	0.534819	2.66469	0.48232	1.67406	4.07543	3.05773	5.84159	5.93039	2.80399	4.46815	4.33295	2.51987	0.468569	3.62122	0.468589
TCGA-BR-7715-01	1023	0	2.36724	6.24344	2.88063	3.60771	3.59787	4.84231	4.73828	3.79142	0.144751	0.857592	0.432723	2.90437	5.09507	3.74729	3.81855	1.85433	0.459539	4.32109	1.77511	2.01784	0.824881	1.05187	2.71306	4.91855	1.37634	2.93144	1.62005	5.81185	4.68555	2.93616	4.6138	3.63609	1.40842	2.44351	2.81096	1.55267	4.64937	4.63577	8.45294	6.96567	2.20983	4.87539	4.45204	3.3743	0.797343	3.1073	2.57288
TCGA-VQ-A91U-01	52	0	2.35485	5.92236	3.2081	3.07831	2.52439	4.91665	5.05904	0.442143	0.174395	0.968924	0.285705	2.86235	3.14153	3.732	2.94121	1.22359	0.591094	2.37492	0.181743	2.37029	0.239172	1.0323	4.04796	4.06113	0.753458	2.43492	0.763426	5.15238	3.77759	2.01907	4.91674	3.04556	0.917022	1.95054	1.50363	2.04953	3.90825	3.09513	7.91726	5.5698	3.03987	4.79006	4.60915	3.48699	1.01021	2.52514	0.316311
TCGA-CG-5717-01	120	1	2.4047	6.95811	2.44386	3.2668	3.51391	4.90257	5.28425	2.9935	0.317306	0.7753	1.35607	4.00077	5.24854	2.82855	3.24498	1.51873	1.27394	2.65836	0.243176	4.67533	0.507162	3.80397	3.07328	3.47908	1.62976	2.05736	1.22736	5.78161	3.16925	4.15406	2.50616	3.54426	0.892379	0.191518	1.95363	2.17814	5.06374	3.10779	8.03888	5.70019	4.15714	4.52714	3.69841	1.80954	2.25926	3.93897	3.74587
TCGA-BR-8364-01	675	0	4.42338	8.33202	3.91646	3.90116	3.97194	6.092	6.04512	6.31094	1.88851	2.77091	2.5196	4.98991	4.82492	3.24407	3.50284	2.77826	2.76762	5.42054	2.18515	3.92839	2.5869	2.49328	5.55508	5.6429	3.2216	4.67387	3.36106	7.58523	6.00047	4.96264	5.76738	4.98611	3.56136	1.6655	3.80995	3.10571	6.31411	3.90856	9.69891	7.11755	4.73871	5.13921	6.37684	3.33358	5.04637	2.83682	5.03459
TCGA-BR-8683-01	300	0	3.64595	8.38912	4.55209	3.92938	3.33611	6.76317	5.79276	4.0422	1.25917	1.81465	1.91306	4.49152	4.56881	5.12946	4.98398	3.13665	3.10121	4.8283	1.29336	3.12219	1.49988	2.7463	4.76362	4.81724	2.94769	4.93014	1.54824	7.11987	5.21118	3.32132	5.72015	4.55199	2.11792	4.5325	2.74612	3.20334	5.64999	4.25433	8.90581	7.91954	4.56296	5.41608	6.59763	3.3196	2.91614	3.38322	2.77215
TCGA-R5-A7ZR-01	185	1	2.26532	5.94955	1.6666	2.4648	1.18137	3.52096	3.93408	0.982294	0.71609	0.349325	0.0342492	2.12627	1.32613	2.39679	3.5611	0.398569	0.429735	0.959331	0.0456266	1.08821	1.63071	0.443994	1.33815	3.22387	1.0641	1.59275	0.264055	4.2498	1.95141	2.73302	3.62106	2.03028	0.264541	0.765239	0.966258	1.17992	2.95187	1.62362	6.95506	3.67885	3.09132	3.47842	2.88083	2.37316	0.854044	1.20756	0.535518
TCGA-D7-A6EY-01	348	1	2.96756	7.44327	2.89639	3.35571	3.38631	4.81882	4.71473	3.4652	0.706276	1.52116	0.506408	3.37309	5.04662	2.9044	2.32059	0.710648	2.40149	4.09569	0.478916	2.57192	1.08369	0.705561	3.23963	4.46543	2.1309	2.25232	1.54027	6.20327	3.7105	3.91602	4.78081	3.37403	1.41484	2.27685	0.672276	1.94458	4.84071	3.70953	7.78997	5.82838	2.76963	4.5475	4.62944	2.14286	2.73308	3.59863	2.45727
TCGA-BR-7722-01	466	0	2.84056	6.58937	2.33976	3.22694	2.62618	4.1981	3.60961	4.00206	0.39506	1.47111	0.2843	2.7328	4.00186	3.25073	2.53715	0.757561	0.649247	2.93391	0.647923	1.80372	2.46145	0.784515	2.69921	3.86828	1.32443	4.40228	1.029	6.71999	3.39491	2.02376	3.92773	3.05253	0.883961	0.419582	3.8971	1.96692	4.15018	3.25223	9.31037	5.6748	2.61252	3.63085	4.311	0.77729	1.63448	1.83068	3.14768
TCGA-BR-8686-01	635	0	4.18754	7.89555	4.28272	3.40209	2.88065	5.94115	5.60336	4.87943	2.25635	2.30269	1.15738	3.93151	5.9873	4.14121	5.37212	3.51032	2.84397	4.48587	1.093	3.27318	1.35683	1.79734	4.19784	4.65786	2.21764	6.11863	2.26505	7.0424	4.18759	3.66183	4.85523	4.14747	2.65422	0.699737	2.90953	3.16747	6.33887	3.2796	9.24462	6.02821	4.11769	4.67244	4.85477	3.109	2.82921	2.06887	5.06508
TCGA-D7-8572-01	511	0	3.6925	7.88386	3.36776	4.53915	4.37797	5.91405	5.5116	3.85909	1.26807	1.59198	1.07323	4.10265	5.25105	3.83609	3.7808	1.9995	2.30017	3.69036	1.41569	3.14395	1.15006	1.82814	3.78438	5.05936	2.85762	2.87661	1.93493	7.22297	4.77177	4.02004	4.93978	3.8655	2.35457	6.14321	1.97171	2.28567	4.92216	5.46486	9.47308	6.99196	4.31201	4.78029	5.95983	2.844	2.98657	4.4658	1.6467
TCGA-HU-8238-01	46	0	1.61707	5.98829	2.15276	2.4108	2.27615	4.62149	4.30466	1.11056	0.103226	0.645858	0.413442	2.23768	5.11884	2.86278	2.75722	0.845893	0.816252	1.82344	0.309807	1.9435	0.323713	1.5904	1.99363	2.91228	0.938977	3.478	0.408332	5.31566	2.37533	2.44603	3.02113	2.64249	0.938239	0.287505	3.30262	1.46896	4.36448	2.95867	7.03281	4.93972	1.81948	3.8521	3.5852	1.29344	1.2207	1.92238	0.985841
TCGA-BR-6455-01	385	1	1.86632	6.61015	2.86033	3.5319	2.65771	5.04811	4.73909	3.11734	0.297772	2.63192	0.753698	3.26791	5.29217	3.25799	2.10341	1.35329	1.99245	3.57913	0.560111	2.39363	1.33477	2.17141	3.61531	5.20689	1.27516	4.50851	0.989953	6.15138	2.94056	2.82341	4.7989	3.54282	1.31832	2.81189	1.25401	1.90433	4.98535	2.86751	8.96644	6.01303	3.11563	5.1229	4.17594	1.75544	1.37085	3.25209	3.95461
TCGA-KB-A6F7-01	1935	0	2.68702	7.37366	1.90883	3.27976	2.12235	4.37532	4.21137	0.927701	0.810887	1.26082	1.05058	2.93955	3.87878	2.40632	3.73909	0.711162	0.568366	2.73302	0.0720046	2.3149	1.00584	1.04575	2.88582	4.09181	3.19043	3.68564	1.02995	5.74977	2.34334	3.89282	4.39762	2.47716	0.525667	0.214358	1.47632	1.56672	4.27709	2.10729	8.90921	4.3514	3.02186	4.20712	3.54007	1.93242	1.00373	2.88503	0.0823453
TCGA-FP-A9TM-01	189	0	3.32426	6.96451	2.90821	2.54272	2.3904	4.26898	4.1226	0.771849	0.732263	0.473278	0.472408	2.93654	3.15346	2.57434	3.15368	0.730334	2.22143	3.39546	0.220173	1.75248	0.207464	0.911139	2.23006	4.11099	1.58142	2.735	1.40084	5.36499	2.15672	3.28512	3.28251	2.89707	1.48942	0.0229388	1.69477	2.28547	4.51077	1.95296	7.36841	3.96833	3.4481	4.43263	3.1692	2.85458	2.21861	1.83175	1.11866
TCGA-VQ-AA6F-01	546	1	2.68687	8.04991	3.10548	3.41673	2.36328	4.98291	5.34055	0.864135	0.9833	1.02324	0.487401	3.17985	3.0088	3.76423	2.94173	0.963439	0.972043	2.46337	0.287687	2.83747	1.52307	0.844918	2.34791	3.8563	1.89272	2.86873	0.710764	6.20323	2.87679	3.5509	3.37869	3.51142	1.07065	0.0598456	2.67238	2.70812	4.32154	2.90807	7.64823	5.91939	2.60757	4.36964	4.24687	3.25736	4.55386	1.48625	0.603659
TCGA-VQ-A91E-01	664	0	3.13873	6.61211	2.10154	2.71951	2.34352	4.04525	3.20407	0.751851	0.483067	0.592209	0.274645	2.69902	3.79888	2.38039	3.16675	0.617712	1.16943	1.65758	0.14147	1.62219	0.24272	0.541214	1.87498	3.63811	1.58988	2.47274	0.845874	7.65222	1.9184	2.42575	3.51235	2.11048	0.502383	0.113422	1.15269	1.99451	3.5995	2.15469	8.19867	4.51567	3.02422	4.51306	3.40753	2.02318	1.39679	2.73796	0.146335
TCGA-CG-4305-01	457	1	2.99702	7.42253	3.85559	3.38919	3.58834	4.76851	4.47191	1.81913	0.569525	1.22767	0.793922	3.78606	3.81167	2.58025	2.28325	1.73404	2.2245	3.62502	0.940752	2.3276	0.686694	2.60509	3.18464	4.78441	2.44976	1.87869	1.08484	6.69822	4.79145	3.59779	4.12471	3.49879	1.14605	2.86057	1.08391	2.49451	4.38542	3.66573	6.31151	5.39149	3.37995	4.72244	5.25868	1.80982	1.47124	3.877	4.1053
TCGA-MX-A5UJ-01	600	0	2.59553	7.25143	2.84434	3.12101	3.53054	5.70757	6.30863	4.93433	1.79134	1.03504	1.38406	3.22367	6.15506	3.53954	2.83631	2.18259	2.37942	3.88818	0.957049	3.25325	1.4067	1.95346	2.52646	4.49806	1.88623	3.45851	2.0196	6.65453	4.73182	3.62135	2.71372	4.4237	1.54025	2.30682	3.46048	2.97506	5.25013	4.03869	9.10108	6.27237	2.89641	4.31695	4.84129	3.17042	2.32729	3.97911	2.67855
TCGA-R5-A805-01	281	1	2.47692	6.88621	2.79958	2.31113	2.55371	5.95118	4.65038	1.35818	0.194163	0.542966	0.879538	3.62522	4.14336	4.19071	3.01995	1.81419	1.14322	3.44686	0.727419	2.16355	1.3631	1.21025	2.57125	4.51172	2.55595	3.26654	2.05895	5.79233	3.944	3.39212	2.85544	3.36328	1.11767	2.88478	1.32877	1.55178	4.65433	4.7892	7.23477	6.23748	2.5881	3.63663	4.88562	2.62801	1.13927	2.89261	1.50614
TCGA-D7-8578-01	451	1	3.65652	7.55489	3.05955	3.49741	4.86984	4.80216	3.88734	3.3214	0.851669	0.892791	1.27693	4.07544	4.82429	3.14702	3.10099	1.32673	2.17222	3.65504	0.538921	3.02448	1.18395	1.8699	3.68448	4.92098	1.94973	3.26562	1.92335	6.94822	4.35653	3.36203	2.69298	3.68205	0.997256	5.4413	4.45423	1.6215	4.17633	3.79887	8.92695	6.59545	3.50231	4.19354	5.19983	3.24908	2.21261	4.61279	3.12699
TCGA-BR-8286-01	895	0	2.61388	6.83436	3.33501	3.05552	2.25303	5.3846	5.53186	2.47092	0.258244	1.20772	0.611497	3.81463	5.52629	4.03312	4.47347	2.3785	1.3467	2.49703	0.960869	3.30808	0.61813	1.06459	2.89153	3.99405	1.22908	4.41035	2.99697	6.54483	3.80765	3.1228	4.63415	3.5707	1.70825	1.86584	3.18195	2.40448	5.4786	2.491	7.30138	5.25291	3.16967	5.04961	4.85307	3.28599	0.709881	3.211	2.90692
TCGA-BR-8687-01	250	1	3.82428	6.5096	4.20942	3.07774	2.36646	4.42733	4.14026	2.91781	0.198709	0.6465	0.461101	3.01976	2.95347	2.40553	3.5762	1.41775	1.56051	3.61108	0.700283	3.40796	1.09109	0.318487	3.15059	4.70242	3.22739	3.72174	0.959852	6.57044	3.75363	3.7968	5.04021	2.63214	1.39803	1.52098	2.81887	1.56353	3.96194	3.12234	8.22553	6.30421	2.92766	4.73151	4.47881	2.07194	1.92638	2.43971	3.16172
TCGA-BR-A4CS-01	45	0	2.28236	6.13808	2.12025	2.37144	2.36967	4.86638	4.82547	3.90475	1.58895	0.468434	0.332295	2.80872	4.51595	3.74307	2.67572	1.56786	0.374762	2.1085	0.91557	1.7804	0.358953	0.755376	1.54888	4.74363	1.31464	2.80051	2.00475	5.45076	3.28932	2.00195	2.8087	3.45149	1.11421	1.5351	3.90648	1.77724	4.24813	4.92599	7.21842	5.85913	1.72486	3.8932	3.78808	3.23011	0.15709	3.08945	1.37177
TCGA-RD-A8MW-01	98	1	2.51525	7.13287	2.19376	2.72131	3.46232	4.95176	3.85252	3.32824	0.495682	0.478411	0.406696	3.43666	5.34083	3.71902	2.71952	1.44385	1.18625	3.25588	0.74093	1.61362	1.44814	1.86947	2.23511	5.02571	3.6547	4.13576	0.822704	5.04823	4.16334	3.25974	3.75006	3.23195	0.671731	5.17521	1.08093	1.61074	4.51739	4.41974	7.86937	6.17604	2.99745	4.06313	4.69497	2.38651	1.2911	5.93593	1.07226
TCGA-VQ-A8PO-01	256	1	2.76935	6.96008	2.97599	2.90733	3.75804	4.51657	4.44193	0.781871	0.336402	0.373384	0.175699	2.80864	4.30594	3.38937	1.75955	1.08678	1.07762	2.59324	0.297074	1.90249	0.357843	1.21916	1.9193	4.19401	0.927515	3.07514	0.592022	5.14375	3.13704	2.80662	2.61208	2.74234	1.79562	4.39264	0.84419	1.94304	3.96978	4.45843	8.46543	5.70153	2.5289	4.4842	4.17351	1.9184	0.330776	4.18923	0.493205
TCGA-VQ-A8PU-01	832	0	3.05008	5.62861	2.23442	2.55288	1.98813	4.41278	3.79673	1.23065	0.154572	0.665558	0.0678994	3.13214	0.417856	3.45038	3.06383	0.764741	0.279401	1.58893	0.0901114	2.10588	0.69741	1.03663	1.7157	3.70265	1.57624	1.87926	0.448387	4.73858	3.01012	4.11012	4.27882	3.51307	0.238078	1.61758	0.748663	2.33458	3.21749	3.03175	7.62419	5.31723	2.97231	4.72719	4.2681	2.6402	3.47817	1.98866	0.263456
TCGA-IN-A6RJ-01	379	0	1.59708	5.83411	0.903931	2.6791	2.41271	2.80563	2.1796	1.07254	0.358753	0.156167	0.412316	3.10909	1.95059	1.43422	1.16881	0.295869	0.260795	1.04231	0.0753714	3.9311	0.178952	2.78206	1.0968	2.37276	0.562845	0.918543	0.986811	5.07468	2.18295	2.73877	1.3936	1.9272	0.291544	0.026088	1.116	1.16558	2.56338	2.76273	6.34974	4.53121	3.65567	3.52112	1.62817	0.452637	0.293907	4.29998	1.20669
TCGA-D7-6521-01	192	1	2.35102	7.42956	3.57337	3.64134	4.96132	5.53605	5.80967	1.31482	0.294457	0.784124	0.634833	3.56643	5.31776	4.13929	3.30458	1.13622	2.67667	3.734	0.900723	2.76907	2.05977	1.43996	3.44815	4.70859	1.59781	3.47531	3.37164	6.00433	3.51766	3.24065	3.64099	3.44435	1.52823	4.84829	5.22556	1.65352	5.09105	4.43792	8.14705	6.76489	2.61558	3.8884	4.37821	3.0482	2.34965	3.7156	2.4577
TCGA-BR-8484-01	766	0	3.27025	7.04246	3.78979	3.31282	2.80535	5.47631	5.30944	0.575728	0.408917	1.55508	0.7159	3.81902	4.03049	3.18698	3.78063	1.54957	2.10554	3.12081	1.47135	1.88011	0.975529	1.02492	3.68555	4.81193	1.83965	3.33863	0.786664	5.88412	4.04347	3.22416	5.04321	3.4768	1.37313	2.39983	2.63119	2.3833	5.20646	2.62258	8.67843	6.18236	3.25294	4.90655	4.75342	3.00692	1.97719	2.73961	3.44523
TCGA-CG-4444-01	1431	0	2.19533	7.46211	4.06791	3.20823	3.15472	5.57022	5.29768	0.407968	0.342154	0.858271	0.61786	3.32102	4.95327	3.11395	3.10752	1.35954	2.05216	2.85541	1.28568	5.15109	1.0401	2.21066	3.16299	4.11667	1.58569	1.86798	0.311746	5.09453	3.43078	3.5721	4.31802	3.30479	1.35835	2.37112	2.55426	2.21206	4.3157	2.2589	7.05065	4.69928	3.47913	5.72923	4.55248	2.02148	1.43732	3.18175	3.25011
TCGA-BR-6458-01	574	1	3.12727	6.40913	3.07153	3.49426	4.22727	5.74728	5.82921	1.18759	0.394394	2.44958	0.578751	4.22995	3.63553	3.5073	3.3682	1.52737	2.86305	3.30167	1.07053	2.63814	1.84129	0.823094	3.60153	4.65418	2.70324	3.99689	1.52643	6.67514	4.76481	3.96358	3.54022	3.77251	1.08751	5.21856	0.950899	2.07212	5.14669	3.98224	8.05343	7.7113	3.17577	5.1872	4.96889	3.88989	1.18241	4.36781	3.36953
TCGA-RD-A7BT-01	123	1	1.56904	5.3871	2.85653	2.75415	1.77151	3.60572	3.37423	0.390637	0.313938	0.669606	0.0831738	1.88522	2.00319	2.54249	2.41855	0.866693	0.208951	1.2686	0.0410513	1.66797	0.410022	0.451916	1.85135	3.678	1.15702	2.39002	0.683201	4.48766	1.93178	0.982407	3.7304	1.91498	0.153046	0.36703	1.31327	1.07501	3.45988	1.95598	7.87334	4.98984	3.48266	4.68439	3.12378	3.27623	0.538902	1.78428	0.195266
TCGA-CG-5718-01	1095	0	2.43627	5.83173	2.28031	3.01027	2.1795	4.63955	4.21095	0.998727	1.40583	0.509578	0.0866665	2.35357	3.99763	4.28868	2.43328	1.56488	0.334192	3.19858	0.131653	2.59196	0.323033	0.933001	2.56798	3.70111	0.823406	3.60173	3.91385	6.80937	1.9695	1.44505	1.27551	2.84336	0.399642	1.86381	1.84667	2.1683	4.30861	3.65858	8.40939	6.51112	1.83746	2.89294	3.37154	2.63603	0.446529	4.6248	0.208343
TCGA-BR-4256-01	284	0	2.70895	8.16569	3.40942	3.92046	3.99519	6.45369	6.45102	4.87568	0.709113	0.968876	1.88034	4.93143	6.68468	4.03418	4.53546	3.07339	3.24114	4.26504	1.80959	3.76341	2.05708	1.98451	3.8833	5.7123	2.24748	2.63468	1.78694	6.55142	4.71557	4.98365	3.36235	5.07739	3.25389	5.17625	3.16706	2.45298	5.97769	4.50805	9.7103	6.11525	3.36896	5.31823	5.5574	3.13303	4.1738	4.75576	4.7952
TCGA-HU-A4GU-01	200	0	2.73809	7.03025	2.90485	2.24854	2.98907	3.82924	2.83416	0.427066	0.106498	0.478158	0.0387232	1.88755	2.47289	2.60548	0.882405	1.24651	0.327752	5.08459	0.1336	2.36464	0.11387	1.31978	4.0864	4.24803	0.834925	1.05673	0.405899	5.21363	2.52911	1.73504	1.3957	1.90051	0.710761	4.44198	0.611661	2.00518	2.76727	4.04937	6.83469	5.70032	2.81345	4.70488	3.38492	1.28917	0	2.89401	0.0493536
TCGA-BR-6852-01	1367	0	2.31391	7.92699	2.32553	3.37755	4.29381	5.09745	4.86529	0.845002	0.217884	1.71263	0.475867	3.33194	4.96425	3.60443	2.40568	1.45119	0.787522	3.48506	0.36776	2.00879	0.478418	2.27752	2.84165	4.34022	0.77911	3.078	0.758219	6.78432	4.08006	2.60358	2.61895	3.13622	0.688824	5.07965	0.940584	1.99116	4.30134	5.10941	9.0294	6.91057	2.69507	4.54359	4.44711	1.38593	0.344782	4.90345	2.61767
TCGA-BR-8059-01	439	0	3.1434	7.59082	2.94878	3.17973	4.26922	5.42572	4.87897	5.35778	0.473023	0.819769	0.883352	3.93037	5.40691	4.14383	3.23032	2.29478	1.11489	4.38861	1.14394	3.55151	2.13855	2.00223	3.44877	5.1069	3.33229	3.51658	1.95996	6.49854	5.29756	3.16054	5.21174	4.21953	1.59307	5.47612	2.96675	1.83344	4.76272	4.73413	9.56635	6.95583	2.71996	5.15004	5.49601	2.63815	1.93414	5.03047	2.55713
TCGA-BR-6705-01	779	1	4.22761	7.91009	4.13021	4.04209	5.20021	7.31206	7.77942	4.31224	1.79592	2.78073	1.72175	4.3682	5.70682	5.12818	5.08558	3.84188	1.82457	5.00366	2.24697	3.96379	2.19841	2.43619	4.43716	5.45794	2.62117	5.38268	3.11007	7.84674	5.55492	4.85401	4.314	5.37072	2.91004	4.10093	3.95568	3.90768	6.73813	5.66256	9.74952	8.42532	3.4256	4.53686	6.33355	2.91305	3.43065	4.71906	6.4478
TCGA-D7-5578-01	385	0	2.26879	6.34158	2.70159	4.7994	3.99658	5.41956	6.1842	0.877809	0.51742	1.79112	0.429031	2.86613	7.74816	3.71394	3.39807	1.34816	1.35008	2.81977	0.540326	2.59831	0.671045	2.2997	2.77927	3.83438	1.36556	2.97832	0.8822	5.70557	3.39613	3.12055	4.24122	3.62902	1.96395	1.29201	4.88197	2.02427	4.79036	3.91379	8.08161	7.05126	3.17715	3.76951	4.62699	2.09599	1.86804	3.29662	2.55317
TCGA-IN-A7NR-01	198	0	2.62019	6.77845	2.35834	2.71062	2.86929	4.07145	3.83588	1.41675	0.534777	0.478914	1.04421	2.93829	5.1695	2.30391	1.65596	0.754228	0.821402	2.1375	0.0748854	3.13421	0.669338	1.93533	1.84089	3.44671	0.937178	1.79627	2.44371	5.18113	2.44736	2.99354	1.98949	2.85087	0.509693	0.133136	3.1378	1.78201	3.94252	2.04854	7.86424	4.26439	3.50135	3.79307	3.32189	1.86534	2.09821	3.96446	1.96517
TCGA-D7-6815-01	486	0	2.64509	6.6326	3.45821	3.38736	3.80606	4.50822	3.85479	1.41853	0.0743611	0.881658	0.145917	3.09299	3.38232	2.7517	2.86836	0.787922	0.699086	3.52101	0.434771	2.44435	0.377375	1.72473	3.5024	3.88801	2.66286	2.3102	0.889431	6.82538	3.36003	2.53068	4.14796	2.36372	0.855357	4.67765	2.01757	1.59728	3.50866	3.55647	7.66756	6.26122	3.23202	4.56772	4.63281	2.26548	1.05339	2.96813	1.51102
TCGA-CD-8533-01	226	1	3.77384	5.87866	3.28998	4.33509	2.69949	4.56399	4.99645	0.787442	3.17717	1.50378	0.534704	2.41465	3.0231	2.76032	2.19006	0.820228	4.29259	3.0904	0.843333	2.74875	3.49539	0.751704	3.68884	3.73476	3.3769	2.96118	3.86798	5.80901	4.18698	1.8628	5.6098	3.17112	1.31901	2.78838	2.93934	1.62839	4.11183	3.32817	8.01573	6.94743	3.89098	5.13973	4.23707	5.57901	0.954874	2.34468	3.40723
TCGA-VQ-A924-01	1686	1	3.45601	7.08633	2.19452	2.03233	3.74748	4.4141	3.7195	3.11507	0.878976	0.930598	0.454361	2.86392	2.73655	2.81688	2.15508	1.14968	0.700061	3.05586	0.367166	2.24797	0.424328	1.04183	2.5921	4.15307	1.10673	2.83597	0.642227	6.38226	3.64269	2.09284	3.39324	2.76959	1.12523	4.58493	0.697158	1.9241	3.96919	5.75846	9.307	6.4323	3.02878	5.07996	4.27797	2.37691	0.89773	4.8234	1.15709
TCGA-BR-7958-01	899	0	2.30291	7.08703	2.27754	3.52083	4.18243	5.33118	5.3503	3.72107	0.349752	2.04906	0.524438	3.74913	5.68199	3.94913	2.65901	1.42743	1.70017	3.49237	0.723744	3.1761	1.16556	1.33783	2.9989	4.42256	1.15073	3.56554	1.01296	6.0802	4.28865	2.43421	5.11842	3.69528	1.72781	3.70682	1.0675	1.75891	4.84938	4.05238	8.61847	6.54355	3.29388	4.12835	4.72859	2.43788	0.72512	4.61473	2.23733
TCGA-VQ-A91X-01	289	0	2.16616	7.08265	1.91441	3.65111	0.826548	1.68183	1.25434	0.409257	1.09697	0.24695	0.0612033	0.706527	1.24869	1.25215	1.3192	0.234065	0.140764	1.12377	0.0366936	0.729703	0.141531	0.423783	0.528032	3.33794	1.37088	1.08835	0.499846	4.17026	1.32431	0.538881	2.527	0.988074	0.225314	0.0558063	0.412888	1.02017	1.18507	1.51428	7.82908	4.27992	3.12264	4.23076	2.35112	2.23796	0.398464	0.958435	0
TCGA-CG-5726-01	881	0	2.65099	5.34413	1.79545	2.83719	1.47894	3.75932	4.41976	1.1862	0.0261349	0.289333	0.176098	1.36262	2.73476	2.34572	2.36686	0.390839	0.851458	0.724726	0.0248356	2.1172	0.0751143	0.492813	1.59898	2.71376	0.970458	1.74324	0.504518	6.32073	1.42336	2.99098	3.49398	1.80626	0.0728456	0.4872	1.22656	1.01643	3.04441	2.20915	7.4059	4.51812	2.59512	3.5692	2.95328	1.88243	0.664698	1.59088	0.773982
TCGA-CD-8534-01	201	1	3.2402	6.27772	3.49248	2.70635	2.28444	4.92297	5.10859	4.32103	0.614256	1.54801	0.570114	3.25805	6.51178	2.40703	3.34515	1.74624	2.52318	2.60181	0.802589	2.74222	1.83652	0.854199	3.23842	3.73719	1.32564	1.94034	2.03485	5.47572	3.36384	3.91235	2.8144	3.65178	0.986215	0.171981	3.65715	2.60994	5.26069	1.97099	7.59529	4.77598	2.92056	4.25373	3.84563	3.36222	1.79175	1.37288	2.55004
TCGA-VQ-A94O-01	185	1	3.32199	5.783	2.85362	3.74983	2.71192	5.50859	4.56343	0.0922492	0.168907	1.33529	0.309672	2.55157	3.14052	4.04233	4.16042	0.960368	0.531507	3.02999	0.224708	1.89036	1.24459	1.23728	2.75342	4.33317	1.33978	3.1045	0.491966	5.56512	3.89945	2.75832	5.28726	3.35703	1.06755	1.98718	2.08242	1.71348	4.08646	4.07562	7.87953	6.15242	4.00437	3.9293	5.248	4.15726	1.72744	4.67858	0.903421
TCGA-BR-7901-01	91	1	3.57369	8.02612	3.64135	3.40031	3.41331	5.83548	5.62477	5.27678	1.54696	2.03636	1.01005	3.92506	5.2314	4.40242	4.85484	2.55798	1.6311	4.57871	1.31417	2.97015	2.50996	1.4828	3.97875	5.39897	2.38561	5.14176	2.3892	7.02422	5.23199	3.84196	5.85421	4.05677	1.92614	3.90368	2.90248	2.88223	5.81527	4.48077	9.38734	6.62933	3.80459	4.66774	5.5627	2.73712	2.58438	3.79828	3.69647
TCGA-HF-7134-01	1588	0	2.29098	6.55979	3.87362	2.37096	2.58238	6.85022	5.18382	0.986676	0.142455	0.692763	0.821916	3.21797	1.63137	4.74788	3.54474	1.23626	1.19156	3.18186	0.0580729	2.29357	1.96447	1.10825	2.83929	3.82303	0.890635	3.93299	0.481431	6.55912	4.1678	0.784129	5.14613	4.13266	0.234393	0.317251	0.0908872	2.22198	5.17143	4.42345	8.70853	7.44566	3.72092	4.67583	5.7058	2.74934	2.37478	2.86131	0.0336119
TCGA-BR-7196-01	348	1	3.70091	8.10707	4.21904	3.64393	3.88488	6.54215	6.70773	4.84475	2.46571	3.5347	2.35256	4.30149	6.12162	4.75459	4.64909	3.19264	2.79966	4.75241	1.93858	4.50743	1.64248	1.61081	4.98401	5.14027	2.0675	6.23338	2.24026	7.43909	5.29717	4.42467	5.87242	4.51234	3.5256	1.71666	4.742	3.63437	6.66638	4.80853	9.57933	7.87387	3.83105	4.91916	5.44647	2.20743	2.88004	4.26845	5.85233
TCGA-D7-6526-01	523	0	1.68942	6.41574	2.89534	3.11989	2.18144	3.82644	3.46255	3.01473	0.397455	0.494339	0.180284	2.1674	5.07431	2.29814	2.06337	1.00071	0.749368	2.72053	0.617378	3.35035	2.34248	2.74045	4.46227	3.85193	2.47162	2.52248	0.993161	5.39037	2.94426	1.4691	3.47198	2.18695	0.637373	1.83104	1.09639	2.21632	3.06794	2.91308	8.21175	4.98553	3.72463	4.4894	3.52894	1.65913	0.491452	2.66574	1.09731
TCGA-CG-4469-01	215	0	1.3756	7.64845	2.28916	2.47419	2.21799	5.65245	5.31741	0.784618	0.17563	0.518524	0.383549	3.11022	3.46657	3.52871	2.20807	2.1302	0.253624	2.63895	0.186928	2.93006	3.33934	1.73773	2.07614	4.50998	1.96374	1.21363	0.286424	5.84726	3.80877	1.81353	2.59202	3.33373	1.30278	0.921636	0.241843	1.8856	4.363	3.66882	7.60214	4.62482	3.41672	4.69271	4.5842	2.38767	0.181398	1.71823	0.121956
TCGA-F1-A72C-01	343	1	2.00669	6.79644	2.33034	3.35031	2.96965	4.79855	4.36259	1.75006	0.114533	0.39819	0.3955	3.12422	3.64443	3.72546	3.00762	1.89539	0.543216	4.72621	0.685477	1.94694	0.82619	1.76577	2.13954	4.22051	1.17551	3.8101	1.06094	6.26309	4.10064	1.86915	3.26908	2.94319	3.01869	5.28033	3.2306	1.75121	4.75085	4.13153	8.46302	5.85422	2.69834	4.27892	4.42856	2.9765	0.990043	4.27358	0.792341
TCGA-BR-6707-01	426	1	1.88554	6.1249	1.85464	2.73804	3.1286	4.13868	2.94082	1.285	0.340594	2.26816	0.249878	2.82398	4.08335	3.36064	3.00897	0.539273	0.891686	2.53242	0.155512	1.52172	0.408131	0.868063	2.01502	3.81642	1.00485	2.4392	0.911383	5.29042	3.30663	1.38266	3.98082	2.60444	0.859754	2.60135	1.13831	1.08386	3.85125	3.15422	6.69622	5.66458	2.62927	3.56323	3.77747	0.649663	0.928971	2.76512	2.09895
TCGA-CD-8527-01	159	1	3.07248	7.17424	1.8872	2.71153	1.35045	3.16069	3.31628	1.58714	0.344066	0.535938	0.185838	2.90146	2.95428	2.87444	1.84098	1.59129	0.311297	2.0382	0.100238	2.28103	3.3071	0.666189	1.26392	4.1719	2.59965	1.96343	0.542895	4.22771	2.30333	2.26138	3.88309	2.55091	0.505548	3.64449	1.07548	1.7522	3.03102	1.39246	6.80931	4.7977	1.77653	3.83718	2.93911	2.37396	1.28148	2.7641	1.99769
TCGA-D7-A4YX-01	1108	0	3.20212	5.92302	1.9681	2.93003	3.31747	4.2251	3.30029	0.353714	0.0203727	1.12089	0.118823	3.18117	4.88684	3.16147	2.35437	0.588082	0.561712	2.12959	0.249891	1.40621	0.449837	0.36651	2.13471	4.06454	0.590772	1.66746	0.29771	5.95647	3.30356	1.35201	4.49977	2.28856	1.03389	2.39645	0.180985	0.974747	3.51283	3.37822	7.60077	5.52549	3.18482	3.9434	3.71326	2.75752	0.224994	2.69967	0.133435
TCGA-VQ-A91N-01	438	1	3.74753	6.03991	2.93924	3.03106	2.3475	4.52142	4.15014	1.13055	0.300084	0.653326	0.506067	2.33194	4.5035	2.54022	4.24056	1.18478	3.62708	1.42261	0.512303	1.26064	0.441349	1.04749	2.6376	3.94419	3.18977	2.76446	0.441089	5.45373	2.64887	3.64832	3.86402	2.64794	0.81166	0.244409	2.28863	1.53401	3.65588	3.04994	6.25459	4.9623	2.97399	6.91353	4.43345	3.53374	1.97099	2.48507	0.646448
TCGA-F1-6177-01	200	0	3.16578	5.12636	3.14394	2.43964	2.67608	4.60214	3.32226	1.11377	0.330113	0.384498	0.051747	1.99994	4.19471	2.99775	0.728952	1.3203	0.115411	1.10473	0.134468	1.85726	0.226981	2.02539	1.6072	3.01029	1.41667	1.77635	0.301731	5.86461	2.31484	1.67881	0.263366	2.36857	0.422152	3.48303	0.254973	2.73516	3.1851	4.45849	8.29467	5.76506	3.31985	4.45911	3.68105	3.41954	0.00680877	3.74412	0.0167521
TCGA-D7-6522-01	566	0	3.3707	7.16883	2.90248	4.1231	5.14779	5.91087	6.65917	1.07735	0.361726	2.29541	1.28802	3.87752	6.71671	3.71324	2.64964	1.50328	3.09394	3.83878	1.90326	3.41178	0.992279	2.78276	3.34093	4.42177	1.83459	2.8842	2.46386	6.93666	3.27954	4.91545	3.74742	4.28348	2.32374	2.22586	3.8268	2.52134	5.81269	3.76489	8.32345	7.26184	2.63324	4.26801	4.86512	1.12871	3.34724	4.53215	4.79297
TCGA-CG-5721-01	183	0	2.23431	7.01907	2.26075	2.99847	3.93302	4.53432	4.10966	3.29633	0.866052	1.48015	0.486409	3.46201	5.40083	2.73804	2.18006	1.05923	1.03518	2.91665	0.0961926	2.11313	0.803331	0.999858	3.08763	4.34733	1.60297	2.90462	1.33269	6.14304	3.22915	3.0191	3.59031	2.7713	0.596298	2.35124	1.38238	1.84841	4.2889	3.87942	7.76148	6.18631	2.18485	4.17876	3.64707	1.79924	0.809305	4.60917	0.642053
TCGA-D7-8576-01	204	1	3.26432	7.3597	3.37718	4.06062	3.09314	5.83332	6.11022	1.26615	0.417538	0.506001	0.491918	3.3917	5.19879	3.74277	4.00832	1.94987	0.446161	2.39872	0.705214	2.28051	2.22509	0.709592	2.99662	4.25643	1.4705	3.43419	1.49145	6.59234	3.39233	3.00631	4.76009	3.74164	1.726	0.968287	3.38334	2.38908	4.95615	3.4303	7.2758	6.19817	3.24751	4.33452	4.88397	2.05773	0.894503	2.94821	0.512194
TCGA-BR-7716-01	1210	0	3.00795	7.21005	3.28832	4.08735	2.81675	4.3804	4.60291	2.59338	0.478572	1.06182	1.31237	3.43688	4.06011	3.05973	2.96338	1.47835	1.23557	4.01362	0.593519	3.87188	1.42727	1.25849	3.59701	5.05066	3.07192	3.24348	2.02162	5.46724	3.10002	3.95702	4.99475	3.03094	0.937037	3.36913	3.37964	1.5756	4.58952	2.07556	8.80404	6.53819	3.76091	4.07069	4.67801	2.07548	1.92749	5.12244	2.20015
TCGA-D7-A4YU-01	500	0	3.44432	7.61994	3.62495	3.6749	3.14124	5.58915	5.53195	4.69135	1.21034	1.01132	0.787728	5.2882	4.88969	3.28722	4.74557	1.50208	2.62738	4.35519	0.724549	2.61081	1.55919	0.889969	4.30432	4.82101	1.87046	2.45375	2.32615	6.7786	4.37845	3.6313	4.91221	3.67417	1.75586	0.35599	1.43934	2.63359	5.03804	2.81157	8.73448	6.44421	4.03303	5.48097	4.74782	3.44222	1.59021	3.55197	1.86194
TCGA-VQ-A91Q-01	551	1	3.97767	7.06732	5.4875	3.39091	3.17307	6.37363	5.9386	1.18678	0.879715	0.561907	1.29667	4.04175	5.39228	4.43175	3.53857	2.59651	3.72443	2.77568	0.735444	3.5706	0.932566	2.35283	2.92612	4.62576	2.46166	2.45112	0.795977	7.86681	4.628	3.32066	4.44458	4.46841	1.72613	3.2659	2.07399	3.27604	5.32944	4.75097	9.42373	7.23197	2.95381	4.8513	5.77064	4.31866	2.35801	4.07702	2.62981
TCGA-BR-8486-01	615	0	2.52641	7.63949	3.46819	3.3782	3.06041	6.28204	6.04389	0.312696	1.0702	1.4252	0.348154	3.28364	5.28522	4.85944	4.68966	1.85251	0.510486	4.08329	0.912046	2.39479	0.67322	1.72826	3.28708	3.90135	2.24797	3.99722	0.897301	5.77845	4.40272	2.72843	5.18906	4.00273	1.22652	0.764964	3.07447	2.77433	5.43496	4.86565	8.95312	7.30059	3.33519	4.20585	5.54695	2.20555	1.68524	2.79864	0.846126
TCGA-VQ-AA6A-01	1184	0	2.87169	6.57624	2.92792	3.42722	2.30799	3.85855	4.1184	1.01016	0.544134	0.455275	0.203469	2.17569	2.82797	2.22536	4.03718	1.55182	2.46252	2.80164	0.21109	1.76064	1.87563	0.58966	2.24859	4.30948	2.05732	3.68327	1.39034	6.74021	2.71498	4.0232	4.33783	2.63893	0.975811	1.68058	2.3159	2.11504	3.90967	2.24818	8.78034	5.1947	4.28928	4.02752	4.12473	4.14758	2.20754	2.10641	0.819077
TCGA-VQ-A8P5-01	235	0	1.85257	6.26217	2.91597	3.04963	3.36159	4.70971	3.68449	0.992285	0.50684	0.621315	0.704295	3.35519	4.69173	3.56532	2.53982	1.25659	0.896198	2.20889	1.02974	2.24138	2.49176	1.59303	2.25328	3.86843	1.34327	3.6961	0.955741	5.36496	3.89656	2.59377	2.14303	2.88072	0.975686	5.62474	1.45891	1.96796	4.30227	4.22224	7.33191	6.27651	2.31345	4.48003	4.48081	3.02103	0.747337	4.06335	0.872044
TCGA-VQ-A94P-01	81	1	3.95789	9.33983	4.22113	3.70547	3.40072	6.55926	6.61417	7.98918	2.33058	2.30578	3.22787	5.0955	4.65839	4.12701	3.68448	3.96002	1.66708	5.77337	2.61507	5.10632	3.89213	1.93109	5.21431	5.8498	4.05595	3.19524	3.41456	7.82801	4.4736	5.00181	4.14069	6.06511	2.99485	1.17695	2.23899	3.92841	6.22772	4.42855	11.3481	6.54588	4.59649	5.99626	6.8453	4.55967	5.32531	3.02358	4.82594
TCGA-RD-A8N9-01	1083	0	3.48729	7.39766	3.66806	3.20991	5.18	6.61087	6.88235	3.27972	1.03594	1.15543	1.29556	4.13713	6.57635	4.76638	3.79809	2.6866	3.67348	3.97626	1.68868	3.39971	1.27589	1.65576	3.31246	4.74689	1.8836	3.20253	1.9453	6.8904	5.45337	4.08976	5.60837	5.17454	3.04935	2.8611	2.54883	3.05896	5.61484	4.40082	8.01473	7.4167	3.46846	4.94845	5.93655	2.93647	2.29926	3.86847	3.84234
TCGA-VQ-A91D-01	351	1	3.36353	5.49393	2.31484	2.46112	3.14395	4.48165	4.16374	1.25405	0.0531574	0.648392	0.230523	2.78199	0.667607	3.03634	1.97544	1.81862	0.317921	3.15473	0.840175	1.33749	0.362108	0.808357	1.98674	3.91167	1.08307	2.37984	2.57686	7.45632	3.74196	2.58634	0.600752	2.4942	0.95288	5.47169	0.331914	4.3265	3.73764	4.29857	8.1303	5.90014	3.26988	4.66919	4.32666	1.8181	0.0775795	4.74765	0.5796
TCGA-VQ-A8P8-01	942	0	3.01668	7.14518	3.3578	2.78429	2.90885	5.49575	5.5345	1.17558	0.839398	1.4238	1.29446	3.29667	5.56847	3.77994	4.60578	1.71689	1.58504	4.24482	0.807129	2.58612	2.29537	1.52206	3.5456	4.01974	1.78676	3.4312	1.16565	6.47633	4.37335	3.92636	4.39494	4.05679	1.84115	0.0803338	4.37654	2.53476	5.04435	3.94118	7.3825	6.16517	3.13857	4.69155	4.83697	2.85491	3.5529	2.48509	3.361
TCGA-VQ-A94U-01	819	0	3.41533	7.01668	4.14856	2.92989	3.46203	5.6369	5.65616	1.15981	1.06932	2.05051	1.48715	3.38105	6.39935	3.94536	4.56862	2.67508	1.62446	3.60719	1.56463	2.70062	1.2788	0.881858	4.14992	3.93585	1.7622	4.588	1.77401	6.65886	4.07936	3.77203	3.19476	4.32384	1.72406	0.157373	4.29148	3.76373	5.78129	3.57635	8.22585	5.77282	3.25402	5.36449	4.76762	3.15282	2.26637	2.11456	4.06665
TCGA-CG-5732-01	1949	1	2.66201	7.06466	2.1754	2.96962	2.46497	3.92166	4.42511	1.1738	0.219893	1.08413	0.323542	2.13104	4.53938	2.61303	2.67674	0.322795	1.15775	2.36586	0.119045	2.07467	0.7349	0.467477	2.00453	4.04357	1.94167	2.56082	1.02393	6.39709	1.91083	2.62048	2.92937	2.10969	0.505697	0.131954	2.16901	1.1442	3.96673	2.02686	7.2048	5.03007	2.91055	4.32515	3.03825	1.73101	2.24204	2.5967	1.4536
TCGA-HU-A4GJ-01	547	1	3.55639	6.33689	3.16607	3.51819	3.42913	4.78718	4.28142	0.527709	0.813336	0.738313	1.21937	3.73009	5.07977	3.0355	3.74645	1.19916	3.00364	4.11685	0.693595	2.52361	0.649255	1.33428	2.70775	4.46881	2.2872	3.54097	2.52964	5.10228	2.50229	3.93817	2.48205	3.1479	1.6444	0.041553	2.95134	2.33818	5.8903	2.90832	7.40987	4.86083	3.08548	4.84149	3.48413	1.52498	3.36134	2.2817	2.26668
TCGA-MX-A663-01	218	1	3.69682	7.98626	3.71986	3.75585	3.26101	6.44745	6.9637	5.48546	2.26055	2.75384	1.87152	4.28268	3.66158	4.31802	4.0629	3.09966	1.13923	4.70414	1.72073	4.51631	2.59769	2.20506	4.38851	5.06673	2.93372	3.70366	3.13738	7.51661	5.11336	4.24482	3.66435	4.68922	2.31718	3.62823	2.96357	3.40229	6.03313	4.06268	9.59508	7.38826	4.17677	5.01592	5.73303	3.30593	4.21641	4.40347	5.99385
TCGA-VQ-A928-01	148	1	5.2573	6.79505	3.74259	3.21626	4.00813	5.89331	4.90985	2.10011	0.587655	1.38196	0.637341	3.90918	5.28271	3.70614	3.62861	1.36893	5.63928	3.8461	0.773787	2.98006	0.943229	0.768383	2.60608	4.6158	2.52573	3.20265	1.23298	7.10248	4.77	3.71743	4.30023	4.14249	1.57838	4.40374	1.07218	2.89655	4.7125	5.12655	8.20813	7.47335	2.80012	5.08493	5.35071	2.40082	2.23161	4.23972	1.37255
TCGA-VQ-A91S-01	1000	0	2.17796	6.79452	3.57665	3.18448	2.07192	5.54978	4.5986	1.2763	0.273871	0.680906	2.32169	2.77295	3.08806	3.56437	4.10984	0.787179	0.370416	2.6972	0.176716	1.86865	0.482601	2.73466	4.82939	4.20812	0.854229	3.94007	0.365286	5.88443	3.08634	1.22808	4.51159	3.12269	0.787011	2.20612	1.76839	1.82525	4.65106	2.73354	8.45318	5.56696	3.38299	4.83457	4.54663	3.17358	0.466992	5.08751	1.931
TCGA-VQ-A925-01	138	1	3.03178	6.28857	3.68185	2.86546	2.62364	4.58528	4.25161	1.125	0.645421	1.3634	0.379079	2.63677	4.43835	2.66341	3.34498	2.18517	2.33558	2.51621	0.127967	4.13952	1.38483	1.45642	2.6865	3.63008	3.25648	2.1086	1.59677	6.46433	2.75946	2.62208	3.03425	3.03111	1.68399	0.89185	3.96745	3.32851	4.32708	2.73523	8.2102	5.17158	2.80024	4.44959	4.73594	1.90687	2.12028	2.30379	3.73915
TCGA-VQ-A8PK-01	263	1	2.62929	7.35855	2.57498	3.02973	3.53402	4.793	2.93729	1.07262	0.769014	0.475258	0.144402	3.68864	4.62991	4.10769	2.85563	2.59405	1.38986	2.71189	0.255319	2.36116	1.86106	1.83434	1.54566	4.73089	3.05634	3.39885	1.50529	6.57653	3.68797	2.69993	3.0908	2.97033	0.395022	3.58281	2.23014	1.97771	3.5916	4.78586	8.26573	6.26109	3.5943	4.66817	4.63218	3.32371	0.243786	4.34651	0.932833
TCGA-BR-7704-01	1072	0	2.47136	6.19616	2.38053	3.78765	3.58374	4.12283	4.46382	0.885098	0.436135	1.07956	0.161877	2.74103	5.79669	3.51861	1.86487	1.14183	0.796736	4.98175	0.61295	2.6533	0.49854	1.0437	1.88899	4.95691	0.822512	2.43311	1.10454	5.64467	3.2283	1.83396	3.72867	3.01857	0.733923	2.55312	3.93377	1.98053	4.09808	4.20512	7.90301	6.62964	2.03187	4.84316	3.91644	3.75561	0.431514	4.05182	1.05378
TCGA-HF-7133-01	1918	0	5.90118	7.65316	2.73265	3.5166	3.41188	5.82306	5.67908	2.38154	0.027995	1.54604	0.592554	3.76061	4.40778	3.73851	4.55869	1.38677	4.01612	2.90778	0.906696	5.14377	0.632212	1.04451	3.27712	4.1614	1.89161	2.94313	0.819271	7.13502	4.10348	3.15219	6.1484	3.90072	0.76506	2.0119	2.88199	1.94414	6.45858	3.45969	10.1463	6.62018	2.52434	4.98214	5.06902	2.88517	2.43202	2.46346	1.32692
TCGA-D7-6525-01	171	1	2.32673	6.90912	1.42254	3.56914	4.62095	4.35353	3.84075	2.18804	0.512845	0.783648	0.330006	2.6035	4.54966	3.04173	1.67127	0.526669	0.775165	3.05101	0.925284	2.30911	1.03748	1.26421	1.9937	4.39852	1.31856	2.21404	1.61457	6.65928	3.33464	3.56492	2.32322	2.75219	0.945153	5.40812	2.69531	1.20335	3.35062	4.3997	8.05605	8.07256	3.52396	4.5794	4.02127	2.86274	0.173834	5.10463	1.63777
TCGA-CG-5719-01	31	0	2.85007	7.39856	2.80414	3.61942	3.95376	6.32016	7.35654	3.68689	0.533718	1.00636	0.827054	3.51833	6.26008	4.60527	3.55609	2.86336	0.863616	3.7594	0.821485	3.68487	1.50774	1.1168	2.47505	4.36736	2.1719	4.3494	1.92847	6.7537	4.84042	3.15378	3.86932	4.28359	2.11085	5.64146	3.83224	2.60668	5.61296	5.42747	8.54613	7.4974	3.17225	4.11594	5.26045	1.75803	2.0874	3.86643	2.86515
TCGA-R5-A7ZF-01	259	1	2.16649	6.16643	4.23879	3.51337	1.91441	4.54605	4.27889	1.11275	0.459316	0.42664	0.360634	3.46057	2.98718	2.72326	2.31639	0.721859	0.635246	4.6171	0.594929	2.62956	2.86181	1.60082	0.711185	4.03108	1.19505	1.72533	0.509927	5.00264	2.91398	0.784326	1.2757	2.3507	0.842393	1.38256	0.88409	1.13743	3.46217	2.57164	7.68528	5.41476	2.62884	4.01103	3.51875	3.00528	0.0962301	3.14742	0
TCGA-CD-5800-01	400	0	3.35309	6.19696	1.68059	4.05153	2.76268	3.91946	4.4661	0.330457	0.652434	0.702599	0.0915296	2.36938	3.19025	3.3499	2.34422	0.875387	0.733115	2.85181	0.0739058	2.7044	1.83033	1.20418	3.55241	4.48317	2.89542	3.44275	2.71587	6.98839	2.22813	1.31767	2.95744	2.70497	0.197012	2.19992	3.52426	1.9039	3.65158	3.83709	8.85857	6.57442	2.60712	3.66709	3.78339	1.77154	0.871683	4.55274	1.46445
TCGA-BR-8295-01	67	1	1.93523	6.10233	1.75594	3.97593	1.66009	3.89069	4.1121	0.265905	0.587914	2.55806	0.554164	3.42771	1.7754	3.27898	3.10763	2.41254	0.928172	2.48026	0.293969	2.60393	1.71094	2.57633	2.55558	4.55327	3.06037	2.81211	2.31244	5.54783	5.17425	2.47232	2.56934	2.24309	0.344417	0.722738	2.45891	1.4145	3.60307	2.58841	7.71899	5.12114	1.97532	4.00064	3.35701	2.39247	0.647658	3.50615	2.9358
TCGA-BR-8369-01	419	1	3.51882	7.43919	3.33369	3.00419	2.37348	5.20712	4.79456	5.40295	1.65526	1.64209	1.49418	3.6817	3.29382	3.15293	3.29023	2.86654	1.94272	4.3937	1.0852	3.01876	2.76329	0.781092	4.49724	4.95102	2.61935	4.37969	2.76916	6.50329	5.42121	4.35373	2.87667	4.58022	1.78441	0.781748	3.93945	2.92156	5.20842	3.48185	8.96408	5.48727	4.14861	6.2508	5.14456	3.35323	3.57151	2.857	4.70473
TCGA-VQ-AA6K-01	332	1	3.42823	7.42563	3.45988	3.04603	3.07478	4.96686	3.73596	1.79819	1.35323	1.13812	0.385959	3.43317	5.80064	3.01642	2.95969	1.03188	1.61886	2.55048	0.69186	2.3637	0.706067	1.64121	2.92721	3.99188	1.34304	4.62287	1.15921	6.16042	3.66111	3.21479	3.27498	3.25648	0.81445	2.19466	3.97215	2.577	4.40495	2.24401	8.8238	6.36164	2.32347	4.41371	4.43963	1.79189	1.97099	2.72986	2.56188
TCGA-IN-7808-01	105	1	3.59788	6.17205	2.24115	3.29163	2.98657	4.02376	5.90593	1.74991	0.592702	2.33254	0.510161	3.31219	1.45079	2.62712	4.58617	1.36779	2.90145	3.07526	0.176872	4.56933	2.42002	0.180128	2.29001	4.12275	1.26224	3.34427	2.84726	4.86913	2.83685	5.21075	0.949022	2.72641	1.5885	0.128544	2.30715	2.78118	5.45809	2.1749	7.82664	3.41976	2.77993	4.52918	3.02428	3.1927	3.1442	2.38153	3.79143
TCGA-HU-A4G3-01	170	0	2.44735	6.1462	2.25596	2.51713	2.13525	4.42188	4.39343	1.07862	0.277469	0.628985	0.313854	2.52312	3.95937	2.67324	3.70845	1.15741	2.42948	1.87716	0.411012	1.74169	0.319617	0.971986	2.15068	3.12712	1.60449	2.88998	1.00409	6.24354	2.74254	3.24318	4.17048	2.78776	0.366783	0.853459	2.2034	2.12353	3.89403	2.74879	6.86005	5.25684	2.28092	3.76344	4.1101	2.09976	1.11275	1.57925	0.444926
TCGA-BR-6802-01	807	1	2.68954	6.25614	2.4517	3.37349	3.55862	5.08541	5.13999	1.25401	0.648136	1.79446	0.426573	3.46483	5.66455	3.74447	2.45125	1.66445	0.689178	2.46864	0.673393	2.1404	0.471853	0.902768	2.5371	4.2215	0.863823	3.41529	2.04504	6.50841	3.41895	2.7714	3.03837	3.07981	0.618785	4.30366	2.37165	1.87502	4.52046	4.59969	9.23083	6.78427	2.12295	4.39222	4.26278	1.38211	0.769228	4.0007	1.50364
TCGA-F1-A448-01	647	0	2.8055	6.92718	3.00163	2.38656	3.51788	6.30696	5.89088	0.794719	0.577409	0.576566	0.672096	3.42459	6.2202	4.07339	4.15955	1.53453	3.58298	3.23892	0.834122	3.15994	0.527779	2.75315	2.90702	4.8742	2.20303	4.86547	0.789208	6.48086	4.27277	3.80922	4.69693	4.08875	2.38099	1.61367	3.2895	2.38348	5.24953	4.17807	8.91242	6.93166	2.77017	4.0154	5.06925	2.26459	1.62815	4.39043	1.06477
TCGA-IN-AB1V-01	479	0	3.03367	7.37474	2.70373	2.81429	2.52003	3.41157	2.77915	3.72697	1.04688	0.8514	0.943388	3.57034	1.89191	1.30796	1.40981	0.594765	1.89988	2.42164	0.151821	3.35091	1.31865	2.33482	2.74768	3.53582	2.57753	1.37565	1.27768	6.46122	1.94606	3.84068	1.14872	2.33386	0.482516	0.179058	1.78368	2.09541	3.57571	2.38042	6.7067	4.36115	4.18127	4.50126	2.86756	2.26982	2.95437	3.15612	4.254
TCGA-IN-7806-01	1106	0	3.105	6.10013	3.55273	2.82817	1.62798	4.65301	3.39845	4.72989	1.08022	0.714795	0.736769	2.52102	1.08759	2.72871	3.13031	1.38356	1.08413	3.03612	0.21433	3.77012	1.3945	0.635803	3.17542	4.00373	1.15452	2.47105	1.15785	5.59987	3.12982	2.1769	3.93434	2.98512	0.43182	0.600743	2.2474	2.13856	4.96459	2.74614	8.52894	5.5096	4.33412	5.16362	3.70657	4.20207	1.75506	2.63157	4.1272
TCGA-BR-6801-01	1223	0	2.31121	6.15698	2.50443	2.79224	3.5205	4.07929	3.23032	5.02228	1.91528	1.31997	0.1779	2.5015	3.12826	2.74302	1.93608	0.462988	0.401268	3.41817	0.610301	2.48738	0.95724	1.96412	2.52659	4.04858	2.34327	2.04141	1.53211	5.5159	3.82211	2.46863	3.65626	3.14788	0.489401	4.20828	2.27668	1.24096	3.61207	3.39457	7.92933	6.82339	2.21548	3.64177	4.18126	2.61194	0.573514	3.06366	1.35385
TCGA-B7-5818-01	356	0	3.55939	5.41192	2.38309	3.67256	3.14583	4.03177	4.05191	2.94805	0.106037	0.882965	0.100599	2.39335	3.45197	3.30677	1.6996	0.681257	0.202854	1.6724	0.16445	2.92487	0.919838	1.2047	1.56994	4.22609	0.656908	1.61941	0.175533	5.94865	2.54963	1.57316	1.69497	2.19549	0.230026	4.13986	1.54173	0.958103	3.13837	4.77488	6.67035	6.28334	3.18047	3.5669	3.27447	0.389917	0.0300519	3.75502	0.410476
TCGA-HU-A4GP-01	273	0	2.04818	6.55359	2.70714	2.48176	1.35369	5.42503	4.78797	0.54569	0.622052	0.295588	0.450889	2.25199	4.24058	3.50444	4.36198	1.13239	0.395365	1.89692	0.227344	2.24444	0.590372	0.968723	2.43577	3.64848	1.08334	3.21593	0.598738	5.87838	2.5428	3.96062	3.61056	3.0816	0.727198	0.105968	1.9838	1.76643	4.97166	2.81907	8.70314	5.48203	2.4184	5.062	4.17596	2.65461	1.36431	2.11158	0.611646
TCGA-BR-4253-01	124	0	1.58733	7.49112	2.63857	3.53501	2.7859	5.01196	3.71823	0.882529	0.073565	0.593036	0.312073	4.12048	5.0036	3.51239	3.56114	1.52729	0.597482	2.10571	0.403801	2.32396	0.604082	0.345062	3.32407	4.70198	0.682567	2.15272	0.289084	5.37826	3.6497	2.24503	3.88227	3.21167	0.94027	2.63523	0.259019	1.89508	4.65743	3.26373	6.50736	4.78098	3.00928	4.88131	4.30741	2.19631	0.224587	2.69936	0.335026
TCGA-VQ-A8E0-01	531	1	3.30563	7.628	2.60098	3.40579	2.49503	5.64548	5.53921	1.05023	0.253192	0.541763	0.475668	3.01904	3.1715	4.00978	3.14434	1.38076	0.363498	2.06632	0.101501	1.53513	2.86872	0.65054	2.56348	3.79374	3.64086	3.83976	1.25614	4.80222	2.99501	3.6285	3.35122	3.20378	0.556827	0.3052	1.09077	2.53972	4.9031	3.33112	7.34876	6.05207	2.68219	4.31792	3.9765	2.72685	3.74946	2.41257	0.344996
TCGA-IN-A6RR-01	205	0	1.95392	7.18719	2.67186	2.73527	1.58046	4.19987	2.81651	1.22969	0.221807	0.447223	0.669153	2.22743	2.71236	3.37463	3.3263	0.590924	0.638102	1.32541	0.140921	1.76443	0.635899	1.11026	2.10736	4.73555	2.27618	3.6516	0.927656	5.59569	1.98704	3.50637	3.24084	2.98701	1.21894	0.30605	2.48339	1.89466	4.55938	1.95622	8.30164	4.37579	2.06063	3.09534	3.16682	2.94488	1.32713	2.38179	1.89883
TCGA-CG-5725-01	153	1	3.37311	6.53096	1.76116	3.0277	1.59797	4.24903	3.58915	1.99392	0.052217	1.19128	0.0825586	2.30516	3.67464	3.67464	3.31373	1.06893	0.907283	2.79213	0.189079	1.97803	1.41112	1.91997	1.57834	4.60576	4.86939	2.27103	3.40778	4.08655	2.77199	1.56209	3.34663	2.25983	0.0734212	1.1238	1.58932	0.978323	3.79062	2.99483	7.6086	7.38814	3.61601	4.02476	3.91416	0.940001	0.650429	2.33837	1.19746
TCGA-EQ-8122-01	243	0	2.87236	7.20457	3.17226	3.40084	3.28015	5.99612	5.96566	4.04575	1.43137	1.24154	0.887301	3.14387	5.46557	4.2153	3.71117	2.01262	1.02022	4.44164	0.6808	3.01712	1.63171	2.21098	2.9816	4.68187	2.16554	4.9071	1.61877	6.56148	4.33725	3.13648	4.04783	3.92464	1.35805	3.21439	2.40364	2.8627	5.29026	4.53147	9.04517	6.80996	3.31693	4.26974	5.05011	2.66921	2.72027	3.66977	1.7316
TCGA-VQ-A8E3-01	538	1	3.05805	6.12035	2.64053	3.40438	3.09979	5.4082	4.99961	1.94517	0.363144	1.73036	0.592811	2.89924	4.64665	3.69694	2.86184	1.13198	0.887436	2.15785	0.485236	1.28235	0.813978	1.24469	2.23601	4.15418	0.878736	4.17731	1.49977	6.29442	2.97944	1.85469	3.46203	3.1358	1.30958	2.33733	1.38627	1.8671	4.53606	3.76962	7.60178	5.4256	2.28814	5.06633	4.02438	3.99354	0.295947	3.99637	0.705733
TCGA-HU-8249-01	881	0	2.70354	5.68748	2.17395	3.21316	2.49656	5.08725	4.88341	2.14746	0.36169	0.943391	0.369189	2.59989	3.15778	3.98351	1.91374	0.998922	0.625655	2.25059	0.261835	3.36987	0.949367	1.12759	3.33204	3.62976	0.584471	2.70706	0.675446	4.60598	3.18955	3.85993	3.27724	2.82582	0.927661	0.787277	0.495241	1.99681	4.17205	4.1977	7.57141	5.5314	3.15189	4.03227	3.98092	2.76663	0.497421	3.36119	0.0956164
TCGA-BR-6453-01	485	0	2.76611	6.51509	2.99588	3.06101	3.52515	4.92843	6.16356	0.725372	0.442853	2.17998	1.24403	3.08867	6.54997	2.91052	2.89151	1.4157	2.7982	3.33684	1.18889	2.26472	0.771163	2.65136	2.42039	3.91192	1.30296	4.1098	1.84969	5.65708	3.17447	4.29325	3.42038	3.5221	1.69982	0.185515	3.79946	2.41008	6.03532	2.25521	8.02931	5.9254	2.40659	4.01408	3.51777	1.19897	2.82012	2.6943	4.36039
TCGA-BR-4201-01	940	0	2.24387	7.92658	2.79321	3.28918	3.71934	5.80888	5.53759	3.11333	0.928539	0.813718	1.29568	4.65919	4.52871	3.63526	3.33754	2.84936	2.10454	3.46861	2.00666	3.0534	0.999868	1.78119	3.06002	5.38804	3.02489	2.88783	1.30102	6.54184	5.15822	4.64048	2.25766	4.03493	2.99859	5.66634	1.58554	2.65864	5.27527	4.29658	7.98691	5.38933	3.23998	5.174	5.43918	2.44829	1.46855	4.05068	5.17639
TCGA-B7-A5TI-01	595	0	2.80724	7.54397	3.52771	2.99403	3.27763	5.96626	5.43953	1.57828	0.420758	1.20146	0.566552	3.3632	2.54778	4.15324	3.89476	1.86574	1.30479	4.18237	0.95901	1.98095	1.67982	0.727613	2.6537	4.65806	1.50932	5.07812	0.764974	6.11799	4.64363	3.78193	5.1937	3.89856	0.92673	4.1554	0.956748	2.54011	5.77126	4.46151	9.00935	7.08239	2.97583	4.51785	5.33142	2.58966	1.23456	3.94733	1.98163
TCGA-CD-A4MH-01	371	0	2.88548	5.3747	2.00761	2.05608	1.78028	2.81679	2.69128	0.826674	0.323298	0.492485	0.0861227	1.89171	3.21022	1.75534	2.7782	0.485034	0.875538	2.24315	0.578832	1.01521	0.235436	1.01677	2.14991	3.95468	0.849081	2.18181	1.22926	4.56602	2.56658	1.59419	3.81096	1.80011	0.762905	2.20594	2.33276	1.1554	2.68349	2.43318	6.38816	4.85493	2.91303	4.61596	3.53819	2.69865	1.89545	0.992887	1.17069
TCGA-CD-8535-01	390	0	2.6803	6.86492	2.16504	3.33768	2.35038	4.67857	2.32556	1.81622	0.540459	1.42356	0.222964	4.0422	0.0568276	3.21903	2.02476	1.42578	0.155627	4.06544	0.644027	2.98797	1.19574	0.811025	1.63722	4.64967	3.58343	1.11158	3.34405	6.88215	3.8784	1.73308	2.86706	3.2945	0.536653	3.35268	1.0266	1.39704	3.83766	3.57504	7.26751	7.23176	2.23702	4.63488	3.8146	3.78717	0.0755335	2.91038	0.0624458
TCGA-BR-8592-01	191	0	4.13922	8.44168	3.65012	3.46895	3.28061	5.75853	5.60829	7.36564	2.61386	3.2826	1.64614	4.57187	5.83381	3.35688	3.99653	2.47012	3.98441	5.06675	2.39334	4.95388	3.32746	2.59704	6.1359	5.4484	3.28662	3.94711	3.99872	7.54664	6.20644	4.25644	5.11873	5.03378	3.29739	1.37342	4.08561	3.4791	6.11181	3.62423	10.3987	6.54716	4.58327	5.40774	6.28914	3.39683	4.47447	2.6186	5.99955
TCGA-VQ-A8PH-01	377	1	2.79385	5.25494	2.15078	2.97057	2.11351	3.43073	3.25818	0.312927	0.202558	1.09221	0.0950779	2.41034	2.80821	2.70408	3.24192	0.679455	0.580788	1.88629	0.19305	1.21672	0.273012	0.354669	2.91038	4.49478	1.48129	2.10035	0.301546	4.97028	2.36574	1.67814	4.33495	2.03137	0.274578	0.780241	1.24193	0.988828	2.83552	2.17952	6.92827	4.61409	2.59422	4.61234	3.71339	2.29364	1.14172	1.41914	0.165279
TCGA-CG-4477-01	365	1	2.28049	7.65383	5.20358	3.22677	2.35764	5.18408	4.54023	2.29698	0.315464	0.841394	0.7501	4.30522	4.46811	3.43698	3.76767	1.84334	1.85793	5.33178	1.07227	3.10764	0.555393	2.44087	3.07279	4.73399	1.31218	3.35578	1.05726	5.1618	4.02334	3.36696	5.10428	3.62754	1.43371	1.72576	1.24989	1.96198	4.89229	2.8376	8.68479	4.73091	3.30181	5.30317	4.77393	1.63429	1.48893	3.22372	3.63317
TCGA-FP-8210-01	153	1	4.28929	8.03601	4.29836	3.8377	4.72201	6.76223	7.28006	6.54627	2.06041	2.49483	2.87502	4.59332	6.8177	4.0824	3.74318	3.24083	3.51638	4.81393	2.53477	3.99662	2.47255	1.42933	4.39204	4.98041	2.87943	3.89798	2.79022	7.32833	5.55424	5.25038	4.66032	5.37281	2.59701	1.02957	4.8627	3.69514	7.06284	3.42218	9.44028	7.20804	3.86033	5.0458	5.52926	3.39345	4.66975	3.21952	5.92846
TCGA-HF-7132-01	2351	0	3.45729	6.91882	3.41393	3.02659	3.67046	5.18234	4.84067	2.40746	0.612483	1.78753	0.732928	3.68424	6.37089	2.60571	3.64411	1.22193	1.97462	3.4889	0.914889	3.16637	0.624045	1.85289	3.96278	4.56266	1.32853	2.42015	2.1946	6.51733	3.31952	3.71435	4.36022	3.48725	1.53378	1.69176	3.68983	2.12362	4.5386	4.01692	8.04316	6.77878	3.52422	4.93335	4.77005	3.16349	2.57865	3.22978	3.95801
TCGA-HJ-7597-01	231	1	3.32052	7.39728	2.26094	3.87755	2.74053	4.01943	2.73082	1.0645	0.254411	1.24283	0.473057	4.33565	3.40429	2.87171	2.12864	0.496019	1.19707	2.53006	0.324086	1.9845	0.816515	1.14664	1.90635	4.55622	1.35115	3.32873	2.19693	6.95591	2.9777	3.01254	2.77526	2.29738	0.662455	2.41874	2.07108	1.45136	3.74996	3.75581	7.48087	5.63723	2.77336	4.54726	3.4232	1.34136	1.01444	3.72766	1.04416
TCGA-VQ-A91K-01	1862	0	3.25079	7.08953	2.75464	3.12886	3.4608	4.54374	4.3063	4.31644	1.03854	0.64999	0.332035	3.20568	2.4193	2.68164	1.72016	1.25544	0.456674	3.13925	0.31873	3.8243	0.992226	1.65197	3.15646	3.89576	1.45543	2.11535	2.88369	6.83592	2.94508	1.79311	3.49819	3.21057	0.528508	4.2029	1.43955	2.08273	3.65688	3.82822	8.40954	5.57739	3.41782	5.23383	4.47806	1.93262	1.36958	4.36789	0.773493
TCGA-BR-8361-01	946	0	2.33506	6.06707	2.32978	2.84659	1.55666	4.69454	2.10034	3.05545	0.0389848	1.1067	0.273949	2.93769	1.44837	3.06194	3.55684	1.70377	0.789334	3.44561	0.176433	1.1102	0.365452	0.51038	2.5469	4.23775	1.41636	3.35575	0.393574	6.07795	3.3975	0.55204	2.71325	2.72738	0.17877	2.83119	0.444027	1.3789	4.52733	2.66279	8.67256	5.83302	2.24094	4.15642	3.84192	1.05472	0.125272	5.83134	0.700637
TCGA-VQ-A94R-01	1018	1	4.34299	6.55439	3.75372	2.90897	3.92434	5.17214	5.27928	1.13716	0.975978	2.14704	0.758671	3.44602	4.17939	3.14795	3.37592	1.77191	1.44589	3.22781	1.51493	2.43197	0.932122	0.554083	3.84979	4.57998	2.27646	2.00307	2.09787	6.47189	4.79828	3.03363	5.44785	3.6632	1.21924	2.42879	3.07177	3.22923	4.77425	3.38702	6.97412	6.31422	4.22471	4.70075	5.12234	3.60407	2.53998	3.81918	4.14905
TCGA-FP-8209-01	1676	1	4.7527	8.97168	4.26195	4.26266	4.55653	6.74303	6.07361	7.28152	2.9297	3.26903	2.44802	5.35825	6.14576	3.70807	4.82405	3.43322	4.67285	6.17633	2.76292	5.50585	3.55139	1.1978	6.07572	5.81172	4.80194	5.0923	4.33726	8.066	5.86283	5.79505	5.66486	6.00658	4.00952	1.00538	2.95846	3.59926	7.34042	3.7664	11.2995	6.61912	4.94686	5.84336	7.01515	4.66602	5.82927	3.44859	6.16676
TCGA-BR-8081-01	981	0	2.97163	7.06242	2.40662	3.4126	4.48659	5.18048	5.218	1.60353	0.191316	1.16506	0.597118	3.60286	5.24009	3.518	2.71576	2.19357	1.73314	3.05385	1.23454	2.12486	0.445531	1.56564	2.43554	4.45451	0.913062	3.13468	1.3826	5.55117	3.7308	4.06653	2.94632	3.62826	1.54649	5.31616	1.50669	2.33036	4.95542	4.13199	8.08171	5.81761	2.84045	4.45688	4.62487	1.77741	1.58814	4.10718	3.84665
TCGA-FP-8211-01	413	0	2.53032	5.78456	1.93238	3.10937	2.51867	3.87256	2.7405	1.79344	0.0631497	0.808946	0.126124	2.29831	1.80411	2.72979	1.5186	0.976024	2.52575	1.42182	0.15947	2.92194	0.569502	0.429388	1.53542	3.93197	0.907421	2.55951	1.30489	6.22481	2.15982	1.87955	1.69957	2.78164	0.369108	0.190279	2.59101	1.33046	3.533	1.89787	9.10398	5.66164	1.86848	3.99555	3.13801	0.858824	1.17802	2.47161	0.829797
TCGA-HU-A4G2-01	739	0	2.67896	6.52938	2.825	2.4333	1.61411	6.1149	6.56871	0.915245	0.157588	0.916888	0.553766	3.33861	1.2224	4.37915	4.63852	3.17692	0.0730343	2.25611	0.10177	2.16273	0.814961	0.878412	2.02053	3.68149	0.841146	4.24268	0.407446	4.80507	4.06966	1.46169	4.14447	4.37226	0.954108	0.724878	0.386645	2.52873	5.59393	3.73389	7.50861	6.26072	2.85204	4.39798	5.25361	2.14227	2.39594	2.24157	0.0826807
TCGA-VQ-A92D-01	2032	0	2.86911	7.45982	3.13009	3.76909	2.94444	4.6775	4.23213	0.787786	0.0601719	1.25079	0.289019	2.299	1.40693	3.84269	2.77206	0.980348	0.191297	3.18246	0.447938	1.99276	0.558915	2.34189	1.79083	4.50915	2.21522	3.5033	0.982127	5.6548	4.40744	1.12177	4.85907	3.13221	0.428561	2.3353	1.39384	2.59879	3.81896	4.84724	9.17817	6.82586	4.03411	4.47444	5.00621	2.03052	0.195309	4.58984	0.378369
TCGA-VQ-AA6D-01	521	0	3.28513	8.12708	2.12157	2.47029	1.84654	3.66079	2.44568	0.633686	0.152059	0.521157	0.27561	3.45007	3.54661	3.32187	1.82223	1.76476	0.546033	3.23087	0.377562	1.55374	2.04633	1.45434	1.30838	4.71894	3.09975	2.20309	0.717435	7.11394	3.3373	3.75281	2.30437	3.78363	0.371739	1.72464	1.05622	1.82101	2.96637	3.6964	7.57254	5.1613	3.93853	5.03105	3.50565	2.3403	0.231231	3.46903	0.951662
TCGA-HU-8244-01	742	0	2.38034	3.98559	1.85946	1.79564	1.05272	3.27824	3.88753	1.35382	0.215128	0.225652	0.110953	0.924258	0.523937	1.76128	1.49368	0.247658	0.154271	1.697	0.0540648	1.42639	0.20219	0.425046	0.908417	2.61659	1.84368	1.75468	1.40621	3.88222	0.721268	0.540428	2.29516	1.58704	0.173205	0.0802002	0.240446	1.1008	3.14506	1.3734	6.52569	3.53236	2.70444	3.61149	2.03246	1.58677	0.360685	1.48008	0.076949
TCGA-R5-A7ZI-01	2267	0	1.84264	6.13479	1.0958	2.23292	1.9125	3.69086	3.38195	0.901529	0	0.270336	0.114805	2.24406	5.17464	2.46006	1.22217	0.759919	0.133971	0.849841	0.190293	0.956964	0.469238	0.692515	1.31321	3.45379	1.11113	2.2679	0.07582	3.35855	1.71018	0.955823	2.64828	1.97884	0.179088	0.228141	0.355033	0.898097	3.16175	2.21987	7.09009	3.86661	1.00944	3.05979	2.55067	0.829062	0.129137	2.54484	0.0206963
TCGA-CG-5724-01	122	1	1.20754	6.37705	1.69178	3.71722	4.01077	4.34419	4.18385	0.641898	0.183979	0.411929	0.229574	3.51006	3.18278	3.27008	1.08262	0.962491	0.323953	2.10308	0.210235	2.49686	0.34786	1.1029	1.19639	3.42964	0.918525	1.82998	1.69662	5.81623	3.41442	2.28344	0.430937	2.37106	0.548334	5.16036	0.449139	1.0482	3.11643	4.62578	7.94922	6.60378	1.99085	4.09053	3.92853	0.698293	0.060601	5.42636	0.338896
TCGA-F1-6874-01	440	0	3.64976	7.45757	3.24912	3.43747	3.65285	7.17534	6.66804	0.764617	0.557989	1.21484	0.747036	4.00502	3.85758	4.60163	3.72125	3.50401	0.467177	4.73764	0.603973	2.23317	1.01193	1.56267	2.99048	5.05621	1.00177	4.52696	1.66291	6.92828	5.3966	3.46587	3.78209	4.18953	2.94736	4.6152	0.646015	2.76537	5.46534	6.19601	8.65185	7.75951	4.54192	4.97367	5.83599	2.16663	0.0586173	4.07483	0.10182
TCGA-BR-8680-01	972	0	3.83799	5.22028	3.06347	3.45675	2.4505	2.40667	1.66359	3.40563	0.0823275	0.172266	0.196568	1.71452	3.74989	1.55014	1.13697	0.366643	0.616995	1.32487	0.613448	2.11456	0.27026	1.46626	3.84019	3.95843	2.52891	0.759165	0.37725	5.78988	2.38385	3.43036	2.00686	1.56433	0.540766	4.4496	1.21698	1.99796	1.60551	3.23569	8.06312	4.36252	3.13021	4.59856	3.21408	0.902632	0.196437	3.18186	0.0749871
TCGA-VQ-A8PM-01	57	1	3.52312	7.04932	3.62864	2.7006	2.94999	5.74416	4.81833	1.05904	0.142122	0.861948	0.554551	3.61546	6.07621	3.89113	4.6607	1.45973	1.42611	2.84624	0.420111	2.10927	1.38501	1.39465	3.5799	4.46908	1.38499	4.47694	1.57858	5.73534	3.77169	3.11066	3.82527	3.4792	1.34472	0.672525	3.2164	2.24507	5.17819	3.76468	7.62596	6.28135	3.31166	4.86019	5.1346	3.00882	2.83653	1.97357	1.48026
TCGA-RD-A8N4-01	2171	0	3.77889	8.93293	3.62817	3.35104	1.98293	5.13993	3.20782	7.97718	4.57187	3.79806	1.32097	4.35033	5.97902	2.5937	3.71109	2.83963	1.05481	5.27239	1.69542	5.65435	3.64632	1.36908	4.95997	5.66376	4.06004	1.78495	4.29787	7.69153	2.99204	4.04106	3.35038	5.53302	1.64726	0.456961	1.13152	2.87154	5.60124	2.63219	10.9454	4.92576	4.29746	5.7611	6.09989	3.72924	6.01906	2.41007	4.12212
TCGA-BR-8590-01	223	1	3.49147	7.88403	3.86957	4.10283	4.09767	5.54842	4.80563	5.28428	1.82255	1.59226	1.61431	4.41127	4.67342	3.10494	3.86593	2.18282	3.08975	4.37949	1.46522	3.47473	2.5307	1.39515	4.4524	5.17326	3.23742	3.9718	2.56674	6.78794	5.7387	4.14703	6.36833	4.36944	2.36752	3.7645	3.63432	2.71484	5.54608	3.80565	9.22481	6.76158	3.92586	4.53242	5.64783	3.20635	3.83424	3.85219	5.24227
TCGA-BR-8384-01	113	0	4.586	9.08833	4.37331	3.84942	3.86275	6.66596	5.38717	7.78776	3.27978	3.23867	2.02622	5.04813	3.86811	3.43845	4.62676	3.34796	4.96361	5.55744	2.21329	5.11077	4.58236	2.4937	6.38996	6.2664	4.30783	4.41559	3.90751	8.03118	6.67605	5.22585	5.39859	5.78849	3.36796	1.09823	2.67921	3.69522	6.65241	3.86436	10.906	6.30913	4.86364	5.82142	6.65444	4.50131	5.77115	3.11488	6.82675
TCGA-D7-6524-01	543	1	2.92856	7.91167	3.6729	3.88287	5.01889	7.02334	7.85013	1.16231	0.857184	1.27477	0.82559	4.26721	7.83032	4.94166	5.27861	3.00931	0.474993	4.4167	1.78063	4.184	1.6916	1.81991	4.0155	4.86152	1.94543	4.44759	1.24892	7.741	5.41801	4.20299	5.43759	5.1434	3.62297	0.249532	6.12879	3.31353	5.85588	6.31287	9.03905	8.51799	3.29711	4.79913	6.56296	2.47132	1.38545	4.89115	3.02769
TCGA-KB-A93H-01	1145	0	2.42021	4.99957	2.251	2.08842	0.617006	2.81947	1.80424	0.311392	0.0432939	0.829586	0.0232216	1.19285	1.95071	2.46668	2.22519	0.158322	0.332315	1.08726	0.0712665	1.61516	0.146495	0.628357	0.641872	4.67415	0.895643	1.88532	0.445467	4.90963	1.69456	2.33345	3.06489	1.70155	0.164565	0.558327	0.228708	1.18328	2.4466	1.66441	7.23112	3.83173	2.67073	3.42758	2.52409	3.28448	0.0594081	1.4645	0.115073
TCGA-VQ-A8E7-01	1048	1	2.58368	7.54251	3.14065	3.18235	2.40606	5.2077	4.49604	0.646231	0.544894	0.43275	0.583476	2.4231	3.38621	3.59376	3.51785	1.54426	0.397231	2.5508	0.889531	2.93239	0.259792	2.25632	2.31013	3.88747	1.06534	3.5678	1.10089	5.54823	3.22553	2.22241	3.59598	3.44679	0.892627	1.08476	1.79117	1.93525	4.52207	3.67607	8.05359	6.19512	3.61108	4.45886	4.48667	2.56833	0.580571	3.43251	2.71258
TCGA-BR-8682-01	991	0	3.92952	7.5569	3.89559	3.25668	3.48994	5.74892	5.23251	5.71424	2.03933	2.53548	1.423	3.9511	5.23029	2.66311	4.45269	2.11959	2.49213	4.60849	1.96973	3.7146	1.75483	2.04529	4.61147	4.93351	2.94769	2.68358	2.42021	6.99737	4.56383	4.78291	4.71244	4.56509	2.51189	0.942609	2.66116	2.92462	5.33538	3.67353	8.9797	6.55107	4.50781	4.99856	5.51639	2.91772	3.71757	2.58715	5.74185
TCGA-HU-8602-01	679	0	3.64143	6.85618	1.97525	3.47655	3.51353	6.30089	5.36007	1.40398	0.0260821	0.696477	0.376276	3.6841	2.49862	3.79765	1.19081	2.96174	1.04866	3.05556	0.187295	1.9357	0.377045	0.756202	2.51192	4.094	1.42207	3.96009	0.207567	7.22431	4.1005	2.50753	1.15192	3.51656	1.14365	4.88981	0.310382	2.13575	4.87472	5.07505	8.65589	6.46253	4.08023	5.13543	5.21344	2.0601	0.318124	4.54159	0.169033
TCGA-CD-5804-01	368	0	2.04272	7.63482	2.69472	3.43223	2.3637	5.03579	4.80458	4.21215	0.373741	1.12753	0.619245	3.00234	2.59622	3.74399	2.97694	1.97379	0.413476	3.99282	0.587489	2.75785	1.52796	1.4185	2.93445	3.92532	2.26527	3.13032	1.62564	6.01819	3.36442	2.87716	3.68714	3.94496	0.595955	4.15577	1.87269	2.33197	4.76947	3.43848	8.34691	6.52526	2.14741	3.6891	4.51413	1.76823	1.58161	3.42027	1.21759
TCGA-CD-5798-01	408	0	2.65834	7.69308	2.33721	3.64875	4.3702	5.04081	5.21074	7.15101	0.835363	1.36376	1.02719	4.13626	5.19586	3.58747	2.35912	2.07099	0.783869	4.79317	1.00534	3.74275	2.18718	1.69015	3.73441	5.1898	2.67971	3.14652	3.13777	6.80628	4.32577	3.76716	3.60776	4.75869	1.28941	4.71163	3.00047	1.76141	4.51767	4.37404	10.158	6.81058	2.94311	4.79828	5.51966	2.3091	2.37476	4.83143	3.07815
TCGA-D7-A6EV-01	342	0	2.02979	7.37508	2.47309	3.52336	2.41131	3.95672	3.76374	0.842891	0.278897	0.22986	0.155223	2.59099	3.74484	2.62038	1.72803	0.659918	1.17259	2.10747	0.308881	1.86161	3.34182	0.833415	1.53236	4.77101	2.17956	2.40589	0.752589	6.717	2.25203	2.92855	1.87571	2.44673	1.0796	2.62391	1.68023	1.43821	3.13595	4.35884	7.35809	5.51027	3.32236	5.34773	3.73522	3.03202	0.239741	3.3808	1.63073
TCGA-HU-A4GT-01	198	0	2.06093	6.95346	2.81352	2.22806	2.14195	4.12258	3.73577	1.14624	0.03752	0.353216	0.0915193	1.88066	3.43944	2.63808	2.07766	0.405508	0.442723	1.33998	0.129416	1.36601	0.0757676	1.10317	0.887723	3.5309	1.32198	2.59831	0.392734	4.80031	2.413	2.06974	3.86962	2.24729	0.641397	1.7822	1.0632	1.06684	3.43862	2.94754	7.3376	4.5362	2.59175	4.51144	3.13311	1.82624	0.254231	2.31964	0.112084
TCGA-KB-A93G-01	613	0	3.56819	8.14447	4.25747	3.83205	5.84149	7.83229	6.20981	0.768029	1.80995	1.02136	1.18654	4.71638	8.44588	5.28197	4.31313	2.69625	3.70304	5.18728	2.99242	6.36779	2.29301	2.75039	3.78513	7.00714	1.99114	5.83963	2.67997	7.83896	5.67902	6.69785	2.68718	5.59712	3.87362	6.18316	3.7255	4.23398	6.4308	6.85407	10.1399	8.24788	3.85834	4.92299	6.8709	3.75157	1.01237	6.41166	3.2153
TCGA-RD-A8N1-01	3519	0	3.46215	6.44615	3.30528	3.10088	3.552	5.10954	4.98054	1.13059	0.864385	1.54419	1.1237	3.55997	5.00161	3.1341	2.97672	2.14654	3.32401	4.33022	0.668205	2.7211	1.57828	2.79719	3.49778	4.54372	1.75559	3.97455	1.46691	6.24136	3.65604	3.93912	3.9466	3.64264	1.47158	1.51413	4.0658	2.54125	5.18529	2.95854	8.49849	5.50517	3.08493	4.53563	4.55443	3.00425	2.9846	3.18262	4.17676
TCGA-CG-5723-01	3196	0	2.03623	7.30846	1.71486	2.9522	3.06957	4.11281	3.87482	3.17287	0.0912516	0.708909	0.687551	3.33306	5.87137	2.84645	1.68979	1.34502	1.60899	2.42661	0.581264	2.31757	0.786927	1.81941	2.00471	4.35278	3.41433	1.73408	0.310331	5.72383	3.15842	4.33267	2.50998	2.63126	0.714811	2.43378	1.1553	0.770803	3.53378	3.04015	7.86279	4.43574	1.84438	4.29039	3.2361	1.86616	0.536557	3.80257	2.23949
TCGA-D7-6528-01	463	0	2.40548	5.82146	3.14572	3.22533	1.73351	4.31928	3.65116	0.686244	1.07584	0.52111	0.222689	1.73494	2.16693	3.23881	1.34377	1.1591	0.137098	2.25393	0.213445	1.92672	0.361382	1.66095	1.16385	3.98485	1.27423	1.67572	0.62394	5.37622	3.09663	1.53479	0.770715	2.71282	0.23967	3.69746	0.495902	1.53097	2.86069	4.73305	8.46273	6.27281	2.21072	5.23971	3.54882	3.42516	0.0653381	3.41223	0.080237
[truncated: 172 more columns]
