# Supplementary material for: Comprehensive Molecular Characterization and Identification of Prognostic Signature in Stomach Adenocarcinoma on The Basis of Energy-Metabolism-Related Genes
Source: Research Square preprint supplement (doi:10.21203/rs.3.rs-138125/v1), 2021-01-14
Supplement: Supplementary file 9 [file 06d448c2bff01c2216c14724.xlsx]

## Sheet: S12_table
Supplementary Table 6. The top hub genes identified by the Degree, Closeness and Betweenness
Node_name	MCC	DMNC	MNC	Degree	EPC	BottleNeck	EcCentricity	Closeness	Radiality	Betweenness	Stress	ClusteringCoefficient
TRIM6	1	0	1	1	8.488	1	0.10338	152.113	7.64969	0	0	0
METTL7A	6	0.46346	3	3	4.476	1	0.10338	146.844	7.50487	0	0	1
YPEL5	6	0.46346	3	3	4.038	1	0.10338	146.844	7.50487	0	0	1
FLNC	1	0	1	1	16.51	1	0.1163	188.727	8.44212	0	0	0
SNURF	1	0	1	1	6.805	1	0.10338	172.085	8.19346	0	0	0
SH3D19	24	0.56839	4	4	39.227	1	0.10338	190.768	8.44758	0	0	1
NFIC	1	0	1	1	4.624	1	0.10338	165.278	8.01721	0	0	0
FAM114A2	40320	0.8164	8	8	75.749	1	0.1163	224.72	8.93807	0	0	1
TGFB1I1	1	0	1	1	13.824	1	0.1163	181.027	8.33555	0	0	0
SYNE1	1	0	1	1	1.995	1	0.09304	140.385	7.35868	0	0	0
TUB	1	0	1	1	7.542	1	0.10338	159.237	7.87785	0	0	0
NPR1	1	0	1	1	1.661	1	0.08458	114.284	6.27113	0	0	0
TRIM3	1	0	1	1	8.507	1	0.10338	152.113	7.64969	0	0	0
ARHGAP10	6	0.46346	3	3	16.001	1	0.10338	173.837	8.09919	0	0	1
PDLIM7	1	0	1	1	6.701	1	0.10338	162.818	7.98579	0	0	0
RGL1	1	0	1	1	1.636	1	0.09304	135.687	7.19746	0	0	0
GLIPR1	7	0.46346	3	4	16.589	1	0.10338	171.998	8.07596	137.66	618	0.5
SMARCD3	5	0	1	5	8.992	2	0.10338	172.356	8.12651	1641.81	9488	0
SYDE2	6	0.46346	3	3	16.968	1	0.10338	173.837	8.09919	0	0	1
ARSB	3	0.30779	2	3	15.072	2	0.10338	176.866	8.13334	640.979	4376	0.33333
THBS3	1	0	1	1	14.979	1	0.1163	186.163	8.4107	0	0	0
DOK5	1	0	1	1	5.92	1	0.10338	162.818	7.98579	0	0	0
TNRC6C	32	0.36588	7	7	22.343	3	0.1163	191.292	8.44622	1129.06	9952	0.47619
ABCA1	2	0	1	2	13.487	3	0.1163	188.218	8.50497	687.675	3236	0
MMP11	1	0	1	1	12.042	1	0.1163	170.532	8.10192	0	0	0
MICAL2	1	0	1	1	2.551	1	0.10338	149.356	7.61963	0	0	0
WTIP	1	0	1	1	1.674	1	0.09304	137.76	7.28216	0	0	0
CYB5R3	2	0.30779	2	2	15.61	1	0.10338	176.199	8.13061	0	0	1
THRB	1	0	1	1	14.547	1	0.1163	197.746	8.61017	0	0	0
CACNA1H	1	0	1	1	8.684	1	0.10338	152.113	7.64969	0	0	0
ST3GAL3	8	0.46346	3	5	16.705	3	0.1163	168.431	7.96393	1168.85	13072	0.4
REEP2	1	0	1	1	7.589	1	0.10338	144.899	7.43792	0	0	0
PGM5	1	0	1	1	10.011	1	0.1163	156.275	7.73986	0	0	0
GPLD1	40320	0.8164	8	8	8.826	1	0.1163	157.537	7.69614	0	0	1
RASIP1	1	0	1	1	1.719	1	0.09304	136.569	7.17286	0	0	0
PMP22	1	0	1	1	13.146	1	0.1163	180.923	8.26724	0	0	0
CYP2U1	1	0	1	1	1.089	1	0.00205	1.5	0.01228	0	0	0
THBS4	1	0	1	1	14.343	1	0.1163	186.163	8.4107	0	0	0
NPTN	1	0	1	1	2.263	1	0.09304	136.569	7.17286	0	0	0
SPRY1	1	0	1	1	5.836	1	0.10338	156.255	7.76855	0	0	0
ROR1	1	0	1	1	2.733	1	0.09304	143.129	7.42562	0	0	0
LPPR4	1	0	1	1	1.347	1	0.09304	111.71	6.15773	0	0	0
RPS6KA2	1	0	1	1	1.101	1	0.09304	129.441	6.99252	0	0	0
PTPRM	1	0	1	1	5.334	1	0.10338	162.228	7.95163	0	0	0
LPPR2	1	0	1	1	1.185	1	0.09304	111.71	6.15773	0	0	0
TCEAL7	1	0	1	1	1.082	1	0.00205	1.5	0.01228	0	0	0
PBX3	1	0	1	1	1.103	1	0.07754	102.515	5.65358	0	0	0
STOM	40350	0.57691	11	11	54.158	5	0.1163	208.315	8.69214	1707.35	37844	0.61818
PRCP	6	0.46346	3	3	16.438	1	0.10338	170.548	8.0582	0	0	1
CNN1	1	0	1	1	12.428	1	0.1163	158.125	7.83413	0	0	0
TMEM55A	1	0	1	1	6.034	1	0.10338	162.228	7.95163	0	0	0
HSPB2	1	0	1	1	4.49	1	0.10338	161.087	7.91884	0	0	0
DOK6	1	0	1	1	3.742	1	0.10338	162.818	7.98579	0	0	0
DPT	1	0	1	1	12.028	1	0.1163	165.242	7.92567	0	0	0
ITIH3	6	0.46346	3	3	1.312	1	0.00546	3	0.0091	0	0	1
RARRES2	6	0.46346	3	3	1.346	1	0.00546	3	0.0091	0	0	1
PLEKHG2	6	0.46346	3	3	15.241	1	0.10338	173.837	8.09919	0	0	1
PYGO1	2	0.30779	2	2	1.606	1	0.09304	130.552	6.97202	0	0	1
GPIHBP1	40320	0.8164	8	8	8.03	1	0.1163	157.537	7.69614	0	0	1
SESN3	6	0.46346	3	3	1.507	1	0.08458	100.867	5.3612	0	0	1
ARHGAP31	6	0.46346	3	3	14.587	1	0.10338	173.837	8.09919	0	0	1
COX7A1	1	0	1	1	1.085	1	0.00273	1	0.00819	0	0	0
COX4I2	1	0	1	1	1.085	1	0.00273	1	0.00819	0	0	0
RSPO1	2	0.30779	2	2	1.388	1	0.08458	110.87	6.09215	0	0	1
PTPRB	40346	0.73986	9	11	49.435	2	0.1163	208.982	8.69761	3120.5	44964	0.56364
SLC25A4	1	0	1	1	1.094	1	0.00273	1	0.00819	0	0	0
SLC25A12	1	0	1	1	1.094	1	0.00273	1	0.00819	0	0	0
THSD7A	6227020800	0.9963	13	13	26.912	1	0.10338	150.74	7.36824	0	0	1
KLHL5	9.22337e+13	1.16463	22	22	19.298	1	0.10338	149.619	7.20429	1.42857	20	0.96537
AP1M1	40351	0.59388	11	12	68.301	2	0.1163	218.415	8.85336	1922.57	24898	0.5303
DSTN	1	0	1	1	5.309	1	0.10338	163.64	7.97759	0	0	0
GPR124	2	0.30779	2	2	28.694	1	0.1163	191.744	8.47628	0	0	1
RSPO2	2	0.30779	2	2	1.199	1	0.08458	110.87	6.09215	0	0	1
RSPO3	3	0.30779	2	3	3.245	3	0.09304	133.362	7.01984	2716	15032	0.33333
PPAPDC1A	2	0.30779	2	2	1.254	1	0.09304	112.21	6.1591	0	0	1
FBXO31	9.22337e+13	1.16463	22	22	19.267	1	0.10338	149.619	7.20429	1.42857	20	0.96537
KCTD7	9.22337e+13	1.16463	22	22	19.68	1	0.10338	149.619	7.20429	1.42857	20	0.96537
JDP2	1	0	1	1	10.335	1	0.1163	175.065	8.19756	0	0	0
FBXL5	9.22337e+13	1.16463	22	22	19.513	1	0.10338	149.619	7.20429	1.42857	20	0.96537
TCEAL1	2	0	1	2	1.165	3	0.00409	2	0.01432	2	2	0
TCEAL4	1	0	1	1	1.091	1	0.00205	1.5	0.01228	0	0	0
TIMP3	6	0.46346	3	3	1.306	1	0.00546	3	0.0091	0	0	1
CLEC3B	6	0.46346	3	3	1.32	1	0.00546	3	0.0091	0	0	1
GPR68	9.22337e+13	1.19074	22	22	144.408	5	0.1163	225.146	8.88479	72.5424	9932	0.98701
OMD	12	0.47366	4	4	12.155	1	0.1163	156.426	7.68658	15.5825	82	0.83333
PTX3	8	0.37893	4	4	14.311	2	0.1163	184.044	8.36014	1199.64	11084	0.66667
CDS2	2	0.30779	2	2	1.231	1	0.09304	112.21	6.1591	0	0	1
LRP12	24	0.56839	4	4	33.069	1	0.10338	182.323	8.26451	0	0	1
CD93	40344	0.73986	9	9	52.137	1	0.1163	207.315	8.68941	905.624	27668	0.86111
MAF	2	0.30779	2	2	9.403	1	0.10338	174.968	8.23581	0	0	1
P2RY14	9.22337e+13	1.20641	22	22	144.944	1	0.1163	211.587	8.66755	0	0	1
PDLIM4	1	0	1	1	3.404	1	0.09304	139.94	7.25757	0	0	0
ACKR3	9.22337e+13	1.20641	22	22	142.337	1	0.1163	211.587	8.66755	0	0	1
CDH6	6	0.46346	3	3	3.799	1	0.10338	148.024	7.56088	0	0	1
FAM13B	6	0.46346	3	3	14.381	1	0.10338	173.837	8.09919	0	0	1
LRIG1	1	0	1	1	12.89	1	0.1163	174.78	8.19073	0	0	0
CASQ2	1	0	1	1	1.496	1	0.09304	119.926	6.56624	0	0	0
CLDN5	1	0	1	1	2.943	1	0.10338	147.024	7.55815	0	0	0
ZBTB16	9.22337e+13	1.16463	22	22	19.379	1	0.10338	149.619	7.20429	1.42857	20	0.96537
ADAMTS8	6227020800	0.9963	13	13	27.477	1	0.10338	150.74	7.36824	0	0	1
ASB16	9.22337e+13	1.16463	22	22	20.126	1	0.10338	149.619	7.20429	1.42857	20	0.96537
PRELP	12	0.47366	4	4	13.091	1	0.1163	156.426	7.68658	15.5825	82	0.83333
APLNR	9.22337e+13	1.16218	23	23	140.963	1	0.1163	215.504	8.7181	22.76	640	0.94862
PDLIM5	1	0	1	1	1.647	1	0.09304	140.358	7.2726	0	0	0
TNN	1	0	1	1	13.849	1	0.10338	165.752	7.92021	0	0	0
SEMA6B	1	0	1	1	1.774	1	0.09304	138.998	7.22751	0	0	0
MAP3K12	1	0	1	1	3.622	1	0.10338	161.087	7.91884	0	0	0
CHN1	6	0.46346	3	3	15.016	1	0.10338	173.837	8.09919	0	0	1
CHSY3	120	0.64826	5	5	36.984	1	0.1163	175.032	8.05547	0	0	1
ACKR1	2	0.30779	2	2	10.751	1	0.10338	168.925	8.09099	0	0	1
TTBK2	6	0.46346	3	3	7.93	1	0.1163	171.885	8.13881	0	0	1
CC2D2A	6	0.46346	3	3	8.447	1	0.1163	171.885	8.13881	0	0	1
MXRA8	9.22337e+13	1.14582	19	19	133.564	1	0.1163	221.587	8.80145	0	0	1
SCUBE2	1	0	1	1	1.211	1	0.08458	122.039	6.68921	0	0	0
NCALD	4	0.30779	2	4	3.466	2	0.10338	155.924	7.71664	631.615	2584	0.33333
SEMA5B	6227020801	0.9963	13	14	27.631	1	0.10338	160	7.59777	2900.41	10164	0.85714
CTHRC1	1	0	1	1	2.667	1	0.09304	143.129	7.42562	0	0	0
VLDLR	2	0	1	2	14.557	2	0.1163	198.413	8.6129	678	8374	0
ATP2B4	1	0	1	1	1.099	1	0.08458	114.534	6.27386	0	0	0
ISLR	9.22337e+13	1.1239	18	18	129.142	1	0.13292	224.312	8.89982	0	0	1
THSD1	6227020800	0.9963	13	13	28.198	1	0.10338	150.74	7.36824	0	0	1
SPON2	6227020800	0.9963	13	13	29.034	1	0.10338	150.74	7.36824	0	0	1
GJA1	1	0	1	1	8.752	1	0.1163	164.144	7.95983	0	0	0
TBC1D1	6	0.46346	3	3	1.554	1	0.08458	100.867	5.3612	0	0	1
RASD2	1	0	1	1	1.083	1	0.00273	1	0.00819	0	0	0
CD248	1	0	1	1	1.083	1	0.00273	1	0.00819	0	0	0
TACR2	9.22337e+13	1.19074	22	22	141.118	1	0.1163	225.146	8.88479	72.5424	9932	0.98701
GPR176	6227020800	0.9963	13	13	99.231	1	0.10338	192.249	8.37654	0	0	1
HECTD2	9.22337e+13	1.18699	21	21	19.462	1	0.10338	149.119	7.20292	0	0	1
GPR17	9.22337e+13	0.94663	38	38	161.555	7	0.1163	241.361	9.02005	802.173	29278	0.65292
RNF217	9.22337e+13	1.18699	21	21	18.315	1	0.10338	149.119	7.20292	0	0	1
NMUR1	9.22337e+13	0.94663	38	38	160.967	2	0.1163	241.361	9.02005	802.173	29278	0.65292
SFRP2	2	0.30779	2	2	3.731	1	0.09304	134.906	7.09225	0	0	1
ARHGAP29	7	0.46346	3	4	14.792	2	0.10338	174.504	8.10192	1360	14016	0.5
SPON1	6227020800	0.9963	13	13	25.367	1	0.10338	150.74	7.36824	0	0	1
PAPLN	1	0	1	1	15.047	1	0.1163	168.954	8.05137	0	0	0
ADAMTS10	6227020800	0.9963	13	13	28.504	1	0.10338	150.74	7.36824	0	0	1
ARHGEF25	9.22337e+13	1.16682	20	20	138.03	1	0.1163	200.323	8.47764	0	0	1
PRKD1	1	0	1	1	13.084	1	0.1163	175.982	8.20439	0	0	0
RGMA	12	0.47366	4	4	17.11	2	0.10338	164.652	7.88605	451.333	8298	0.83333
TLL1	5065	0.76834	7	12	89.928	4	0.1163	189.223	8.27817	1742.37	85174	0.40909
ADAMTS7	6227020800	0.9963	13	13	26.535	1	0.10338	150.74	7.36824	0	0	1
CDH11	6	0.46346	3	3	3.414	1	0.10338	148.024	7.56088	0	0	1
CDH13	6	0.46346	3	3	3.727	1	0.10338	148.024	7.56088	0	0	1
CHST7	24	0.56839	4	4	33.564	1	0.1163	174.532	8.0541	0	0	1
ARHGAP20	6	0.46346	3	3	16.605	1	0.10338	173.837	8.09919	0	0	1
TCF4	3	0.30779	2	3	6.807	5	0.10338	167.173	8.04044	492.279	2992	0.33333
RBPMS	1	0	1	1	7.805	1	0.10338	165.592	8.01038	0	0	0
QKI	40321	0.8164	8	9	76.321	2	0.1163	225.22	8.93944	1360	8092	0.77778
AOC3	1	0	1	1	1.094	1	0.00273	1	0.00819	0	0	0
ALDH1A3	1	0	1	1	1.094	1	0.00273	1	0.00819	0	0	0
SOX17	1	0	1	1	1.106	1	0.08458	108.964	6.04433	0	0	0
HSPA12B	6	0.46346	3	3	2.954	1	0.09304	141.385	7.36141	0	0	1
RASGRF2	10	0.32413	5	5	19.399	3	0.10338	182.452	8.25631	945.612	6610	0.5
OSBPL1A	1	0	1	1	2.199	1	0.09304	146.459	7.52126	0	0	0
RAB12	720	0.71324	6	6	2.947	1	0.09304	142.684	7.2808	0	0	1
SEC23A	3	0.30779	2	3	11.092	3	0.1163	172.027	8.13471	1327.65	8382	0.33333
COPZ2	4	0.30779	2	4	3.735	1	0.10338	162.778	7.91748	848.06	3240	0.33333
ADAM19	1	0	1	1	1.418	1	0.09304	126.984	6.87092	0	0	0
PHF21A	1	0	1	1	2.61	1	0.10338	148.448	7.56908	0	0	0
LEPREL1	9.22337e+13	1.26073	25	25	146.037	1	0.1163	188.904	8.20849	0	0	1
MAPT	1	0	1	1	1.317	1	0.09304	136.056	7.18653	0	0	0
CCL11	19	0.32929	7	8	66.875	2	0.1163	213.368	8.80691	1574.92	15824	0.32143
HYAL2	2	0	1	2	2.761	1	0.10338	149.544	7.58411	18.6319	106	0
RAB25	720	0.71324	6	6	3.442	1	0.09304	142.684	7.2808	0	0	1
FBXL22	9.22337e+13	1.16463	22	22	19.704	1	0.10338	149.619	7.20429	1.42857	20	0.96537
FBXL7	9.22337e+13	1.16463	22	22	20.017	1	0.10338	149.619	7.20429	1.42857	20	0.96537
GPR4	9.22337e+13	1.19074	22	22	141.745	1	0.1163	225.146	8.88479	72.5424	9932	0.98701
EDNRB	9.22337e+13	1.03788	26	26	150.831	2	0.1163	228.313	8.90938	192.064	13520	0.81231
ADAMTSL3	6227020800	0.9963	13	13	27.243	1	0.10338	150.74	7.36824	0	0	1
AVPR1A	9.22337e+13	1.19074	22	22	145.74	1	0.1163	225.146	8.88479	72.5424	9932	0.98701
CILP	1	0	1	1	13.497	1	0.1163	175.982	8.20439	0	0	0
SPSB1	9.22337e+13	1.16463	22	22	19.142	1	0.10338	149.619	7.20429	1.42857	20	0.96537
CAB39L	6	0.46346	3	3	1.585	1	0.08458	100.867	5.3612	0	0	1
ADAMTS9	6227020800	0.9963	13	13	29.506	1	0.10338	150.74	7.36824	0	0	1
COL4A4	9.22337e+13	1.05903	33	33	156.627	23	0.13292	235.976	8.97359	2828.87	124114	0.76515
ARHGAP22	6	0.46346	3	3	12.553	1	0.10338	173.837	8.09919	0	0	1
DSEL	24	0.56839	4	4	38.333	1	0.1163	174.532	8.0541	0	0	1
APBA2	2	0.30779	2	2	1.479	1	0.08458	124.192	6.66462	0	0	1
ISL1	2	0.30779	2	2	3.535	1	0.09304	139.315	7.29993	0	0	1
EPAS1	4	0	1	4	5.787	8	0.10338	175.399	8.21122	6446.24	37564	0
CITED2	2	0	1	2	3.7	1	0.10338	153.246	7.69887	31.8333	108	0
RAB2B	720	0.71324	6	6	3.745	1	0.09304	142.684	7.2808	0	0	1
CSGALNACT2	120	0.64826	5	5	35.977	1	0.1163	175.032	8.05547	0	0	1
OPN1SW	2	0.30779	2	2	30.945	1	0.10338	178.749	8.20986	0	0	1
ADAMTS12	6227020800	0.9963	13	13	26.567	1	0.10338	150.74	7.36824	0	0	1
LEPREL2	9.22337e+13	1.26073	25	25	146.405	1	0.1163	188.904	8.20849	0	0	1
STAB1	1	0	1	1	11.777	1	0.1163	168.954	8.05137	0	0	0
HSPA12A	6	0.46346	3	3	2.792	1	0.09304	141.385	7.36141	0	0	1
ASPN	2	0.30779	2	2	24.672	1	0.13292	180.029	8.2891	0	0	1
ST5	1	0	1	1	1.166	1	0.08458	116.41	6.35447	0	0	0
COL21A1	9.22337e+13	1.26835	27	27	150.077	1	0.1163	189.904	8.21122	0.62121	14	0.98006
S1PR3	9.22337e+13	1.13061	24	24	145.081	1	0.1163	212.587	8.67028	28.8698	630	0.90942
STON1	87178291200	1.02476	14	14	91.26	1	0.1163	211.456	8.72084	0	0	1
PLCD4	2	0	1	2	6.378	1	0.10338	163.144	7.9571	177.146	9368	0
CCNA2	1	0	1	1	5.551	1	0.10338	165.904	8.04727	0	0	0
EHD2	1	0	1	1	1.089	1	0.00273	1	0.00819	0	0	0
EHBP1	1	0	1	1	1.089	1	0.00273	1	0.00819	0	0	0
HTR2A	9.22337e+13	1.19074	22	22	142.884	1	0.1163	225.146	8.88479	72.5424	9932	0.98701
PRSS23	9.22337e+13	1.14582	19	19	125.689	1	0.1163	221.587	8.80145	0	0	1
REEP1	1	0	1	1	9.549	1	0.10338	144.899	7.43792	0	0	0
PDE5A	2	0	1	2	3.279	2	0.09304	139.059	7.20019	1360	15152	0
ADAMTS1	6227020800	0.9963	13	13	28.734	1	0.10338	150.74	7.36824	0	0	1
ADAMTSL1	6227020800	0.9963	13	13	26.57	1	0.10338	150.74	7.36824	0	0	1
ARHGEF37	6	0.46346	3	3	16.828	1	0.10338	173.837	8.09919	0	0	1
BAG2	6	0.46346	3	3	2.651	1	0.09304	141.385	7.36141	0	0	1
HSPA2	31	0.56839	4	8	13.825	5	0.10338	180.568	8.28773	5422	54982	0.32143
HECW2	9.22337e+13	1.18699	21	21	19.492	1	0.10338	149.119	7.20292	0	0	1
LYVE1	2	0	1	2	10.186	2	0.1163	175.794	8.21532	733.653	4264	0
CD34	4	0.30779	2	4	17.438	1	0.13292	180.129	8.30686	306.528	2770	0.16667
EPHA3	1	0	1	1	1.097	1	0.00273	1	0.00819	0	0	0
EPHA7	1	0	1	1	1.097	1	0.00273	1	0.00819	0	0	0
KLHL42	9.22337e+13	1.16463	22	22	19.824	1	0.10338	149.619	7.20429	1.42857	20	0.96537
STBD1	26	0.56839	4	6	20.951	4	0.10338	173.265	8.07596	4477.92	103296	0.46667
TUBG2	2	0.30779	2	2	8.898	1	0.1163	171.385	8.13744	0	0	1
DYNC1I1	13	0.46346	3	10	17	19	0.10338	191.528	8.45032	7640.24	44724	0.11111
CLIP1	2	0.30779	2	2	3.945	1	0.10338	155.678	7.77812	0	0	1
COL10A1	9.22337e+13	1.26835	27	27	151.192	1	0.1163	189.904	8.21122	0.62121	14	0.98006
ARHGEF26	6	0.46346	3	3	15.579	1	0.10338	173.837	8.09919	0	0	1
ARHGAP24	6	0.46346	3	3	16.732	1	0.10338	173.837	8.09919	0	0	1
FXYD1	2	0.30779	2	2	1.184	1	0.00273	2.5	0.01455	0	0	1
SPARCL1	9.22337e+13	1.14582	19	19	131.78	1	0.1163	221.587	8.80145	0	0	1
LGALS1	9.22337e+13	1.14582	19	19	135.061	1	0.1163	221.587	8.80145	0	0	1
ARHGEF17	6	0.46346	3	3	17.057	1	0.10338	173.837	8.09919	0	0	1
IL3RA	3	0	1	3	27.701	3	0.1163	212.211	8.85063	2933.76	18566	0
FGF7	720	0.71324	6	6	41.104	1	0.1163	202.546	8.65389	0	0	1
MYO9A	8	0.37893	4	4	18.451	1	0.10338	174.504	8.10192	80.2963	580	0.66667
MAP3K3	1	0	1	1	4.204	1	0.10338	161.087	7.91884	0	0	0
SSPN	50	0.47549	6	6	19.621	1	0.1163	163.868	7.88195	158.267	1074	0.66667
ARHGEF9	7	0.46346	3	4	16.223	2	0.10338	174.504	8.10192	1360	14016	0.5
NFATC4	1	0	1	1	3.105	1	0.10338	145.979	7.52126	0	0	0
PPAP2A	1	0	1	1	1.129	1	0.09304	111.71	6.15773	0	0	0
AGPAT4	6	0.30779	2	6	2.887	6	0.10338	135.978	7.08679	6778	74808	0.06667
BDKRB1	9.22337e+13	0.94663	38	38	162.466	1	0.1163	241.361	9.02005	802.173	29278	0.65292
GTF2IRD2	1	0	1	1	1.085	1	0.00273	1	0.00819	0	0	0
GTF2IRD2B	1	0	1	1	1.085	1	0.00273	1	0.00819	0	0	0
ADH1B	1	0	1	1	1.108	1	0.08458	94.2247	5.14124	0	0	0
UBE2D4	9.22337e+13	1.18699	21	21	20.233	1	0.10338	149.119	7.20292	0	0	1
PJA2	9.22337e+13	1.18699	21	21	19.575	1	0.10338	149.119	7.20292	0	0	1
CAP2	6	0.46346	3	3	6.378	1	0.10338	168.844	8.09372	0	0	1
MMRN1	9.22337e+13	1.1239	18	18	125.62	1	0.13292	224.312	8.89982	0	0	1
UBE2Q2	9.22337e+13	1.18699	21	21	19.272	1	0.10338	149.119	7.20292	0	0	1
PPP2R5B	5	0.30779	2	5	13.611	6	0.1163	187.72	8.44622	2396.08	21070	0.1
GLP2R	6227020800	0.9963	13	13	96.804	1	0.10338	192.249	8.37654	0	0	1
ITGA9	11	0.32413	5	6	60.867	4	0.1163	211.754	8.77002	1461.39	11138	0.33333
RHOQ	142	0.18067	27	29	60.174	25	0.1163	225.68	8.81374	12120	104510	0.12069
ARHGAP6	6	0.46346	3	3	18.016	1	0.10338	173.837	8.09919	0	0	1
RAB6B	722	0.71324	6	8	10.977	10	0.10338	174.621	8.09236	7152.52	41742	0.53571
IL1R1	1	0	1	1	15.057	1	0.1163	197.746	8.61017	0	0	0
XYLT1	40320	0.8164	8	8	60.656	1	0.1163	191.18	8.37517	0	0	1
SCN7A	6	0.46346	3	3	2.749	1	0.09304	137.729	7.19199	0	0	1
ACACB	1	0	1	1	1.174	1	0.08458	99.8671	5.35847	0	0	0
PTH1R	6227020800	0.9963	13	13	94.289	1	0.10338	192.249	8.37654	0	0	1
COL14A1	9.22337e+13	1.26835	27	27	150.732	1	0.1163	189.904	8.21122	0.62121	14	0.98006
RIN3	1	0	1	1	1.36	1	0.08458	116.243	6.35311	0	0	0
RAB31	721	0.71324	6	7	3.138	2	0.09304	143.184	7.28216	1360	10576	0.71429
HSD17B6	2	0	1	2	1.208	2	0.08458	94.8913	5.14397	1360	7806	0
CYP1B1	1	0	1	1	1.101	1	0.07754	82.8792	4.21491	0	0	0
PTGER3	9.22337e+13	1.20641	22	22	143.164	1	0.1163	211.587	8.66755	0	0	1
CX3CR1	9.22337e+13	1.20641	22	22	141.672	1	0.1163	211.587	8.66755	0	0	1
FXYD6	2	0.30779	2	2	1.22	1	0.00273	2.5	0.01455	0	0	1
F2RL3	9.22337e+13	1.09458	24	24	148.337	1	0.1163	228.313	8.91621	144.434	13818	0.88043
ASB2	9.22337e+13	1.16463	22	22	19.393	1	0.10338	149.619	7.20429	1.42857	20	0.96537
EPN2	87178291200	1.02476	14	14	89.056	1	0.1163	211.456	8.72084	0	0	1
CHD3	5040	0.76834	7	7	19.909	1	0.1163	181.499	8.26041	0	0	1
INPP5A	1	0	1	1	2.405	1	0.09304	127.558	6.84496	0	0	0
ITPKB	3	0	1	3	13.607	3	0.10338	159.942	7.77402	1459.91	77688	0
GPER1	9.22337e+13	1.16218	23	23	144.932	1	0.1163	215.504	8.7181	22.76	640	0.94862
LAMB2	9.22337e+13	0.63845	31	31	148.138	13	0.13292	238.436	8.94354	3101.06	40262	0.47097
PPP1R12C	4	0.30898	3	3	15.47	1	0.1163	172.611	8.10465	308.204	8172	0.66667
SNX18	87178291200	1.02476	14	14	91.04	1	0.1163	211.456	8.72084	0	0	1
USP20	1	0	1	1	14.568	1	0.10338	167.44	8.00765	0	0	0
TTC7B	1	0	1	1	1.078	1	0.00273	1	0.00819	0	0	0
FAM126A	1	0	1	1	1.078	1	0.00273	1	0.00819	0	0	0
DMPK	1	0	1	1	1.112	1	0.08458	114.534	6.27386	0	0	0
PLN	3	0	1	3	2.423	3	0.09304	139.725	7.20292	2718	30302	0
EDNRA	9.22337e+13	1.00643	26	26	149.185	1	0.1163	228.911	8.92168	649.492	26432	0.78769
KAL1	2	0.30779	2	2	14.069	1	0.1163	174.987	8.20302	0	0	1
STARD13	7	0.46346	3	4	16.764	1	0.10338	176.556	8.14018	425.853	1700	0.5
COL15A1	9.22337e+13	1.26835	27	27	148.33	1	0.1163	189.904	8.21122	0.62121	14	0.98006
DAAM1	1	0	1	1	2.292	1	0.09304	134.239	7.08952	0	0	0
SH3PXD2A	3	0	1	3	4.794	2	0.10338	158.102	7.79998	1427.3	12792	0
ADAM12	2	0	1	2	8.023	3	0.10338	159.785	7.85326	160.438	2438	0
DYNC2H1	25	0.56839	4	5	16.608	1	0.10338	167.218	7.98715	207.704	1074	0.6
LPAR1	9.22337e+13	0.88267	41	42	163.216	3	0.1163	250.211	9.12115	4752.9	66326	0.56562
KCNQ4	1	0	1	1	1.221	1	0.09304	121.787	6.66598	0	0	0
F2RL2	9.22337e+13	1.12344	23	24	143.504	2	0.1163	233.096	8.96266	3096.56	32916	0.84058
C7	1	0	1	1	11.444	1	0.1163	164.387	7.97213	0	0	0
RGMB	12	0.47366	4	4	15.046	1	0.10338	164.652	7.88605	451.333	8298	0.83333
SEMA6C	2	0	1	2	3.939	1	0.10338	157.716	7.80544	33.0031	180	0
RHOJ	126	0.20822	23	23	36.675	5	0.1163	202.539	8.51043	2645.04	37028	0.16996
ARHGEF15	6	0.46346	3	3	12.709	1	0.10338	173.837	8.09919	0	0	1
HSPB7	1	0	1	1	3.113	1	0.10338	153.688	7.7344	0	0	0
PTGFR	9.22337e+13	1.19074	22	22	143.523	1	0.1163	225.146	8.88479	72.5424	9932	0.98701
LSAMP	40320	0.8164	8	8	8.98	1	0.1163	157.537	7.69614	0	0	1
TCF7L1	3	0.30779	2	3	1.484	2	0.09304	131.052	6.97339	1360	8462	0.33333
TLE4	4	0.30779	2	4	6.356	4	0.10338	163.229	7.89835	4115.81	25612	0.16667
COL11A1	9.22337e+13	1.00413	34	34	156.738	21	0.1163	219.708	8.66345	2280.55	114804	0.71836
PTGER1	9.22337e+13	1.00438	25	25	145.61	1	0.1163	229.411	8.92987	459.787	16534	0.79667
DZIP1	6	0.46346	3	3	7.737	1	0.10338	152.753	7.68111	0	0	1
ADCY4	9.22337e+13	0.74668	37	37	158.117	4	0.1163	233.818	8.91621	2389.91	60172	0.51952
S1PR1	9.22337e+13	0.96601	27	27	151.066	2	0.1163	238.561	9.03508	3022.82	68530	0.74644
COL5A3	9.22337e+13	1.03856	32	32	156.24	1	0.1163	198.735	8.30686	509.15	29500	0.75806
APBA1	3	0.30779	2	3	14.084	3	0.10338	171.812	8.05683	2262.06	21672	0.33333
RHOB	860	0.1982	24	34	74.594	12	0.1163	232.935	8.92441	28382	273362	0.11408
ROBO4	1	0	1	1	2.382	1	0.09304	134.41	7.16877	0	0	0
TAGLN	1	0	1	1	1.107	1	0.08458	109.491	6.10445	0	0	0
TRPC4	2	0.30779	2	2	1.972	1	0.09304	131.532	7.01984	0	0	1
ATN1	5040	0.76834	7	7	18.402	1	0.1163	181.499	8.26041	0	0	1
COL18A1	9.22337e+13	1.04133	32	32	156.714	1	0.1163	226.568	8.78505	1265.17	53306	0.76008
KCNH2	2	0	1	2	1.392	2	0.09304	122.454	6.66871	1360	10266	0
KCNE4	1	0	1	1	1.095	1	0.08458	103.122	5.73966	0	0	0
GAB1	804	0.26407	20	20	103.546	11	0.13292	243.793	9.14848	3152.77	44122	0.22632
TRPC6	3	0.30779	2	3	2.571	2	0.09304	132.032	7.02121	1360	8804	0.33333
RNF24	1	0	1	1	1.094	1	0.08458	109.709	6.09215	0	0	0
FBXO30	9.22337e+13	1.16463	22	22	20.122	1	0.10338	149.619	7.20429	1.42857	20	0.96537
FBXO32	9.22337e+13	1.16463	22	22	19.331	1	0.10338	149.619	7.20429	1.42857	20	0.96537
INHBA	2	0.30779	2	2	6.529	1	0.1163	145.895	7.47754	0	0	1
PPP3CB	6	0	1	6	19.037	13	0.1163	189.765	8.45032	4782	33144	0
PPIA	1	0	1	1	2.852	1	0.10338	145.979	7.52126	0	0	0
FBLN2	120	0.64826	5	5	11.388	1	0.09304	139.858	7.16193	0	0	1
AOX1	3	0	1	3	1.299	4	0.09304	110.308	6.07029	4072	23410	0
RRAS	5	0.30898	3	4	9.035	1	0.10338	168.999	8.02268	982.267	4702	0.33333
RGS5	2	0.30779	2	2	28.096	1	0.1163	179.13	8.26041	0	0	1
NEGR1	40320	0.8164	8	8	9.445	1	0.1163	157.537	7.69614	0	0	1
NTM	40320	0.8164	8	8	10.568	1	0.1163	157.537	7.69614	0	0	1
LAMA4	5862	0.48071	15	15	101.628	1	0.13292	224.786	8.87249	1119.73	19018	0.45714
MFAP4	120	0.64826	5	5	9.568	1	0.09304	139.858	7.16193	0	0	1
PLCB1	9.22337e+13	0.87384	27	29	149.226	4	0.1163	217.204	8.69761	4198.08	161724	0.58374
GFRA1	11	0.46346	3	8	48.955	4	0.1163	219.461	8.91485	4999.78	47070	0.10714
CAMK1D	1	0	1	1	4.184	1	0.10338	146.518	7.49257	0	0	0
SPHK1	60	0.37904	8	10	63.483	3	0.13292	211.957	8.77139	6286.71	75092	0.31111
PPAP2B	5	0.30898	3	4	12.822	7	0.1163	167.615	8.00218	8122.77	90010	0.33333
CHRDL1	9.22337e+13	1.14582	19	22	132.265	6	0.1163	223.42	8.80828	6760	58072	0.75325
TAF9B	1	0	1	1	6.382	1	0.10338	159.979	7.86692	0	0	0
COL16A1	9.22337e+13	1.23044	28	28	150.48	1	0.13292	210.988	8.62793	388.079	24010	0.93915
SOD3	1	0	1	1	1.085	1	0.00273	1	0.00819	0	0	0
GPX8	1	0	1	1	1.085	1	0.00273	1	0.00819	0	0	0
RGS2	1	0	1	1	2.62	1	0.09304	138.392	7.19746	0	0	0
MAP1B	2	0	1	2	4.577	1	0.10338	152.318	7.68931	2	4	0
FSTL1	9.22337e+13	1.14582	19	19	129.224	1	0.1163	221.587	8.80145	0	0	1
CAMK2G	6	0.30779	2	6	10.186	3	0.10338	173.716	8.11558	4048.83	20770	0.13333
RAB9B	722	0.71324	6	8	2.925	3	0.09304	143.684	7.28353	2718	21150	0.53571
DENND2A	1	0	1	1	1.22	1	0.08458	116.41	6.35447	0	0	0
FCN3	2	0.30779	2	2	16.3	1	0.10338	163.318	7.87922	0	0	1
LOXL3	5112	0.59858	10	10	36.974	1	0.10338	154.103	7.47754	86.0708	5862	0.66667
ROR2	5	0.30779	2	5	17.907	3	0.10338	184.787	8.35468	3320.89	18430	0.1
WASF1	3	0	1	3	22.295	1	0.1163	195.813	8.61427	268.687	1574	0
NDST1	24	0.56839	4	4	35.206	1	0.10338	182.323	8.26451	0	0	1
GSTM2	1	0	1	1	1.09	1	0.00273	1	0.00819	0	0	0
GSTM5	1	0	1	1	1.09	1	0.00273	1	0.00819	0	0	0
PPP1R12B	1448	0.54893	9	9	45.639	12	0.1163	188.57	8.33009	2170.77	36734	0.63889
UTRN	5043	0.64146	8	9	72.916	2	0.13292	214.119	8.78778	1650.68	21522	0.61111
NR3C2	30	0.51861	5	5	13.708	1	0.10338	181.802	8.32325	106.311	360	0.8
CNR1	9.22337e+13	1.20641	22	22	143.33	1	0.1163	211.587	8.66755	0	0	1
GABBR1	9.22337e+13	1.16702	23	23	143.218	1	0.1163	212.087	8.66892	13.7321	314	0.95257
NOTCH4	13	0.28529	6	7	24.973	5	0.1163	196.342	8.54459	3188.06	33602	0.28571
EDIL3	6	0.46346	3	3	41.13	1	0.1163	197.185	8.56782	0	0	1
MDGA1	40321	0.8164	8	9	8.71	2	0.1163	161.377	7.77129	1370.34	15200	0.77778
ADCY9	9.22337e+13	0.74668	37	37	157.682	2	0.1163	233.818	8.91621	2389.91	60172	0.51952
HOXA3	1	0	1	1	1.503	1	0.08458	120.704	6.57717	0	0	0
CD81	2	0	1	2	14.926	2	0.10338	176.116	8.12925	1360	12492	0
PTGFRN	1	0	1	1	1.737	1	0.09304	137.675	7.20019	0	0	0
LTBP3	2	0.30779	2	2	26.109	1	0.13292	180.029	8.2891	0	0	1
PLOD2	9.22337e+13	1.20641	22	22	141.885	1	0.1163	187.404	8.20439	0	0	1
RAB23	722	0.71324	6	8	7.465	3	0.10338	161.828	7.82457	4091.12	44908	0.57143
FGF10	720	0.71324	6	6	42.247	1	0.1163	202.546	8.65389	0	0	1
LAMB1	9.22337e+13	0.5494	36	37	154.367	8	0.13292	259.66	9.19629	10090.6	126838	0.36486
DUSP1	6	0.46346	3	3	13.26	1	0.10338	179.797	8.2932	0	0	1
HOMER2	120	0.64826	5	5	3.371	1	0.09304	145.788	7.36961	0	0	1
RPS6KA5	2	0	1	2	3.558	2	0.10338	161.754	7.92157	1360	7678	0
COL4A6	9.22337e+13	1.1428	31	31	156.572	2	0.13292	224.7	8.80691	1020.85	60306	0.84301
MAP1A	1	0	1	1	2.217	1	0.09304	140.358	7.2726	0	0	0
GREM1	6	0.46346	3	3	4.707	1	0.09304	131.74	6.96109	0	0	1
PRNP	25	0.56839	4	5	42.755	1	0.1163	188.368	8.37517	338.248	3970	0.6
NCAM1	728	0.71324	6	14	82.417	5	0.1163	202.273	8.57875	6866.41	162678	0.17582
FABP4	1	0	1	1	5.548	1	0.10338	158.275	7.82184	0	0	0
CD36	40324	0.69213	9	11	53.106	4	0.1163	212.589	8.75089	3254.02	24322	0.52727
CLU	9.22337e+13	1.1239	18	19	126.809	2	0.13292	224.812	8.90118	1360	10576	0.89474
TNC	9.22337e+13	0.79846	25	25	141.86	4	0.1163	233.687	8.92578	1258.62	21360	0.63333
SGIP1	87178291200	1.02476	14	14	90.171	1	0.1163	211.456	8.72084	0	0	1
GAS1	4	0.30898	3	3	3.768	2	0.09304	147.194	7.53766	510.015	5370	0.66667
DEGS1	40326	0.52601	11	11	51.73	9	0.1163	208.849	8.69761	4191.38	40310	0.56364
GNAL	842	0.69516	7	9	80.305	3	0.1163	189.494	8.36697	2718.91	60394	0.52778
ADCY5	9.22337e+13	0.74668	37	37	157.582	3	0.1163	233.818	8.91621	2389.91	60172	0.51952
JAM3	1	0	1	1	1.098	1	0.00273	1	0.00819	0	0	0
JAM2	1	0	1	1	1.098	1	0.00273	1	0.00819	0	0	0
HDAC7	5055	0.51877	10	11	27.232	3	0.1163	199.611	8.60334	2003.65	21782	0.47273
IGFBP7	9.22337e+13	1.05628	20	20	131.216	1	0.1163	229.985	8.92851	1532.58	14866	0.90526
CACNA2D3	2	0.30779	2	2	14.38	1	0.10338	157.777	7.76309	0	0	1
LOXL2	5112	0.59858	10	10	35.894	2	0.10338	154.103	7.47754	86.0708	5862	0.66667
SYT11	87178291200	1.02476	14	14	91.83	1	0.1163	211.456	8.72084	0	0	1
LPP	1	0	1	1	15.477	1	0.1163	178.085	8.26041	0	0	0
EZH1	6	0.46346	3	3	4.968	1	0.10338	146.194	7.46798	0	0	1
TNS1	5053	0.59666	9	10	74.714	3	0.13292	227.343	8.98316	1971.23	20242	0.55556
LMOD1	1307674368000	1.05156	15	15	100.399	1	0.13292	212.267	8.76182	0	0	1
NRG2	6	0.46346	3	3	24.954	1	0.1163	199.346	8.62656	0	0	1
BTC	6	0.46346	3	3	28.292	1	0.1163	199.346	8.62656	0	0	1
KCNS3	3	0.30779	2	3	19.303	10	0.1163	189.382	8.50223	12096	112706	0.33333
FBLN1	120	0.64826	5	5	8.648	1	0.09304	139.858	7.16193	0	0	1
THY1	40324	0.8164	8	12	38.39	11	0.13292	201.41	8.55825	11738.5	133404	0.45455
SNAI1	5041	0.76834	7	8	32.566	7	0.1163	208.285	8.73177	1571.49	29852	0.75
SGCE	24	0.56839	4	4	14.402	1	0.1163	157.775	7.74396	0	0	1
NOTCH3	17	0.23326	8	9	10.783	2	0.10338	174.679	8.0582	5131.18	46002	0.22222
HEYL	2	0.30779	2	2	5.295	1	0.10338	161.946	7.89015	0	0	1
COL12A1	9.22337e+13	1.26835	27	27	150.779	1	0.1163	189.904	8.21122	0.62121	14	0.98006
PDE1B	4	0.30898	3	3	2.918	2	0.10338	147.685	7.49667	679	10644	0.66667
ADAMTS2	6227025840	0.9963	13	20	82.155	14	0.1163	185.463	8.13881	14288	419244	0.52105
PKD2	1	0	1	1	1.099	1	0.00273	1	0.00819	0	0	0
PKD1	1	0	1	1	1.099	1	0.00273	1	0.00819	0	0	0
CSPG4	40608	0.54053	14	14	69.802	4	0.1163	194.18	8.38337	312.808	5702	0.52747
AKT3	9	0.46346	3	6	50.561	3	0.13292	216.129	8.8479	1436.97	10754	0.2
A2M	9.22337e+13	1.0319	19	23	131.243	26	0.13292	236.912	9.03098	12642.4	149454	0.62055
ITGA1	1314380401005	0.41619	45	46	161.248	62	0.15507	273.633	9.3985	32346	722904	0.2599
GNAZ	40284792	0.66846	18	18	123.943	1	0.13292	212.733	8.72494	821.797	14924	0.59477
ITGA7	44	0.43905	7	7	68.531	1	0.1163	205.501	8.65116	32.3465	558	0.57143
UBE2E2	9.22337e+13	1.18699	21	21	19.501	1	0.10338	149.119	7.20292	0	0	1
DAB2	87178291207	1.02476	14	18	102.779	2	0.13292	224.369	8.88889	4764.97	35918	0.61438
SOCS5	87178291202	0.92137	15	15	18.275	8	0.1163	166.545	7.8191	4688.48	74256	0.87619
CREM	4	0.30779	2	4	24.867	2	0.1163	199.951	8.66892	1656.89	11764	0.16667
FHL5	1	0	1	1	3.587	1	0.10338	152.478	7.73986	0	0	0
TMOD2	5040	0.76834	7	7	42.268	1	0.1163	171.408	8.03088	0	0	1
CNTN1	2	0.30779	2	2	1.238	1	0.08458	114.279	6.26703	0	0	1
KAT2B	46	0.2003	15	17	44.277	11	0.1163	216.494	8.79598	15929.2	113462	0.14706
PDE1C	2	0.30779	2	2	1.529	1	0.09304	120.593	6.56898	0	0	1
PDE1A	4	0.30898	3	3	3.574	1	0.10338	147.685	7.49667	679	10644	0.66667
WLS	6	0.46346	3	3	5.408	1	0.09304	133.029	7.01574	0	0	1
MAGEH1	2	0.30779	2	2	11.03	1	0.10338	168.925	8.09099	0	0	1
SMPD1	2	0	1	2	16.725	1	0.1163	199.38	8.6334	706.113	5230	0
SGMS2	3	0.30779	2	3	8.747	1	0.10338	166.311	7.99808	108.055	1476	0.33333
FERMT2	2	0	1	2	24.189	1	0.1163	186.318	8.42163	5.70588	64	0
DLL4	4	0.30898	3	3	4.536	1	0.10338	152.821	7.65652	178.06	3564	0.66667
NEURL1B	2	0.30779	2	2	2.708	1	0.09304	136.486	7.13051	0	0	1
MYO1C	9	0.37893	4	5	20.454	2	0.10338	180.579	8.18663	1444.31	10552	0.4
GKAP1	1	0	1	1	2.273	1	0.09304	138.392	7.19746	0	0	0
RAP1A	81036	0.42958	21	21	117.539	5	0.1163	249.311	9.20039	5572.38	78624	0.3619
PLAT	2	0	1	2	11.15	1	0.1163	164.781	7.96803	2.73705	38	0
LRP1	59	0.31924	10	11	82.238	3	0.1163	222.344	8.88342	2225.88	30972	0.29091
COL4A1	9.22337e+13	1.09381	32	32	154.034	1	0.13292	234.479	8.95583	2126.07	112924	0.79839
HOXA5	3	0	1	3	1.496	3	0.08458	122.037	6.58264	2718	17890	0
HOXB4	1	0	1	1	1.104	1	0.07754	102.515	5.65358	0	0	0
SHC2	3	0.30779	2	3	20.884	1	0.1163	188.623	8.47901	32.2391	500	0.33333
SCN4B	6	0.46346	3	3	2.491	1	0.09304	137.729	7.19199	0	0	1
GRIK5	2	0.30779	2	2	2.73	1	0.09304	142.277	7.31086	0	0	1
FZD8	121	0.64826	5	6	15.153	4	0.10338	167.502	7.94343	4068	22542	0.66667
AGTR1	9.22337e+13	0.69657	39	39	159.292	4	0.1163	249.344	9.11705	7763.49	73444	0.47638
LTBP1	9.22337e+13	0.99481	21	21	135.966	1	0.13292	225.236	8.83697	354.616	5188	0.8381
AMPH	87178291200	1.02476	14	14	91.676	1	0.1163	211.456	8.72084	0	0	1
FNBP1	87178291200	1.02476	14	14	87.181	1	0.1163	211.456	8.72084	0	0	1
CHST1	6	0.46346	3	3	15.047	1	0.1163	154.102	7.64559	0	0	1
BMP1	5065	0.76834	7	12	88.631	3	0.1163	189.223	8.27817	1742.37	85174	0.40909
DSE	120	0.64826	5	5	38.384	1	0.1163	175.032	8.05547	0	0	1
CHST15	120	0.64826	5	5	37.672	1	0.1163	175.032	8.05547	0	0	1
SNX1	1	0	1	1	15.547	1	0.10338	166.887	8.00218	0	0	0
F2R	9.22337e+13	0.93236	28	29	153.49	2	0.1163	231.48	8.93124	1896.32	39898	0.66256
SERPINH1	9.22337e+13	1.24323	24	24	147.177	1	0.1163	188.404	8.20712	0	0	1
MS4A2	6	0.2842	4	4	28.864	2	0.1163	210.096	8.78642	518.867	5602	0.5
FCER1A	6	0.2842	4	4	30.084	1	0.1163	210.096	8.78642	518.867	5602	0.5
MFGE8	9.22337e+13	0.96095	22	22	135.602	1	0.1163	232.354	8.92304	726.833	16426	0.79654
GAS6	9.22337e+13	0.7461	36	36	157.025	2	0.13292	245.929	9.05694	3204.92	40598	0.52381
PYGM	2	0	1	2	2.118	1	0.09304	125.697	6.74932	141.573	718	0
PHKG1	2	0	1	2	3.828	2	0.10338	148.018	7.5117	951.505	8770	0
RECK	40321	0.8164	8	9	9.272	1	0.1163	162.74	7.79998	305.871	1920	0.77778
ANXA6	1	0	1	1	1.096	1	0.00273	1	0.00819	0	0	0
DYSF	1	0	1	1	1.096	1	0.00273	1	0.00819	0	0	0
GNAO1	80201616	0.63868	20	20	127.214	1	0.13292	218.117	8.78232	2228.48	22724	0.54737
TMOD1	5040	0.76834	7	7	39.143	1	0.1163	171.408	8.03088	0	0	1
LAMA2	5832	0.53647	13	13	88.69	1	0.13292	215.605	8.75363	430.579	8562	0.53846
LRRC4	1	0	1	1	2.369	1	0.10338	125.776	6.76845	0	0	0
NTNG2	40321	0.8164	8	9	9.675	2	0.1163	158.037	7.69751	1360	13118	0.77778
ENAH	6	0.46346	3	3	6.755	1	0.10338	168.844	8.09372	0	0	1
ABL1	29	0.37893	4	14	46.424	26	0.1163	226.061	8.97633	17177.6	112756	0.13187
TEAD3	6	0.46346	3	3	7.477	1	0.1163	163.573	7.97076	0	0	1
MITF	2	0	1	2	3.764	2	0.10338	161.754	7.92157	1360	7678	0
TFE3	1	0	1	1	1.523	1	0.09304	129.441	6.99252	0	0	0
PLXNA4	20	0.26242	8	10	23.256	7	0.1163	196.218	8.54869	3835.46	35792	0.2
PHACTR1	1	0	1	1	13.379	1	0.1163	173.346	8.1593	0	0	0
HDAC5	5061	0.47511	11	12	26.894	5	0.1163	195.299	8.49814	2829	23490	0.42424
MEF2A	19	0.26242	8	9	22.174	9	0.1163	205.465	8.71264	6211.54	34004	0.25
PCOLCE	5064	0.76834	7	11	81.269	1	0.1163	178.692	8.08006	1014.18	70056	0.49091
PDGFC	6	0.46346	3	3	27.79	1	0.13292	187.812	8.42572	0	0	1
WNT9A	126	0.57059	6	6	17.734	1	0.10338	167.168	7.9407	451.333	7506	0.8
GPC6	40392	0.62782	11	11	64.294	3	0.1163	198.661	8.50633	102.214	2444	0.67273
CBX6	5070	0.49207	11	11	21.105	3	0.1163	189.792	8.3943	1464.38	30046	0.52727
BDKRB2	9.22337e+13	0.90969	39	39	162.105	2	0.13292	243.21	9.04737	1298.33	35070	0.62213
SPOP	12	0.47366	4	4	11.212	1	0.10338	160.284	7.8519	34.2759	1110	0.83333
LRRK2	2	0.30779	2	2	3.199	1	0.09304	118.258	6.27796	0	0	1
WNT2B	126	0.57059	6	6	17.083	1	0.10338	167.168	7.9407	451.333	7506	0.8
TRPC1	3	0.30779	2	3	9.454	4	0.10338	164.38	7.94617	4068	26400	0.33333
MAPK11	53	0.27149	11	18	37.972	17	0.1163	218.211	8.8479	17895.9	120628	0.10458
HDAC4	7	0.46346	3	4	9.407	1	0.10338	165.429	7.93387	353.67	1374	0.5
VAMP4	87178291213	0.85255	16	17	93.975	13	0.1163	214.839	8.7468	6147.94	40252	0.69853
PDGFD	7	0.46346	3	4	29.533	1	0.13292	188.479	8.42846	243.984	4534	0.5
RSU1	2	0.30779	2	2	10.74	1	0.10338	166.987	8.02678	0	0	1
KIT	6	0.30898	3	5	37.664	2	0.1163	211.08	8.78642	961.494	9820	0.2
LNPEP	6	0.46346	3	3	18.364	1	0.10338	179.412	8.18253	0	0	1
SLC2A4	12	0.47366	4	4	21.029	1	0.10338	180.079	8.18526	1.33333	4	0.83333
CTGF	14	0.37893	4	7	36.841	4	0.13292	201.895	8.62383	2036.12	21084	0.33333
PTGIS	1	0	1	1	1.101	1	0.00205	1.5	0.01228	0	0	0
PTGS1	2	0	1	2	1.178	3	0.00409	2	0.01432	2	2	0
SDC2	9.22337e+13	0.58194	33	33	144.009	14	0.1163	249.077	9.11022	9094.78	102816	0.42045
TGFBR3	12	0.47366	4	4	27.93	1	0.13292	181.829	8.30139	3.83333	12	0.83333
KCND1	2	0	1	2	1.181	2	0.09304	122.454	6.66871	452	10258	0
PPP1R14A	8	0.37893	4	4	19.625	1	0.10338	185.406	8.34102	156.984	2292	0.66667
PPP1R12A	1457	0.45814	11	12	48.777	2	0.1163	199.846	8.51863	5863.19	76934	0.40909
NICN1	1	0	1	1	1.083	1	0.00273	1	0.00819	0	0	0
LRRC49	1	0	1	1	1.083	1	0.00273	1	0.00819	0	0	0
ANK2	9	0.46346	3	6	11.156	6	0.10338	174.225	8.11558	7239.1	46362	0.26667
LIFR	1	0	1	1	2.494	1	0.10338	138.527	7.27807	0	0	0
CTF1	2	0	1	2	13.301	2	0.1163	176.649	8.20712	1360	9646	0
GNAI2	9.22337e+13	0.67027	38	38	158.828	7	0.13292	240.583	8.99545	6791.9	78446	0.4623
TUBA1A	10	0.37893	4	6	13.375	2	0.1163	184.123	8.35331	633.023	3432	0.33333
TUBB6	2	0.30779	2	2	7.435	1	0.10338	167.128	8.04454	0	0	1
ITPR1	5052	0.67062	8	14	88.564	15	0.1163	221.168	8.86703	15404	116844	0.26374
ATP1B2	4	0.30898	3	3	1.271	1	0.00546	3	0.01637	1	2	0.66667
ATP1A2	4	0.30898	3	3	1.281	1	0.00546	3	0.01637	1	2	0.66667
KCND3	2	0	1	2	1.902	1	0.09304	122.454	6.66871	452	10258	0
ITGA8	48	0.52304	6	6	71.554	1	0.13292	215.452	8.82057	15.0297	390	0.73333
SGCB	48	0.58344	5	5	11.824	1	0.1163	158.275	7.74533	0.5	2	0.9
STAT5B	19	0.47366	4	10	41.891	9	0.13292	206.76	8.68395	24234.6	344890	0.15556
GHR	3	0.30779	2	3	22.645	35	0.1163	207.096	8.7304	21288.7	178058	0.33333
GNAI1	9.22337e+13	0.67486	39	39	156.102	3	0.13292	253.693	9.18263	10526.3	140920	0.46154
HGF	9.22337e+13	0.70372	26	27	144.261	4	0.13292	245.476	9.11978	2842.02	33618	0.50997
CALD1	1307674368000	1.05156	15	15	94.266	1	0.13292	212.267	8.76182	0	0	1
PTRF	2	0	1	2	5.68	6	0.1163	160.883	7.90928	6760	38990	0
NNMT	2	0	1	2	1.376	5	0.10338	130.31	6.99115	5416	31200	0
MEIS1	1	0	1	1	1.493	1	0.08458	120.704	6.57717	0	0	0
PBX1	5	0	1	5	3.62	6	0.09304	149.372	7.50623	6848.11	44860	0
COL4A5	9.22337e+13	1.09381	32	32	158.381	1	0.13292	234.479	8.95583	2126.07	112924	0.79839
COL8A2	9.22337e+13	1.26835	27	27	150.365	1	0.1163	189.904	8.21122	0.62121	14	0.98006
SGCA	24	0.56839	4	4	10.356	1	0.1163	157.775	7.74396	0	0	1
FZD1	124	0.52304	6	8	16.736	2	0.10338	171.459	8.01858	2520.16	19792	0.39286
PDGFRA	91	0.4296	9	10	61.168	2	0.13292	224.819	8.95173	2944.03	40268	0.4
PIK3R1	9.22337e+13	0.2984	64	73	165.499	160	0.13292	296.51	9.53923	82419.3	1148158	0.13394
RYR2	2	0	1	2	3.444	2	0.10338	147.185	7.4953	1360	10648	0
MFAP2	5166	0.54298	11	11	30.756	3	0.10338	178.385	8.08553	2835.57	53264	0.58182
BGN	40614	0.45768	16	16	84.703	1	0.13292	207.279	8.61017	1125.78	19740	0.425
DCN	40827	0.31844	26	27	127.726	8	0.13292	228.883	8.85473	7358.84	106862	0.23077
VCAN	9.22337e+13	0.62148	32	33	141.335	4	0.1163	230.92	8.84926	5628.97	61744	0.42614
TGFB2	9.22337e+13	0.6268	27	27	141.456	3	0.13292	239.726	9.05694	3916.33	57544	0.48433
BMP6	1	0	1	1	2.157	1	0.09304	130.74	6.95836	0	0	0
BMPR1A	13	0.47366	4	5	15.366	2	0.10338	165.152	7.88742	1811.33	16602	0.5
MYH10	1442	0.6123	8	8	46.571	1	0.1163	192.375	8.42572	558.507	5230	0.75
TPM4	1307674373064	0.77378	20	20	106.421	5	0.13292	215.767	8.77685	1518.21	30870	0.66316
SGCD	48	0.58344	5	5	12.083	1	0.1163	158.275	7.74533	0.5	2	0.9
DMD	10179	0.38194	19	20	91.037	7	0.13292	211.005	8.66892	8582.52	98688	0.3
WNT2	128	0.47564	7	7	17.659	3	0.10338	167.668	7.94207	992.43	13588	0.61905
FZD4	87178291393	0.74927	18	24	115.862	12	0.1163	224.137	8.8438	15668.1	115396	0.4058
GUCY1A2	2	0.30779	2	2	2.689	1	0.09304	138.892	7.19882	0	0	1
AMOTL1	1	0	1	1	1.906	1	0.10338	150.543	7.68385	0	0	0
ZYX	5054	0.51877	10	10	82.029	2	0.13292	225.31	8.9408	783.705	15256	0.57778
DES	5040	0.76834	7	7	44.464	1	0.1163	171.408	8.03088	0	0	1
VIM	5040	0.76834	7	7	44.333	1	0.1163	171.408	8.03088	0	0	1
SORBS1	1307674368001	1.05156	15	16	99.183	1	0.13292	218.317	8.81784	1719.37	28566	0.875
MFAP5	5166	0.54298	11	11	30.859	4	0.10338	178.385	8.08553	2835.57	53264	0.58182
KCNA5	1	0	1	1	1.287	1	0.09304	121.787	6.66598	0	0	0
KCNAB1	7	0	1	7	3.56	9	0.10338	150.946	7.59504	10813	102544	0
CYP7B1	1	0	1	1	1.089	1	0.00273	1	0.00819	0	0	0
CH25H	1	0	1	1	1.089	1	0.00273	1	0.00819	0	0	0
KCND2	2	0	1	2	1.779	1	0.09304	122.454	6.66871	452	10258	0
KCNIP4	3	0	1	3	1.276	1	0.08458	104.456	5.74512	3	6	0
AR	69	0.21031	15	16	72.677	8	0.1163	237.627	9.12252	16074.6	147478	0.175
ITGB5	1307674368114	0.50322	26	26	130.81	4	0.13292	236.317	8.99682	3835.34	51588	0.39385
PECAM1	24	0.32929	7	9	62.178	8	0.1163	217.037	8.84107	3293.94	42098	0.25
TPM2	1307674373208	0.74045	21	21	108.208	1	0.13292	217.283	8.79052	1700.87	34812	0.62381
ACTG2	1307674368001	1.05156	15	16	101.464	2	0.13292	212.767	8.76319	1360	10308	0.875
LOXL1	5112	0.59858	10	10	34.592	1	0.10338	154.103	7.47754	86.0708	5862	0.66667
FBN1	9.22337e+13	0.80687	25	28	147.434	9	0.1163	240.804	8.98589	13406.7	202540	0.51587
NRP2	26	0.56839	4	6	35.586	1	0.1163	197.282	8.57875	556.701	8024	0.46667
KCNMB1	1	0	1	1	1.072	1	0.00273	1	0.00819	0	0	0
KCNMA1	1	0	1	1	1.072	1	0.00273	1	0.00819	0	0	0
EPM2A	4	0.30898	3	3	3.786	2	0.09304	137.328	7.1633	655.32	22904	0.66667
SOCS3	9.22337e+13	1.0135	24	25	21.11	34	0.1163	182.794	8.10192	38525.4	419030	0.75
LEPR	7	0.46346	3	4	3.406	10	0.10338	142.286	7.19746	12096	185288	0.5
CFL2	1	0	1	1	6.713	1	0.10338	163.64	7.97759	0	0	0
ACTB	21	0.32413	5	13	58.092	5	0.1163	222.035	8.90665	7027.77	55358	0.11538
PPP1R3C	2	0.30779	2	2	2.194	1	0.08458	114.32	6.25884	0	0	1
GYG1	5	0.30898	3	4	3.158	1	0.09304	138.662	7.18653	1269.05	34294	0.33333
COL6A3	9.22337e+13	1.09381	32	32	156.677	1	0.13292	234.479	8.95583	2126.07	112924	0.79839
ITGA5	34	0.27934	10	10	87.269	1	0.1163	224.011	8.93671	670.368	14004	0.31111
DLG4	128	0.64826	5	12	10.716	10	0.10338	182.58	8.20166	10309.1	70598	0.19697
PTN	1	0	1	1	8.031	1	0.10338	152.105	7.6087	0	0	0
SDC3	40405	0.5237	13	14	84.159	2	0.1163	202.877	8.53776	1591.77	18418	0.45055
EVC	120	0.64826	5	5	15.353	1	0.10338	160.784	7.85326	0	0	1
EVC2	120	0.64826	5	5	15.914	1	0.10338	160.784	7.85326	0	0	1
MYL6	1307674369440	0.81748	19	19	104.195	2	0.13292	221.95	8.85883	2488.44	59850	0.71345
NID2	720	0.71324	6	6	53.188	1	0.1163	189.013	8.36151	0	0	1
COL5A1	9.22337e+13	0.98668	35	35	157.834	1	0.13292	230.083	8.8438	4285.01	185904	0.69916
CDON	9	0.46346	3	6	13.488	5	0.10338	189.183	8.45988	5510.14	33602	0.26667
NR3C1	55	0.24269	13	14	52.639	38	0.1163	236.711	9.10885	19642.6	156172	0.20879
FKBP5	24	0.56839	4	4	12.911	1	0.10338	178.568	8.28227	0	0	1
TPM1	1307674373328	0.70504	22	22	113.669	1	0.13292	221.933	8.8397	2227.16	40368	0.58442
SEMA3C	6	0.2842	4	4	11.037	1	0.10338	165.949	7.96256	70.0855	376	0.5
PLXND1	9	0.30898	3	8	12.783	3	0.10338	179.585	8.15657	5607.12	33142	0.10714
FLNA	5	0.30779	2	5	27.758	5	0.1163	202.946	8.66345	2920.77	21118	0.2
SPARC	9.22337e+13	0.90437	21	23	136.007	3	0.13292	234.312	8.98043	4263.58	56148	0.63241
BOC	2	0.30779	2	2	1.831	1	0.08458	122.539	6.69057	0	0	1
CNTNAP1	2	0.30779	2	2	1.23	1	0.08458	114.279	6.26703	0	0	1
NFASC	8	0.46346	3	5	2.763	3	0.09304	138.729	7.19472	2716	17588	0.4
KCNJ8	1	0	1	1	1.092	1	0.00273	1	0.00819	0	0	0
ABCC9	1	0	1	1	1.092	1	0.00273	1	0.00819	0	0	0
FBLN5	5160	0.59858	10	10	22.426	1	0.09304	143.465	7.18516	28.3854	654	0.66667
ENG	124	0.52304	6	8	34.356	2	0.13292	189.602	8.40523	1290.58	21042	0.42857
ACVRL1	122	0.52304	6	6	28.777	1	0.13292	185.936	8.36561	618.189	14510	0.73333
DLC1	8	0.46346	3	5	21.116	2	0.1163	187.437	8.38337	1516.75	10822	0.3
TENC1	1	0	1	1	2.44	1	0.10338	144.477	7.45431	0	0	0
CFD	9.22337e+13	1.03861	19	19	129.151	1	0.13292	231.012	8.9695	531.023	9838	0.90643
NDN	2	0.30779	2	2	9.559	1	0.10338	168.925	8.09099	0	0	1
MYH11	1307674369440	0.81748	19	19	100.684	2	0.13292	221.95	8.85883	2488.44	59850	0.71345
ACTA2	1307674368002	1.05156	15	17	104.146	1	0.13292	219.833	8.86429	3944.1	41690	0.77941
OMG	2	0.30779	2	2	5.384	1	0.10338	165.778	8.01858	0	0	1
RTN4	2	0.30779	2	2	4.992	1	0.10338	165.778	8.01858	0	0	1
PRKG1	14	0.30898	3	12	17.123	11	0.10338	179.166	8.12651	13956.9	154784	0.06061
MRVI1	2	0	1	2	8.47	1	0.10338	167.68	8.00082	623.822	2222	0
SRF	3	0	1	3	5.917	3	0.10338	164.221	7.95983	2780.88	15318	0
MYOCD	2	0	1	2	1.547	2	0.09304	131.427	7.03351	1360	7440	0
CBX7	6	0.46346	3	3	7.379	1	0.10338	146.194	7.46798	0	0	1
PHC1	5070	0.49207	11	11	25.427	1	0.1163	189.792	8.3943	1464.38	30046	0.52727
PER3	2	0.30779	2	2	1.211	1	0.00409	2	0.00819	0	0	1
NDNL2	3	0.30779	2	3	12.396	2	0.10338	169.592	8.09372	1360	20542	0.33333
EID3	1	0	1	1	2.387	1	0.09304	134.287	7.16467	0	0	0
NOS3	38	0.36588	7	11	79.688	10	0.13292	222.24	8.90665	6628.74	68030	0.18182
CAV1	124	0.64826	5	9	49.969	8	0.13292	214.019	8.82467	9204.07	62318	0.27778
LEPRE1	9.22337e+13	1.26984	26	26	152.258	1	0.1163	189.404	8.20986	0.16667	4	0.99385
CRTAP	9.22337e+13	1.26984	26	26	151.824	1	0.1163	189.404	8.20986	0.16667	4	0.99385
LOX	5112	0.59858	10	10	37.607	1	0.10338	154.103	7.47754	86.0708	5862	0.66667
ELN	5046	0.67062	8	8	30.449	1	0.10338	176.885	8.08143	821.762	25160	0.82143
SERPING1	9.22337e+13	1.1239	18	20	128.73	3	0.13292	225.479	8.90392	1606.33	13400	0.81053
DHH	6	0.30898	3	5	4.998	2	0.09304	150.889	7.61826	2285.29	20924	0.2
HHIP	7	0.46346	3	4	14.827	1	0.10338	161.117	7.86009	1167.8	14558	0.5
COL3A1	9.22337e+13	0.92924	36	36	159.054	1	0.1163	228.442	8.75226	4002.37	137414	0.65238
CACNA2D1	2	0.30779	2	2	14.623	1	0.10338	157.777	7.76309	0	0	1
C4A	9.22337e+13	0.85227	23	23	131.558	4	0.1163	223.587	8.80691	2510.36	22780	0.69565
C4B	10	0.32413	5	5	28.509	1	0.10338	178.116	8.13744	351.35	3814	0.5
NTN1	3	0	1	3	17.633	2	0.1163	199.08	8.61563	2038	16754	0
UNC5C	1	0	1	1	2.085	1	0.10338	151.652	7.68658	0	0	0
LUM	362922	0.61467	12	16	113.129	5	0.13292	205.148	8.57191	5705.35	102824	0.39167
FN1	9.22337e+13	0.45209	55	56	167.215	15	0.13292	282.476	9.43539	30009.1	304174	0.26688
ADRB2	93405312911	0.53862	32	33	140.671	3	0.1163	233.235	8.93671	7228.07	77398	0.36932
ARRB1	87178331682	0.45388	29	29	135.985	1	0.1163	250.754	9.16214	11728.4	140402	0.34236
STX1B	6	0.46346	3	3	29.657	1	0.10338	180.535	8.26587	0	0	1
COL6A2	9.22337e+13	1.09381	32	32	156.447	2	0.13292	234.479	8.95583	2126.07	112924	0.79839
COL6A1	9.22337e+13	1.04592	33	33	155.226	2	0.13292	237.645	8.98043	2726.72	122352	0.75568
RAMP3	6227020800	0.9963	13	13	99.638	1	0.10338	192.249	8.37654	0	0	1
COL5A2	9.22337e+13	0.98668	35	35	157.79	1	0.13292	230.083	8.8438	4285.01	185904	0.69916
PIP5K1C	13	0.37893	4	9	49.475	5	0.1163	218.977	8.88069	5756.72	77622	0.11111
NID1	726	0.62199	7	7	51.243	1	0.1163	190.013	8.36971	7.86627	40	0.80952
HSPG2	41255	0.35513	22	25	115.839	2	0.1163	226.594	8.85746	5704.34	78542	0.22667
TIMP2	10	0.37893	4	6	17.768	2	0.1163	189.727	8.43119	2192.3	18450	0.26667
MMP14	9	0.37893	4	5	36.45	1	0.1163	195.82	8.46535	465.28	2924	0.4
MYL9	1307674369448	0.65804	22	22	106.817	2	0.13292	226.733	8.90665	4811.37	88186	0.54545
GLI3	284	0.39514	12	12	33.637	2	0.1163	197.682	8.56235	4188.36	63658	0.40909
CACNA1C	152	0.38186	9	11	73.668	14	0.1163	211.565	8.69078	12242.9	131024	0.29091
CACNB2	150	0.38186	9	9	67.167	1	0.1163	205.432	8.6252	1956.42	42358	0.44444
NRXN3	124	0.43905	7	7	4.143	2	0.09304	154.594	7.59231	1049.78	13662	0.57143
VIPR2	6227020800	0.9963	13	13	97.911	1	0.10338	192.249	8.37654	0	0	1
VIP	6227020800	0.9963	13	13	93.559	1	0.10338	192.249	8.37654	0	0	1
CDH5	10	0.46346	3	7	17.721	5	0.1163	191.532	8.48721	5536.98	52658	0.19048
FGF1	722	0.5854	7	7	40.874	2	0.1163	203.046	8.65526	212.533	2002	0.7619
NGFR	21	0.2148	9	12	40.853	9	0.1163	225.027	8.94627	8180.56	78900	0.15152
NGF	31	0.20489	12	13	59.471	2	0.1163	229.927	9.01458	7227.53	92966	0.17949
NLGN2	121	0.64826	5	6	4.422	1	0.10338	151.972	7.52536	1036.35	10136	0.66667
PER1	2	0.30779	2	2	1.209	1	0.00409	2	0.00819	0	0	1
CRY2	2	0.30779	2	2	1.2	1	0.00409	2	0.00819	0	0	1
MAPK10	16	0.47366	4	8	29.097	6	0.1163	206.468	8.73996	3334.57	18808	0.25
JUN	5104	0.42792	14	26	87.202	12	0.13292	245.85	9.12662	22422.5	211694	0.12615
NRXN2	124	0.43905	7	7	4.192	1	0.09304	154.594	7.59231	1049.78	13662	0.57143
NLGN3	120	0.64826	5	5	3.035	1	0.09304	145.788	7.36961	0	0	1
TGFBR2	156	0.3733	11	11	61.172	2	0.13292	214.579	8.78642	1269.59	26482	0.4
PDGFRB	210	0.37162	14	14	87.958	1	0.13292	235.179	9.05694	4256.2	81290	0.36264
PDGFB	9.22337e+13	0.43861	41	43	160.228	21	0.13292	269.51	9.33975	26651.3	469300	0.268
CALM1	9	0.30779	2	9	26.703	9	0.1163	191.726	8.42163	10811.9	99388	0.02778
MYLK	1307674368721	0.85945	18	19	101.38	1	0.13292	217.75	8.81374	5105.76	70466	0.68421
PRKAR2B	266	0.28042	15	19	79.94	21	0.13292	234.25	9.04327	13890.2	207222	0.18713
PRKACB	273	0.24286	17	25	111.763	22	0.13292	264.626	9.3985	41852.6	440000	0.11333
FGF2	904	0.29957	21	21	107.46	2	0.13292	243.71	9.13071	3837.38	56302	0.25238
FGFR1	721	0.71324	6	7	45.779	1	0.1163	207.063	8.71264	400.039	5842	0.71429
NRP1	27	0.29157	8	12	44.435	3	0.1163	209.585	8.73723	6591.51	77134	0.19697
WWTR1	12	0.46346	3	8	20.109	4	0.1163	197.42	8.6129	3435.94	17562	0.17857
TEAD1	6	0.46346	3	3	6.573	1	0.1163	163.573	7.97076	0	0	1
C1S	8	0.37893	4	4	27.061	1	0.1163	176.027	8.13744	25.0771	574	0.66667
C1R	8	0.37893	4	4	28.977	1	0.1163	176.027	8.13744	25.0771	574	0.66667
ACTA1	10409	0.3674	21	22	119.095	3	0.13292	242.16	9.08836	5174.74	58524	0.28139
GSN	4	0.30779	2	4	34.788	3	0.1163	207.563	8.714	2666.48	25110	0.16667
VWF	9.22337e+13	0.67592	29	29	148.967	9	0.13292	255.86	9.23592	3580.74	43136	0.50985
F8	9.22337e+13	1.1239	18	19	127.475	4	0.13292	225.662	8.91621	2435.63	16572	0.89474
ROBO1	15	0.38896	5	6	9.982	2	0.10338	177.459	8.22625	1377.76	11526	0.4
SLIT2	15	0.38896	5	6	8.486	2	0.10338	170.344	8.09782	1815.43	10734	0.4
KDR	672	0.28202	22	24	114.611	21	0.13292	257.526	9.3015	18361.6	202466	0.19565
TGFB3	9.22337e+13	0.45218	36	36	148.912	18	0.15507	255.817	9.21679	14551.1	187766	0.31746
TGFBR1	144	0.4296	9	9	55.035	1	0.13292	210.979	8.75499	680.774	12302	0.5
PARK2	9.22337e+13	1.18699	21	23	20.186	3	0.10338	150.119	7.20565	2716	19624	0.83399
PINK1	2	0.30779	2	2	3.176	1	0.09304	118.258	6.27796	0	0	1
ITGAV	1313901471766	0.31641	51	51	163.33	50	0.13292	275.61	9.36708	32942.5	741762	0.19843
ITGB3	1313901471903	0.32983	50	51	163.503	6	0.13292	276.01	9.37118	26336.4	592364	0.2
COL1A1	9.22337e+13	0.87445	38	38	160.178	1	0.13292	238.9	8.92441	6506.28	236752	0.60313
COL1A2	9.22337e+13	0.84457	39	39	160.839	1	0.13292	243.717	8.97906	7826.08	252906	0.5776
VAMP8	87178331592	0.46791	28	28	114.805	14	0.1163	235.363	8.97906	12128.4	142362	0.35714
ACTN1	9.22337e+13	0.66201	28	29	146.473	2	0.13292	251.993	9.18946	5346.08	57064	0.47044
RAMP1	6227020800	0.9963	13	13	96.541	1	0.10338	192.249	8.37654	0	0	1
CALCRL	6227020800	0.9963	13	13	98.282	1	0.10338	192.249	8.37654	0	0	1
PGF	240	0.66569	6	6	56.029	1	0.1163	213.244	8.82604	13.5489	454	0.93333
GUCY1B3	4	0.30898	3	3	2.139	1	0.09304	139.392	7.20019	1	2	0.66667
GUCY1A3	2	0.30779	2	2	2.773	1	0.09304	138.892	7.19882	0	0	1
IGFBP5	9.22337e+13	1.06242	20	20	132.604	1	0.1163	222.92	8.81101	128.83	1142	0.91053
IGF1	9.22337e+13	0.76064	25	28	144.338	5	0.13292	248.126	9.13345	7050.25	70476	0.47884
PRKAA2	49	0.4082	8	9	2.195	4	0.09304	120.475	6.28753	3609.33	58556	0.38889
LIMS2	2	0.30779	2	2	9.2	1	0.10338	166.987	8.02678	0	0	1
TEK	13	0.38896	5	6	54.549	1	0.1163	219.111	8.89162	862.582	14286	0.4
ANGPT1	10	0.32413	5	5	46.451	1	0.1163	219.044	8.89298	58.6569	1042	0.5
PARVA	10	0.32413	5	5	23.64	3	0.1163	178.949	8.27134	133.448	2826	0.5
ILK	27	0.33284	6	15	74.108	4	0.1163	227.82	8.95447	7774.16	103844	0.10476
RRAGB	24	0.56839	4	4	1.742	1	0.08458	101.367	5.36257	0	0	1
RRAGA	24	0.56839	4	4	1.672	1	0.08458	101.367	5.36257	0	0	1
GLI2	285	0.39514	12	13	32.655	4	0.1163	200.832	8.60744	6125.84	75408	0.34615
VAMP2	87178291281	0.52782	23	28	114.881	8	0.1163	233.446	8.93397	15844	100272	0.30159
STX2	6	0.46346	3	3	29.059	1	0.10338	180.535	8.26587	0	0	1
C3	9.22337e+13	1.16218	23	48	163.623	10	0.1163	251.304	9.05557	21483.2	248772	0.36791
CFH	1	0	1	1	14.264	1	0.10338	175.449	8.12651	0	0	0
VCL	1307674413828	0.57536	28	32	137.918	7	0.13292	257.66	9.26461	12754.7	121392	0.33669
TLN1	1307674414132	0.45099	34	34	142.916	12	0.13292	263.976	9.33975	15724.8	214028	0.32264
PRKAB2	48	0.4082	8	8	2.082	2	0.09304	119.975	6.28616	2249.33	48788	0.5
PRKAG2	48	0.4082	8	8	2.198	3	0.09304	119.975	6.28616	2249.33	48788	0.5
GNB5	9.22337e+13	0.63909	55	55	165.568	18	0.1163	256.461	9.13345	9646.15	141586	0.39125
GNG7	9.22337e+13	0.62621	56	56	166.169	1	0.1163	257.294	9.13755	10520.4	160084	0.38117
DPYSL2	6	0.46346	3	3	7.907	1	0.10338	158.283	7.81501	0	0	1
DPYSL3	6	0.46346	3	3	7.615	1	0.10338	158.283	7.81501	0	0	1
FLT4	592	0.37055	15	17	105.388	6	0.13292	243.71	9.13755	6853.23	98998	0.27206
VEGFC	9.22337e+13	0.75644	25	25	137.154	1	0.13292	243.66	9.11569	1786.18	23352	0.6
FLT1	542	0.43905	12	12	76.973	1	0.1163	224.311	8.92851	839.794	14886	0.45455
VEGFB	9.22337e+13	0.87216	22	22	133.221	1	0.13292	230.143	8.97086	540.805	7208	0.72294
GLI1	300	0.47886	10	14	63.861	5	0.1163	208.782	8.7181	4427.61	66024	0.32967
SUFU	264	0.58315	8	8	29.609	2	0.1163	194.099	8.54049	597.528	14118	0.71429
