# Supplementary material for: Comprehensive Molecular Characterization and Identification of Prognostic Signature in Stomach Adenocarcinoma on The Basis of Energy-Metabolism-Related Genes
Source: Research Square preprint supplement (doi:10.21203/rs.3.rs-138125/v1), 2021-01-14
Supplement: Supplementary file 10 [file 8261a07073647abf00e1124c.xlsx]

## Sheet: Sheet1
Supplementary Table S2. EMRGs significantly associated with the prognosis of STAD patients
Gene	P value	Harzard ratio	Low 95%CI	High 95%CI
AADAC	0.00304222	1.00526	1.00178	1.00876
ABO	0.0218932	0.987709	0.977319	0.998209
ACADL	0.0137629	1.41462	1.07346	1.86421
ACADM	0.0256975	0.979027	0.960963	0.99743
ACADS	0.0161928	0.988487	0.979201	0.997861
ACOT12	0.00907609	2.46478	1.25165	4.85373
ACSM2A	0.0477356	1.43598	1.00362	2.05459
ACSM6	0.0259809	1.86304	1.07733	3.22179
ACSS2	0.0376187	0.992049	0.98461	0.999543
ADH4	0.0458477	1.0019	1.00003	1.00376
AKR1A1	0.00652245	0.991844	0.986008	0.997714
AKR1B1	0.000920162	1.00984	1.00401	1.01571
BCAN	0.0184796	0.837916	0.723281	0.97072
BGN	0.0480695	1.00027	1	1.00053
CES2	0.0320981	0.997587	0.995385	0.999793
CES3	0.00724527	0.972747	0.953326	0.992564
CHST12	0.0447011	1.08055	1.00183	1.16545
CHST14	0.00981277	1.02426	1.00579	1.04307
CHST9	0.0181203	1.12981	1.02104	1.25017
CRYL1	0.011201	0.989223	0.980975	0.997541
CYB5B	0.00596387	0.988678	0.980685	0.996735
CYP11A1	0.00495324	1.39558	1.10609	1.76083
CYP11B1	0.0157217	4.33168	1.31834	14.2327
CYP1A2	0.0421881	1.80369	1.02103	3.18629
CYP1B1	0.0262743	1.00654	1.00077	1.01234
CYP21A2	0.0147684	1.67009	1.1058	2.52234
CYP26C1	0.0076259	7.5986	1.71308	33.7046
CYP3A43	0.00467671	2.4892	1.32317	4.68276
CYP46A1	0.000363053	2.31509	1.45938	3.67255
CYP4A11	0.0257775	1.25491	1.02784	1.53216
CYP4F3	0.0102182	1.01489	1.00351	1.0264
DECR1	0.018517	0.988702	0.979396	0.998095
DLAT	0.0467395	0.988019	0.976351	0.999826
DPEP2	0.0245124	1.09088	1.01124	1.1768
DSEL	0.0365365	1.07848	1.00474	1.15764
FDX2	0.0198687	1.08053	1.01234	1.15332
FUT10	0.0370123	0.937072	0.88155	0.996092
FUT3	0.0343683	0.994968	0.990329	0.999629
FUT4	0.0468624	0.989216	0.978696	0.99985
FUT5	0.0045527	35.0153	3.00212	408.401
GAPDHS	0.0337268	6.65472	1.15699	38.2765
GCK	0.00268349	1.21327	1.0694	1.37649
GGT5	0.00823201	1.0071	1.00183	1.0124
GLB1L	0.00264442	1.03573	1.01229	1.05971
GOT1	0.00722866	0.991186	0.984804	0.99761
GSTM4	0.0391388	0.987059	0.974918	0.999351
GYS2	0.0426778	1.1329	1.00413	1.27818
HADH	0.00234167	0.986307	0.977588	0.995105
IDS	0.0347908	1.00656	1.00047	1.01269
KHK	0.0301915	0.960991	0.92703	0.996196
L2HGDH	0.0224875	0.922361	0.860509	0.988659
MAT1A	7.78227e-06	1.04549	1.0253	1.06608
MCAT	0.0444168	0.978776	0.958515	0.999465
ME2	0.0284974	0.97606	0.955124	0.997454
MPC1	0.0388946	0.99178	0.984042	0.999579
NDC1	0.0282318	0.988562	0.978454	0.998773
NDST3	0.0246761	4.02386	1.19428	13.5575
NNMT	0.0139716	1.0031	1.00063	1.00558
NUP50	0.028436	0.982112	0.966382	0.998097
OPLAH	0.0123245	0.990742	0.983552	0.997985
PC	0.00936748	1.03215	1.0078	1.05708
PDHA1	0.0244392	0.988776	0.979102	0.998545
PFKFB1	0.000372308	1.43079	1.17462	1.74282
PFKFB4	0.042977	0.945093	0.894796	0.998217
PGK1	0.0295871	0.997659	0.995555	0.999768
PGM2	0.022859	0.982775	0.968179	0.997592
PHKG1	0.0120732	1.10241	1.02159	1.18961
PPP2R5D	0.0394673	0.992625	0.985657	0.999643
PRPS1L1	0.0356358	2.45576	1.06219	5.67765
RHCE	0.0261686	1.54242	1.05274	2.25987
RPEL1	0.00357041	2.35341	1.32336	4.18522
SDHA	0.0226204	0.989699	0.980927	0.998548
SDHD	0.0191193	0.993609	0.988295	0.998952
SGSH	0.0204635	1.03014	1.00459	1.05633
SLC25A13	0.0414777	1.00622	1.00024	1.01223
SLC35D2	0.0142602	0.987588	0.977772	0.997502
ST3GAL6	0.0329882	1.07841	1.00612	1.15589
STAB2	0.0383246	1.24409	1.01182	1.52968
SULT2A1	0.00512356	1.00583	1.00174	1.00992
TPMT	0.02368	0.990759	0.982822	0.99876
UGT1A4	0.00238421	4.87793	1.75457	13.5613
UGT1A7	0.00268794	1.1296	1.04319	1.22317
UGT2B10	0.0171685	1.26373	1.04243	1.532
UGT2B28	0.0396126	1.41737	1.01672	1.97591
UGT3A2	0.00309598	1.02943	1.00984	1.04941
VCAN	0.0458872	1.00441	1.00008	1.00876
