# Supplementary material for: Comprehensive Molecular Characterization and Identification of Prognostic Signature in Stomach Adenocarcinoma on The Basis of Energy-Metabolism-Related Genes
Source: Research Square preprint supplement (doi:10.21203/rs.3.rs-138125/v1), 2021-01-14
Supplement: Supplementary file 11 [file bd76674fab2938430fb5aa48.xlsx]

## Sheet: S8_Table
Supplementary Table 3. The correlation between clinical phenotypes and the obtained modules as well as the genes of the modules
Genes	GS.Gender	GS.Age	GS.T	GS.N	GS.M	GS.Stage	GS.Cluster1	GS.Cluster2	p.GS.Gender	p.GS.Age	p.GS.T	p.GS.N	p.GS.M	p.GS.Stage	p.GS.Cluster1	p.GS.Cluster2	Module
RAB4B	-0.00186909	0.0642772	-0.0688144	-0.0965681	-0.019548	-0.0688642	0.0566054	-0.0566054	0.972649	0.237873	0.206293	0.0758002	0.719878	0.205963	0.298712	0.298712	grey
TIGAR	-0.0738432	0.0564691	0.187373	0.00905394	-0.0279897	0.0910696	-0.0589429	0.0589429	0.174963	0.299879	0.000524487	0.868087	0.607572	0.0941197	0.27917	0.27917	blue
RNF44	0.0459468	0.0704464	-0.0187625	0.0175227	0.0438972	0.0720656	-0.0365214	0.0365214	0.399065	0.195709	0.73069	0.747862	0.420452	0.185606	0.50275	0.50275	turquoise
RPL23A	-0.0738876	-0.0232725	-0.0345756	-0.0428681	0.0130154	0.0392057	0.0201719	-0.0201719	0.174703	0.669403	0.525792	0.431439	0.811288	0.471855	0.71133	0.71133	grey
ARL8B	-0.0194104	-0.0277771	0.120848	0.0527893	-0.0044896	0.0482437	0.0384453	-0.0384453	0.721768	0.610304	0.0260819	0.332526	0.934363	0.37589	0.4805	0.4805	turquoise
CALB2	0.00446001	-0.0031687	-0.0245787	0.0433658	0.0525556	0.0452336	-3.96905e-05	3.96905e-05	0.934794	0.953648	0.652034	0.426105	0.334673	0.406433	0.999419	0.999419	purple
MFSD3	-0.0201472	0.103161	-0.089501	-0.0423612	-0.0128934	-0.00153931	-0.219135	0.219135	0.711668	0.0577699	0.0999482	0.436911	0.813025	0.977473	4.71389e-05	4.71389e-05	grey
PIGV	0.0594952	0.00173388	0.0243547	-0.0125362	0.028433	0.0305913	-0.0880691	0.0880691	0.274682	0.974627	0.654999	0.818114	0.601895	0.574595	0.105516	0.105516	blue
ZNF708	0.0729162	-0.0055183	0.116405	0.053378	0.07074	0.0723663	0.000766081	-0.000766081	0.180455	0.919369	0.0321437	0.327155	0.193848	0.183773	0.988788	0.988788	turquoise
MOGAT2	0.0211653	-0.00869596	0.0110723	-0.0707372	-0.0369166	-0.0365923	-0.15569	0.15569	0.697796	0.873258	0.839044	0.193866	0.498135	0.50192	0.00405936	0.00405936	grey
PFN2	-0.0173523	0.036272	-0.0827829	0.01266	-0.00651121	-0.0765543	0.077159	-0.077159	0.750232	0.505673	0.128215	0.816349	0.904925	0.159613	0.156332	0.156332	orange
RMND5A	0.0494765	-0.0121059	0.0737514	0.0874825	-0.0501402	0.0514117	-0.185517	0.185517	0.363799	0.824253	0.175501	0.107866	0.357391	0.345314	0.000597015	0.000597015	turquoise
RAD23A	0.0108867	0.0817261	-0.0670296	-0.134558	0.0174658	-0.0682974	-0.00377995	0.00377995	0.841706	0.133176	0.218333	0.0131523	0.748653	0.20973	0.944719	0.944719	blue
SIN3B	0.08215	0.0135175	0.112329	0.0920181	0.100092	0.120854	0.150714	-0.150714	0.131169	0.804153	0.0387247	0.0907289	0.0656642	0.0260741	0.00542608	0.00542608	turquoise
TLL2	0.079715	-0.0245076	-0.0696774	0.0304065	-0.0208477	0.0019259	-0.0205458	0.0205458	0.143025	0.652975	0.200646	0.57691	0.702112	0.971818	0.706224	0.706224	purple
CTSA	-0.00546655	0.0189883	0.0644274	-0.0416357	-0.0422816	0.0142275	-0.0451462	0.0451462	0.920123	0.727577	0.236777	0.444811	0.437774	0.794091	0.407341	0.407341	grey
IL32	-0.0786806	0.0616027	0.104805	-0.075619	-0.0503033	0.0543839	0.0545443	-0.0545443	0.148302	0.258009	0.053873	0.16479	0.355828	0.318107	0.31668	0.31668	tan
PTPN4	-0.00111183	0.0168269	0.146998	0.0722125	0.0203552	0.0879512	-0.104072	0.104072	0.983728	0.757555	0.00670276	0.184709	0.708825	0.105985	0.0555834	0.0555834	turquoise
NUCB2	0.0246737	-0.003007	0.0919033	0.0488888	-0.0650668	0.0236079	-0.0634663	0.0634663	0.650777	0.956011	0.091134	0.369532	0.232146	0.664925	0.243858	0.243858	grey
TMEM143	0.11206	-0.0306579	0.0310168	0.00665148	0.0255074	0.0175153	-0.096129	0.096129	0.0391965	0.573762	0.569284	0.902887	0.639797	0.747965	0.0771478	0.0771478	blue
DACH1	0.0939958	0.0759767	-0.089022	-0.0810618	-0.0112316	-0.11664	-0.111264	0.111264	0.0839736	0.162795	0.101784	0.13637	0.836761	0.0317958	0.0406206	0.0406206	black
SERTAD2	-0.0513155	0.00552722	0.0405286	0.0526133	0.0251346	0.0306067	0.102251	-0.102251	0.346219	0.919239	0.457022	0.334142	0.644698	0.574403	0.0600242	0.0600242	turquoise
ST3GAL6	-0.0544808	-0.0696056	0.10429	0.062509	-0.000339298	0.0427504	0.142643	-0.142643	0.317245	0.201111	0.0550689	0.251058	0.995034	0.432705	0.00853621	0.00853621	grey
PKP2	-0.0801646	0.0960241	0.0742513	0.00424349	-0.00558206	0.0530365	-0.274505	0.274505	0.140776	0.0774727	0.172585	0.937953	0.918441	0.330263	2.82934e-07	2.82934e-07	blue
SLC45A4	-0.0671776	0.102761	-0.00497549	0.104216	-0.017905	0.1149	-0.23188	0.23188	0.217316	0.0587518	0.927278	0.055243	0.742553	0.0344536	1.61402e-05	1.61402e-05	turquoise
MTRF1	0.0605113	0.0870649	0.0667938	0.0451006	0.029535	0.0901752	-0.232215	0.232215	0.266553	0.109565	0.219961	0.407815	0.587883	0.0974087	1.56792e-05	1.56792e-05	turquoise
ESM1	0.164512	0.119152	-0.0409144	-0.0983108	0.0147038	-0.0226226	-0.074238	0.074238	0.00237737	0.0282689	0.452745	0.0706393	0.78736	0.678112	0.172662	0.172662	grey60
RWDD2A	-0.0289767	0.0763358	0.0838241	-0.0036069	-0.00525383	-0.0289944	-0.0724416	0.0724416	0.594962	0.160812	0.123468	0.947246	0.923222	0.594738	0.183316	0.183316	turquoise
SCFD2	-0.00446742	-0.00764079	0.0312698	0.0169448	-0.0036303	0.0671104	-0.121135	0.121135	0.934686	0.88853	0.566136	0.755909	0.946905	0.217777	0.0257269	0.0257269	blue
YWHAB	0.0192176	0.0967577	0.0860513	0.0824284	0.0696361	0.0927577	-0.146699	0.146699	0.724419	0.0752242	0.113774	0.129863	0.200913	0.0881532	0.00681605	0.00681605	grey
TOMM40	-0.079919	0.0962294	-0.0516423	-0.0195396	-0.0283188	0.0209992	-0.197117	0.197117	0.142001	0.0768379	0.343152	0.719993	0.603354	0.700051	0.000260416	0.000260416	blue
PRSS48	0.0589607	0.0189905	0.0154099	0.040743	0.0135779	-0.0298987	-0.0055225	0.0055225	0.279024	0.727546	0.777411	0.454642	0.803295	0.583292	0.919308	0.919308	grey
ADTRP	0.0891256	0.015888	-0.0421082	-0.00500197	-0.0423672	-0.0208784	-0.194402	0.194402	0.101385	0.770695	0.439656	0.926892	0.436846	0.701695	0.000317589	0.000317589	grey
NDUFAF2	-0.0746725	-0.0110281	0.109491	0.00363769	-0.0678182	0.045341	0.0317146	-0.0317146	0.170156	0.839679	0.0439504	0.946797	0.212953	0.405318	0.560622	0.560622	grey
SEPSECS	0.0288794	0.143734	0.0857302	0.055243	-0.0104779	0.0985006	-0.22956	0.22956	0.596201	0.00803899	0.115134	0.310512	0.847577	0.070095	1.9709e-05	1.9709e-05	turquoise
CWC27	0.0320434	-0.0613047	0.13334	0.0294731	-0.0221338	0.0548398	0.0132553	-0.0132553	0.556564	0.260323	0.014012	0.588666	0.68469	0.314062	0.807877	0.807877	turquoise
MAP9	-0.040057	-0.124648	0.148954	0.0878334	0.0523151	0.0813121	0.248894	-0.248894	0.46228	0.0217048	0.00600046	0.106455	0.336893	0.13516	3.5025e-06	3.5025e-06	brown
APIP	0.0311008	0.0457483	0.158865	0.0644031	-0.0149341	0.0252981	-0.0381282	0.0381282	0.568237	0.401107	0.0033585	0.236954	0.784112	0.642547	0.48413	0.48413	grey
MAF1	-0.0728782	0.0563728	-0.0638258	-0.0754273	-0.0690076	-0.0490114	0.0420808	-0.0420808	0.180683	0.300705	0.241192	0.165867	0.205018	0.368332	0.439954	0.439954	grey
FOXP1	-0.02662	-0.126914	0.124374	0.0338509	0.0186113	-0.00939183	0.248972	-0.248972	0.625265	0.0194102	0.021998	0.534509	0.732777	0.863212	3.47744e-06	3.47744e-06	brown
PLCE1	0.0229737	0.000782245	0.0989333	0.0320853	0.0259283	0.0540681	-0.0208085	0.0208085	0.673402	0.988551	0.0688667	0.556047	0.634283	0.32093	0.702646	0.702646	turquoise
RAD17	0.00339412	0.0682985	0.0873734	0.121004	0.0326375	0.102553	-0.0705077	0.0705077	0.950354	0.209722	0.108308	0.0258878	0.549266	0.0592675	0.19532	0.19532	turquoise
SPCS2	-0.0577668	0.0939952	0.0872763	0.0491617	-0.115253	0.0638224	-0.0266639	0.0266639	0.288891	0.0839756	0.108702	0.366863	0.0338997	0.241217	0.624694	0.624694	grey
SETDB2	0.0709083	0.0542391	0.119353	0.00916021	-0.0262784	0.0356378	-0.0776378	0.0776378	0.192787	0.3194	0.0280019	0.866553	0.629712	0.513146	0.153771	0.153771	turquoise
DESI2	-0.00358094	-0.0202016	0.153784	0.00669905	-0.0101658	0.0329955	0.00152461	-0.00152461	0.947626	0.710925	0.00454103	0.902195	0.852063	0.544891	0.977688	0.977688	turquoise
COX17	-0.0306699	0.00223183	-0.0651274	-0.0200214	-0.0974527	0.0183955	-0.0109667	0.0109667	0.573613	0.967343	0.23171	0.713389	0.0731434	0.735759	0.840559	0.840559	royalblue
NLGN2	-0.0490521	-0.106988	0.108133	0.0572318	0.0486574	0.0166677	0.515025	-0.515025	0.367934	0.0490419	0.0466549	0.293388	0.371804	0.759777	2.32786e-24	2.32786e-24	brown
PKMYT1	-0.0646572	0.109253	-0.0438251	-0.0700034	0.00496283	0.0105865	-0.243818	0.243818	0.235105	0.044416	0.421217	0.198542	0.927462	0.846017	5.59096e-06	5.59096e-06	blue
FAM89B	-0.0506539	-0.00809231	0.00748483	-0.0374305	-0.0636726	-0.036267	0.342111	-0.342111	0.35248	0.88199	0.890791	0.492169	0.242325	0.505731	9.67238e-11	9.67238e-11	grey
MED8	-0.0623707	0.0750559	-0.0175179	0.00325972	-0.0576642	0.0128837	-0.12908	0.12908	0.252109	0.167967	0.747928	0.952318	0.28975	0.813164	0.0174169	0.0174169	blue
PHF1	-0.0241681	-0.0495384	0.0628038	0.0338358	0.0578482	0.0341338	0.343208	-0.343208	0.657474	0.363198	0.248825	0.534692	0.288211	0.531097	8.35303e-11	8.35303e-11	brown
DIPK1A	0.0429982	-0.06528	0.145915	0.0837689	0.0567671	-0.0722612	0.293312	-0.293312	0.430041	0.230617	0.00712203	0.123716	0.297331	0.184412	3.75555e-08	3.75555e-08	brown
ANKMY1	0.0543231	0.104476	0.0848441	0.0908796	0.136405	0.109583	-0.102601	0.102601	0.318649	0.0546347	0.118952	0.0948106	0.0119381	0.043773	0.0591485	0.0591485	turquoise
PSMB6	-0.0885037	0.0898131	0.018072	-0.0406401	-0.0782444	0.00862272	-0.0230856	0.0230856	0.103801	0.0987661	0.740238	0.455783	0.150571	0.874317	0.671903	0.671903	blue
GUCY1A1	0.00281294	-0.135197	0.201119	0.111899	0.0484355	0.0217412	0.509592	-0.509592	0.958847	0.0127207	0.000193415	0.0394805	0.373992	0.689991	8.38981e-24	8.38981e-24	brown
PRKG2	0.00347379	-0.00683034	-0.104832	-0.0289757	0.0227117	-0.137027	0.0952013	-0.0952013	0.949191	0.900289	0.053811	0.594975	0.676916	0.0115522	0.0800588	0.0800588	grey
FBXO45	0.00349767	0.00291321	0.0944887	-0.0105243	-0.0357122	0.0940629	-0.195059	0.195059	0.948842	0.957381	0.0823548	0.84691	0.512267	0.0837517	0.00030278	0.00030278	turquoise
AMZ2	-0.0695047	-0.000181102	-0.0620189	-0.00892458	0.0272463	-0.0591634	0.0160325	-0.0160325	0.201766	0.997349	0.2548	0.869955	0.617147	0.277372	0.768668	0.768668	grey
TMEM52	-0.120305	0.103277	1.67956e-05	-0.0739957	-0.00529306	-0.0397627	-0.234502	0.234502	0.026765	0.0574868	0.999754	0.174071	0.92265	0.465578	1.28486e-05	1.28486e-05	grey
CHN2	0.159808	-0.00760351	0.0367246	-0.0653247	-0.0300847	-0.104995	-0.0940417	0.0940417	0.00317258	0.889071	0.500374	0.230297	0.580951	0.0534375	0.0838219	0.0838219	grey
GCNT4	0.0678075	-0.0467424	-0.107055	-0.000353736	-0.0737201	0.00268645	-0.113815	0.113815	0.213025	0.390943	0.0488997	0.994823	0.175685	0.960696	0.0362045	0.0362045	grey
KLK8	0.0417328	-0.00892165	-0.0518272	-0.0356524	0.00610635	0.029185	0.0221382	-0.0221382	0.443748	0.869998	0.341425	0.512974	0.910811	0.592317	0.684632	0.684632	pink
MTF2	0.0584779	0.025938	0.105507	0.0888814	-0.00055223	0.101773	-0.19994	0.19994	0.282986	0.634156	0.0522777	0.102328	0.991918	0.0612368	0.000211248	0.000211248	turquoise
RBM15B	0.00831137	0.0463328	0.0148467	-0.0116785	0.0276763	0.0477885	-0.0599928	0.0599928	0.878819	0.395112	0.785343	0.830363	0.611601	0.380415	0.27068	0.27068	turquoise
PIH1D2	0.078248	-0.087701	0.0285813	-0.0236488	-0.0327168	0.0481349	-0.0785858	0.0785858	0.150553	0.106986	0.599999	0.664381	0.548296	0.376968	0.148793	0.148793	grey
MT1A	-0.182728	-0.0296083	-0.0556635	0.0378599	-0.00606816	-0.0155795	0.0505612	-0.0505612	0.000723666	0.586956	0.306837	0.487213	0.911367	0.775025	0.353363	0.353363	lightyellow
ATP2A1	0.207052	0.0495262	0.0233993	0.00981737	0.0584382	0.0315796	-0.141108	0.141108	0.000123112	0.363316	0.66771	0.857079	0.283314	0.562292	0.00928136	0.00928136	turquoise
NCAPG	-0.106714	0.0742907	0.0817376	0.0295567	-0.0344008	0.112583	-0.328626	0.328626	0.0496273	0.172356	0.133122	0.587608	0.527888	0.0382825	5.59744e-10	5.59744e-10	blue
FANK1	0.0589429	0.00370961	-0.143965	-0.107427	0.0377604	-0.0851345	0.0136906	-0.0136906	0.27917	0.945746	0.00793738	0.0481149	0.488358	0.11769	0.801697	0.801697	purple
NOP2	-0.109583	0.152378	0.0476463	-0.0678624	-0.0229609	0.0683041	-0.242726	0.242726	0.043772	0.00492872	0.381836	0.212654	0.673574	0.209685	6.17421e-06	6.17421e-06	blue
ZNF880	0.0204939	-0.0257141	0.0902817	0.0476522	0.0738917	0.0632402	0.208675	-0.208675	0.706933	0.637087	0.0970125	0.381778	0.174679	0.245545	0.000108558	0.000108558	grey
MELTF	0.0875762	0.0557754	-0.0299505	-0.0503323	0.0665911	0.022794	-0.0115356	0.0115356	0.107488	0.305864	0.58264	0.355549	0.221367	0.675811	0.832407	0.832407	purple
PTPRB	0.0221875	-0.0269173	0.201145	0.115401	0.0733523	0.142378	0.14801	-0.14801	0.683966	0.621406	0.000193037	0.0336697	0.177856	0.00866071	0.00633069	0.00633069	yellow
DGKD	0.0758944	0.0278807	-0.0110928	0.060644	0.0404062	0.0876288	-0.171195	0.171195	0.163253	0.608972	0.838751	0.265504	0.458383	0.107276	0.00155733	0.00155733	turquoise
TMCO1	0.0633238	0.0241947	-0.0565868	-0.0286032	0.0637782	-0.0162457	-0.143086	0.143086	0.244921	0.657121	0.298871	0.59972	0.241544	0.76568	0.00833101	0.00833101	grey
RAB5C	-0.00409498	0.00499731	0.0724465	-0.0681848	0.121622	0.00519144	0.0537649	-0.0537649	0.940121	0.926959	0.183287	0.210484	0.0251334	0.92413	0.323655	0.323655	grey
UPP1	-0.00320209	0.077432	-0.0551259	0.0258701	0.0300903	0.0439533	-0.0384816	0.0384816	0.95316	0.154868	0.31154	0.635044	0.58088	0.419859	0.480084	0.480084	purple
TRABD2B	0.0935786	-0.126972	0.0539333	0.0720482	-0.0287512	0.00964673	0.337986	-0.337986	0.0853639	0.0193544	0.32214	0.185713	0.597832	0.859537	1.66994e-10	1.66994e-10	salmon
AMN	0.0114797	0.0327664	-0.0301908	0.0701859	-0.0751103	0.0200727	-0.228333	0.228333	0.833207	0.547689	0.579616	0.197372	0.167658	0.712687	2.18853e-05	2.18853e-05	grey
KLK10	0.00388632	0.0362665	-0.0302078	-0.0019896	0.0247033	0.0290819	0.0826162	-0.0826162	0.943166	0.505737	0.579404	0.970886	0.650387	0.593625	0.128988	0.128988	pink
KDM5B	0.0384899	-0.00767252	0.0687848	0.129045	0.0307054	0.074895	-0.0421331	0.0421331	0.47999	0.88807	0.206488	0.0174472	0.573168	0.168882	0.439386	0.439386	turquoise
STPG1	-0.040032	0.0163329	-0.0613843	-0.009747	0.033718	0.0153165	0.0277667	-0.0277667	0.462559	0.76446	0.259703	0.858093	0.536116	0.778725	0.610437	0.610437	grey
FHOD1	0.039235	0.170708	0.0648327	0.03524	0.0828676	0.0861423	-0.0585192	0.0585192	0.471524	0.00160689	0.233834	0.517864	0.127824	0.113391	0.282646	0.282646	red
PTPRH	-0.0146711	0.11244	-0.0715596	0.0229448	-0.00622192	0.0187711	-0.280419	0.280419	0.787822	0.0385317	0.188721	0.673789	0.90913	0.730571	1.52347e-07	1.52347e-07	grey
PCMTD1	0.026237	-0.0217421	0.143343	0.0875516	-0.00847676	0.000663854	0.116769	-0.116769	0.630251	0.68998	0.00821416	0.107587	0.876427	0.990284	0.0316051	0.0316051	turquoise
MAP2K7	0.00327301	0.0391081	0.0110566	-0.0671033	-0.00245344	-0.026162	0.096218	-0.096218	0.952124	0.47296	0.83927	0.217826	0.964103	0.631229	0.076873	0.076873	black
SMIM32	0.0514902	0.0105481	-0.0555413	0.0362835	-0.0372569	-0.0418517	0.0131568	-0.0131568	0.344577	0.846569	0.307902	0.505537	0.49418	0.442451	0.809278	0.809278	grey
AP5S1	0.118796	-0.0635315	0.0209589	-0.0136237	-0.0236631	0.0294162	0.00433337	-0.00433337	0.0287476	0.243373	0.700599	0.802646	0.66419	0.589386	0.936642	0.936642	grey
GRIP1	0.0403497	0.0429323	0.0358638	0.0151403	-0.00623275	0.0553783	0.133521	-0.133521	0.459012	0.430749	0.510477	0.781205	0.908973	0.309326	0.0138807	0.0138807	white
VRK3	-0.00847172	0.00522302	0.0221833	0.0333224	0.0227557	0.0681776	-0.111975	0.111975	0.8765	0.92367	0.684024	0.540912	0.676325	0.210532	0.0393461	0.0393461	grey
SLC2A1	0.0288643	0.0286542	-0.030085	0.00912537	0.0847009	0.0601305	-0.0116364	0.0116364	0.596392	0.599069	0.580946	0.867056	0.119578	0.26958	0.830965	0.830965	grey
MUSK	0.0180052	-0.0697624	0.0556514	0.0622159	-0.0129626	0.053757	0.187596	-0.187596	0.741163	0.200095	0.306943	0.253291	0.812039	0.323726	0.000516342	0.000516342	grey
SPINK1	-0.011983	-0.0806968	-0.0224508	0.0384287	-0.0188034	-0.0363471	0.0362311	-0.0362311	0.826009	0.13815	0.680421	0.48069	0.730125	0.504792	0.506154	0.506154	grey
GLYCTK	0.0133023	0.0292642	-0.071056	0.0185477	0.00268187	0.0340613	-0.262324	0.262324	0.807209	0.591312	0.19186	0.733655	0.960763	0.531971	9.67718e-07	9.67718e-07	grey
MASP2	0.0926319	-0.0719644	-0.0118009	0.043988	0.0443022	-0.0215629	0.085227	-0.085227	0.0885871	0.186226	0.828612	0.419491	0.416174	0.692405	0.11729	0.11729	turquoise
RPRM	-0.0221995	-0.196414	-0.0167803	-0.0113725	0.0083507	-0.0527215	0.236232	-0.236232	0.683805	0.00027421	0.758206	0.834743	0.87825	0.333147	1.10361e-05	1.10361e-05	brown
TNNT1	-0.157132	0.0663553	-0.0584435	-0.0976315	0.0873712	-0.0393738	-0.00024913	0.00024913	0.00372615	0.223011	0.28327	0.0726157	0.108317	0.469956	0.996354	0.996354	grey
MT-ND1	0.0379423	0.0337861	-0.0592155	-0.0843927	-0.0133505	-0.122184	-0.0523162	0.0523162	0.486265	0.535293	0.276948	0.120934	0.806525	0.0244628	0.336882	0.336882	blue
PPOX	-0.023647	0.0413877	0.0228789	0.0100558	0.0570339	0.00217627	-0.0746424	0.0746424	0.664405	0.44753	0.674672	0.853646	0.295063	0.968156	0.170328	0.170328	grey
H6PD	0.101024	-0.0783335	0.0261524	0.0765952	0.10492	0.0466297	0.195484	-0.195484	0.0631794	0.150106	0.631355	0.15939	0.0536093	0.392087	0.000293524	0.000293524	turquoise
RCOR1	-0.0870626	0.0257517	0.0598989	0.010989	-0.00550681	0.0850741	-0.244659	0.244659	0.109574	0.636594	0.271432	0.84024	0.919537	0.117951	5.17759e-06	5.17759e-06	turquoise
GRAMD1C	0.160899	0.100219	-0.007866	0.0376583	0.0202582	0.0625199	-0.228679	0.228679	0.00296921	0.0653218	0.885267	0.489536	0.710152	0.250975	2.12492e-05	2.12492e-05	turquoise
RPS6KB1	-0.0490218	0.0676747	0.094323	0.00463838	-0.0137881	0.0402529	0.00784157	-0.00784157	0.36823	0.213924	0.0828962	0.932193	0.800314	0.460091	0.885621	0.885621	turquoise
GLI3	-0.00827721	-0.15188	0.127189	0.0444569	0.0512097	-0.0318432	0.517864	-0.517864	0.879314	0.00507298	0.0191463	0.414547	0.347215	0.559033	1.18021e-24	1.18021e-24	brown
KCNE4	-0.0476988	-0.157485	0.189317	0.0640546	0.0523882	0.0366296	0.572764	-0.572764	0.381311	0.00364854	0.000457339	0.239506	0.336217	0.501484	6.06113e-31	6.06113e-31	yellow
HOXC13	-0.0581284	0.0272409	-0.0251547	0.0135054	-0.0444679	0.0418903	0.0279639	-0.0279639	0.285878	0.617217	0.644434	0.804324	0.414431	0.442029	0.607903	0.607903	grey
FAM217B	0.0581062	-0.00768018	0.129921	0.0820286	0.0247	0.0999057	-0.00863131	0.00863131	0.286063	0.887959	0.0166924	0.131742	0.65043	0.0661709	0.874193	0.874193	turquoise
FCGR2B	-0.0673089	-0.166116	0.140608	0.0897457	0.00833284	0.0302918	0.434039	-0.434039	0.216416	0.00215082	0.00953645	0.0990205	0.878509	0.578348	5.24769e-17	5.24769e-17	green
LAMTOR4	-0.00235636	0.0314983	-0.0736478	0.0123205	-0.062558	-0.0290051	-0.0237905	0.0237905	0.965522	0.563301	0.17611	0.82119	0.250686	0.594601	0.662494	0.662494	royalblue
PHYKPL	0.115531	0.0634957	0.0591533	0.114246	0.0847139	0.115872	0.00435039	-0.00435039	0.0334682	0.243639	0.277454	0.0355	0.119521	0.0329469	0.936393	0.936393	turquoise
KIAA1328	-0.0255362	0.0226466	0.147389	-0.00670538	-0.0280383	-0.00209956	0.0291914	-0.0291914	0.639419	0.677789	0.00655685	0.902104	0.606948	0.969278	0.592235	0.592235	turquoise
NME1-NME2	-0.148449	0.147274	0.0874509	-0.00727505	-0.0317591	0.0500557	-0.105987	0.105987	0.00617521	0.00659952	0.107994	0.893834	0.560072	0.358203	0.0512092	0.0512092	blue
PHLDA2	-0.0496232	0.0881546	0.0906483	0.0108798	-0.0167827	0.0880279	0.00429769	-0.00429769	0.362376	0.105176	0.0956578	0.841805	0.758171	0.105679	0.937162	0.937162	grey
CBL	-0.0164213	2.23015e-05	0.118718	0.0527183	-0.0135088	0.082998	-0.0044505	0.0044505	0.763223	0.999674	0.0288522	0.333177	0.804277	0.127224	0.934933	0.934933	turquoise
CLN6	-0.0414915	0.0713122	0.0157619	-0.0979074	0.0183654	0.0200081	-0.13777	0.13777	0.44639	0.190258	0.772463	0.0718076	0.736175	0.713571	0.0111057	0.0111057	blue
EFS	-0.0224078	-0.0667099	-0.07215	-0.0407578	-0.0231963	-0.0656966	0.301026	-0.301026	0.680999	0.220542	0.18509	0.454479	0.670422	0.227648	1.57052e-08	1.57052e-08	pink
ERRFI1	-0.0843427	0.00593943	0.040866	0.0337239	0.0544291	0.0528156	0.16349	-0.16349	0.121156	0.913239	0.45328	0.536044	0.317705	0.332284	0.00253275	0.00253275	grey
EVPL	0.0688651	0.0374786	-0.130552	-0.0668969	0.0391029	-0.041995	-0.148578	0.148578	0.205957	0.491612	0.0161666	0.219248	0.473018	0.440888	0.00613031	0.00613031	pink
IL27RA	0.0588517	-0.0362773	0.0491801	-0.0233782	0.0834643	0.0305666	0.0344572	-0.0344572	0.279915	0.505611	0.366684	0.667991	0.125093	0.574905	0.527211	0.527211	green
WDR70	-0.0139166	0.0517957	0.0508393	-0.0373565	0.0160233	0.0078449	-0.0103147	0.0103147	0.798493	0.341718	0.350719	0.493025	0.768796	0.885573	0.849923	0.849923	turquoise
OTUD1	-0.0902847	-0.0573008	0.157782	0.0306306	-0.012238	0.0817787	0.0992321	-0.0992321	0.0970014	0.292805	0.00358423	0.574103	0.822367	0.132926	0.0680291	0.0680291	turquoise
TTC5	0.0384326	0.00269123	0.144766	0.127471	0.0239911	0.158543	-0.0702742	0.0702742	0.480645	0.960626	0.0075929	0.0188796	0.659825	0.00342433	0.196807	0.196807	turquoise
PDCD6	-0.0640158	0.216275	-0.0630906	-0.0982843	-0.00546225	-0.0383019	-0.235782	0.235782	0.239791	5.94561e-05	0.246667	0.0707155	0.920186	0.482139	1.14825e-05	1.14825e-05	grey
MRPS11	-0.0695153	-0.0423266	-0.041511	-0.0428123	-0.0495694	0.0375018	-0.0385757	0.0385757	0.201697	0.437285	0.446177	0.432039	0.362897	0.491344	0.479011	0.479011	grey
EPB41L2	-0.0469806	-0.020109	0.19814	0.0974032	0.086963	0.132738	0.145484	-0.145484	0.38853	0.71219	0.000241478	0.07329	0.109982	0.0144544	0.00729557	0.00729557	grey
EPHA3	-0.00111736	-0.179252	0.177938	0.0836499	0.0401053	0.00986239	0.362059	-0.362059	0.983647	0.000916195	0.00100053	0.124253	0.46174	0.856431	6.14377e-12	6.14377e-12	brown
C1orf35	-0.0357099	0.0217963	-0.0234491	-0.0600698	0.0563802	0.00697595	-0.0892627	0.0892627	0.512295	0.689246	0.667044	0.270065	0.300641	0.898174	0.100858	0.100858	blue
LDHA	-0.157032	0.0995683	0.0716458	-1.04549e-05	0.0656931	0.0757054	-0.0826575	0.0826575	0.00374836	0.0670964	0.188188	0.999847	0.227673	0.164307	0.128796	0.128796	blue
XCL1	-0.0475674	0.00259359	-0.0551903	0.0131161	0.0248984	0.0253482	-0.00956549	0.00956549	0.382626	0.962054	0.310974	0.809857	0.647811	0.641888	0.860708	0.860708	grey
UBE3A	-0.0232906	-0.0428396	0.215287	0.0779231	0.0138657	0.162178	-0.0595852	0.0595852	0.669162	0.431746	6.43754e-05	0.15226	0.799214	0.00274597	0.273955	0.273955	turquoise
DNMT3A	0.0636707	-0.061251	0.0503557	0.0758959	0.0311034	0.0610867	0.0340096	-0.0340096	0.24234	0.260741	0.355325	0.163245	0.568205	0.262024	0.532594	0.532594	turquoise
PDE5A	0.0290845	-0.0540731	0.107421	0.0470368	0.0231475	-0.0254469	0.339102	-0.339102	0.593592	0.320885	0.0481258	0.387962	0.671075	0.640592	1.44171e-10	1.44171e-10	brown
ZNF304	0.0359471	-0.0133568	0.063313	0.106133	0.0898063	0.093171	0.0761877	-0.0761877	0.509495	0.806435	0.245001	0.0508881	0.0987918	0.08674	0.161627	0.161627	turquoise
ATP6AP2	0.0936722	0.0236964	0.187252	0.0703333	0.0236416	0.0700262	0.0609473	-0.0609473	0.0850504	0.663746	0.000528955	0.19643	0.664477	0.198396	0.263117	0.263117	turquoise
ATP23	-0.0315396	0.0156106	0.0969814	-0.041109	-0.050501	0.0276098	-0.0859652	0.0859652	0.562789	0.774589	0.0745494	0.450597	0.353938	0.612457	0.114137	0.114137	grey
PLIN4	-0.086773	-0.116262	0.0778593	0.062631	0.00259726	-0.00742773	0.303842	-0.303842	0.110764	0.0323579	0.152597	0.250132	0.962	0.891619	1.13513e-08	1.13513e-08	brown
ARL17B	0.0488544	-0.0110356	0.0357993	0.0410552	0.13109	0.0338476	0.0629364	-0.0629364	0.369869	0.83957	0.511238	0.45119	0.0157295	0.534549	0.247825	0.247825	grey
PLP2	-0.0522288	0.0320682	0.00973498	-0.119741	0.00304434	0.023324	0.0174598	-0.0174598	0.337692	0.556258	0.858266	0.0274918	0.955465	0.668714	0.748736	0.748736	grey
TREH	0.156968	-0.0534452	-0.10598	-0.0447284	-0.0157511	-0.09253	-0.0676917	0.0676917	0.00376278	0.326545	0.0512251	0.411699	0.772615	0.08894	0.213809	0.213809	grey
NOP16	-0.112039	0.134819	-0.0226473	-0.00331249	0.0621442	0.0416653	-0.232679	0.232679	0.0392325	0.0129743	0.67778	0.951547	0.25384	0.444487	1.50605e-05	1.50605e-05	blue
GNA12	0.0789396	-0.0956958	0.116417	0.0461933	0.021959	0.0618776	0.254399	-0.254399	0.146967	0.0784964	0.0321268	0.396538	0.687049	0.255886	2.08529e-06	2.08529e-06	turquoise
HEY2	0.024862	0.0272097	0.0409941	-0.0879524	0.00517223	3.28871e-05	0.22473	-0.22473	0.648291	0.61762	0.451864	0.10598	0.92441	0.999519	2.96712e-05	2.96712e-05	red
ACOX2	-0.0180708	0.0170526	0.0217498	0.00960362	0.0412613	-0.00303846	0.0736898	-0.0736898	0.740254	0.754406	0.689875	0.860159	0.44892	0.955551	0.175863	0.175863	grey
INTS13	-0.120044	0.0485859	0.122383	0.0984073	-0.010574	0.112511	-0.137408	0.137408	0.0271	0.372509	0.0242296	0.070362	0.846195	0.0384077	0.0113213	0.0113213	grey
PROSER2	0.0481247	0.0529262	-0.0681308	0.00182413	-0.0155445	0.00417981	-0.0697575	0.0697575	0.37707	0.331271	0.210846	0.973306	0.775518	0.938882	0.200127	0.200127	grey
PPP1R7	-0.0584829	0.0556414	0.0324603	-0.00936661	-0.00186859	0.0315186	-0.100271	0.100271	0.282945	0.307029	0.551438	0.863576	0.972656	0.563049	0.0651811	0.0651811	grey
CYP2E1	0.0517917	-0.0644528	-0.0828704	-0.0883444	-0.0265619	-0.0650516	-0.0188852	0.0188852	0.341755	0.236591	0.127811	0.104427	0.626021	0.232256	0.728998	0.728998	grey
PES1	-0.0832351	0.0394156	0.0205129	-0.0374774	0.0227131	0.0534591	-0.126763	0.126763	0.126137	0.469484	0.706674	0.491625	0.676897	0.326419	0.0195559	0.0195559	blue
AP002990.1	0.0320156	0.119964	-0.063652	0.00663854	0.120232	-0.0335103	0.0216967	-0.0216967	0.556906	0.0272032	0.242479	0.903074	0.0268587	0.538631	0.690593	0.690593	grey
HSDL2	0.00553614	0.00217302	0.0427639	-0.0266574	0.00784011	-0.0740692	-0.249866	0.249866	0.91911	0.968203	0.432561	0.624779	0.885642	0.173643	3.19904e-06	3.19904e-06	blue
STARD5	-0.0442527	0.110519	-0.0959588	-0.032906	0.025957	-0.0787684	-0.10076	0.10076	0.416696	0.0419935	0.0776752	0.545984	0.633908	0.147849	0.0638743	0.0638743	grey
PTCD3	0.00485728	0.0767109	0.0558225	0.0114558	-0.0304383	0.0503114	-0.305735	0.305735	0.929001	0.158759	0.305456	0.83355	0.576511	0.355749	9.10766e-09	9.10766e-09	blue
TSPEAR	0.00493611	-0.0680283	-0.0199713	-0.076397	-0.0610114	-0.0145725	-0.061397	0.061397	0.927852	0.211535	0.714075	0.160475	0.262614	0.789214	0.259604	0.259604	greenyellow
CYP2D6	0.0849997	0.0162991	0.0215319	0.0899591	-0.0819925	0.0131743	-0.152108	0.152108	0.118274	0.764933	0.692823	0.098217	0.131912	0.809028	0.00500669	0.00500669	grey
FLYWCH2	-0.017575	-0.0577965	-0.0354478	-0.0417164	-0.0497235	-0.064011	0.115578	-0.115578	0.747135	0.288643	0.515398	0.443928	0.361405	0.239826	0.0333954	0.0333954	grey
NTM	-0.0113312	-0.0224817	0.129055	-0.00715091	0.0253497	0.0515312	0.541404	-0.541404	0.835334	0.680006	0.0174389	0.895635	0.641868	0.344192	3.28205e-27	3.28205e-27	yellow
ZNF551	-0.0356314	0.0718071	0.0424379	0.0744188	-0.0268255	0.0425652	-0.0701467	0.0701467	0.513222	0.187193	0.43608	0.171616	0.622597	0.434704	0.197623	0.197623	turquoise
RPL41	-0.0364106	-0.0369867	0.118429	0.0251446	-0.069054	0.0583761	-0.0192518	0.0192518	0.504047	0.497319	0.0292473	0.644566	0.204713	0.283827	0.723949	0.723949	darkgrey
ASB2	-0.0440619	-0.165456	0.117275	0.0265126	0.0234441	-0.0296755	0.354342	-0.354342	0.41871	0.00224163	0.0308699	0.626661	0.667111	0.586108	1.82601e-11	1.82601e-11	brown
CD1C	-0.011606	-0.17055	0.0300873	-0.00710472	-0.0264244	-0.0360615	0.235657	-0.235657	0.831399	0.00162335	0.580917	0.896305	0.627809	0.508147	1.16102e-05	1.16102e-05	green
MZT2A	-0.072126	0.0656126	-0.00734507	-0.0868369	0.0160136	-6.64489e-05	-0.0969525	0.0969525	0.185237	0.228245	0.892818	0.1105	0.768933	0.999027	0.0746363	0.0746363	grey
EXOSC7	-0.0488018	0.0707529	0.0662141	0.0121357	0.0190267	0.0614915	-0.230091	0.230091	0.370385	0.193767	0.223999	0.823828	0.727047	0.25887	1.8831e-05	1.8831e-05	blue
OGDHL	0.00138985	-0.0231672	0.0251235	0.0526564	-0.00626876	0.0830443	-0.0562389	0.0562389	0.97966	0.670811	0.644843	0.333745	0.908449	0.127011	0.301856	0.301856	grey
IL12A	0.0246812	0.029528	0.0100703	0.0657549	-0.0223424	-0.0127357	-0.0227018	0.0227018	0.650679	0.587971	0.853439	0.227235	0.68188	0.815271	0.677048	0.677048	grey
FGFBP1	-0.00747706	0.0461588	-0.114283	-0.0778598	-0.0153466	-0.0597835	-0.0710252	0.0710252	0.890904	0.396892	0.0354404	0.152594	0.778302	0.272359	0.192053	0.192053	pink
FAM86C1	-0.0617289	0.159613	0.0539845	0.00444244	0.0250439	0.0373979	-0.105926	0.105926	0.257032	0.00321027	0.32168	0.93505	0.645892	0.492546	0.0513448	0.0513448	blue
MATN3	0.0140872	-0.104066	0.00935074	0.0261683	-0.015991	0.00874173	0.292848	-0.292848	0.796076	0.0555964	0.863805	0.631147	0.769249	0.872597	3.95464e-08	3.95464e-08	grey
PIGA	0.0236983	0.0888615	0.0878942	0.0364662	0.0122809	0.101205	-0.194522	0.194522	0.663721	0.102405	0.106212	0.503395	0.821755	0.0627055	0.000314847	0.000314847	turquoise
MNT	0.0113255	0.0199002	0.0980914	0.0707387	-0.0296735	0.0802376	0.0789071	-0.0789071	0.835416	0.715049	0.0712729	0.193857	0.586133	0.140414	0.147134	0.147134	turquoise
MSANTD3	0.0243383	0.0105415	0.0863784	-0.0573533	0.0387486	-0.0103937	0.242742	-0.242742	0.655217	0.846662	0.112402	0.292363	0.477042	0.848786	6.16537e-06	6.16537e-06	grey
PLOD1	-0.02533	0.0587658	0.00241664	0.0360607	0.0590138	0.0560498	0.0811701	-0.0811701	0.642127	0.28062	0.964641	0.508157	0.27859	0.303487	0.135845	0.135845	blue
CD79B	-0.0782415	-0.0272504	0.000913335	-0.0078687	-0.0108686	0.0303309	-0.00195355	0.00195355	0.150587	0.617095	0.986633	0.885228	0.841967	0.577858	0.971413	0.971413	red
FARS2	-0.00352248	-0.0433685	0.0513639	0.0209025	0.0226568	0.030006	-0.0364832	0.0364832	0.948479	0.426076	0.345763	0.701367	0.677652	0.58194	0.503196	0.503196	blue
DDX60L	-0.0163369	0.0340728	0.108804	0.103584	-0.0377527	0.128604	-0.101185	0.101185	0.764404	0.531833	0.0453017	0.0567458	0.488448	0.0178388	0.0627559	0.0627559	turquoise
VNN2	-0.0527352	-0.00268305	-0.0164394	0.130378	-0.0397464	-0.00416204	-0.105027	0.105027	0.333022	0.960746	0.762969	0.01631	0.46576	0.939142	0.0533641	0.0533641	grey
SH3D21	0.0621949	0.119948	0.0216818	0.0548451	0.0974354	0.0837519	-0.101021	0.101021	0.253452	0.0272234	0.690794	0.314015	0.0731946	0.123793	0.0631851	0.0631851	grey
RCN3	0.019898	0.0313853	-0.0453459	-0.0457222	0.0106005	-0.031268	0.401512	-0.401512	0.715078	0.564702	0.405267	0.401377	0.845816	0.566158	1.45569e-14	1.45569e-14	yellow
PPP4C	0.0135071	0.0582614	-0.0774789	-0.062477	0.0577589	-0.0520301	-0.0714646	0.0714646	0.804302	0.284776	0.154618	0.251301	0.288957	0.339535	0.18931	0.18931	blue
ALDOA	-0.0260073	0.0905742	-0.0423197	-0.00694517	0.0657942	-0.000621246	-0.0615907	0.0615907	0.63325	0.0959304	0.437361	0.898621	0.226957	0.990907	0.258101	0.258101	grey
NCEH1	-0.0221939	0.0699429	0.0815373	-0.0350378	0.120718	0.0152042	-0.0984332	0.0984332	0.68388	0.198932	0.134078	0.52027	0.0262445	0.780305	0.0702878	0.0702878	turquoise
SMARCC2	0.0789535	0.0251864	0.129537	0.0391422	0.015571	0.142816	-0.0440892	0.0440892	0.146896	0.644016	0.0170199	0.472573	0.775146	0.00845555	0.418422	0.418422	turquoise
RCAN3	0.0373722	-0.0471699	-0.0359696	0.0122443	0.0368868	0.0546497	-0.0148411	0.0148411	0.492843	0.386619	0.50923	0.822277	0.498482	0.315744	0.785422	0.785422	turquoise
GALC	-0.0516152	0.021195	0.00569085	0.0686844	-0.0119727	0.00501709	-0.171226	0.171226	0.343405	0.697392	0.916857	0.207153	0.826156	0.926671	0.00155426	0.00155426	grey
ZBTB21	0.0046334	0.055227	0.116349	0.0162781	0.00305923	0.0225467	0.0576119	-0.0576119	0.932265	0.310652	0.0322275	0.765227	0.955247	0.679131	0.290189	0.290189	turquoise
KBTBD8	-0.0995525	0.00174206	0.0950346	0.0811318	0.00904772	0.0355051	-0.117162	0.117162	0.0671399	0.974507	0.0805911	0.136031	0.868177	0.514717	0.0310327	0.0310327	green
ZNF451	0.0192754	0.0614086	0.128968	0.0494074	-0.0257113	0.0585149	-0.174436	0.174436	0.723624	0.259514	0.0175152	0.36447	0.637124	0.282682	0.00126147	0.00126147	turquoise
MED31	-0.165113	0.0621369	0.110434	0.0253162	-0.0275298	0.075448	-0.0104528	0.0104528	0.00229007	0.253895	0.0421513	0.642309	0.613488	0.16575	0.847937	0.847937	blue
RNF24	0.0796009	-0.088338	0.06904	-0.0246849	-0.0496569	0.0448583	0.250853	-0.250853	0.1436	0.104452	0.204805	0.650629	0.36205	0.410342	2.91638e-06	2.91638e-06	yellow
BCL7C	-0.0805298	-0.0304297	-0.0386357	-0.081804	0.0445346	-0.0809467	0.211194	-0.211194	0.13897	0.576619	0.478327	0.132806	0.413731	0.136929	8.91352e-05	8.91352e-05	grey
DROSHA	0.0133545	0.0814674	0.0410934	0.0290483	0.020356	0.086632	-0.167265	0.167265	0.806468	0.134414	0.450769	0.594052	0.708815	0.111347	0.0020009	0.0020009	turquoise
LEMD2	0.0428288	0.112338	-0.0204467	0.0196576	0.0446862	0.0514325	-0.0565295	0.0565295	0.431862	0.0387083	0.707577	0.718375	0.412142	0.345119	0.299361	0.299361	darkgreen
BTLA	-0.027956	-0.0979607	0.0809199	0.0512342	0.056489	0.0392808	0.120647	-0.120647	0.608004	0.0716525	0.13706	0.346984	0.299708	0.471006	0.0263337	0.0263337	green
PRDM10	0.00716543	0.0909671	0.0863178	0.0598324	-0.029338	0.0943874	-0.213642	0.213642	0.895424	0.0944919	0.112655	0.271966	0.590377	0.0826854	7.3427e-05	7.3427e-05	turquoise
UQCRB	-0.0169088	0.0240532	-0.0265973	0.00621474	-0.054768	-0.00794442	-0.122813	0.122813	0.756412	0.659	0.62556	0.909235	0.314696	0.884131	0.0237323	0.0237323	grey
DIPK1B	-0.0740261	-0.0315759	-0.049452	-0.0264798	0.0570288	-0.0158162	0.0545793	-0.0545793	0.173894	0.562339	0.364036	0.627088	0.295106	0.771702	0.316369	0.316369	grey
RNF5	-0.0449453	0.00676666	-0.16925	-0.055531	-0.0473031	-0.108795	-0.089205	0.089205	0.409434	0.901213	0.00176423	0.307992	0.385279	0.0453188	0.10108	0.10108	darkgreen
CDK8	-0.00500408	-0.0122988	0.108699	0.0393659	0.0389532	0.0222909	-0.10503	0.10503	0.926861	0.821499	0.0455118	0.470045	0.474717	0.682574	0.0533576	0.0533576	turquoise
PCBP3	-0.0471503	-0.100867	0.0326492	0.0162034	0.0231519	-0.0543755	0.350836	-0.350836	0.386817	0.0635918	0.549122	0.766272	0.671016	0.318182	2.96649e-11	2.96649e-11	brown
TAF9B	0.00674982	-0.105757	0.0924224	0.0373908	0.00815694	0.0417505	0.143084	-0.143084	0.901458	0.0517204	0.0893137	0.492628	0.881054	0.443555	0.00833196	0.00833196	brown
PLK3	0.0121848	0.0539661	0.0445585	0.0400798	-0.0162506	0.054777	0.130615	-0.130615	0.823127	0.321845	0.41348	0.462025	0.765612	0.314617	0.0161144	0.0161144	grey
MPLKIP	-0.000745361	0.0180069	0.0500221	-0.0526941	-0.0208925	0.00250877	-0.116813	0.116813	0.989091	0.74114	0.358526	0.333399	0.701503	0.963294	0.0315405	0.0315405	blue
RIC8B	0.00528568	0.00173051	0.135343	0.0101264	0.0756167	0.0331525	0.0118182	-0.0118182	0.922757	0.974676	0.0126239	0.85263	0.164803	0.542979	0.828364	0.828364	turquoise
WNK4	0.13662	0.130403	-0.0769977	0.0299962	0.113461	-0.0222643	-0.0896766	0.0896766	0.0118037	0.0162891	0.157203	0.582063	0.0367913	0.682932	0.099282	0.099282	grey
LNPEP	0.010241	-0.0828884	0.217785	0.10878	-0.00741764	0.0983445	0.168762	-0.168762	0.850982	0.127728	5.26172e-05	0.0453491	0.891765	0.0705423	0.00181983	0.00181983	brown
MRPL22	-0.13386	0.0162135	0.0518928	0.0406562	-0.012378	0.0715422	-0.143524	0.143524	0.0136391	0.766131	0.340813	0.455605	0.820369	0.188829	0.00813257	0.00813257	blue
DOCK10	-0.027848	-0.0279634	0.207219	0.102817	0.0812734	0.113551	0.21538	-0.21538	0.609393	0.60791	0.000121538	0.0586125	0.135346	0.0366411	6.38985e-05	6.38985e-05	green
DHDDS	0.017989	0.0805497	-0.00202919	0.0670842	-0.0286789	0.0603031	-0.120509	0.120509	0.741388	0.138872	0.970307	0.217958	0.598755	0.268206	0.0265072	0.0265072	turquoise
MGA	0.00572814	0.0486385	0.0735967	0.0837426	0.0171374	0.104791	-0.0328434	0.0328434	0.916314	0.371991	0.176411	0.123835	0.753224	0.0539051	0.546749	0.546749	turquoise
RMI2	-0.0312028	0.0396599	0.0513662	-0.0389868	0.105475	0.040871	-0.231208	0.231208	0.566969	0.466733	0.345741	0.474335	0.052351	0.453225	1.71062e-05	1.71062e-05	blue
GALNT16	0.00291764	-0.176444	0.107955	0.0610744	0.0632579	0.0444552	0.332005	-0.332005	0.957317	0.00110507	0.0470184	0.26212	0.245413	0.414565	3.63418e-10	3.63418e-10	brown
ARFGEF1	0.0615663	0.0931055	0.0705328	0.0628941	-0.0161695	0.0736183	-0.280494	0.280494	0.258291	0.0869627	0.19516	0.248144	0.766748	0.176284	1.51156e-07	1.51156e-07	turquoise
VPS45	0.015327	-0.0228295	-0.0230952	0.00369569	0.0430083	-0.0701446	0.0208694	-0.0208694	0.778577	0.675334	0.671775	0.94595	0.429932	0.197636	0.701816	0.701816	turquoise
NLGN3	6.11128e-05	-0.152211	0.136949	0.0393975	0.0502479	0.0630872	0.350582	-0.350582	0.999106	0.0049768	0.0115999	0.469688	0.356357	0.246691	3.07228e-11	3.07228e-11	yellow
ITGB6	0.00133714	0.0288718	0.0848818	0.0531591	0.0258088	0.0729262	0.0807622	-0.0807622	0.980431	0.596297	0.118787	0.329145	0.635846	0.180395	0.13783	0.13783	grey
USP18	-0.0328247	0.0704792	0.0388991	-0.0344114	0.0180673	0.0112455	0.0699906	-0.0699906	0.546976	0.195501	0.475331	0.527761	0.740302	0.836562	0.198625	0.198625	grey
LPCAT3	0.00249658	-0.0248631	-0.0831061	-0.0261131	-0.0471277	-0.0601876	-0.16022	0.16022	0.963472	0.648277	0.126727	0.631869	0.387045	0.269125	0.00309437	0.00309437	grey
SOSTDC1	0.0145954	-0.029497	-0.0662568	0.0698106	-0.0546731	0.0103237	-0.14403	0.14403	0.788891	0.588364	0.2237	0.199784	0.315537	0.849793	0.00790885	0.00790885	grey
ZNF850	-0.0692106	0.0541029	0.0947812	0.0145801	-0.0407643	0.0455528	-0.0217852	0.0217852	0.203686	0.320618	0.0814059	0.789107	0.454406	0.403126	0.689396	0.689396	turquoise
CAND1	0.0600977	0.024181	0.12384	0.105056	-0.0249181	0.146533	-0.0546294	0.0546294	0.269842	0.657303	0.0225783	0.0532987	0.647551	0.00688019	0.315925	0.315925	white
KCNJ5	0.0506789	-0.1589	0.121616	0.0206238	0.0451954	0.0165561	0.170841	-0.170841	0.352242	0.00335157	0.0251402	0.705161	0.40683	0.761337	0.00159327	0.00159327	magenta
KCNJ11	-0.0796604	0.0330953	-0.00875277	-0.070918	-0.0578198	0.0152006	-0.104233	0.104233	0.1433	0.543676	0.872437	0.192726	0.288449	0.780356	0.0552032	0.0552032	cyan
CRYBB1	0.00349889	-0.131814	0.116167	0.0728686	0.0383912	-0.0118502	0.402102	-0.402102	0.948824	0.0151579	0.0324999	0.180741	0.481118	0.827907	1.32165e-14	1.32165e-14	magenta
MEP1A	0.070114	0.0815181	0.0154908	-0.0174048	-0.0285309	0.0419614	-0.132347	0.132347	0.197832	0.13417	0.776273	0.749502	0.600644	0.441254	0.014748	0.014748	grey
TRAF3IP2	0.0384885	0.0403377	0.0458859	0.0124766	0.0117046	0.0161602	-0.136762	0.136762	0.480006	0.459146	0.399691	0.818963	0.829989	0.766878	0.0117153	0.0117153	grey
POGK	-3.38535e-05	0.0190395	0.0930542	0.0368851	0.0579039	0.0725838	-0.0803637	0.0803637	0.999505	0.726871	0.0871374	0.498502	0.287747	0.182456	0.139789	0.139789	turquoise
SMARCC1	-0.00279558	0.0187897	0.0867156	0.0444509	0.000603306	0.0640478	-0.168955	0.168955	0.959101	0.730314	0.111001	0.41461	0.99117	0.239556	0.00179769	0.00179769	turquoise
PRKACB	-0.0673254	-0.122297	0.142112	0.114364	0.0077346	0.0142457	0.233651	-0.233651	0.216303	0.0243306	0.00878774	0.0353086	0.887171	0.793834	1.384e-05	1.384e-05	brown
HOOK3	0.030613	-0.141769	0.176257	0.0511498	0.0201575	0.0711457	0.340295	-0.340295	0.574324	0.00895377	0.00111885	0.34778	0.711527	0.191298	1.23136e-10	1.23136e-10	brown
DHX15	-0.0569191	0.146888	0.0708143	0.0406506	-0.0157197	0.0750178	-0.255212	0.255212	0.296038	0.00674437	0.193379	0.455667	0.773057	0.168183	1.92958e-06	1.92958e-06	turquoise
ATAD3C	0.0703391	-0.0619871	-0.000241189	-0.0417629	-0.00932521	0.0329541	0.00593183	-0.00593183	0.196393	0.255044	0.99647	0.44342	0.864173	0.545397	0.91335	0.91335	black
RAD54L	-0.0520568	0.097168	-0.00355453	-0.0263217	0.00997853	0.0435868	-0.267883	0.267883	0.339287	0.07399	0.948011	0.629148	0.854759	0.423749	5.56278e-07	5.56278e-07	blue
CHORDC1	-0.124167	0.0623306	0.119208	0.00139585	-0.0984359	0.0877268	-0.228285	0.228285	0.022221	0.252416	0.0281938	0.979572	0.0702802	0.106882	2.1975e-05	2.1975e-05	blue
SLC18A2	-0.065931	0.0292989	-0.0641721	0.0414422	-0.021827	-0.0119659	-0.0180361	0.0180361	0.22599	0.590872	0.238643	0.446931	0.688831	0.826253	0.740735	0.740735	midnightblue
DENND5A	-0.0252441	-0.103144	0.153886	0.0915766	0.0614374	0.00162375	0.458867	-0.458867	0.643257	0.0578105	0.00451403	0.0922948	0.25929	0.976238	4.67573e-19	4.67573e-19	brown
ATP6V0E1	-0.0617182	-0.0349876	0.0640974	-0.0135428	0.0676672	0.0148195	0.268114	-0.268114	0.257115	0.520868	0.239192	0.803795	0.213975	0.785728	5.43457e-07	5.43457e-07	grey
BTBD16	-0.0534145	0.00908859	0.0211343	0.0666232	-0.00656059	0.0845948	0.0391139	-0.0391139	0.326823	0.867587	0.698216	0.221144	0.904207	0.120044	0.472894	0.472894	cyan
N4BP1	0.0661728	0.0645481	0.0516824	0.0406974	0.0746717	0.0540059	0.0335354	-0.0335354	0.224289	0.235898	0.342776	0.455148	0.17016	0.321488	0.538327	0.538327	turquoise
ART5	-0.0818319	0.0387311	0.00179092	-0.0614497	0.0373699	-0.0100656	0.00866208	-0.00866208	0.132673	0.477241	0.973792	0.259195	0.492871	0.853506	0.873748	0.873748	grey
TBX19	0.0253253	0.040515	0.112051	0.0395174	0.0427489	0.0347478	0.0194092	-0.0194092	0.642189	0.457173	0.0392119	0.468337	0.432722	0.523731	0.721784	0.721784	turquoise
CXCR1	0.0720165	0.0478906	-0.0852579	-0.00373507	-0.0415984	-0.0538038	0.0331582	-0.0331582	0.185907	0.379398	0.117157	0.945375	0.445219	0.323304	0.54291	0.54291	darkorange
ISLR2	0.0239329	-0.144198	0.165261	0.0491274	0.0345119	0.0792763	0.432791	-0.432791	0.660598	0.00783546	0.00226898	0.367198	0.526556	0.145245	6.58645e-17	6.58645e-17	yellow
PDRG1	0.0499439	0.038187	-0.00316367	-0.0329854	-0.02415	0.0349922	-0.111378	0.111378	0.359279	0.483455	0.953721	0.545015	0.657714	0.520814	0.0404143	0.0404143	blue
AKR1C2	-0.0309972	-0.0635217	-0.0222568	-0.0382305	-0.0454771	0.00779845	0.0669933	-0.0669933	0.569527	0.243446	0.683032	0.482957	0.403909	0.886246	0.218583	0.218583	grey
EIF3I	-0.0971551	0.0692387	0.0167191	0.00555296	-0.0185354	-0.00137187	-0.145293	0.145293	0.0740287	0.203502	0.75906	0.918865	0.733826	0.979923	0.00737352	0.00737352	blue
TTLL4	0.0499714	0.0735744	-0.0210984	-0.00548193	0.00263984	0.0208681	-0.229015	0.229015	0.359013	0.176543	0.698704	0.919899	0.961377	0.701835	2.06491e-05	2.06491e-05	blue
HMGB2	-0.0794573	0.0849158	0.0834127	0.050482	-0.00607959	0.084623	-0.249533	0.249533	0.144326	0.118639	0.125328	0.354118	0.9112	0.11992	3.3e-06	3.3e-06	blue
UBE2N	-0.122565	-0.0170243	0.106827	-0.0217592	-0.0271617	0.0740583	-0.0824918	0.0824918	0.0240183	0.754801	0.0493849	0.689749	0.618241	0.173707	0.129568	0.129568	blue
FAM185A	0.0366707	0.0114766	0.0345692	0.0219869	-0.0071209	-0.00284789	-0.148511	0.148511	0.501003	0.833252	0.525869	0.686672	0.89607	0.958336	0.00615361	0.00615361	grey
PDE1C	0.00641918	-0.147389	0.0807542	0.100215	0.0402034	-0.0350427	0.195513	-0.195513	0.906262	0.00655689	0.137869	0.0653313	0.460644	0.520212	0.000292904	0.000292904	brown
ABCA1	-0.0155901	-0.0928505	0.165924	0.128841	0.0505212	0.0577827	0.320628	-0.320628	0.774877	0.0878343	0.00217696	0.0176274	0.353745	0.288759	1.52377e-09	1.52377e-09	yellow
NIF3L1	-0.111836	0.0921387	0.0684821	0.0264044	-0.0273336	0.0664686	-0.236166	0.236166	0.039593	0.0903048	0.208497	0.62807	0.616019	0.22222	1.11012e-05	1.11012e-05	blue
MCOLN2	-0.0533661	0.0611208	0.0919098	0.0925727	-0.0228479	0.0719124	-0.0823612	0.0823612	0.327262	0.261758	0.0911109	0.0887921	0.675088	0.186545	0.130178	0.130178	green
MMUT	0.0246681	0.075466	0.044644	0.0329355	-0.0363335	-0.0250214	-0.253239	0.253239	0.650852	0.165648	0.412583	0.545623	0.504951	0.646189	2.32841e-06	2.32841e-06	turquoise
VTA1	-0.0217568	0.0331233	0.0832829	0.00379393	-0.0063855	0.0714573	-0.209139	0.209139	0.68978	0.543334	0.125918	0.944515	0.906752	0.189356	0.000104709	0.000104709	black
SIM2	0.070812	-0.0264149	-0.0479224	-0.0764298	0.0406561	-0.017657	-0.248972	0.248972	0.193394	0.627933	0.379081	0.160295	0.455606	0.745995	3.47727e-06	3.47727e-06	grey
ZCCHC17	-0.026309	0.0704402	-0.0202801	-0.0316029	-0.0608066	-0.0836734	-0.0259379	0.0259379	0.629313	0.195749	0.709852	0.562004	0.264223	0.124147	0.634158	0.634158	blue
EML2	-0.077989	0.0815012	-0.0219293	-0.00178738	-0.0135195	0.0434052	-0.183949	0.183949	0.151912	0.134251	0.68745	0.973844	0.804125	0.425684	0.000665457	0.000665457	turquoise
GPR35	-0.0162644	0.119965	0.0234328	0.023165	0.0575009	0.036198	-0.245251	0.245251	0.765419	0.0272018	0.667262	0.670841	0.291121	0.506542	4.90456e-06	4.90456e-06	grey
PRG4	-0.0524871	-0.0674832	0.0621785	0.0399362	-0.0158444	-0.00310654	0.263756	-0.263756	0.335304	0.215227	0.253577	0.463632	0.771306	0.954556	8.40075e-07	8.40075e-07	brown
PCDHGA2	0.0197425	-0.133995	0.0947207	0.0648784	0.0502227	0.00966847	0.386264	-0.386264	0.71721	0.0135436	0.0816015	0.233504	0.356599	0.859224	1.65887e-13	1.65887e-13	brown
KATNB1	0.0593449	0.0784337	-0.0459171	-0.0325344	0.0522467	-0.00067932	-0.119892	0.119892	0.275898	0.149583	0.399371	0.55053	0.337526	0.990057	0.0272964	0.0272964	blue
S100A12	0.0166492	0.0217288	-0.0365709	-0.0256669	-0.0494906	-0.0565108	-0.00669482	0.00669482	0.760036	0.690159	0.50217	0.637705	0.363662	0.299522	0.902257	0.902257	pink
ZNF248	0.0533662	0.00767136	0.112967	-0.00851879	-0.0108896	0.00549416	0.0724913	-0.0724913	0.327262	0.888087	0.0376255	0.875819	0.841665	0.919721	0.183015	0.183015	turquoise
CREM	-0.0382435	0.00497601	0.136708	0.0403424	0.00433513	-0.0848426	0.272539	-0.272539	0.482808	0.92727	0.0117486	0.459094	0.936616	0.118958	3.46481e-07	3.46481e-07	yellow
ZDHHC6	0.010251	0.114945	0.0129387	-0.0423753	0.0420852	0.023553	-0.185095	0.185095	0.850839	0.034382	0.81238	0.436758	0.439907	0.665658	0.000614757	0.000614757	turquoise
AL159163.1	-0.0110095	0.129882	-0.0543054	-0.0329061	0.010015	-0.093727	-0.209793	0.209793	0.839945	0.0167256	0.318808	0.545982	0.854234	0.0848672	9.94927e-05	9.94927e-05	grey
POU6F1	-0.0110674	-0.150513	0.119786	0.0633489	0.0497032	0.0336409	0.478427	-0.478427	0.839115	0.0054891	0.027433	0.244733	0.361602	0.537049	8.56278e-21	8.56278e-21	brown
CSPG4	0.0125638	-0.081946	0.0434778	-0.0220215	0.0108087	-0.0401837	0.311072	-0.311072	0.81772	0.132132	0.42491	0.686205	0.842826	0.460863	4.85361e-09	4.85361e-09	brown
BIN3	0.0737868	0.0453468	-0.120129	-0.111488	-0.057005	-0.109598	-0.0904695	0.0904695	0.175293	0.405258	0.0269907	0.0402157	0.295308	0.043744	0.0963167	0.0963167	blue
B3GNT4	-0.117233	-0.0150459	0.0347287	-0.0725232	-0.0122103	0.0461265	-0.079657	0.079657	0.0309308	0.782535	0.52396	0.182822	0.822762	0.397223	0.143317	0.143317	grey
RTN2	-0.114437	0.0339826	0.0288656	-0.0154322	0.0234594	0.0308964	0.174804	-0.174804	0.035191	0.53292	0.596376	0.777097	0.666907	0.570784	0.0012314	0.0012314	grey
TMED6	0.0507159	-0.11022	-0.0118326	-0.0280416	0.0117188	-0.00042169	-0.134277	0.134277	0.35189	0.0425539	0.828159	0.606907	0.829786	0.993828	0.0133468	0.0133468	grey
XYLT2	0.103198	-0.102397	-0.0489211	0.050768	-0.0215486	0.0536253	0.0145827	-0.0145827	0.057678	0.0596575	0.369216	0.351395	0.692597	0.324915	0.78907	0.78907	turquoise
LYZ	0.0480158	-0.0609387	0.0355881	-0.0181764	-0.0309813	0.00817638	-0.0857337	0.0857337	0.378152	0.263185	0.513735	0.738791	0.569725	0.880773	0.115119	0.115119	grey
DDX21	-0.0370899	0.0669077	0.16631	0.0540166	-0.0169401	0.135652	-0.232669	0.232669	0.496119	0.219174	0.00212491	0.321392	0.755975	0.0124208	1.50736e-05	1.50736e-05	blue
VAC14	0.0449697	0.0614284	0.0813132	0.00800738	0.100089	0.0914131	-0.0721853	0.0721853	0.409179	0.25936	0.135155	0.883219	0.0656713	0.0928801	0.184875	0.184875	blue
USP9X	-0.150661	0.0714489	0.0946113	0.0508223	0.0140267	0.122892	-0.110131	0.110131	0.00544258	0.189408	0.081956	0.350879	0.796933	0.0236411	0.042724	0.042724	turquoise
STX17	0.0486305	-0.0108118	0.100338	0.0491905	0.0162063	0.0596031	-0.0686746	0.0686746	0.37207	0.842782	0.0650002	0.366582	0.766232	0.27381	0.207218	0.207218	turquoise
SAP30	-0.0924045	-0.0214448	0.0879397	0.0780176	0.0010152	0.0446022	-0.0689108	0.0689108	0.0893757	0.694004	0.106031	0.151762	0.985142	0.413022	0.205656	0.205656	grey
ISG20L2	-0.0481589	-0.0161562	0.0458121	0.016844	0.0497318	0.0365184	-0.190412	0.190412	0.37673	0.766934	0.400451	0.757316	0.361326	0.502784	0.000423148	0.000423148	turquoise
ZFYVE19	0.0687763	0.0703322	7.791e-05	-0.0297466	0.0322711	0.0105723	-0.150207	0.150207	0.206544	0.196437	0.99886	0.585209	0.553761	0.84622	0.00558636	0.00558636	blue
STOX1	-0.0202764	0.00935409	0.0709145	0.00834632	-0.0158655	0.0810739	-0.173335	0.173335	0.709902	0.863756	0.192748	0.878314	0.77101	0.136311	0.0013556	0.0013556	grey
NR2F1	-0.0201223	-0.110408	0.1656	0.0875947	-0.033598	0.0579029	0.489109	-0.489109	0.712009	0.0422017	0.00222152	0.107413	0.537568	0.287755	8.62655e-22	8.62655e-22	brown
ZNF566	-0.0196151	-0.049816	0.139002	0.0564732	0.0337398	0.0467917	0.0979354	-0.0979354	0.718957	0.360512	0.0103982	0.299844	0.535852	0.390442	0.0717259	0.0717259	turquoise
MORF4L2	0.000421577	0.0656473	0.0481048	-0.0204938	-0.0172454	0.0284388	-0.110348	0.110348	0.99383	0.227998	0.377267	0.706935	0.75172	0.60182	0.042314	0.042314	blue
PTGS2	0.0287107	0.0585583	0.0760255	0.053834	0.0583937	-0.00215632	0.0358519	-0.0358519	0.598349	0.282324	0.162525	0.323032	0.283681	0.968448	0.510618	0.510618	grey
ZZEF1	0.070631	0.108282	0.0608984	0.0385354	0.0148931	0.0597922	-0.103011	0.103011	0.194538	0.046351	0.263501	0.47947	0.784689	0.272288	0.0581369	0.0581369	turquoise
CCDC90B	-0.0768586	0.00275773	0.0616557	0.0361066	-0.0379869	0.0558969	0.0852681	-0.0852681	0.157956	0.959654	0.257598	0.507616	0.485752	0.304811	0.117112	0.117112	turquoise
SYNJ1	0.0735043	0.0532901	0.194533	0.0428981	0.0540336	0.108104	-0.0204783	0.0204783	0.176956	0.327952	0.000314587	0.431116	0.32124	0.0467147	0.707145	0.707145	turquoise
UBE2Z	0.0505609	0.0782385	0.0648113	0.0218416	0.0457542	0.0997649	0.00753082	-0.00753082	0.353366	0.150602	0.233989	0.688635	0.401047	0.0665558	0.890124	0.890124	turquoise
CDK5RAP2	0.0305726	-0.0205189	0.0752102	0.0140989	0.0158609	0.0597722	-0.00878612	0.00878612	0.574829	0.706591	0.167092	0.795911	0.771074	0.272449	0.871955	0.871955	turquoise
ZNF132	-0.00442118	-0.145404	0.0652811	0.0274431	0.0623011	0.0700113	0.142754	-0.142754	0.935361	0.00732815	0.230609	0.614607	0.252641	0.198491	0.00848415	0.00848415	brown
FOCAD	0.0221157	0.0161662	0.0846821	0.040671	-0.0177457	0.0251424	-0.0647456	0.0647456	0.684934	0.766794	0.11966	0.45544	0.744764	0.644595	0.234464	0.234464	turquoise
ICA1	0.137355	0.102061	-0.0094064	-0.0243042	0.00644462	-0.0453152	-0.215369	0.215369	0.0113531	0.0605025	0.863002	0.655669	0.905893	0.405586	6.39553e-05	6.39553e-05	grey
OSBPL5	-0.0131728	-0.0543619	0.177149	0.0570584	0.042253	0.129815	0.295133	-0.295133	0.80905	0.318304	0.00105454	0.294855	0.438084	0.0167823	3.06388e-08	3.06388e-08	brown
C11orf53	0.0468812	-0.0257089	0.000186071	0.053703	-0.0262243	0.0160815	-0.0361261	0.0361261	0.389536	0.637155	0.997277	0.324214	0.630418	0.767981	0.507388	0.507388	grey
FGFR4	0.131845	0.0335862	-0.0416863	0.0331769	0.0622802	0.035865	-0.128206	0.128206	0.0151336	0.537711	0.444258	0.542681	0.2528	0.510462	0.0181982	0.0181982	grey
WDR36	-0.017802	0.0870514	0.188058	0.119292	0.00478611	0.14919	-0.142139	0.142139	0.743982	0.10962	0.000499846	0.0280827	0.930038	0.00592058	0.00877478	0.00877478	turquoise
TRIM25	0.0186304	0.0820071	-0.0164664	0.0757729	0.0322567	0.0593355	-0.227676	0.227676	0.732513	0.131843	0.762592	0.16393	0.553938	0.275975	2.31425e-05	2.31425e-05	turquoise
MBOAT1	-0.0333477	0.0672075	0.15127	0.0271038	0.0185078	0.0713178	-0.194858	0.194858	0.540604	0.217111	0.0052551	0.61899	0.734206	0.190224	0.000307237	0.000307237	turquoise
CRB3	-0.0344759	0.144124	-0.0773036	-0.110326	-0.0511493	-0.0410678	-0.198307	0.198307	0.526987	0.00786789	0.155556	0.0423544	0.347785	0.451052	0.000238517	0.000238517	grey
XPO4	0.0160821	0.0678707	0.169193	0.0694533	0.0243177	0.131624	-0.226537	0.226537	0.767973	0.212598	0.00177054	0.202101	0.65549	0.0153058	2.54873e-05	2.54873e-05	turquoise
TMEM30A	0.0440256	0.0589643	0.200841	0.112187	-0.00178188	0.0947531	0.00311879	-0.00311879	0.419094	0.278995	0.000197486	0.0389733	0.973924	0.0814967	0.954377	0.954377	turquoise
ECHDC3	-0.0392125	-0.0126945	-0.0791449	-0.0193733	0.119148	-0.0323111	-0.0753707	0.0753707	0.471778	0.815857	0.145915	0.722278	0.0282739	0.553269	0.166185	0.166185	grey
WAS	-0.0682667	-0.0157132	0.0543595	0.00777729	-0.0161983	0.0371757	0.0740192	-0.0740192	0.209935	0.773148	0.318325	0.886552	0.766345	0.495122	0.173935	0.173935	red
FBXO6	-0.104473	0.0568322	0.0693445	-0.0889661	-0.0423171	-0.0082859	-0.0135359	0.0135359	0.0546422	0.296777	0.20281	0.102	0.437388	0.879188	0.803892	0.803892	grey
ZGRF1	0.0219996	0.0666172	0.0604633	0.041428	-0.00747793	0.0833501	-0.287124	0.287124	0.686501	0.221185	0.266934	0.447088	0.890891	0.125612	7.4194e-08	7.4194e-08	blue
C8orf76	-0.010369	0.0852261	0.0171904	0.0696291	-0.0154798	0.107025	-0.125267	0.125267	0.849142	0.117294	0.752486	0.200959	0.776428	0.0489615	0.0210558	0.0210558	blue
DDR1	0.0583209	0.0647771	-0.0467324	-0.0278156	0.0153006	0.0150714	-0.154756	0.154756	0.284283	0.234237	0.391044	0.609808	0.778949	0.782176	0.00428934	0.00428934	grey
CDH6	0.0366302	-0.0254035	0.125971	0.0480013	-0.0168615	-0.00727036	0.21493	-0.21493	0.501476	0.641162	0.0203375	0.378295	0.757072	0.893902	6.62462e-05	6.62462e-05	yellow
SPI1	-0.0226934	-0.0118113	0.0793406	-0.00516605	-0.0385559	0.0104012	0.239186	-0.239186	0.677161	0.828463	0.144918	0.9245	0.479237	0.84868	8.49101e-06	8.49101e-06	green
PGBD4	0.107384	-0.10449	0.00178629	0.0227501	0.10195	-0.00584952	-0.00539827	0.00539827	0.0482053	0.0546031	0.97386	0.676399	0.0607842	0.914548	0.921117	0.921117	turquoise
ZNF780A	0.0544276	0.0312043	0.0585857	0.0911458	0.0160389	0.121417	-0.0796806	0.0796806	0.317718	0.56695	0.282098	0.0938434	0.768578	0.0253811	0.143198	0.143198	turquoise
PPARA	-0.0613984	0.0677003	0.0411396	0.023988	0.0573082	0.0207018	-0.165602	0.165602	0.259593	0.213751	0.45026	0.659866	0.292743	0.704099	0.00222114	0.00222114	turquoise
ZNF425	0.0735933	-0.125577	0.055729	-0.00642456	0.0304882	0.0041805	0.147635	-0.147635	0.176431	0.0207372	0.306268	0.906184	0.575886	0.938872	0.00646647	0.00646647	grey
ZNF778	0.0743792	0.0326756	0.0891504	0.0592703	0.0708107	-0.00445192	0.0168184	-0.0168184	0.171844	0.5488	0.101289	0.276503	0.193402	0.934912	0.757673	0.757673	turquoise
SCPEP1	0.0412136	0.022443	0.0184787	0.00313602	-0.00939978	-0.0701352	0.0989796	-0.0989796	0.449445	0.680526	0.734609	0.954125	0.863097	0.197696	0.0687364	0.0687364	grey
SGCB	-0.0494769	-0.0429353	0.185291	0.033531	-0.0051193	-0.0345377	0.267475	-0.267475	0.363795	0.430717	0.000606463	0.538381	0.925182	0.526246	5.79595e-07	5.79595e-07	brown
GC	0.0131739	-0.0168516	-0.0791715	0.0273897	0.03398	-0.019944	-0.0268254	0.0268254	0.809035	0.757209	0.145779	0.615295	0.532951	0.714448	0.622598	0.622598	midnightblue
FBXO28	0.0136726	0.0353509	0.117589	0.0514184	0.023862	0.0788324	-0.145584	0.145584	0.801952	0.516547	0.0304209	0.345251	0.661541	0.147518	0.00725494	0.00725494	turquoise
PDIA3	0.0267523	0.120842	0.0709488	0.130301	-0.0160885	0.0570735	-0.26898	0.26898	0.623546	0.0260888	0.192533	0.0163733	0.767882	0.294728	4.97949e-07	4.97949e-07	blue
RPF2	-0.0648785	0.0572513	0.114815	0.0567255	0.0286818	0.112848	-0.168534	0.168534	0.233503	0.293223	0.0345872	0.297686	0.598717	0.0378276	0.00184639	0.00184639	grey
APPL1	-0.0415101	-0.0261723	0.10244	0.0097233	-0.0277137	0.00148717	-0.112402	0.112402	0.446186	0.631095	0.0595487	0.858434	0.61112	0.978236	0.0385966	0.0385966	turquoise
UPF2	0.0151369	0.0571259	0.202513	0.071761	0.0399473	0.155425	-0.147519	0.147519	0.781253	0.294283	0.000174131	0.187477	0.463507	0.00412353	0.00650884	0.00650884	turquoise
NRK	-0.0603222	-0.207664	0.186642	0.104621	0.0494976	0.0314969	0.438813	-0.438813	0.268054	0.000117421	0.000552047	0.054298	0.363594	0.563317	2.18125e-17	2.18125e-17	brown
SLPI	-0.00588638	0.0520115	-0.0738203	0.0777172	0.031752	0.0194771	-0.142139	0.142139	0.914011	0.339707	0.175097	0.153349	0.56016	0.720852	0.00877482	0.00877482	grey
ITGB3BP	-0.010747	0.0917717	0.0430036	-0.00718962	0.014838	0.0175739	-0.23142	0.23142	0.843712	0.0916	0.429983	0.895073	0.785467	0.74715	1.67957e-05	1.67957e-05	blue
TOR4A	0.00243509	0.116547	0.00600657	0.0153551	0.026576	0.0554167	-0.223947	0.223947	0.964371	0.0319337	0.912262	0.778182	0.625837	0.30899	3.16794e-05	3.16794e-05	turquoise
MED1	0.0449256	0.0504579	0.0707771	0.0243303	0.150081	0.0980895	-0.0821214	0.0821214	0.409639	0.354349	0.193614	0.655323	0.00562658	0.0712782	0.131304	0.131304	turquoise
CLEC5A	0.0341172	0.103903	0.0545439	-0.0112499	-0.0473637	-0.0445673	0.158977	-0.158977	0.531298	0.0559843	0.316684	0.836498	0.384669	0.413388	0.00333607	0.00333607	red
RBM12	0.0354351	0.0374177	0.147569	0.105387	-0.00684067	0.132976	-0.14152	0.14152	0.515547	0.492316	0.00649056	0.0525477	0.900138	0.0142778	0.00907586	0.00907586	turquoise
PDCD4	-0.0195202	0.0188466	-0.069978	-0.0546717	-0.0553494	-0.0245616	-0.141373	0.141373	0.72026	0.729529	0.198705	0.315549	0.309579	0.65226	0.00914859	0.00914859	turquoise
ERO1B	-0.0049673	-0.080124	-0.0215319	0.0385485	-0.00179618	0.00209899	-0.0364854	0.0364854	0.927397	0.140978	0.692824	0.479322	0.973715	0.969286	0.50317	0.50317	midnightblue
RBM43	-0.00644065	-0.0878371	0.195525	0.127527	0.103789	0.0562284	0.319568	-0.319568	0.90595	0.106441	0.00029265	0.0188264	0.0562545	0.301947	1.73622e-09	1.73622e-09	brown
TTLL1	0.066513	-0.0169762	0.0082858	-0.11819	0.074371	-0.0918549	0.241117	-0.241117	0.221911	0.755472	0.879189	0.0295772	0.171892	0.0913053	7.14068e-06	7.14068e-06	grey
QRFP	-0.00117296	-0.00209182	-0.00537853	-0.047055	-0.0166522	-0.0172483	-0.00813545	0.00813545	0.982833	0.969391	0.921405	0.387779	0.759994	0.751679	0.881365	0.881365	grey
WDR90	0.0833072	0.120214	0.0662901	0.0327174	0.0161983	0.0686779	-0.214861	0.214861	0.125808	0.026882	0.223467	0.548289	0.766344	0.207196	6.66131e-05	6.66131e-05	blue
SDAD1	-0.0173202	0.0500977	0.123586	0.034848	0.0182891	0.116881	-0.0548642	0.0548642	0.750679	0.357799	0.0228592	0.522535	0.737231	0.031441	0.313846	0.313846	turquoise
MSANTD4	-0.0217368	-7.96951e-05	0.0941148	0.0614621	-0.0225648	0.0336091	0.046827	-0.046827	0.690051	0.998834	0.0835803	0.259098	0.678889	0.537434	0.390085	0.390085	turquoise
HAUS5	-0.0304011	0.0542947	0.0128843	-0.0566092	0.0580457	0.0421356	-0.143956	0.143956	0.576978	0.318903	0.813154	0.298679	0.286565	0.439359	0.00794111	0.00794111	blue
SBNO2	0.0115839	0.114175	0.0258322	-0.0686058	0.0444711	0.0131913	0.0105002	-0.0105002	0.831716	0.0356158	0.63554	0.207675	0.414397	0.808788	0.847256	0.847256	turquoise
FCGRT	0.0324393	0.0146491	-0.035477	0.0158288	0.00437806	-0.0331892	6.54289e-06	-6.54289e-06	0.551695	0.788132	0.515051	0.771525	0.93599	0.542532	0.999904	0.999904	grey
MED28	0.055735	-0.104562	0.129799	0.0861537	-0.0172434	0.089761	0.0300455	-0.0300455	0.306216	0.0544361	0.0167958	0.113343	0.751748	0.0989628	0.581443	0.581443	turquoise
ZFHX2	0.0403458	-0.127168	-0.01471	0.0363821	0.00802197	0.0514571	0.0975481	-0.0975481	0.459055	0.0191663	0.787273	0.504381	0.883008	0.344887	0.0728614	0.0728614	turquoise
CBY3	-0.00224109	0.00281338	0.0568013	-0.00276191	0.0780724	0.0293076	0.0358257	-0.0358257	0.967208	0.958841	0.29704	0.959593	0.151474	0.590762	0.510926	0.510926	grey
ZNF622	-0.0208033	0.125472	0.00563181	-0.0511515	0.00977143	0.0515728	-0.0919053	0.0919053	0.702717	0.0208446	0.917717	0.347764	0.857741	0.343802	0.0911268	0.0911268	blue
MYSM1	0.107711	0.151988	0.0760827	0.0982346	0.0143635	0.0880929	-0.141482	0.141482	0.0475228	0.00504149	0.162208	0.0708587	0.792168	0.105421	0.00909473	0.00909473	turquoise
ANXA3	0.0711674	0.0569663	0.013261	-0.019724	0.0136837	0.00618248	-0.0642911	0.0642911	0.191162	0.295637	0.807797	0.717463	0.801795	0.909704	0.237772	0.237772	grey
HS3ST3A1	-0.00782542	0.0426623	-0.0154586	-0.0783953	0.120781	-0.0493798	0.327242	-0.327242	0.885855	0.433655	0.776725	0.149783	0.0261649	0.364738	6.6702e-10	6.6702e-10	lightgreen
CEACAM19	0.0995766	-0.028338	-0.0259626	-0.0429021	0.0580177	0.0132998	0.0164786	-0.0164786	0.0670735	0.603109	0.633834	0.431073	0.286798	0.807245	0.762421	0.762421	grey
SZRD1	0.0446514	-0.0110154	0.0218941	-0.00127253	0.0140378	0.0142321	0.076768	-0.076768	0.412506	0.83986	0.687925	0.981376	0.796776	0.794026	0.158448	0.158448	blue
GPSM2	-0.00864944	0.106108	0.0389803	-0.0687615	-0.0529541	0.0212547	-0.237855	0.237855	0.873931	0.0509432	0.474409	0.206642	0.331016	0.696582	9.56005e-06	9.56005e-06	blue
SLC20A1	0.00871521	0.025625	0.050714	0.143308	0.000377686	0.120338	-0.101788	0.101788	0.87298	0.638255	0.351908	0.00823004	0.994472	0.0267232	0.0611975	0.0611975	purple
NPIPB3	0.0405372	0.0661317	0.033868	0.113709	0.0579551	0.0866402	0.00892758	-0.00892758	0.456926	0.224578	0.534303	0.0363792	0.28732	0.111313	0.869912	0.869912	grey
ADGRA3	0.0494331	0.0323945	0.013633	0.0566493	0.0504737	-0.000819389	-0.0501485	0.0501485	0.36422	0.552245	0.802515	0.298337	0.354198	0.988008	0.357311	0.357311	turquoise
POLG	0.0656035	0.0456433	-0.0225379	0.0354633	0.0143875	0.110997	-0.0489097	0.0489097	0.22831	0.402191	0.679251	0.515213	0.791828	0.041109	0.369327	0.369327	turquoise
IGF1R	-0.0735716	-0.111939	0.0663364	-0.0526911	-0.021019	0.0446303	-0.0244364	0.0244364	0.176559	0.0394091	0.223143	0.333427	0.699783	0.412727	0.653918	0.653918	darkred
F2RL2	0.0553514	-0.0391084	0.145113	0.0839027	-0.0239183	0.0973808	0.209061	-0.209061	0.309562	0.472957	0.0074479	0.123116	0.660792	0.0733564	0.000105342	0.000105342	yellow
SLA	-0.0583066	0.0142125	0.10614	0.0286093	-0.00516833	0.0571992	0.0821081	-0.0821081	0.284401	0.794303	0.0508732	0.599642	0.924467	0.293663	0.131367	0.131367	red
RPL38	-0.0847184	-0.0727296	0.0211574	-0.0698905	0.0117688	0.0408411	0.0663696	-0.0663696	0.119502	0.181576	0.697903	0.199269	0.829071	0.453556	0.222911	0.222911	grey
PTPN12	0.071515	0.0566582	0.134769	0.0308522	0.0677462	0.0579283	0.0762581	-0.0762581	0.188998	0.298261	0.0130088	0.571336	0.21344	0.287543	0.16124	0.16124	turquoise
FGF10	-0.00988496	-0.148005	0.12016	0.081945	0.0785549	-0.0789995	0.328963	-0.328963	0.856106	0.00633249	0.0269506	0.132137	0.148954	0.14666	5.36262e-10	5.36262e-10	brown
ZNF318	0.0481835	0.11396	0.0307841	-0.0342015	-0.0211341	-0.0246399	-0.113883	0.113883	0.376487	0.0359655	0.572185	0.530283	0.698219	0.651225	0.0360919	0.0360919	grey60
RHEB	-0.0603342	0.0255191	0.111576	-0.0576554	0.0447735	0.0137972	0.000542726	-0.000542726	0.267958	0.639644	0.0400576	0.289823	0.411228	0.800185	0.992057	0.992057	blue
RASD2	0.0426375	-0.0761713	0.0515213	-0.0141412	0.0128327	-0.0569357	0.392207	-0.392207	0.433924	0.161718	0.344285	0.795312	0.813888	0.295896	6.52323e-14	6.52323e-14	brown
PRRT2	0.0279369	0.0370727	0.122082	0.115169	0.115039	0.0928237	0.163361	-0.163361	0.60825	0.496319	0.0245833	0.0340309	0.0342344	0.0879264	0.00255314	0.00255314	grey
ZNF350	-0.0847611	0.033272	0.113628	0.032179	0.00587506	0.0602495	0.0162548	-0.0162548	0.119315	0.541524	0.036513	0.554893	0.914176	0.268632	0.765553	0.765553	grey
TONSL	-0.00537322	0.146945	-0.0354672	-0.0312813	0.0119941	0.0117629	-0.292864	0.292864	0.921482	0.00672272	0.515167	0.565993	0.825849	0.829154	3.94727e-08	3.94727e-08	blue
ZNF664	0.0231438	-0.0185477	0.063471	0.0158471	-0.0194248	0.0761591	-0.0999932	0.0999932	0.671124	0.733656	0.243823	0.771268	0.72157	0.161786	0.0659328	0.0659328	turquoise
IL10RA	-0.0511052	-0.000823447	0.117143	0.0520237	0.0264551	0.0698217	0.131913	-0.131913	0.348201	0.987948	0.0310604	0.339594	0.627409	0.199713	0.0150805	0.0150805	red
TYK2	0.100298	0.0486537	0.0694885	-0.0252302	0.0319368	0.0688104	-0.0725018	0.0725018	0.0651087	0.371841	0.201872	0.64344	0.557877	0.206319	0.182952	0.182952	turquoise
FAHD2B	-0.00504138	-0.0533449	0.0176942	-0.0635005	-0.0101412	-0.0382527	0.0185615	-0.0185615	0.926317	0.327455	0.745479	0.243604	0.852418	0.482702	0.733464	0.733464	grey
TIPIN	-0.0486846	0.0643458	0.0562277	-0.0438392	-0.0101724	0.046918	-0.23577	0.23577	0.371537	0.237372	0.301952	0.421068	0.851969	0.389163	1.14948e-05	1.14948e-05	blue
BDH1	-0.0972965	0.117587	-0.0355794	-0.0445596	-0.00980756	0.00852198	-0.309736	0.309736	0.0736071	0.0304239	0.513838	0.413468	0.85722	0.875773	5.68849e-09	5.68849e-09	grey
PSMB5	-0.0771404	0.113224	-0.031564	0.00769392	-0.00819237	0.0566242	-0.167426	0.167426	0.156433	0.0371885	0.562486	0.88776	0.880541	0.298551	0.00198072	0.00198072	blue
LRIG1	0.0607198	-0.146318	0.136781	0.00230931	0.102999	-0.0353903	0.24743	-0.24743	0.264906	0.0069633	0.0117037	0.96621	0.0581647	0.516079	4.0127e-06	4.0127e-06	brown
KCTD1	0.0183915	-0.0188694	0.0264701	0.0812212	0.0286777	-0.00446094	-0.0448083	0.0448083	0.735815	0.729215	0.627215	0.135599	0.59877	0.934781	0.410864	0.410864	grey
NR5A2	0.00285574	0.0401925	0.00338809	0.0362501	0.0541725	0.0568014	-0.152697	0.152697	0.958221	0.460765	0.950443	0.50593	0.319995	0.297039	0.00483839	0.00483839	grey
CLBA1	0.0362609	0.0189027	0.0669418	0.0480552	0.0930522	0.135023	-0.062025	0.062025	0.505803	0.728756	0.218938	0.377759	0.0871443	0.0128373	0.254753	0.254753	blue
NOTCH2	-0.0130981	-0.109783	0.130848	0.113753	0.0536498	0.0796483	0.321086	-0.321086	0.810112	0.0433879	0.0159248	0.0363067	0.324693	0.143361	1.44e-09	1.44e-09	turquoise
RECQL	0.0269923	0.0534848	0.167879	0.114068	0.00541226	0.140434	0.000392947	-0.000392947	0.620434	0.326186	0.00192477	0.0357885	0.920914	0.00962668	0.994249	0.994249	turquoise
FN3KRP	0.0208767	0.0645739	0.00305214	-0.0437551	0.0700127	-0.0281362	-0.0383162	0.0383162	0.701718	0.23571	0.955351	0.42196	0.198482	0.605693	0.481976	0.481976	blue
TMOD1	-0.0248193	-0.167787	0.0916929	0.0372813	0.0167905	-0.0315603	0.400664	-0.400664	0.648854	0.00193604	0.0918801	0.493897	0.758062	0.562532	1.67222e-14	1.67222e-14	brown
ELAC2	-0.118496	0.0779089	0.0714322	0.004209	0.0291234	0.0318296	-0.143714	0.143714	0.0291553	0.152335	0.189512	0.938456	0.593098	0.559201	0.00804772	0.00804772	blue
FXYD6	-0.0468929	-0.144846	0.102021	-0.0375356	-0.0211265	-0.0377194	0.478469	-0.478469	0.389418	0.00755941	0.0606038	0.490953	0.698322	0.488831	8.48781e-21	8.48781e-21	brown
MRPL10	-0.0473335	-0.0637105	0.0548754	0.0325821	0.0888056	0.0689323	0.0705323	-0.0705323	0.384973	0.242045	0.313747	0.549945	0.102622	0.205514	0.195163	0.195163	blue
NCAPH2	-0.0100517	0.0192693	-0.0490606	-0.0242962	0.016196	-0.0179391	-0.140173	0.140173	0.853706	0.723708	0.36785	0.655775	0.766376	0.742079	0.00976357	0.00976357	blue
PAQR3	-0.0954703	0.115703	0.122947	0.000314981	-0.000953181	0.00997722	-0.0322721	0.0322721	0.0792056	0.0332036	0.0235786	0.99539	0.98605	0.854778	0.553749	0.553749	turquoise
DPYSL3	-0.0105714	-0.166566	0.145275	0.0352257	0.0333794	-0.0461658	0.49936	-0.49936	0.846233	0.00209095	0.00738103	0.518033	0.54022	0.39682	8.82693e-23	8.82693e-23	brown
APBA2	-0.0342001	-0.00788844	0.0633255	0.0546615	0.0770679	0.0780214	0.282229	-0.282229	0.5303	0.884942	0.244908	0.31564	0.156823	0.151742	1.25697e-07	1.25697e-07	yellow
ANTXR2	-0.0475004	-0.0870705	0.166018	0.0725974	0.0487074	0.0136493	0.351688	-0.351688	0.383298	0.109542	0.00216416	0.182373	0.371313	0.802283	2.63812e-11	2.63812e-11	brown
MICOS10	0.0139308	-0.0339651	-0.0448971	-0.0340401	-0.012466	-0.0371986	-0.0578526	0.0578526	0.798292	0.533131	0.409936	0.532226	0.819114	0.494857	0.288174	0.288174	grey
SERPINI1	-0.0245585	0.0346503	-0.0427602	0.00158222	-0.0292959	-0.0347323	0.0229029	-0.0229029	0.652301	0.524897	0.4326	0.976845	0.59091	0.523917	0.67435	0.67435	midnightblue
UBE2J1	-0.0333689	0.0378216	0.150422	0.127454	0.00130243	0.108381	-0.107511	0.107511	0.540347	0.487654	0.00551779	0.0188951	0.980939	0.0461514	0.0479377	0.0479377	turquoise
THOC1	-0.029851	0.093974	0.0905586	0.0810896	-0.0128787	0.105239	-0.216194	0.216194	0.583893	0.0840458	0.0959877	0.136235	0.813234	0.0528835	5.98448e-05	5.98448e-05	blue
EOMES	-0.0338968	-0.0342472	0.184857	0.107836	0.00223795	0.120255	0.149263	-0.149263	0.533956	0.529734	0.000624995	0.0472651	0.967254	0.0268294	0.00589603	0.00589603	green
KIAA1324	0.117554	0.0827597	-0.22259	-0.112102	0.0612309	-0.140818	-0.186179	0.186179	0.0304711	0.128323	3.54698e-05	0.0391214	0.260898	0.00942864	0.000570137	0.000570137	grey
HIST1H3F	-0.0675558	-0.118714	-0.0904364	-0.0485256	-0.0909627	-0.0188813	-0.0714094	0.0714094	0.214732	0.0288577	0.0964388	0.373103	0.0945078	0.729051	0.189654	0.189654	grey
REM2	-0.0108495	0.122103	-0.0568508	0.00445871	0.0179988	0.00735927	-0.0460855	0.0460855	0.84224	0.0245589	0.296619	0.934813	0.741252	0.892612	0.397642	0.397642	grey
MZT2B	-0.108765	0.0725039	0.00678396	-0.0246804	0.00887721	0.00526848	-0.0627825	0.0627825	0.0453801	0.182939	0.900962	0.650689	0.870639	0.923008	0.248986	0.248986	grey
MCL1	0.0390187	0.0582941	0.106272	0.0392928	-0.00353284	0.0166837	0.0576832	-0.0576832	0.473973	0.284505	0.050584	0.47087	0.948328	0.759555	0.289591	0.289591	turquoise
LRRC26	0.046551	-0.0201235	-0.04198	0.0300813	0.0705243	-0.159614	0.063182	-0.063182	0.392888	0.711992	0.441052	0.580994	0.195214	0.00321019	0.245981	0.245981	grey
POPDC3	-0.0901965	0.0421754	-0.0156593	0.0343448	0.0524289	0.0286227	-0.0988347	0.0988347	0.0973295	0.438926	0.773905	0.528561	0.335841	0.599471	0.0691451	0.0691451	grey
G2E3	-0.021753	0.063542	0.0967814	0.0887042	-0.047369	0.127874	-0.168345	0.168345	0.689833	0.243295	0.0751524	0.103017	0.384616	0.0185029	0.00186868	0.00186868	blue
ULK1	0.00940156	-0.0582772	0.0428757	0.0493957	0.0107168	0.0677136	0.14515	-0.14515	0.863071	0.284644	0.431357	0.364584	0.844146	0.213661	0.00743251	0.00743251	turquoise
EXTL2	0.0426748	-0.0387031	0.0801954	0.102286	-0.00926598	0.0218688	0.173334	-0.173334	0.433521	0.477559	0.140623	0.0599357	0.865027	0.688267	0.00135573	0.00135573	turquoise
PBX1	0.0107352	-0.143572	0.0597022	0.0263413	0.00329378	-0.0931002	0.313808	-0.313808	0.843881	0.00811134	0.273012	0.628892	0.95182	0.0869808	3.49819e-09	3.49819e-09	brown
PNMA6A	-0.13318	0.00148939	0.00211042	0.0406972	-0.022942	0.0981611	-0.0761263	0.0761263	0.0141284	0.978203	0.969119	0.45515	0.673826	0.071071	0.161967	0.161967	grey
SLC35D3	0.0230233	0.0759336	-0.0545111	-0.0814401	0.0367025	-0.0683896	0.0513564	-0.0513564	0.672737	0.163035	0.316976	0.134544	0.500632	0.209114	0.345834	0.345834	lightcyan
EP400	0.0543319	-0.0334922	0.145055	0.0775735	0.0399286	0.158913	0.00226308	-0.00226308	0.318571	0.538851	0.00747201	0.154113	0.463717	0.00334883	0.966886	0.966886	turquoise
FCRL1	-0.039385	-0.102768	0.0175761	0.0369589	0.0482127	-0.0022765	0.13034	-0.13034	0.469829	0.0587338	0.747119	0.497643	0.376196	0.96669	0.0163415	0.0163415	green
ADAMTSL4	-0.0245784	-0.0668446	0.027469	0.0389309	0.0168594	-0.0111566	0.280774	-0.280774	0.652037	0.219609	0.614272	0.474969	0.757102	0.837835	1.46724e-07	1.46724e-07	grey
C19orf73	-0.00847626	0.128927	-0.148229	-0.08714	0.0162636	-0.187248	-0.0862876	0.0862876	0.876434	0.0175515	0.00625279	0.109257	0.76543	0.000529098	0.112781	0.112781	grey
SORBS2	0.0613775	-0.094519	-0.0108761	-0.00439379	-0.059255	-0.0272211	0.213646	-0.213646	0.259755	0.0822561	0.841859	0.93576	0.276628	0.617474	7.33988e-05	7.33988e-05	brown
TRMT44	0.0583298	0.0208347	-0.0414271	-0.0169097	0.0248409	0.00933005	-0.114725	0.114725	0.28421	0.702289	0.447097	0.756399	0.648569	0.864103	0.0347308	0.0347308	turquoise
ZNF486	0.0499797	-0.00344488	0.0790423	-0.0171444	0.121732	0.0432467	-0.0538679	0.0538679	0.358934	0.949613	0.14644	0.753127	0.0250014	0.427378	0.322728	0.322728	grey
ZC3H8	0.0504337	0.0407172	0.0174489	0.0113027	0.010689	0.0345931	-0.125992	0.125992	0.35458	0.454928	0.748887	0.835742	0.844544	0.525583	0.0203165	0.0203165	blue
DENND1A	-0.0513358	0.102454	0.165972	0.0425451	0.0260733	0.154547	-0.0880534	0.0880534	0.346027	0.0595148	0.00217036	0.43492	0.632388	0.00434229	0.105578	0.105578	blue
GBP5	0.00721421	0.0705843	0.144274	0.0064805	0.0426301	0.0755931	-0.00924041	0.00924041	0.894716	0.194833	0.00780267	0.905371	0.434003	0.164935	0.865396	0.865396	tan
RARRES1	-0.08462	-0.0450773	0.140189	0.0741187	0.00851486	0.0521045	-0.0141085	0.0141085	0.119933	0.408058	0.00975482	0.173355	0.875876	0.338844	0.795775	0.795775	grey
PRPH2	0.0686461	-0.169853	0.0940237	0.00809931	0.0204649	-0.00510576	0.37992	-0.37992	0.207407	0.00169755	0.0838813	0.881888	0.707329	0.925379	4.40166e-13	4.40166e-13	brown
ENTPD6	0.163991	0.168934	0.00861452	-0.00486749	-0.032104	0.000185942	-0.280586	0.280586	0.00245555	0.0018001	0.874435	0.928852	0.555817	0.997278	1.49677e-07	1.49677e-07	blue
CFB	-0.0466643	0.0251327	0.0101287	-0.0290611	-0.0412935	0.00575252	-0.107935	0.107935	0.391736	0.644723	0.852597	0.59389	0.448565	0.915959	0.0470609	0.0470609	grey
STMP1	0.0310795	0.00423876	-0.0345189	-0.0717901	-0.010722	-0.0937841	-0.071042	0.071042	0.568502	0.938022	0.526472	0.187297	0.84407	0.0846767	0.191947	0.191947	orange
ANAPC1	-0.0047517	0.0292207	0.0963784	0.0784191	0.0609643	0.0983656	-0.228084	0.228084	0.93054	0.591863	0.0763799	0.14966	0.262984	0.0704817	2.23546e-05	2.23546e-05	turquoise
CDO1	-0.0555746	-0.189502	0.122788	0.0829796	-0.00825434	-0.00535229	0.506037	-0.506037	0.307612	0.000451396	0.0237607	0.127308	0.879645	0.921787	1.91789e-23	1.91789e-23	yellow
ASGR1	-0.00591813	-0.015395	-0.0941947	-0.0671636	0.00578264	-0.0685859	-0.0910595	0.0910595	0.913549	0.77762	0.0833171	0.217412	0.915521	0.207807	0.0941563	0.0941563	grey
TNPO3	0.0018805	0.0509121	0.0405286	-0.0180485	0.0709532	0.0364215	-0.142737	0.142737	0.972482	0.350028	0.457022	0.740564	0.192505	0.50392	0.00849209	0.00849209	blue
PIGO	0.0128846	0.0650595	-0.0594306	-0.0350094	0.0408373	0.0753301	-0.197019	0.197019	0.81315	0.232199	0.275204	0.520608	0.453598	0.166414	0.000262289	0.000262289	skyblue
NDUFA3	-0.12398	-0.0562455	-0.130615	-0.0311269	-0.0526222	-0.0604771	0.0736389	-0.0736389	0.0224243	0.3018	0.0161147	0.567912	0.33406	0.266824	0.176163	0.176163	turquoise
NR6A1	0.0123745	0.0468045	0.00472941	-0.0912887	-0.0301612	-0.0162652	-0.165445	0.165445	0.82042	0.390313	0.930865	0.0933274	0.579988	0.765407	0.00224312	0.00224312	grey
MARVELD1	-0.0425734	-0.132531	0.13527	0.0649485	-0.0126	0.0491369	0.560977	-0.560977	0.434615	0.0146093	0.0126723	0.232998	0.817204	0.367105	1.70793e-29	1.70793e-29	brown
CPT2	-0.0274667	0.0296811	0.00232177	0.0184127	-0.0443473	-0.00071635	-0.301552	0.301552	0.614301	0.586036	0.966028	0.735521	0.415699	0.989516	1.47845e-08	1.47845e-08	turquoise
PI4K2A	0.0493941	-0.0563423	0.0656615	0.0354338	0.00477538	0.0530578	0.110147	-0.110147	0.3646	0.300967	0.227897	0.515563	0.930195	0.330069	0.0426921	0.0426921	purple
C14orf93	0.15291	0.0203276	-0.0555289	0.0338914	0.0270854	0.0636333	-0.108645	0.108645	0.00477871	0.709202	0.30801	0.53402	0.619228	0.242617	0.0456196	0.0456196	blue
NREP	0.0406166	-0.1	0.103379	0.104166	-0.0329869	0.0479177	0.336619	-0.336619	0.456045	0.065913	0.0572394	0.0553623	0.544997	0.379128	1.99754e-10	1.99754e-10	grey
MAFK	0.0458966	0.0607179	0.0501024	0.0402828	0.00782295	0.0928161	0.0568798	-0.0568798	0.399582	0.264922	0.357754	0.459758	0.885891	0.0879524	0.296372	0.296372	turquoise
PLCD4	-0.0313682	-0.10396	0.0240394	-0.0149276	0.0788932	-0.054815	0.239888	-0.239888	0.564914	0.0558468	0.659183	0.784203	0.147206	0.314281	7.97453e-06	7.97453e-06	brown
STK35	0.0544841	0.0763667	0.0315349	0.0226422	-0.0535696	0.051092	-0.143327	0.143327	0.317215	0.160642	0.562847	0.677849	0.325419	0.348326	0.0082215	0.0082215	blue
KIF1B	0.12032	-0.0100539	0.0689128	0.0514847	0.0340854	0.0381914	0.0118617	-0.0118617	0.0267466	0.853674	0.205643	0.344629	0.531681	0.483405	0.827742	0.827742	turquoise
SIPA1	-0.0452334	-0.00627637	0.0524423	0.0270442	0.0478793	0.0689547	0.291426	-0.291426	0.406435	0.908338	0.335717	0.619762	0.37951	0.205367	4.62968e-08	4.62968e-08	green
PTGR1	0.0561875	-0.0960278	-0.114249	0.0341515	0.00258022	-0.00494831	-0.159255	0.159255	0.302299	0.0774611	0.0354956	0.530884	0.962249	0.927674	0.00328055	0.00328055	grey
RPS24	0.00458983	-0.0878111	0.0569852	0.111159	-0.0678564	0.0676745	0.0459571	-0.0459571	0.932901	0.106544	0.295476	0.0408113	0.212694	0.213926	0.39896	0.39896	grey
MFN2	0.017171	-0.000170933	0.0176923	0.0359085	0.00129352	-0.00488762	-0.0395781	0.0395781	0.752756	0.997498	0.745506	0.50995	0.981069	0.928558	0.467652	0.467652	turquoise
RBMS2	0.0437614	-0.0167754	0.157831	0.109944	0.0185452	0.136581	0.197971	-0.197971	0.421893	0.758273	0.00357376	0.0430794	0.733689	0.0118278	0.00024451	0.00024451	turquoise
LSAMP	-0.0155838	-0.134938	0.145422	0.0928361	-0.00111513	0.0168008	0.387099	-0.387099	0.774966	0.0128941	0.00732106	0.0878839	0.98368	0.757919	1.45677e-13	1.45677e-13	brown
RPL9	-0.0246188	-0.0147823	0.0391607	-0.0383348	-0.107113	0.0358485	-0.0349074	0.0349074	0.651504	0.786252	0.472364	0.481763	0.0487747	0.510657	0.521824	0.521824	grey
GPR171	-0.0391497	-0.0279573	0.216849	0.0153818	0.0286319	0.0706017	0.129309	-0.129309	0.472488	0.607988	5.67661e-05	0.777806	0.599354	0.194724	0.0172166	0.0172166	tan
RXRB	0.00447569	0.0427728	-0.0112633	0.00723751	-0.0132893	0.0107808	-0.025167	0.025167	0.934565	0.432464	0.836306	0.894378	0.807394	0.843227	0.644271	0.644271	darkgreen
ABHD5	-0.0499411	-0.012642	0.0156776	0.0641637	-0.0288441	-0.00883543	-0.0443392	0.0443392	0.359306	0.816606	0.773648	0.238705	0.59665	0.871243	0.415784	0.415784	turquoise
CREG1	0.066274	-0.0348408	0.0561926	0.00541358	-0.0189393	-0.0567659	0.0119185	-0.0119185	0.223579	0.52262	0.302255	0.920894	0.728252	0.297341	0.826931	0.826931	turquoise
GCNT2	0.0630659	-0.0594388	-0.0581756	0.0727797	0.0711153	-0.033049	0.00568263	-0.00568263	0.246852	0.275138	0.285486	0.181275	0.191488	0.544239	0.916977	0.916977	grey
POLR2I	-0.0782641	-0.0206215	-0.050878	-0.0354625	-0.0208863	0.00652055	-0.00252738	0.00252738	0.150468	0.705193	0.350351	0.515223	0.701587	0.904789	0.963022	0.963022	grey
SNRNP35	-0.00551504	-0.0521215	0.0433069	-0.0171798	-0.0387348	0.0688418	0.0677714	-0.0677714	0.919417	0.338686	0.426734	0.752634	0.477198	0.206111	0.213269	0.213269	grey
LIMD2	-0.0820464	-0.0485445	0.0101645	-0.0223195	-0.00569254	0.0199576	0.111015	-0.111015	0.131657	0.372917	0.852083	0.682188	0.916833	0.714263	0.041075	0.041075	red
DCAF7	0.0210426	0.0598116	0.0250622	0.00582069	0.0380354	0.0502955	-0.14355	0.14355	0.699462	0.272133	0.645651	0.914967	0.485195	0.355901	0.00812114	0.00812114	turquoise
RHOC	-0.0507517	0.0124851	-0.0313846	-0.0826269	0.0376171	-0.0266802	0.154696	-0.154696	0.35155	0.818841	0.56471	0.128939	0.490012	0.624483	0.00430442	0.00430442	grey
CDON	-0.0418654	-0.12923	0.120961	0.0242846	0.0306631	-0.0473586	0.37144	-0.37144	0.442301	0.0172857	0.0259418	0.655929	0.573697	0.384721	1.57025e-12	1.57025e-12	brown
RIPPLY3	0.0416827	-0.0310453	-0.0890264	-0.106237	0.0563585	-0.0256956	-0.0251643	0.0251643	0.444296	0.568928	0.101767	0.0506618	0.300828	0.637329	0.644307	0.644307	black
CDS2	0.0647489	-0.0487463	0.128552	0.00595702	-0.0229909	-0.000409947	0.175061	-0.175061	0.23444	0.370931	0.0178856	0.912983	0.673171	0.994	0.00121075	0.00121075	brown
LRRC32	0.000820986	-0.0934188	0.141184	0.0393861	0.0303598	0.0685931	0.555293	-0.555293	0.987984	0.085901	0.00924331	0.469817	0.577496	0.207759	8.15294e-29	8.15294e-29	yellow
DCP2	0.0815195	0.030219	0.140319	0.164913	0.0035174	0.138266	-0.0883715	0.0883715	0.134164	0.579262	0.00968683	0.00231876	0.948554	0.0108157	0.10432	0.10432	turquoise
CALHM2	-0.0661709	-0.103263	0.0669731	0.0413721	0.00474824	0.0336007	0.464567	-0.464567	0.224302	0.0575201	0.218722	0.447701	0.930591	0.537536	1.49652e-19	1.49652e-19	yellow
UQCRC1	-0.0531252	0.085762	-0.0886183	-0.0724039	-0.0748067	-0.077178	-0.253909	0.253909	0.329454	0.114998	0.103352	0.183545	0.169387	0.15623	2.18492e-06	2.18492e-06	blue
CENPE	-0.072343	0.0107251	0.118434	-0.0111247	-0.0268993	0.0643031	-0.205841	0.205841	0.183914	0.844026	0.0292405	0.838293	0.621639	0.237684	0.000135149	0.000135149	blue
EIF2AK2	-0.0400578	0.0381315	0.198087	0.0602596	0.0230615	0.111747	0.0376401	-0.0376401	0.46227	0.484092	0.000242429	0.268551	0.672226	0.0397517	0.489746	0.489746	grey
LRRIQ4	0.0754622	0.0333365	-0.0175377	0.0100324	0.00927758	-0.0591942	-0.0765683	0.0765683	0.16567	0.540741	0.747653	0.853983	0.86486	0.277122	0.159537	0.159537	grey
PRICKLE3	-0.0722477	0.113257	0.00449444	-0.123442	-0.00635054	0.0403457	-0.0764723	0.0764723	0.184494	0.0371338	0.934292	0.0230193	0.90726	0.459056	0.160062	0.160062	blue
ENDOV	0.121674	-0.000858569	-0.00125431	0.0197691	0.0371596	0.0230816	0.0750719	-0.0750719	0.0250706	0.987434	0.981643	0.716845	0.495309	0.671956	0.167876	0.167876	grey
INTS4	0.010335	0.0815415	0.0443789	0.0171069	-0.0211212	0.0853171	-0.0868313	0.0868313	0.849631	0.134058	0.415367	0.753649	0.698394	0.116902	0.110523	0.110523	grey
MINDY1	0.108006	-0.104992	-0.110232	-0.0196221	0.0316151	-0.0385927	0.00552655	-0.00552655	0.0469145	0.0534453	0.0425314	0.718862	0.561854	0.478817	0.919249	0.919249	turquoise
XDH	0.0172323	0.159437	-0.0858522	-0.0545703	0.0301957	-0.0334808	-0.185699	0.185699	0.751903	0.00324467	0.114615	0.316449	0.579555	0.538989	0.000589514	0.000589514	grey
INKA1	-0.0371308	-0.103038	-0.0618779	-0.0555764	-0.0110994	-0.033743	0.323872	-0.323872	0.495644	0.0580702	0.255884	0.307596	0.838657	0.535814	1.01869e-09	1.01869e-09	red
ZDHHC20	0.0620621	0.0247951	0.107774	0.0468296	-0.0515926	0.0790272	-0.217473	0.217473	0.254469	0.649174	0.0473913	0.390058	0.343617	0.146517	5.39701e-05	5.39701e-05	turquoise
ANKRD42	-0.0736738	0.0169881	0.122399	0.0101782	-0.0741016	0.0805506	0.00700131	-0.00700131	0.175957	0.755306	0.0242106	0.851886	0.173454	0.138867	0.897806	0.897806	turquoise
SLC43A2	0.104548	0.0503089	0.0336199	0.0214554	-0.0164269	0.0155022	0.0143987	-0.0143987	0.0544681	0.355774	0.537303	0.69386	0.763145	0.776112	0.79167	0.79167	grey
RTEL1-TNFRSF6B	0.0615272	0.159624	0.0310889	0.0240487	0.0147034	0.0784342	-0.0642312	0.0642312	0.258593	0.0032081	0.568385	0.65906	0.787366	0.149581	0.23821	0.23821	turquoise
C9orf78	-0.0272043	0.0566335	0.10145	-0.0515491	0.0223213	-0.0562235	0.0196865	-0.0196865	0.61769	0.298471	0.0620686	0.344025	0.682164	0.301989	0.717977	0.717977	blue
BMP8A	0.0152975	0.0206054	0.153143	0.0350367	0.0544607	0.128017	0.290844	-0.290844	0.778992	0.705412	0.00471434	0.520283	0.317423	0.018371	4.93672e-08	4.93672e-08	yellow
SMARCD1	0.00306309	-0.0127832	0.0334274	0.0396165	0.0498179	0.104551	-0.115245	0.115245	0.955191	0.814594	0.539638	0.467221	0.360494	0.054461	0.0339123	0.0339123	turquoise
ABCC1	0.0787216	0.0257262	0.0910659	0.070285	0.100232	0.0597141	0.0759542	-0.0759542	0.14809	0.636928	0.0941328	0.196738	0.0652864	0.272916	0.162921	0.162921	turquoise
STAT1	-0.0366964	0.09811	0.170628	0.0339198	0.0219429	0.0710675	-0.054775	0.054775	0.500703	0.071219	0.0016152	0.533677	0.687266	0.191788	0.314635	0.314635	tan
IL18BP	0.0187295	-5.97639e-05	0.179342	-0.00992733	0.00952312	0.100516	0.140268	-0.140268	0.731144	0.999125	0.000910628	0.855496	0.861319	0.0645242	0.00971352	0.00971352	tan
PRX	-0.0346414	-0.110604	0.0939294	0.0107297	0.0679593	0.0603692	0.275306	-0.275306	0.525005	0.0418345	0.0841938	0.843961	0.212	0.26768	2.60401e-07	2.60401e-07	brown
COQ8B	0.0357169	-0.00533901	-0.0817825	-0.012661	0.00809548	-0.00587086	0.0210729	-0.0210729	0.512211	0.921981	0.132908	0.816335	0.881944	0.914237	0.699051	0.699051	blue
ZC3H18	0.00464322	0.0626439	0.0420725	0.0154232	0.0495863	0.0348665	-0.140959	0.140959	0.932122	0.250034	0.440044	0.777223	0.362733	0.522313	0.00935681	0.00935681	blue
ZNF500	0.0429706	-0.0951761	0.0840074	0.0452091	0.0507711	0.0797281	0.206841	-0.206841	0.430338	0.0801391	0.122647	0.406687	0.351365	0.142959	0.000125132	0.000125132	turquoise
TSC2	0.136085	-0.0499256	0.0648453	0.0688912	0.0471049	0.0480575	0.0728511	-0.0728511	0.0121414	0.359455	0.233743	0.205785	0.387275	0.377737	0.180846	0.180846	turquoise
POMC	-0.0917457	0.0295905	-0.0429175	-0.0574927	-0.0115644	-0.0436122	0.00718148	-0.00718148	0.0916925	0.587181	0.430908	0.29119	0.831995	0.423478	0.895191	0.895191	grey
METTL22	0.108546	-0.00250131	0.0642227	0.0800162	0.145863	0.0587209	0.168719	-0.168719	0.0458175	0.963403	0.238273	0.141515	0.00714297	0.280987	0.0018248	0.0018248	turquoise
STRIP1	0.0640617	0.0236061	-0.00635254	-0.0365129	0.0062475	0.00740973	-0.0527538	0.0527538	0.239454	0.66495	0.907231	0.502849	0.908758	0.89188	0.332851	0.332851	turquoise
ZNF598	0.0176088	0.100897	0.0111532	-0.00193173	0.0631695	0.0229981	-0.146672	0.146672	0.746665	0.0635129	0.837885	0.971732	0.246075	0.673075	0.00682674	0.00682674	blue
HSPA1L	-0.111776	-0.106562	-0.056493	-0.0258675	0.0123918	-0.0498446	0.0816655	-0.0816655	0.0397001	0.0499546	0.299673	0.635078	0.820172	0.360236	0.133466	0.133466	grey
RILP	-0.0576861	0.130076	-0.0332008	-0.040281	-0.0690802	-0.0594751	-0.080732	0.080732	0.289566	0.0165614	0.542391	0.459778	0.204541	0.274844	0.137977	0.137977	grey
JMJD7-PLA2G4B	0.177789	0.00719124	0.00668513	0.0607362	0.0483836	0.0177439	-0.0402712	0.0402712	0.00101053	0.89505	0.902398	0.264777	0.374505	0.744789	0.459887	0.459887	turquoise
ZNF532	0.0396965	-0.0559288	0.168239	0.0405137	0.0470021	0.0729994	0.333263	-0.333263	0.466322	0.304534	0.00188136	0.457187	0.388313	0.179957	3.08986e-10	3.08986e-10	turquoise
STRA6	0.0734991	-0.144089	-0.0100169	-0.0213157	-0.0388831	0.0205723	-0.0289826	0.0289826	0.176987	0.00788323	0.854207	0.695754	0.475512	0.705864	0.594887	0.594887	greenyellow
CDH11	0.02468	-0.132103	0.202561	0.098805	0.0159287	0.0794666	0.669644	-0.669644	0.650695	0.0149346	0.000173501	0.0692291	0.770123	0.144279	1.86611e-45	1.86611e-45	yellow
ATP2A3	0.0436696	-0.0126391	-0.0252675	0.0433846	-0.0652152	0.034957	-0.045864	0.045864	0.422868	0.816647	0.642949	0.425904	0.231081	0.521233	0.399917	0.399917	red
ECE2	-0.0436263	0.092413	-0.0534701	-0.0751466	-0.0265821	-0.0236844	-0.107964	0.107964	0.423328	0.0893464	0.326319	0.167452	0.625757	0.663906	0.0470005	0.0470005	blue
HCFC2	0.0242759	-0.133096	0.162975	0.0825423	0.0271685	0.0130579	0.292281	-0.292281	0.656044	0.0141896	0.00261457	0.129332	0.618154	0.810685	4.21126e-08	4.21126e-08	brown
ZNF700	0.0655877	0.118589	0.0862721	0.0239682	0.0320304	0.0699244	-0.212799	0.212799	0.228422	0.0290291	0.112847	0.660129	0.556723	0.19905	7.85129e-05	7.85129e-05	turquoise
CMTM3	0.01312	-0.0229557	0.0999861	0.00206848	0.0694902	-0.00113417	0.57178	-0.57178	0.809801	0.673643	0.065952	0.969732	0.201861	0.983401	8.05108e-31	8.05108e-31	yellow
ACAD8	0.0577878	0.0731044	0.0342223	0.0207141	-0.0277834	0.0582508	-0.216895	0.216895	0.288716	0.17933	0.530033	0.703932	0.610223	0.284864	5.65516e-05	5.65516e-05	turquoise
NKX3-2	0.0107929	-0.154533	0.0646689	-0.0248338	0.042508	-0.0691673	0.316508	-0.316508	0.843052	0.00434581	0.23502	0.648663	0.435322	0.203969	2.52369e-09	2.52369e-09	brown
KCNE3	0.061214	-0.0409883	-0.0483758	0.00951224	-0.0692681	-0.0203968	-0.180887	0.180887	0.26103	0.451929	0.374582	0.861476	0.20331	0.708258	0.000820381	0.000820381	grey
ZNF528	0.0460588	-0.0423107	0.0713837	0.0235153	0.104021	0.0411661	0.134263	-0.134263	0.397916	0.437458	0.189814	0.666161	0.055703	0.449967	0.013356	0.013356	grey
NOMO3	0.0654261	-0.0286749	0.0672439	0.133644	0.0659155	0.0946463	-0.0717624	0.0717624	0.229572	0.598805	0.216861	0.0137929	0.2261	0.0818423	0.187468	0.187468	turquoise
NEK2	-0.0550943	0.0564939	0.019286	7.2304e-05	-0.0116762	0.037983	-0.203818	0.203818	0.311818	0.299666	0.723478	0.998942	0.830395	0.485796	0.000157733	0.000157733	blue
CTHRC1	0.0377555	0.0387782	0.062569	-0.00244925	-0.0250993	-0.00770021	0.536578	-0.536578	0.488415	0.476704	0.250602	0.964164	0.645163	0.887669	1.1392e-26	1.1392e-26	yellow
PCBP1	-0.0591369	0.0603488	0.0232313	-0.0586171	-0.0647085	0.0223525	-0.0629842	0.0629842	0.277588	0.267842	0.669954	0.281841	0.234733	0.681745	0.247465	0.247465	blue
TMEM260	0.0308629	0.116881	0.0926711	0.0472088	-0.0181633	0.112023	-0.185063	0.185063	0.571202	0.0314417	0.0884517	0.386228	0.738973	0.0392617	0.000616137	0.000616137	turquoise
TAF3	0.0127483	-0.0621914	0.208136	0.00999049	0.0708269	0.12051	0.032716	-0.032716	0.815091	0.253478	0.000113207	0.854587	0.1933	0.0265059	0.548306	0.548306	grey
FOXD1	0.00782194	0.0981764	-0.0627022	-0.0655	0.000519153	-0.0348064	-0.150476	0.150476	0.885905	0.0710269	0.249593	0.229046	0.992402	0.523031	0.00550085	0.00550085	grey
AOC2	-0.0878819	0.0438874	0.0871676	0.0464765	-0.0136498	0.0598495	0.0667799	-0.0667799	0.106262	0.420557	0.109145	0.393646	0.802276	0.271828	0.220057	0.220057	turquoise
MANBA	0.0375688	0.0520722	0.102779	0.0677307	0.0449286	-0.0112053	-0.0857536	0.0857536	0.490569	0.339144	0.0587059	0.213545	0.409607	0.837137	0.115034	0.115034	turquoise
ALDH3A1	0.111785	-0.104289	-0.112219	-0.0534728	-0.0600915	-0.0328814	-0.184808	0.184808	0.0396839	0.055072	0.0389161	0.326295	0.269892	0.546284	0.000627119	0.000627119	grey
C9orf16	0.0143034	-0.0105876	-0.0690432	-0.100628	-0.0453325	-0.0149915	0.0721075	-0.0721075	0.793017	0.846001	0.204785	0.0642257	0.405407	0.783302	0.18535	0.18535	grey
CRIP1	-0.124704	0.00667632	0.0125371	-0.029861	0.0123845	0.0683901	-0.00828234	0.00828234	0.0216457	0.902526	0.8181	0.583767	0.820277	0.209111	0.879239	0.879239	red
LRRC41	-0.02953	-0.00458081	-0.0036353	0.0148986	0.0339338	0.023256	-0.0207704	0.0207704	0.587946	0.933032	0.946832	0.784612	0.533508	0.669624	0.703164	0.703164	turquoise
CASP4	-0.0391198	0.0401817	0.096852	0.0328204	-0.00826293	0.064168	-0.100645	0.100645	0.472827	0.460886	0.0749392	0.547029	0.87952	0.238673	0.0641787	0.0641787	tan
SYCE1L	-0.0692513	-0.010377	-0.0204379	-0.0231131	0.0493739	0.0352271	0.130869	-0.130869	0.20342	0.849026	0.707697	0.671534	0.364796	0.518018	0.0159076	0.0159076	cyan
POLR1D	-0.0283656	0.0609319	0.031991	-0.0129763	-0.0544538	0.0781663	-0.124126	0.124126	0.602755	0.263238	0.557209	0.811845	0.317485	0.150981	0.022266	0.022266	blue
TESMIN	0.0047733	0.132395	-0.00652461	-0.0360588	0.011518	0.0200815	-0.118281	0.118281	0.930225	0.0147117	0.90473	0.508179	0.832659	0.712567	0.0294513	0.0294513	grey
RAN	-0.0954223	0.0431156	0.0658982	0.0161477	-0.0414626	0.0972695	-0.185298	0.185298	0.0793573	0.428782	0.226222	0.767052	0.446708	0.0736875	0.000606181	0.000606181	blue
SLC66A3	-0.0355785	-0.0339551	0.181984	-0.000615812	-0.00330361	-0.0111809	0.224621	-0.224621	0.513848	0.533252	0.000761407	0.990987	0.951677	0.837487	2.99438e-05	2.99438e-05	grey
PPT2	-0.0609374	0.0168954	-0.0856165	-0.0355221	-0.00623731	-0.0446085	-0.0308963	0.0308963	0.263195	0.756598	0.115618	0.514516	0.908906	0.412955	0.570786	0.570786	darkgreen
PHGDH	-0.0883434	0.00973139	-0.0127355	0.0672163	-0.0102688	0.0373627	-0.0827702	0.0827702	0.104431	0.858318	0.815274	0.217051	0.850583	0.492954	0.128274	0.128274	grey
CELSR3	0.0266571	0.0335868	0.00382458	-0.0240109	-0.020213	-0.0168946	-0.124568	0.124568	0.624782	0.537704	0.944068	0.659562	0.710768	0.756609	0.0217895	0.0217895	turquoise
AC010522.1	0.0159705	-0.0392017	0.112453	0.0592211	-0.0105924	0.0962444	0.0957375	-0.0957375	0.769537	0.4719	0.0385087	0.276903	0.845931	0.0767918	0.0783656	0.0783656	turquoise
TENT5B	-0.0535732	-0.0969663	-0.117594	-0.0592972	-0.0567769	-0.0667858	0.11483	-0.11483	0.325386	0.0745948	0.0304137	0.276285	0.297247	0.220016	0.0345646	0.0345646	brown
EFHC1	0.101809	0.0678632	-0.0561768	0.0415698	-0.0335096	-0.0122639	-0.107178	0.107178	0.0611445	0.212648	0.302391	0.445533	0.53864	0.821998	0.0486371	0.0486371	turquoise
CRIP3	-0.0329913	0.0568072	-0.0455232	-0.0615917	-0.000555036	-0.0473499	-0.0725088	0.0725088	0.544943	0.296989	0.403431	0.258093	0.991876	0.384808	0.182909	0.182909	grey
PTS	-0.10307	0.119869	-0.0123654	-0.0324079	-0.097334	-0.022544	-0.129183	0.129183	0.0579905	0.0273252	0.820549	0.55208	0.0734954	0.679168	0.0173261	0.0173261	blue
ABCF2	-0.0381658	0.058174	0.113348	-0.00761482	0.0518101	0.0658878	-0.164639	0.164639	0.483699	0.2855	0.036981	0.888907	0.341584	0.226295	0.00235869	0.00235869	blue
SLC39A10	0.064227	0.045395	0.139448	0.10922	-0.00975732	0.131898	0.0193412	-0.0193412	0.238241	0.404759	0.0101522	0.0444801	0.857944	0.0150925	0.722719	0.722719	turquoise
HIST1H3I	-0.0432	0.0450161	-0.137172	-0.0876323	-0.0100104	-0.0324291	-0.0539603	0.0539603	0.427877	0.408695	0.0114636	0.107262	0.8543	0.55182	0.321897	0.321897	grey
TREML1	0.0193253	-0.0899676	0.059064	0.0467329	0.00600313	0.0222345	0.200045	-0.200045	0.722937	0.0981853	0.278181	0.391039	0.912313	0.683333	0.000209598	0.000209598	green
RAC2	-0.0724446	-0.0432101	0.0374286	0.00797084	-0.000677544	0.0615962	0.0532911	-0.0532911	0.183298	0.42777	0.492191	0.883749	0.990083	0.258059	0.327944	0.327944	red
SRFBP1	-0.0502425	-0.000145257	0.218722	0.107675	0.0472311	0.151244	-0.0388275	0.0388275	0.356409	0.997874	4.87573e-05	0.0475973	0.386003	0.00526302	0.476144	0.476144	turquoise
CFL2	-0.0426153	-0.161015	0.0958408	0.0214916	0.0050126	-0.0658436	0.334173	-0.334173	0.434162	0.00294835	0.0780427	0.69337	0.926737	0.226607	2.74667e-10	2.74667e-10	brown
TNFAIP3	0.0533414	0.0755645	0.125343	-0.0136006	0.00193981	0.0148092	0.142162	-0.142162	0.327487	0.165096	0.0209775	0.802974	0.971614	0.785872	0.00876384	0.00876384	green
NRIP3	-0.081328	-0.071214	0.0661454	-0.0414652	-0.00374862	0.00798532	0.157469	-0.157469	0.135084	0.190871	0.224481	0.44668	0.945177	0.883539	0.00365204	0.00365204	grey
PLEKHM3	0.0341727	-0.0802998	0.0711858	0.00372805	0.0119986	0.0361775	0.0793802	-0.0793802	0.53063	0.140105	0.191047	0.945477	0.825786	0.506782	0.144717	0.144717	black
ARMH1	-0.0371564	-0.0238552	0.0723594	0.00598282	0.0836119	-0.0460527	0.0907498	-0.0907498	0.495347	0.661632	0.183815	0.912608	0.124425	0.397979	0.0952852	0.0952852	green
PBK	-0.112262	0.107915	-0.00824025	-0.0628638	-0.0635001	-0.0586036	-0.315539	0.315539	0.0388423	0.0471017	0.879849	0.248372	0.243607	0.281951	2.83839e-09	2.83839e-09	blue
ZFHX3	0.0975522	-0.132762	0.156674	0.0562685	-0.00162147	0.0497553	0.260694	-0.260694	0.0728495	0.0144368	0.00382911	0.301601	0.976271	0.361098	1.13556e-06	1.13556e-06	brown
DACT1	-0.0189112	-0.148445	0.139317	0.00416634	0.00200722	0.0234396	0.537751	-0.537751	0.728638	0.00617675	0.0102243	0.939079	0.970628	0.667171	8.43462e-27	8.43462e-27	yellow
CIZ1	-0.0158038	-0.0117607	0.00554755	-0.0558707	-0.0114813	0.0367717	-0.0222698	0.0222698	0.771875	0.829186	0.918943	0.305038	0.833184	0.499825	0.682857	0.682857	darkgreen
ECE1	-0.028311	-0.0263812	0.0195543	0.0245255	0.0237126	0.0797131	0.167124	-0.167124	0.603454	0.628372	0.719791	0.652737	0.663531	0.143034	0.0020188	0.0020188	grey
PGM3	0.0195987	0.160848	0.096639	0.0907382	-0.0500075	0.0471637	-0.209626	0.209626	0.719183	0.00297849	0.0755845	0.0953278	0.358666	0.386682	0.0001008	0.0001008	turquoise
NSMCE1	0.0270686	-0.0314016	0.0588322	0.0430237	0.161917	0.02252	0.118879	-0.118879	0.619446	0.564499	0.280075	0.429767	0.00279029	0.679491	0.0286345	0.0286345	grey
EYA2	0.137139	-0.070627	-0.0993618	-0.0672287	-0.0712495	-0.106922	-0.123571	0.123571	0.0114839	0.194563	0.0676679	0.216966	0.190649	0.049182	0.0228751	0.0228751	grey
SLC30A7	0.0663011	0.100055	0.169889	0.107274	0.0078864	0.13392	-0.168413	0.168413	0.22339	0.0657656	0.00169363	0.048435	0.884971	0.0135965	0.00186067	0.00186067	turquoise
SLC36A1	0.087625	-0.00521689	0.116531	0.0582551	-0.0271484	0.0755682	0.154913	-0.154913	0.107291	0.92376	0.0319562	0.284828	0.618413	0.165075	0.00424983	0.00424983	turquoise
PRPF19	-0.0174375	0.0207586	0.0211314	-0.0215148	0.0705696	0.0619779	-0.0951821	0.0951821	0.749046	0.703325	0.698256	0.693055	0.194927	0.255115	0.0801199	0.0801199	blue
FMO5	0.132275	-0.0505346	-0.059254	-0.0150498	0.000782224	-0.0081253	-0.279497	0.279497	0.0148031	0.353616	0.276635	0.78248	0.988551	0.881512	1.67959e-07	1.67959e-07	grey
MARVELD3	0.0622562	0.160979	0.0631253	-0.0300478	0.103512	0.0143944	-0.254448	0.254448	0.252984	0.00295482	0.246406	0.581415	0.0569195	0.791731	2.07568e-06	2.07568e-06	blue
C2orf76	-0.0139216	-0.13526	-0.0685207	-0.0779446	0.00211053	-0.0763028	0.0965659	-0.0965659	0.798422	0.0126789	0.20824	0.152146	0.969117	0.160993	0.0758068	0.0758068	grey
FOXL1	0.0667172	-0.00563471	0.00338672	0.0823456	0.0820888	0.0641903	0.0549653	-0.0549653	0.220491	0.917674	0.950463	0.130251	0.131457	0.23851	0.312954	0.312954	purple
M1AP	-0.0411737	0.0761691	-0.105493	-0.0447796	-0.0485813	-0.0775288	-0.0538684	0.0538684	0.449884	0.16173	0.0523096	0.411164	0.372555	0.154352	0.322723	0.322723	grey
ECM1	0.0522594	-0.00598235	-0.160998	-0.0855705	-0.0188439	-0.109519	0.0299513	-0.0299513	0.337408	0.912615	0.00295134	0.115815	0.729566	0.0438962	0.582629	0.582629	pink
TUBA1C	-0.161726	0.044041	-0.0376266	0.0081152	0.000901504	0.0534337	-0.202338	0.202338	0.00282296	0.41893	0.489902	0.881658	0.986806	0.326649	0.000176457	0.000176457	blue
SCYL2	0.0134361	0.0330367	0.102897	0.0413168	0.000957053	0.0842708	-0.157245	0.157245	0.80531	0.54439	0.0584164	0.448309	0.985993	0.121474	0.00370107	0.00370107	turquoise
OARD1	0.0430338	0.117722	-0.0740902	-0.0283754	-0.0594599	-0.0736893	-0.303294	0.303294	0.429659	0.0302324	0.17352	0.60263	0.274967	0.175866	1.2095e-08	1.2095e-08	grey60
CD96	-0.0433453	-0.0151552	0.220077	0.0435139	0.0358973	0.0999292	0.167248	-0.167248	0.426324	0.780995	4.36436e-05	0.424526	0.510082	0.0661068	0.00200308	0.00200308	green
LY86	-0.0365647	-0.152402	0.120237	0.0566298	0.0403249	-0.00070262	0.329321	-0.329321	0.502243	0.00492194	0.026852	0.298503	0.459288	0.989716	5.12357e-10	5.12357e-10	green
CHRNA5	-0.0463415	0.0231768	-0.030904	-0.0174779	0.0793634	0.0665759	-0.0503767	0.0503767	0.395023	0.670682	0.570689	0.748485	0.144802	0.221472	0.355125	0.355125	blue
LARP4B	0.000968208	0.105705	0.0454603	-0.0229616	0.0414678	0.0655728	-0.278693	0.278693	0.98583	0.0518365	0.404082	0.673564	0.446651	0.228528	1.8279e-07	1.8279e-07	turquoise
SPNS1	0.062482	-0.0199296	0.0514639	0.0420761	0.131538	0.0772938	0.0464395	-0.0464395	0.251263	0.714645	0.344824	0.440005	0.0153731	0.155608	0.394023	0.394023	blue
BPGM	0.0478411	0.0251156	-0.00636315	-0.0685986	-0.0270479	-0.0838729	0.172506	-0.172506	0.379891	0.644948	0.907077	0.207722	0.619713	0.12325	0.00143076	0.00143076	grey
GPR89B	0.106478	0.0895023	0.0204549	0.0634396	0.0468277	0.000982453	-0.181087	0.181087	0.0501356	0.0999432	0.707465	0.244057	0.390078	0.985621	0.000809315	0.000809315	grey
NRN1	-0.0771028	0.0873331	0.0363367	-0.0221532	0.128277	0.0111915	0.0578027	-0.0578027	0.156635	0.108471	0.504913	0.684428	0.0181337	0.837336	0.288591	0.288591	grey
TSSK6	0.0777357	0.0114053	-0.0147418	-0.0361486	0.0918806	0.00732552	-0.14188	0.14188	0.153251	0.834272	0.786823	0.507122	0.0912144	0.893101	0.00889948	0.00889948	grey
SLC14A1	0.104896	-0.125023	0.0652349	0.0545219	-0.0188782	0.0727406	0.0951306	-0.0951306	0.053665	0.0213098	0.23094	0.316879	0.729094	0.18151	0.0802842	0.0802842	grey
RXRA	0.0653858	-0.0734033	-0.0261299	-0.0369459	-0.0436626	0.0216302	-0.00918107	0.00918107	0.22986	0.177554	0.631648	0.497794	0.422942	0.691493	0.866252	0.866252	turquoise
AKR1C1	0.0328793	-0.0649704	-0.10131	-0.00214949	-0.0250726	-0.0780883	0.0319957	-0.0319957	0.54631	0.23284	0.0624314	0.968547	0.645514	0.15139	0.557151	0.557151	grey
MMP11	0.0360216	0.0398381	0.0766745	-0.0205851	-0.02284	0.0132675	0.33706	-0.33706	0.508617	0.464732	0.158957	0.705689	0.675194	0.807703	1.88555e-10	1.88555e-10	yellow
LSM14A	-0.0310721	0.039475	0.0541319	0.0690894	0.0494475	0.0584849	-0.0456557	0.0456557	0.568595	0.468814	0.320358	0.204481	0.36408	0.282929	0.402063	0.402063	turquoise
NFASC	0.00815825	-0.167637	0.0755664	0.0349112	0.00945499	-0.0256123	0.296557	-0.296557	0.881035	0.00195444	0.165085	0.52178	0.862301	0.638421	2.61068e-08	2.61068e-08	brown
APEX2	0.0394603	0.0560674	-0.0559943	-0.0972613	0.000994636	0.00992297	-0.121174	0.121174	0.46898	0.303336	0.303967	0.0737119	0.985443	0.855558	0.0256787	0.0256787	blue
TMEM214	0.0288095	0.103941	0.00180996	0.023374	0.00379739	0.0660343	-0.0914605	0.0914605	0.59709	0.0558923	0.973514	0.668047	0.944465	0.225263	0.09271	0.09271	turquoise
HGH1	-0.0210262	0.108064	-0.0385648	-0.0304835	-0.0415131	0.0192461	-0.206358	0.206358	0.699684	0.046795	0.479136	0.575945	0.446154	0.724028	0.000129876	0.000129876	blue
RAB6D	0.000703946	0.00315757	-0.0560679	-0.00705483	0.0344136	-0.00073529	-0.0511481	0.0511481	0.989697	0.95381	0.303331	0.897029	0.527735	0.989238	0.347796	0.347796	grey
POMT1	0.046383	0.109293	-0.0333009	-0.0214839	-0.00412935	0.0133955	-0.0613161	0.0613161	0.3946	0.0443363	0.541174	0.693474	0.939619	0.805886	0.260234	0.260234	turquoise
NPNT	-0.0168402	0.0117915	0.0937736	0.0453198	0.0395415	0.035921	-0.0867598	0.0867598	0.757368	0.828747	0.0847119	0.405538	0.468065	0.509802	0.110819	0.110819	grey
TMEM164	-0.0360741	0.033802	0.0048057	0.00927583	-0.0552966	0.033106	-0.249071	0.249071	0.507998	0.5351	0.929753	0.864885	0.310042	0.543545	3.44548e-06	3.44548e-06	turquoise
TP53INP1	0.0680771	0.0620502	0.143858	0.186123	0.0143723	0.106724	0.0477126	-0.0477126	0.211207	0.25456	0.00798423	0.000572389	0.792043	0.0496056	0.381174	0.381174	turquoise
CREB3L3	-0.113657	0.0346543	-0.0562904	0.011254	0.0928364	-0.0285016	-0.138798	0.138798	0.0364656	0.524849	0.301413	0.83644	0.0878829	0.601017	0.0105126	0.0105126	grey
BMP7	0.0383696	0.0381104	-0.0910604	-0.131701	-0.00782468	-0.0197892	0.0039292	-0.0039292	0.481365	0.484334	0.0941528	0.0152457	0.885865	0.716569	0.94254	0.94254	lightcyan
ACAP1	-0.0407368	-0.0705203	0.121878	0.068224	0.0133651	0.088036	0.173554	-0.173554	0.454711	0.19524	0.0248268	0.210221	0.806318	0.105648	0.00133641	0.00133641	green
SRXN1	-0.0253787	-0.0176452	-0.00118433	-0.0532589	-0.0181616	0.0503888	-0.0426442	0.0426442	0.641487	0.74616	0.982667	0.328237	0.738996	0.355009	0.43385	0.43385	blue
ATP1B3	-0.0483146	0.0772189	0.0835345	-0.0247711	-0.0400755	-0.0391613	-0.198665	0.198665	0.375188	0.15601	0.124775	0.649491	0.462072	0.472357	0.000232266	0.000232266	blue
RBM4	0.0157282	0.0444885	0.122178	0.0658883	-0.0339197	0.0941196	0.0341608	-0.0341608	0.772937	0.414215	0.0244701	0.226292	0.533679	0.0835645	0.530773	0.530773	turquoise
ZC3H4	0.04934	-0.00467914	0.0945102	0.0529337	0.0524974	0.0863922	-0.0551538	0.0551538	0.365126	0.931598	0.0822845	0.331202	0.335209	0.112344	0.311294	0.311294	turquoise
DENND2C	0.0290969	-0.0390659	-0.166728	-0.048231	-0.0270108	-0.073207	-0.0486105	0.0486105	0.593435	0.473438	0.00206972	0.376015	0.620194	0.178719	0.372266	0.372266	pink
MOB1A	-0.0341115	0.0751018	0.215816	0.086865	-0.00839345	0.111282	-0.110388	0.110388	0.531366	0.167706	6.16986e-05	0.110385	0.877632	0.0405875	0.0422379	0.0422379	turquoise
P3H3	-0.00175621	-0.00713235	0.110955	0.0384252	-0.00412024	0.0434897	0.486528	-0.486528	0.9743	0.895904	0.0411856	0.480729	0.939752	0.424783	1.51309e-21	1.51309e-21	yellow
ZFP28	-0.0635063	-0.0859108	0.037632	0.0140023	0.0313046	-0.0311533	0.233365	-0.233365	0.24356	0.114367	0.48984	0.797279	0.565704	0.567585	1.41888e-05	1.41888e-05	brown
ANKRD61	0.144877	0.0280296	0.0661024	0.109442	0.0294793	0.0798583	-0.0921299	0.0921299	0.00754627	0.60706	0.224783	0.0440459	0.588588	0.142305	0.0903356	0.0903356	turquoise
RPS4X	-0.387856	0.0561379	0.0245576	-0.073983	-0.0514321	0.0417462	-0.0497099	0.0497099	1.2944e-13	0.302727	0.652313	0.174145	0.345122	0.443602	0.361537	0.361537	grey
TRAPPC1	-0.0787699	0.0397728	-0.0927401	-0.0155313	-0.0504768	-0.0416008	0.110659	-0.110659	0.147841	0.465464	0.0882138	0.775704	0.354169	0.445193	0.0417325	0.0417325	grey
FBLN7	-0.00628295	-0.102385	-0.00241028	0.0696386	0.00877839	0.0435262	0.364905	-0.364905	0.908243	0.0596874	0.964734	0.200897	0.872067	0.424395	4.08082e-12	4.08082e-12	yellow
EPB41L4B	0.00345072	0.0539144	-0.0318949	-0.0670579	-0.0386361	0.0263285	-0.338566	0.338566	0.949528	0.32231	0.558395	0.218138	0.478322	0.629059	1.5472e-10	1.5472e-10	turquoise
TNRC6B	0.0176294	-0.0806301	0.121525	0.0159588	0.00420046	0.0393583	0.148606	-0.148606	0.746379	0.138477	0.0252511	0.7697	0.938581	0.47013	0.00612059	0.00612059	turquoise
SP6	-0.0643649	0.0992318	-0.0179585	-0.0213304	-0.0337374	0.0598194	-0.116575	0.116575	0.237232	0.0680298	0.74181	0.695555	0.535881	0.27207	0.0318909	0.0318909	grey
COPG2	0.0572574	0.057955	-0.0426348	-0.0596596	-0.0256712	-0.0651191	-0.136769	0.136769	0.293171	0.287321	0.433953	0.273355	0.637649	0.23177	0.0117106	0.0117106	blue
VIPR1	0.117911	0.0403583	-0.00481517	0.022597	0.0138777	-0.0111924	-0.248843	0.248843	0.0299662	0.458916	0.929615	0.678456	0.799045	0.837322	3.51922e-06	3.51922e-06	grey
BRCA2	0.019349	0.113308	0.0885666	0.0642882	0.0255391	0.134599	-0.253099	0.253099	0.722612	0.0370482	0.103554	0.237793	0.639381	0.0131242	2.35956e-06	2.35956e-06	blue
P2RY12	-0.0374758	-0.0769406	0.164103	0.0695877	0.00421044	0.025616	0.19757	-0.19757	0.491644	0.157512	0.00243857	0.201227	0.938435	0.638372	0.000251872	0.000251872	green
SPTSSA	-0.00249069	0.113512	-0.0467549	-0.0486741	-0.0303292	-0.0643299	-0.0461438	0.0461438	0.963558	0.0367071	0.390816	0.371641	0.577879	0.237488	0.397045	0.397045	grey
AGO4	0.0434749	0.00397181	0.131105	0.121415	0.0230711	0.0808461	0.0861136	-0.0861136	0.424941	0.941918	0.0157175	0.0253845	0.672098	0.137419	0.113511	0.113511	turquoise
SAAL1	-0.0974442	0.119925	0.0980928	0.0503126	-0.0027233	0.082441	-0.189306	0.189306	0.0731687	0.027253	0.0712688	0.355738	0.960157	0.129804	0.000457699	0.000457699	blue
SETD7	-0.0267786	0.000445544	0.154803	0.0920066	0.104639	0.041237	0.174974	-0.174974	0.623205	0.993479	0.00427749	0.0907695	0.0542564	0.449186	0.00121773	0.00121773	brown
FPR3	-0.0116316	0.0230077	0.24314	0.100536	0.0664732	0.054477	0.23873	-0.23873	0.831033	0.672947	5.94636e-06	0.064471	0.222188	0.317279	8.84397e-06	8.84397e-06	magenta
BCS1L	-0.00995221	0.0625161	-0.0846533	-0.0342552	0.0239482	0.026497	-0.199884	0.199884	0.855137	0.251004	0.119787	0.529637	0.660395	0.626865	0.000212141	0.000212141	blue
SLBP	-0.0686686	0.104734	-0.00418579	-0.0608686	-0.0280214	-1.69243e-06	-0.188419	0.188419	0.207258	0.0540371	0.938795	0.263735	0.607166	0.999975	0.000487295	0.000487295	blue
WDR77	0.0506419	0.0182252	-0.0524617	0.0110561	-0.0102113	0.0246452	-0.231953	0.231953	0.352594	0.738115	0.335539	0.839277	0.85141	0.651155	1.60388e-05	1.60388e-05	blue
LRRC75A	0.0307449	0.126052	0.0613617	-0.0554355	-0.0267878	0.0132581	-0.140433	0.140433	0.572674	0.0202566	0.259879	0.308826	0.623085	0.807837	0.00962722	0.00962722	grey
RPA3	0.000558924	0.0240771	0.0794175	-0.000140269	-0.011292	0.069781	-0.21803	0.21803	0.99182	0.658683	0.144528	0.997947	0.835895	0.199975	5.15805e-05	5.15805e-05	blue
FKTN	0.0799257	0.0515852	0.0978793	0.0497769	0.0328465	0.0792978	-0.169333	0.169333	0.141968	0.343686	0.0718896	0.36089	0.54671	0.145136	0.00175481	0.00175481	turquoise
KCTD18	0.0175569	0.00443169	0.0832901	0.0492037	0.0257963	0.0223487	0.0483136	-0.0483136	0.747386	0.935207	0.125886	0.366454	0.63601	0.681795	0.375197	0.375197	turquoise
CARHSP1	0.0152829	0.0531699	-0.0882972	-0.0312639	0.0307504	-0.0218314	0.114279	-0.114279	0.779197	0.329047	0.104613	0.566209	0.572606	0.688772	0.0354465	0.0354465	grey
SALL1	0.111622	0.0457059	-0.016293	0.0581455	-0.0539304	0.0528159	-0.0785633	0.0785633	0.0399744	0.401546	0.765018	0.285736	0.322166	0.332281	0.14891	0.14891	grey
CA4	-0.0203611	0.125056	0.00225787	0.0373118	-0.0313943	0.0372147	-0.0846486	0.0846486	0.708745	0.0212753	0.966962	0.493543	0.564589	0.494669	0.119808	0.119808	grey
MEIS3	0.076755	-0.0469649	0.0751487	-0.0130886	-0.0159527	0.0100808	0.517275	-0.517275	0.158519	0.388689	0.16744	0.810248	0.769786	0.853287	1.35955e-24	1.35955e-24	yellow
GTPBP2	0.0793132	0.157958	-0.0228323	-0.047243	-0.0236023	-0.0162692	-0.0826356	0.0826356	0.145057	0.00354663	0.675297	0.385883	0.665001	0.765351	0.128898	0.128898	grey60
XXYLT1	0.0249037	-0.062936	0.0601245	-0.011327	-0.00819046	0.0122742	0.0866817	-0.0866817	0.64774	0.247828	0.269628	0.835394	0.880569	0.821851	0.111141	0.111141	blue
FREM2	0.0823909	-0.0622655	0.0301887	0.0114361	0.0181369	0.049223	0.0166756	-0.0166756	0.130039	0.252912	0.579643	0.833831	0.739338	0.366265	0.759668	0.759668	black
STRN4	0.0718252	0.0732115	-0.0869085	-0.0220787	0.0157136	-0.0204163	-0.0360907	0.0360907	0.187081	0.178692	0.110206	0.685434	0.773143	0.707992	0.507803	0.507803	blue
TMPRSS3	-0.0125761	0.105139	0.0447612	-0.106946	0.00423299	-0.0174803	-0.161128	0.161128	0.817545	0.0531106	0.411356	0.04913	0.938106	0.748451	0.00292813	0.00292813	grey
KLF16	-0.0980204	0.117576	-0.0501268	-0.0919367	0.0164515	-0.00546981	-0.0791159	0.0791159	0.0714787	0.0304396	0.35752	0.091016	0.762801	0.920075	0.146064	0.146064	blue
ARSE	-0.0898911	-0.00794449	0.0592211	-0.0258981	0.0199055	0.0306521	-0.0169219	0.0169219	0.0984727	0.88413	0.276903	0.634678	0.714976	0.573835	0.756229	0.756229	grey
RNASEH2B	0.0392119	-0.00656441	0.115962	0.0295851	0.00779235	0.0576985	-0.0862996	0.0862996	0.471786	0.904152	0.0328088	0.587249	0.886334	0.289463	0.112731	0.112731	black
TSPAN3	0.0159897	0.120969	-0.0131448	0.0536037	0.0503966	0.00383085	-0.196265	0.196265	0.769268	0.0259312	0.809448	0.32511	0.354935	0.943976	0.000277221	0.000277221	grey
ADNP2	-0.0416293	0.103889	0.0757073	-0.0109914	0.0112176	0.0390256	-0.107911	0.107911	0.444881	0.0560157	0.164296	0.840205	0.836961	0.473895	0.0471091	0.0471091	turquoise
NLRP1	-0.0202186	0.0218337	0.0378468	0.0298159	0.00674644	-0.0207085	0.221277	-0.221277	0.710692	0.688741	0.487364	0.584335	0.901507	0.704007	3.9539e-05	3.9539e-05	green
SLC9A7	0.0520751	0.0677887	0.167171	0.0769765	0.0871089	0.146934	-0.073352	0.073352	0.339117	0.213152	0.00201281	0.157317	0.109384	0.00672665	0.177857	0.177857	green
CEP41	0.105021	-0.0856208	0.0475847	0.0290022	0.07604	0.138188	0.112995	-0.112995	0.0533792	0.1156	0.382452	0.594638	0.162445	0.0108611	0.0375768	0.0375768	grey
PARP16	-0.0205509	-0.00994501	0.0716395	-0.0715038	0.0103641	-0.0171951	-0.0483257	0.0483257	0.706156	0.855241	0.188227	0.189067	0.849212	0.75242	0.375078	0.375078	turquoise
ZNF662	0.0523755	-0.136325	0.0899795	0.096225	0.00566136	0.108079	0.193747	-0.193747	0.336335	0.0119885	0.0981405	0.0768516	0.917286	0.0467639	0.000333054	0.000333054	brown
ZCCHC8	-0.0498273	0.0786966	0.102753	0.0243773	0.00306047	0.0814161	-0.198337	0.198337	0.360403	0.148219	0.0587722	0.6547	0.955229	0.13466	0.000237991	0.000237991	turquoise
PAWR	0.0439262	0.0440208	0.0842289	0.0266577	-0.0431199	0.0601006	-0.0963047	0.0963047	0.420146	0.419144	0.12166	0.624775	0.428736	0.269819	0.0766063	0.0766063	blue
FAM166B	-0.142016	0.0390231	0.029178	-0.110894	-0.0229316	-0.0417338	-0.0323007	0.0323007	0.00883398	0.473923	0.592406	0.0412981	0.673966	0.443737	0.553397	0.553397	grey
SLC37A3	0.0406848	0.129075	0.0343216	0.0167937	0.0444165	0.0384741	-0.159857	0.159857	0.455287	0.0174209	0.528838	0.758017	0.414971	0.48017	0.00316329	0.00316329	blue
CRTAP	-0.0251499	-0.188679	0.153653	0.0549859	0.0200503	0.0210542	0.420932	-0.420932	0.644496	0.000478459	0.00457586	0.312772	0.712993	0.699305	5.44926e-16	5.44926e-16	brown
SIRT4	-0.000136863	-0.160367	0.00341951	-0.0925479	0.0319048	-0.0486263	0.0946579	-0.0946579	0.997997	0.00306694	0.949984	0.0888779	0.558273	0.372111	0.0818048	0.0818048	grey
LRP1	0.0542809	-0.0656417	0.146118	0.116899	-0.00534851	0.0752849	0.303955	-0.303955	0.319026	0.228038	0.00704173	0.0314147	0.921842	0.166669	1.1203e-08	1.1203e-08	yellow
THUMPD1	-0.00280257	-0.00235771	0.246239	0.0860055	0.00585962	0.093836	-0.039162	0.039162	0.958999	0.965502	4.47888e-06	0.113967	0.914401	0.084504	0.47235	0.47235	turquoise
DAPL1	0.0544192	-0.141314	-0.0684585	-0.0465461	-0.027783	-0.00856416	-0.0877	0.0877	0.317793	0.00917818	0.208654	0.392938	0.610228	0.875163	0.10699	0.10699	greenyellow
SUSD1	0.100033	-0.0058967	0.023602	0.118977	0.0409528	0.0868019	-0.109687	0.109687	0.0658243	0.913861	0.665004	0.0285036	0.452321	0.110645	0.0435724	0.0435724	turquoise
DDR2	0.0133807	-0.136612	0.16839	0.103889	0.0893478	-0.0430211	0.478368	-0.478368	0.806095	0.0118083	0.00186341	0.0560155	0.100533	0.429795	8.67011e-21	8.67011e-21	brown
CFAP73	0.0423208	-0.0378741	0.042771	-0.0726762	-0.0320785	0.00997088	0.0521497	-0.0521497	0.437349	0.487049	0.432484	0.181898	0.556131	0.854869	0.338424	0.338424	grey
FUT8	-0.0195404	0.00029954	0.0481389	0.0368116	0.00663672	0.0813113	-0.168395	0.168395	0.719983	0.995616	0.376928	0.499359	0.903101	0.135164	0.00186278	0.00186278	turquoise
SLC25A5	-0.0886953	0.0934283	0.0119813	-0.0504966	-0.0383556	0.0387446	-0.28123	0.28123	0.103052	0.0858692	0.826033	0.353979	0.481525	0.477087	1.39794e-07	1.39794e-07	blue
KLK7	-0.0245604	-0.0123977	-0.0567101	-0.0197692	0.0896535	0.0397139	-0.0506368	0.0506368	0.652276	0.820088	0.297818	0.716844	0.0993692	0.466126	0.352643	0.352643	pink
PHF3	0.0357213	-0.0469901	0.0753597	0.0266342	-0.00262351	0.0561936	-0.0927836	0.0927836	0.51216	0.388434	0.166247	0.62508	0.961616	0.302247	0.0880641	0.0880641	grey60
ADAM8	0.0746678	0.067479	0.0177338	0.0516847	0.0689013	0.0664539	0.0100616	-0.0100616	0.170183	0.215255	0.744929	0.342755	0.205719	0.222322	0.853563	0.853563	purple
CYS1	-0.00450047	-0.157712	0.03696	0.0441426	-0.0330072	-0.0296788	0.322085	-0.322085	0.934204	0.00359923	0.497629	0.417857	0.54475	0.586065	1.27244e-09	1.27244e-09	brown
OSGEP	-0.0305202	0.141671	0.0929361	0.10742	0.0726214	0.163794	-0.0961794	0.0961794	0.575486	0.00900164	0.087541	0.0481284	0.182228	0.00248557	0.0769923	0.0769923	blue
KLHL9	0.026792	-0.0257227	0.146299	0.0491175	-0.0547242	0.0304677	0.0585915	-0.0585915	0.623031	0.636974	0.00697072	0.367295	0.315084	0.576143	0.282051	0.282051	turquoise
TP53TG5	0.0937997	-0.0243185	0.0495958	0.0284606	-0.0203851	0.0565206	-0.00533117	0.00533117	0.0846249	0.655479	0.362642	0.601541	0.708418	0.299437	0.922095	0.922095	grey
ENO1	-0.0588723	0.0676031	-0.099279	0.0186885	0.041572	0.0315712	-0.142898	0.142898	0.279747	0.214411	0.0678983	0.731711	0.445509	0.562397	0.0084174	0.0084174	blue
CCDC18	0.0268471	0.103898	0.0951047	0.0694408	0.0184801	0.0937648	-0.215941	0.215941	0.622316	0.055996	0.0803668	0.202183	0.73459	0.0847409	6.10806e-05	6.10806e-05	turquoise
DGKQ	0.108281	0.125913	-0.0453444	-0.0152483	0.0107066	0.0199281	-0.109808	0.109808	0.0463531	0.0203966	0.405283	0.779685	0.844291	0.714666	0.0433393	0.0433393	turquoise
LNPK	0.0146219	0.0920205	0.160492	0.0486701	-0.0206129	0.0536549	-0.166176	0.166176	0.788517	0.0907204	0.0030437	0.37168	0.70531	0.324648	0.00214278	0.00214278	turquoise
HMGCS2	-0.0429976	-0.00928717	-0.0726494	0.0771128	-0.0461427	-0.0790356	-0.0694821	0.0694821	0.430047	0.864722	0.182059	0.156581	0.397057	0.146475	0.201913	0.201913	grey
KMT2E	-0.0158469	0.00751058	0.15057	0.102972	0.0285104	0.106969	0.0357956	-0.0357956	0.771271	0.890418	0.0054712	0.0582314	0.600905	0.0490807	0.511282	0.511282	turquoise
ASAP3	-0.0554933	-0.0515535	0.000489205	0.040306	-0.00904633	0.00600432	0.127975	-0.127975	0.308321	0.343983	0.99284	0.459499	0.868197	0.912295	0.0184099	0.0184099	yellow
C6orf141	-0.00807469	0.0569629	0.0738066	0.0754725	0.0358715	0.0346349	-0.126242	0.126242	0.882245	0.295665	0.175177	0.165612	0.510386	0.525082	0.0200676	0.0200676	midnightblue
PDK1	-0.115257	0.195411	0.0877135	0.0991366	0.0696404	0.0666286	-0.154016	0.154016	0.0338923	0.000295099	0.106936	0.068296	0.200885	0.221106	0.00447989	0.00447989	turquoise
ATP8B2	-0.0129166	-0.153847	0.182598	0.0920512	0.0557213	0.0830559	0.500546	-0.500546	0.812695	0.00452438	0.000730121	0.0906124	0.306335	0.126957	6.74758e-23	6.74758e-23	yellow
FBXL22	-0.0672698	-0.148759	0.0741648	0.00121007	0.00902175	-0.0599523	0.349081	-0.349081	0.216684	0.00606748	0.173087	0.98229	0.868552	0.271005	3.77363e-11	3.77363e-11	brown
KLF4	0.00557863	0.043895	-0.120634	-0.00131707	-0.034453	-0.100261	-0.190737	0.190737	0.918491	0.420476	0.0263492	0.980725	0.527261	0.0652074	0.000413448	0.000413448	grey
KIAA1614	0.0272673	-0.141936	0.0495269	0.0382085	0.00787075	-0.0200344	0.357346	-0.357346	0.616876	0.00887255	0.363309	0.483209	0.885198	0.713211	1.19915e-11	1.19915e-11	brown
KCNA5	-0.023293	-0.0849406	0.0617657	0.048958	0.0269362	0.00931841	0.229951	-0.229951	0.669128	0.118531	0.256749	0.368854	0.621161	0.864271	1.90591e-05	1.90591e-05	brown
MOCOS	-0.0299621	0.1366	0.138417	0.0446499	-0.0210136	0.0630746	-0.245826	0.245826	0.582493	0.0118159	0.0107288	0.412522	0.699855	0.246787	4.65215e-06	4.65215e-06	grey
CHMP1A	-0.00555139	0.0948462	0.0025235	-0.0102641	0.0702395	-0.0290595	-0.112745	0.112745	0.918887	0.0811962	0.963078	0.85065	0.197029	0.59391	0.0380044	0.0380044	blue
HTR1D	0.0331355	0.0551876	0.0611773	-0.0801513	0.030717	0.00061788	-0.0444507	0.0444507	0.543186	0.310997	0.261317	0.140842	0.573024	0.990957	0.414612	0.414612	grey
LTK	0.0193725	0.110313	0.0541267	0.0213492	-0.0573934	0.0363235	-0.186342	0.186342	0.722289	0.0423792	0.320405	0.6953	0.292025	0.505068	0.000563699	0.000563699	grey
GANAB	0.0430794	0.0729607	-0.0120394	0.0217795	0.0568885	0.039874	-0.0742232	0.0742232	0.42917	0.180189	0.825203	0.689474	0.296297	0.464328	0.172748	0.172748	blue
PPP1R12A	-0.0126017	-0.127736	0.211197	0.0694143	0.0254828	0.0352769	0.269535	-0.269535	0.817179	0.0186313	8.91099e-05	0.202355	0.640121	0.517425	4.70722e-07	4.70722e-07	brown
MORC2	0.00476733	0.0844184	0.0596079	-0.00518001	0.0550659	0.0947249	-0.0608632	0.0608632	0.930312	0.120821	0.273772	0.924297	0.312068	0.0815879	0.263778	0.263778	turquoise
CLMP	-0.0128844	-0.154617	0.125974	0.0544989	0.027119	-0.0731649	0.426741	-0.426741	0.813153	0.00432442	0.0203346	0.317084	0.618793	0.178969	1.9559e-16	1.9559e-16	brown
TREM1	0.0355089	0.0933947	-0.0594237	-0.0056884	-0.0423561	-0.0686552	0.171604	-0.171604	0.514673	0.0859824	0.27526	0.916893	0.436966	0.207346	0.00151674	0.00151674	darkorange
ARNTL	0.0918748	0.0218077	0.106932	0.0613742	0.0348334	0.0594052	0.0198165	-0.0198165	0.0912346	0.689093	0.0491597	0.259782	0.522708	0.27541	0.716195	0.716195	turquoise
DGKE	-0.0464978	0.0476904	0.15443	0.0451893	0.0588418	0.0404446	-4.58372e-05	4.58372e-05	0.393429	0.381396	0.00437234	0.406893	0.279997	0.457956	0.999329	0.999329	turquoise
EPHA7	-0.0245249	-0.105751	0.0410687	-0.0180694	0.0290081	-0.0752302	0.185063	-0.185063	0.652746	0.0517329	0.451042	0.740273	0.594563	0.166978	0.000616134	0.000616134	brown
SRRM2	0.0493222	0.0115514	0.109083	0.0808798	0.0318331	0.121314	-0.0487686	0.0487686	0.365298	0.83218	0.0447487	0.137255	0.559158	0.0255067	0.370711	0.370711	turquoise
SENP1	0.0017389	0.00395128	0.096559	0.0533776	0.031514	0.138055	-0.0561429	0.0561429	0.974553	0.942218	0.0758278	0.327158	0.563105	0.0109382	0.302683	0.302683	turquoise
RAD18	-0.0756362	0.106587	0.079803	0.0184887	0.0438856	0.105116	-0.255961	0.255961	0.164694	0.0498996	0.142583	0.734471	0.420576	0.0531613	1.79601e-06	1.79601e-06	turquoise
LGALS8	0.0659099	0.0508612	0.0905462	0.0515336	0.0102999	0.0703853	-0.0540045	0.0540045	0.226139	0.35051	0.0960336	0.34417	0.850135	0.196098	0.321501	0.321501	turquoise
IFITM1	-0.121205	0.0979366	0.141508	-0.0393386	0.0873146	0.0801945	-0.0179415	0.0179415	0.0256408	0.0717227	0.00908182	0.470353	0.108547	0.140628	0.742046	0.742046	grey
GLT8D2	0.00794884	-0.134819	0.163249	0.0940016	-0.0171058	-0.00714098	0.660028	-0.660028	0.884067	0.0129749	0.00257084	0.0839544	0.753665	0.895779	8.99955e-44	8.99955e-44	yellow
IRF2BPL	0.0562307	-0.102106	0.0548325	-0.0161005	0.0152155	0.00461099	0.321345	-0.321345	0.301927	0.0603896	0.314127	0.767714	0.780146	0.932592	1.39453e-09	1.39453e-09	brown
TMEM182	0.0353797	0.119712	0.0192058	0.0165991	-0.0317979	-0.0572038	-0.219884	0.219884	0.516205	0.0275298	0.724582	0.760736	0.559593	0.293625	4.43366e-05	4.43366e-05	blue
PC	-0.0459147	0.00293355	-0.0207775	0.101514	0.0319718	0.0995863	-0.149052	0.149052	0.399395	0.957084	0.703068	0.0619014	0.557446	0.0670468	0.00596707	0.00596707	turquoise
MRFAP1L1	0.0563267	0.0112132	0.0377753	0.0231893	-0.0370813	0.0215774	-0.0415653	0.0415653	0.301101	0.837024	0.488187	0.670515	0.496218	0.692207	0.445582	0.445582	turquoise
DCAF13	-0.0185518	0.155805	0.0240327	0.0333144	0.0150067	0.0694686	-0.237295	0.237295	0.733599	0.00403173	0.659272	0.541009	0.783088	0.202001	1.00465e-05	1.00465e-05	blue
FKBP10	0.0666622	-0.0165462	0.0145072	0.130669	-0.0272449	0.107397	0.0235581	-0.0235581	0.220873	0.761476	0.790137	0.0160702	0.617165	0.0481769	0.66559	0.66559	salmon
NEMP1	-0.0295637	0.0284857	0.104394	0.0118829	-0.00402183	0.101624	-0.0881438	0.0881438	0.587519	0.60122	0.054827	0.827439	0.941188	0.0616201	0.10522	0.10522	blue
CAMKK1	-0.0617575	0.0972469	0.0533101	-0.061288	0.00937059	0.0198774	-0.0341407	0.0341407	0.256812	0.0737547	0.327771	0.260453	0.863518	0.715361	0.531015	0.531015	turquoise
BTF3L4	0.0403215	-0.0418956	0.112719	0.0518923	-0.0487623	0.0420744	0.0667849	-0.0667849	0.459327	0.441971	0.0380484	0.340818	0.370773	0.440024	0.220022	0.220022	turquoise
C1QTNF4	0.0378829	-0.215078	0.0612217	-0.0203101	0.0103003	-0.0292613	0.35207	-0.35207	0.486947	6.54654e-05	0.260969	0.709442	0.85013	0.591348	2.5026e-11	2.5026e-11	brown
NAALADL2	0.161083	-0.119857	0.12378	0.101003	0.030441	0.0699772	-0.0605903	0.0605903	0.00293612	0.0273414	0.0226443	0.0632331	0.576478	0.198711	0.265929	0.265929	greenyellow
SMAP1	-0.0277894	-0.100939	0.0591363	0.0980684	0.0144843	0.112699	-0.0311432	0.0311432	0.610146	0.0634016	0.277592	0.0713395	0.790459	0.0380827	0.567709	0.567709	grey
SLC22A15	0.0578875	0.0147251	0.0265885	0.00162281	-0.0835114	0.066336	-0.00869115	0.00869115	0.287884	0.787059	0.625674	0.976251	0.124879	0.223146	0.873328	0.873328	turquoise
PROC	-0.0132688	0.0211738	-0.021501	-0.0160102	-0.063677	-0.0704267	-0.0559436	0.0559436	0.807685	0.69768	0.693242	0.768981	0.242293	0.195835	0.304406	0.304406	grey
RRP9	-0.0836126	0.0792988	-0.00764786	-0.0794937	-0.0139245	0.0124453	-0.205515	0.205515	0.124422	0.145131	0.888428	0.144142	0.798381	0.819409	0.000138571	0.000138571	blue
CBX1	-0.0332797	-0.00156177	-0.00902548	-0.0448542	-0.000903502	-0.0214262	0.0962382	-0.0962382	0.541431	0.977144	0.868498	0.410384	0.986777	0.694256	0.0768109	0.0768109	blue
PLOD3	0.051133	0.0575757	0.0569439	0.0224491	0.0384089	0.015106	-0.079618	0.079618	0.347939	0.290492	0.295827	0.680444	0.480916	0.781688	0.143514	0.143514	royalblue
GALM	0.0289322	0.0818187	-0.00107178	-0.0167966	-0.000408448	-0.0325019	-0.269799	0.269799	0.595529	0.132736	0.984314	0.757977	0.994022	0.550927	4.58302e-07	4.58302e-07	grey
ILF3	0.0361876	0.0168507	0.0535501	-0.0318172	0.0225309	0.0463952	-0.176255	0.176255	0.506664	0.757223	0.325595	0.559354	0.679344	0.394475	0.00111901	0.00111901	black
PLAGL2	0.0112776	0.0523928	0.0487966	0.0226898	-0.0509216	0.0548352	-0.149655	0.149655	0.836102	0.336175	0.370437	0.677209	0.349938	0.314102	0.00576546	0.00576546	turquoise
CAMKK2	0.0614	-0.0226292	0.110558	0.0407892	0.0642997	0.0712934	0.0784523	-0.0784523	0.259581	0.678023	0.041921	0.454131	0.237709	0.190375	0.149486	0.149486	turquoise
INPP4A	0.048473	-0.0386728	0.179506	0.116044	0.0317155	0.125918	0.169504	-0.169504	0.373622	0.477905	0.000900667	0.032685	0.560611	0.0203915	0.00173582	0.00173582	turquoise
DNAJC28	0.0435601	-0.0249042	-0.0134031	-0.0919746	0.0172401	-0.0719727	-0.0697554	0.0697554	0.424034	0.647735	0.805777	0.0908822	0.751793	0.186175	0.200141	0.200141	turquoise
SMAD6	0.096945	0.028711	-0.0208028	0.000329344	0.00774272	0.0872077	-0.0891521	0.0891521	0.0746589	0.598345	0.702724	0.99518	0.887053	0.108981	0.101283	0.101283	grey
ASIC1	-0.0138676	-0.0473977	0.0750761	-0.0741055	0.0136014	0.0514497	-0.0179983	0.0179983	0.799187	0.384328	0.167852	0.173431	0.802963	0.344957	0.741259	0.741259	grey
CCDC51	-0.119216	0.0839215	0.0669369	-0.0394865	-0.0297914	0.0507005	-0.219207	0.219207	0.0281831	0.123032	0.218972	0.468685	0.584645	0.352036	4.68658e-05	4.68658e-05	blue
RRAGD	0.00412279	-0.031319	0.00381891	-0.0688078	-0.0079617	-0.00810439	0.105286	-0.105286	0.939715	0.565524	0.944151	0.206336	0.883881	0.881815	0.0527766	0.0527766	grey
MIGA2	0.0926984	0.0947945	-0.0478346	-0.0132799	-0.0115375	0.0468439	-0.219889	0.219889	0.0883577	0.081363	0.379955	0.807528	0.83238	0.389914	4.43203e-05	4.43203e-05	turquoise
FABP5	-0.0486577	-0.00779093	-0.126519	-0.055219	-0.0443736	-0.0437725	-0.186768	0.186768	0.371802	0.886354	0.0197938	0.310722	0.415423	0.421775	0.000547185	0.000547185	pink
S100A6	-0.093621	0.118622	0.0245909	-0.011065	-0.0341338	-0.00779854	-0.0400757	0.0400757	0.0852216	0.028983	0.651872	0.839149	0.531098	0.886244	0.462071	0.462071	grey
TNNI1	0.0117662	-0.0458495	-0.0350384	0.0428031	0.0179532	0.0714865	-0.239986	0.239986	0.829108	0.400066	0.520264	0.432138	0.741885	0.189174	7.90456e-06	7.90456e-06	turquoise
LIPE	-0.178304	-0.0151663	0.0309859	0.0698641	-0.00673052	0.0595346	0.11032	-0.11032	0.000976318	0.780839	0.569668	0.199439	0.901738	0.274364	0.0423666	0.0423666	grey
RAB19	0.0477877	0.0527505	0.0669607	-0.0361162	0.129005	0.0796375	-0.152492	0.152492	0.380423	0.332881	0.218808	0.507503	0.0174829	0.143415	0.00489631	0.00489631	turquoise
TWF1	-0.0243741	0.0335028	0.109912	0.00645284	-0.0348211	0.0814491	-0.275669	0.275669	0.654743	0.538722	0.0431399	0.905773	0.522855	0.134501	2.5076e-07	2.5076e-07	blue
C8orf88	-0.0678935	-0.151359	0.0757815	-0.00552395	-0.00953732	-0.03482	0.351479	-0.351479	0.212444	0.00522823	0.163882	0.919287	0.861114	0.522868	2.71531e-11	2.71531e-11	brown
PCGF5	-0.0277876	-0.0141905	0.172117	-0.0174865	-0.0548468	0.0544772	-0.0787264	0.0787264	0.610169	0.794615	0.00146729	0.748366	0.314	0.317277	0.148066	0.148066	turquoise
ATP10A	-0.00678486	-0.110596	0.129548	-0.0615621	0.00404301	0.0528136	0.406145	-0.406145	0.900949	0.0418493	0.0170105	0.258323	0.940879	0.332303	6.77788e-15	6.77788e-15	yellow
S100G	-0.0474657	-0.0830574	0.0154744	-0.0569709	-0.0249829	-0.0228694	-0.0600796	0.0600796	0.383645	0.12695	0.776504	0.295598	0.646696	0.6748	0.269987	0.269987	grey
TMPRSS4	0.057549	0.0812729	0.00606854	0.0393631	-0.0522535	0.0569461	-0.205434	0.205434	0.290717	0.135349	0.911361	0.470076	0.337463	0.295809	0.000139426	0.000139426	grey
IDNK	0.0607511	0.0171699	0.00363311	-0.0443376	0.111882	-0.085727	-0.0796018	0.0796018	0.26466	0.752771	0.946864	0.415802	0.0395115	0.115147	0.143595	0.143595	grey
COL8A2	-0.0506024	-0.129406	0.145306	0.0295508	0.00840209	0.0514081	0.614074	-0.614074	0.35297	0.0171331	0.00736825	0.587683	0.877507	0.345348	1.6163e-36	1.6163e-36	yellow
PTPRM	0.0484524	-0.0638091	0.162523	0.146091	0.0619818	0.0796051	0.411914	-0.411914	0.373825	0.241315	0.0026883	0.00705247	0.255085	0.143579	2.57303e-15	2.57303e-15	yellow
EMD	-0.0097736	-0.00584801	-0.0611452	-0.0852195	0.0324833	-0.062769	0.0405625	-0.0405625	0.857709	0.91457	0.261567	0.117322	0.551156	0.249087	0.456645	0.456645	grey
MRPS16	-0.0742436	0.0234	0.0131757	0.00744811	-0.0862208	0.0910731	-0.0875227	0.0875227	0.172629	0.6677	0.809009	0.891324	0.113061	0.0941068	0.107704	0.107704	grey
RDH12	0.0450265	-0.156833	-0.10749	-0.0389063	-0.0223577	-0.0440009	-0.0929705	0.0929705	0.408587	0.00379305	0.0479835	0.475248	0.681674	0.419355	0.0874234	0.0874234	pink
SMIM10L1	-0.128577	-0.0427577	0.0940928	0.0381258	-0.0543177	0.0215198	0.0951614	-0.0951614	0.0178625	0.432627	0.0836528	0.484157	0.318698	0.692988	0.0801859	0.0801859	cyan
S100A3	-0.020696	0.0480986	-0.067119	-0.0142722	-0.00154966	-0.0195561	0.0934394	-0.0934394	0.704177	0.377329	0.217718	0.793459	0.977322	0.719767	0.0858317	0.0858317	lightcyan
TBX1	-0.0667495	0.0805194	-0.0520592	-0.120832	-0.0027888	-0.0713657	-0.0331326	0.0331326	0.220268	0.139021	0.339265	0.0261022	0.9592	0.189925	0.543221	0.543221	grey
KATNA1	-0.0877749	0.0747545	0.0967356	0.00942983	0.0337084	0.0118768	-0.127494	0.127494	0.106689	0.169685	0.0752911	0.862664	0.536232	0.827526	0.0188578	0.0188578	blue
PPFIBP2	0.0424657	0.027867	-0.0081281	0.00664924	0.0191287	0.058572	-0.19038	0.19038	0.435779	0.609148	0.881472	0.902919	0.725642	0.282211	0.000424117	0.000424117	grey
F11R	0.125179	0.0602696	-0.0401825	0.0118423	0.00664515	-0.00682805	-0.281344	0.281344	0.0211468	0.268472	0.460877	0.82802	0.902979	0.900322	1.38116e-07	1.38116e-07	turquoise
TJP2	0.0364168	0.0726533	0.0548313	0.0449534	0.048291	0.0752415	-0.27768	0.27768	0.503975	0.182036	0.314137	0.409349	0.375421	0.166915	2.033e-07	2.033e-07	turquoise
ABCG2	0.0475137	-0.0021932	-0.00306352	0.0588284	0.0342662	0.0383585	-0.0821575	0.0821575	0.383164	0.967908	0.955185	0.280106	0.529505	0.481492	0.131134	0.131134	grey
NPR3	-0.049816	-0.0843978	0.0240048	0.0586405	0.0140617	0.0452517	0.262662	-0.262662	0.360512	0.120912	0.659643	0.281648	0.796438	0.406245	9.36001e-07	9.36001e-07	lightyellow
SLC7A1	0.0200625	0.0464851	-0.0332609	-0.00249636	-0.0185989	0.0740832	-0.215128	0.215128	0.712826	0.393558	0.54166	0.963475	0.732948	0.173562	6.52032e-05	6.52032e-05	blue
DLGAP5	-0.0871521	0.0536464	0.0617665	0.0542525	-0.0509644	0.14639	-0.313546	0.313546	0.109208	0.324725	0.256742	0.31928	0.349533	0.00693551	3.61008e-09	3.61008e-09	blue
NUP210	0.0160714	-0.0471117	0.0214897	0.0592931	0.065286	0.14489	-0.0253336	0.0253336	0.768122	0.387206	0.693396	0.276318	0.230573	0.00754094	0.642079	0.642079	turquoise
TYSND1	0.00639256	0.0817429	-0.042603	-0.0622394	-0.0024819	-0.0129224	-0.126743	0.126743	0.906649	0.133097	0.434295	0.253111	0.963686	0.812612	0.0195756	0.0195756	blue
MOB3A	-0.0862531	-0.041443	0.0440289	-0.00353793	0.00555183	0.0422241	0.107206	-0.107206	0.112926	0.446923	0.419058	0.948254	0.918881	0.438397	0.0485795	0.0485795	red
MTX3	0.0227408	0.00909927	0.138663	0.152732	0.0215141	0.144302	0.163645	-0.163645	0.676525	0.867433	0.010589	0.00482835	0.693065	0.00779079	0.00250871	0.00250871	turquoise
SHROOM2	0.0315422	-0.0507982	-0.0432739	-0.0191489	0.0238767	0.0116585	-0.0274487	0.0274487	0.562757	0.351108	0.427087	0.725364	0.661346	0.830648	0.614534	0.614534	turquoise
IFITM2	-0.0589474	0.0016224	0.0607533	-0.0337439	0.075214	0.00446728	0.279885	-0.279885	0.279133	0.976258	0.264642	0.535802	0.16707	0.934688	1.6121e-07	1.6121e-07	grey
TRIQK	0.0453323	0.141473	0.0642552	0.107163	-0.00233529	0.0020195	-0.145863	0.145863	0.405408	0.00909934	0.238034	0.0486698	0.96583	0.970449	0.00714291	0.00714291	turquoise
PSTPIP1	0.0234322	0.00246318	0.152973	0.0644848	0.000768941	0.0424696	0.240381	-0.240381	0.66727	0.96396	0.00476123	0.236358	0.988746	0.435737	7.62918e-06	7.62918e-06	green
SIRT1	0.016255	-0.0522555	0.176331	0.10482	0.00883418	0.143985	0.0135312	-0.0135312	0.76555	0.337444	0.00111337	0.0538396	0.871261	0.00792857	0.803959	0.803959	turquoise
FUT4	-0.0155521	0.0488849	0.0670495	0.0405988	1.54832e-05	0.0501515	-0.18646	0.18646	0.775412	0.36957	0.218196	0.456241	0.999773	0.357283	0.000559079	0.000559079	turquoise
RCC1	-0.0891947	0.0731814	0.0538906	-0.0170626	-0.0224906	0.0606478	-0.263687	0.263687	0.101119	0.178871	0.322524	0.754267	0.679886	0.265474	8.45782e-07	8.45782e-07	blue
RNF125	-0.0272315	-0.0147665	0.189199	0.045912	0.00085709	0.054558	0.0740868	-0.0740868	0.617338	0.786475	0.000461185	0.399423	0.987456	0.316558	0.173541	0.173541	grey
ZKSCAN3	-0.0567844	0.0310448	0.0982275	0.0632305	0.040788	0.0593534	0.0331947	-0.0331947	0.297184	0.568934	0.0708792	0.245618	0.454143	0.275829	0.542465	0.542465	turquoise
PLEKHO2	0.0180285	-0.0647552	0.21284	0.110682	0.0348652	0.0815056	0.413737	-0.413737	0.74084	0.234395	7.82581e-05	0.0416889	0.522329	0.13423	1.88693e-15	1.88693e-15	magenta
ATP6V0D1	0.0526072	0.0140797	-0.0278463	-0.0201755	0.0291657	-0.00652162	-0.0290325	0.0290325	0.334198	0.796183	0.609414	0.711281	0.592562	0.904773	0.594253	0.594253	grey
PON3	-0.0831771	-0.0208229	0.0451268	0.0158295	-0.00803258	0.0600491	-0.0699576	0.0699576	0.126402	0.70245	0.407542	0.771515	0.882855	0.27023	0.198837	0.198837	grey
C9orf152	0.122859	0.0447188	-0.0552694	-0.0967699	-0.000278438	-0.0424443	-0.24782	0.24782	0.0236786	0.411801	0.31028	0.0751874	0.995925	0.436011	3.87017e-06	3.87017e-06	grey
ODF2L	0.000445896	0.106095	0.0961602	0.0985534	0.0511986	0.0783461	0.0795969	-0.0795969	0.993474	0.0509713	0.0770515	0.0699442	0.34732	0.15004	0.14362	0.14362	turquoise
LANCL2	0.0383669	0.0217116	0.0523838	-0.0420444	0.0492039	0.0384726	0.0651906	-0.0651906	0.481396	0.690392	0.336258	0.44035	0.366451	0.480188	0.231257	0.231257	grey
SEPTIN6	-0.110699	-0.0553525	0.0625271	0.00288134	0.013545	0.0384399	0.0816657	-0.0816657	0.0416572	0.309552	0.25092	0.957847	0.803762	0.480562	0.133465	0.133465	red
LPIN2	-0.0246029	-0.00850553	-0.0155572	0.0758285	-0.0141608	0.0492535	-0.176137	0.176137	0.651714	0.876011	0.775339	0.16362	0.795035	0.365968	0.00112776	0.00112776	turquoise
LPAR2	0.0957592	0.0617532	-0.109965	-0.146947	0.0265453	-0.0755737	-0.194409	0.194409	0.0782978	0.256845	0.0430389	0.00672175	0.626236	0.165044	0.000317423	0.000317423	grey
PTPN18	-0.0032274	0.0682579	-0.037876	-0.0338881	0.051671	-0.0399452	-0.101912	0.101912	0.95279	0.209994	0.487027	0.53406	0.342883	0.463531	0.0608827	0.0608827	grey
TEFM	0.00256275	0.106946	0.0933781	0.0372809	0.0782352	0.0545218	-0.215737	0.215737	0.962504	0.049131	0.0860385	0.493901	0.150619	0.31688	6.20887e-05	6.20887e-05	turquoise
PPFIA3	-0.0102858	0.181859	-0.119724	-0.144835	0.0536379	-0.0911209	-0.137684	0.137684	0.850339	0.0007679	0.0275142	0.00756379	0.324801	0.0939335	0.0111561	0.0111561	grey
ESYT1	-0.0491886	-0.001687	0.0960196	0.049395	0.0561276	0.0346304	0.114272	-0.114272	0.366601	0.975312	0.0774864	0.36459	0.302816	0.525136	0.0354582	0.0354582	turquoise
TFEC	0.00923432	0.0439441	0.294232	0.136118	0.00272786	0.101461	0.0932837	-0.0932837	0.865484	0.419956	3.38922e-08	0.0121201	0.960091	0.0620402	0.0863575	0.0863575	magenta
PIK3R3	0.0580379	-0.0491452	0.126684	0.0587769	0.0123506	0.0660028	-0.0489391	0.0489391	0.286631	0.367024	0.0196331	0.280528	0.82076	0.225484	0.369039	0.369039	turquoise
TCF7L1	-0.0641851	-0.11793	0.0557409	0.0341001	-0.00892035	-0.0175551	0.279286	-0.279286	0.238548	0.0299401	0.306165	0.531504	0.870016	0.747411	1.71725e-07	1.71725e-07	brown
MS4A4E	0.0282711	-0.117117	0.0775833	0.0690112	0.0024379	0.00151716	0.322377	-0.322377	0.603965	0.0310989	0.154061	0.204995	0.96433	0.977797	1.2271e-09	1.2271e-09	brown
FHIT	-0.0633552	0.0174987	0.0670669	0.0237317	0.0942867	0.0222025	-0.133406	0.133406	0.244686	0.748195	0.218077	0.663276	0.0830149	0.683764	0.0139641	0.0139641	grey
VCAM1	0.00480406	-0.00411686	0.201547	0.0885799	0.0503894	0.0755649	0.292233	-0.292233	0.929777	0.939801	0.000187284	0.103502	0.355003	0.165093	4.23406e-08	4.23406e-08	magenta
RAB3GAP2	0.0281159	-0.0569745	0.126605	0.0607916	0.036581	0.11165	-0.134982	0.134982	0.605953	0.295567	0.0197094	0.26434	0.502052	0.0399248	0.0128644	0.0128644	turquoise
TMEM273	-0.0330669	-0.0871031	0.170384	0.0863023	0.00777174	0.0533759	0.348428	-0.348428	0.544021	0.109408	0.00164075	0.11272	0.886633	0.327173	4.12581e-11	4.12581e-11	green
GAD1	0.0372479	-0.0337226	-0.0170628	-0.0705641	-0.0397907	-0.00955907	-0.0680077	0.0680077	0.494284	0.536061	0.754264	0.194961	0.465264	0.860801	0.211674	0.211674	greenyellow
TCTA	-0.0386729	-0.00541884	-0.0350569	-0.0127488	0.0132099	-0.0517338	-0.0478324	0.0478324	0.477903	0.920818	0.520043	0.815084	0.808523	0.342296	0.379978	0.379978	grey
CTSC	-0.00975978	0.000134762	0.180614	0.108914	0.0299019	0.0378338	-0.0428312	0.0428312	0.857909	0.998028	0.000835706	0.0450827	0.583252	0.487513	0.431836	0.431836	magenta
GP2	0.114878	-0.008316	-0.0105836	-0.0106827	-0.0233206	-0.00062506	-0.0871072	0.0871072	0.0344882	0.878752	0.846059	0.844635	0.66876	0.990852	0.109392	0.109392	grey
CASS4	0.0306655	0.0149335	0.124186	0.0135098	0.000302041	-0.0146272	0.21559	-0.21559	0.573668	0.78412	0.0222004	0.804263	0.995579	0.788441	6.28288e-05	6.28288e-05	magenta
HOXA1	0.0271411	-0.0435985	-0.0181058	-0.00304678	-0.0277098	0.0372102	-0.100258	0.100258	0.618507	0.423625	0.739769	0.955429	0.611169	0.494721	0.0652158	0.0652158	black
MTIF2	-0.0172347	0.161812	0.127239	0.0314162	-0.0309792	0.0454991	-0.361472	0.361472	0.751869	0.0028083	0.0190991	0.564318	0.569752	0.40368	6.68128e-12	6.68128e-12	blue
ATMIN	-0.0288857	0.056703	0.155966	0.0940942	0.0651649	0.0819318	-0.0748714	0.0748714	0.59612	0.297878	0.0039935	0.0836482	0.231441	0.1322	0.169018	0.169018	turquoise
TEPSIN	0.122471	0.0929268	-0.00721532	0.0514153	0.0382007	0.0867934	-0.0808856	0.0808856	0.0241267	0.0875729	0.8947	0.34528	0.483299	0.11068	0.137227	0.137227	turquoise
KRBA1	-0.0930845	-0.0475442	0.0321261	-0.0327688	-0.0244479	-0.0180454	0.162058	-0.162058	0.0870341	0.382858	0.555545	0.54766	0.653764	0.740607	0.00276617	0.00276617	brown
SMOC1	-0.0748254	-0.0226605	0.0295367	0.0866492	-0.0192304	0.128812	0.0189752	-0.0189752	0.16928	0.677603	0.587861	0.111276	0.724243	0.0176535	0.727757	0.727757	lightyellow
MBTPS1	0.00328924	0.0406945	0.127454	0.141586	0.0950779	0.0802318	0.0401477	-0.0401477	0.951887	0.455181	0.018895	0.00904359	0.0804526	0.140443	0.461265	0.461265	turquoise
DDT	-0.166081	0.0630878	-0.00774821	-0.0493608	-0.0436399	-0.0381077	-0.210766	0.210766	0.00215552	0.246687	0.886974	0.364923	0.423184	0.484364	9.21853e-05	9.21853e-05	grey
SMG6	0.0599283	-0.0121241	0.111308	0.070745	0.0318018	0.0896393	0.117747	-0.117747	0.271196	0.823994	0.0405411	0.193816	0.559544	0.0994233	0.0301973	0.0301973	turquoise
CUL1	-0.0335653	0.0411473	0.161241	0.0399813	0.0497139	0.0764895	-0.101501	0.101501	0.537965	0.450175	0.00290796	0.463127	0.361499	0.159968	0.061935	0.061935	blue
TRNT1	-0.122081	0.0444135	0.133239	0.00640284	-0.0198115	0.109919	-0.0942172	0.0942172	0.0245846	0.415003	0.0140848	0.9065	0.716263	0.0431266	0.0832432	0.0832432	turquoise
SPCS1	0.0128136	-0.0120458	-0.0472574	-0.063168	-0.0619723	-0.0235338	-0.175174	0.175174	0.81416	0.825111	0.385738	0.246085	0.255158	0.665914	0.00120174	0.00120174	grey
NKTR	0.0190318	0.100618	0.104328	0.138099	0.0121952	0.126234	-0.0860968	0.0860968	0.726976	0.0642529	0.0549814	0.0109123	0.822978	0.0200756	0.113582	0.113582	turquoise
SIRT2	-0.0405088	-0.0482425	-0.0735549	-0.0299584	-0.0192969	-0.0739076	0.0693304	-0.0693304	0.457242	0.375902	0.176658	0.582539	0.723329	0.174586	0.202903	0.202903	grey
TOR1A	-0.0683172	0.0935402	0.0164402	-0.0142401	0.00627476	0.00720209	0.00867942	-0.00867942	0.209597	0.0854925	0.762959	0.793913	0.908362	0.894892	0.873497	0.873497	turquoise
ITIH5	-0.0172469	-0.140192	0.0987162	0.0790283	0.00827903	-0.00779696	0.378934	-0.378934	0.7517	0.00975324	0.0694808	0.146512	0.879287	0.886267	5.11338e-13	5.11338e-13	brown
KIN	0.0216013	0.0633676	0.128019	0.025203	0.0432605	0.069213	-0.176653	0.176653	0.691884	0.244593	0.0183694	0.643797	0.42723	0.20367	0.00108989	0.00108989	blue
VDR	-0.0479544	0.108493	-0.0261613	-0.0294125	0.0403889	0.0538232	-0.130031	0.130031	0.378762	0.0459247	0.631239	0.589433	0.458575	0.32313	0.0165993	0.0165993	grey
ADGRL2	0.074902	-0.155387	0.0410296	0.0701659	0.0245438	0.0376844	0.276583	-0.276583	0.168843	0.00413272	0.451473	0.1975	0.652496	0.489235	2.28018e-07	2.28018e-07	yellow
PCDHB14	0.106512	0.0462282	0.104541	0.0308641	0.0429563	0.0518318	0.163926	-0.163926	0.0500633	0.396181	0.0544841	0.571187	0.430491	0.341381	0.00246544	0.00246544	turquoise
SMIM4	-0.100243	-0.00392975	0.0145574	-0.0214873	-0.064121	-0.0247975	-0.0799918	0.0799918	0.065255	0.942532	0.789427	0.693428	0.239018	0.649142	0.141637	0.141637	grey
GORASP2	0.015861	0.163592	0.00942196	0.0655718	-0.024012	0.0171355	-0.175143	0.175143	0.771072	0.00251689	0.862777	0.228535	0.659548	0.753251	0.00120424	0.00120424	turquoise
PHC2	0.0606719	-0.0617272	0.0276117	-0.00316801	0.0582986	0.013137	0.311817	-0.311817	0.265284	0.257046	0.612433	0.953658	0.284467	0.809559	4.44118e-09	4.44118e-09	grey
RELB	-0.00455042	0.0576196	0.0123586	-0.0328125	0.0512449	0.00661475	0.240086	-0.240086	0.933475	0.290124	0.820645	0.547126	0.346883	0.90342	7.83421e-06	7.83421e-06	green
RACGAP1	-0.0561667	0.0323172	0.0144528	-0.0224161	-0.000525529	0.0839342	-0.265798	0.265798	0.302478	0.553195	0.790905	0.680888	0.992308	0.122975	6.85676e-07	6.85676e-07	blue
NAT14	-0.0139569	-0.0112996	-0.0628909	0.00665979	0.00976736	0.0160774	0.213433	-0.213433	0.797923	0.835786	0.248168	0.902766	0.857799	0.768039	7.46559e-05	7.46559e-05	grey
F2RL3	0.0604308	-0.0461913	0.149054	0.063427	0.0264542	0.0894474	0.280063	-0.280063	0.267191	0.396558	0.00596669	0.244151	0.627422	0.100153	1.58203e-07	1.58203e-07	yellow
ATG2B	0.055052	0.0736966	0.0966482	0.131574	0.0607293	0.112105	-0.0534715	0.0534715	0.31219	0.175823	0.0755564	0.0153446	0.264831	0.0391172	0.326306	0.326306	turquoise
ILDR2	0.0236263	-0.145177	0.0599026	-0.0299327	0.0248393	0.0352832	0.11546	-0.11546	0.66468	0.00742163	0.271403	0.582863	0.64859	0.51735	0.0335785	0.0335785	black
ACVR1C	0.00447616	0.167549	0.0111508	-0.044334	-0.0751715	-0.0471926	-0.182184	0.182184	0.934559	0.00196534	0.837919	0.41584	0.167311	0.38639	0.00075107	0.00075107	grey
MYOC	-0.0228958	-0.0963418	0.033493	-0.0286104	-0.0178857	-0.00277416	0.231447	-0.231447	0.674446	0.0764922	0.538842	0.599629	0.74282	0.959414	1.6756e-05	1.6756e-05	brown
GPCPD1	0.0933299	0.0535384	0.0775441	0.00722308	-0.0309919	0.0457807	-0.0137749	0.0137749	0.0862014	0.3257	0.15427	0.894588	0.569593	0.400775	0.800501	0.800501	turquoise
ITIH2	0.0340378	-0.0996357	-0.0266211	-0.0338831	-0.0124024	-0.050447	-0.0503021	0.0503021	0.532254	0.0669106	0.62525	0.534121	0.820021	0.354452	0.355838	0.355838	grey
PLAG1	0.0325675	6.61388e-05	-0.0439304	0.0536974	-0.0494727	0.0213494	-0.031654	0.031654	0.550124	0.999032	0.420101	0.324264	0.363836	0.695297	0.561372	0.561372	purple
COTL1	-0.0588746	0.0139222	0.00803299	0.035929	0.0386143	0.0125965	-0.0262805	0.0262805	0.279728	0.798414	0.882849	0.509708	0.478571	0.817254	0.629685	0.629685	grey
PRRX2	-0.0762827	0.000675882	-0.0681513	-0.0229417	0.0824039	-0.0431442	0.0563144	-0.0563144	0.161104	0.990108	0.210709	0.673831	0.129978	0.428475	0.301207	0.301207	grey
LRCH2	0.0179786	-0.146921	0.202863	0.0760885	0.0100577	0.0058278	0.482204	-0.482204	0.741532	0.00673171	0.000169584	0.162176	0.853619	0.914864	3.8389e-21	3.8389e-21	brown
OPA3	0.0170029	-0.0714117	0.0829932	0.0739799	0.0301301	0.107712	0.080913	-0.080913	0.755099	0.189639	0.127245	0.174164	0.58038	0.0475205	0.137094	0.137094	turquoise
ENTPD3	0.0666908	-0.0134817	-0.20688	-0.114946	-0.0476507	-0.140562	-0.104338	0.104338	0.220674	0.804661	0.00012476	0.0343805	0.381792	0.00956008	0.0549583	0.0549583	grey
MIDN	0.0325832	0.0340915	0.127092	0.0625674	-0.0187482	0.102018	-0.100803	0.100803	0.549931	0.531608	0.0192389	0.250614	0.730887	0.0606116	0.0637595	0.0637595	turquoise
TTK	-0.0689333	0.0618574	0.0538904	0.0596884	-0.0301996	0.0969807	-0.290028	0.290028	0.205508	0.256042	0.322525	0.273123	0.579506	0.0745513	5.40129e-08	5.40129e-08	blue
RPL14	-0.152576	0.024201	0.0955506	0.0122107	-0.0974111	0.0187712	-0.0365182	0.0365182	0.00487241	0.657037	0.0789523	0.822757	0.0732666	0.73057	0.502787	0.502787	grey
APOBEC2	-0.024252	-0.153158	0.00301851	-0.00771991	0.0184342	0.0491973	-0.0456171	0.0456171	0.656361	0.00471019	0.955842	0.887384	0.735224	0.366516	0.402461	0.402461	salmon
LRPAP1	0.0656767	0.0363073	-0.0652649	-0.0149254	-0.00192566	-0.0316161	-0.00609863	0.00609863	0.227789	0.505259	0.230725	0.784234	0.971821	0.561841	0.910923	0.910923	blue
CHMP6	0.141163	-0.0171925	-0.077495	-0.031719	0.00606428	-0.0220129	0.111183	-0.111183	0.00925407	0.752456	0.154532	0.560568	0.911423	0.686322	0.0407673	0.0407673	grey
PTPDC1	0.0463774	-0.0225245	0.056763	0.0774761	-0.0302924	0.0664668	0.0765591	-0.0765591	0.394657	0.679431	0.297366	0.154632	0.578341	0.222232	0.159587	0.159587	turquoise
ZNF616	-0.0131291	0.0688761	0.143867	0.0546415	-0.00490594	0.0790395	-0.0946021	0.0946021	0.809671	0.205885	0.00798045	0.315818	0.928291	0.146454	0.0819858	0.0819858	turquoise
ZKSCAN8	-0.0222529	0.0198377	0.152374	0.0954349	0.0493203	0.0930472	0.103388	-0.103388	0.683085	0.715905	0.00492999	0.0793176	0.365317	0.0871613	0.0572175	0.0572175	turquoise
PDZD4	-0.0772593	-0.172544	0.109678	0.0230635	0.0204725	0.0154299	0.398202	-0.398202	0.155793	0.00142718	0.0435895	0.672199	0.707224	0.777129	2.49542e-14	2.49542e-14	brown
ACVR2B	0.0170477	-0.0201222	0.0072549	0.0217372	-0.0488537	0.0254031	0.0183523	-0.0183523	0.754475	0.71201	0.894126	0.690046	0.369876	0.641166	0.736356	0.736356	salmon
BCL2L2	0.0517824	-0.0983295	0.0891959	0.0236946	0.0281342	0.00199487	0.248557	-0.248557	0.341843	0.0705854	0.101114	0.663771	0.605719	0.970809	3.61436e-06	3.61436e-06	brown
PTX3	-0.0824001	-0.0453874	-0.00340307	0.0948565	0.0276525	-0.0596536	0.294134	-0.294134	0.129996	0.404837	0.950224	0.0811631	0.611907	0.273404	3.42652e-08	3.42652e-08	yellow
TRABD2A	-0.0784676	0.158519	0.141055	0.024428	-0.0238682	0.0226821	-0.172302	0.172302	0.149407	0.00342913	0.00930806	0.654029	0.661459	0.677312	0.00144979	0.00144979	grey
UBE2D4	0.0609499	-0.143416	0.079435	-0.0357563	0.0014211	-0.0511851	0.250567	-0.250567	0.263096	0.00818134	0.144439	0.511746	0.979203	0.347447	2.99564e-06	2.99564e-06	brown
CD200	0.0191038	-0.0534564	0.132868	0.0498718	0.0280923	0.0487734	0.433491	-0.433491	0.725986	0.326443	0.0143577	0.359974	0.606256	0.370664	5.79922e-17	5.79922e-17	yellow
TTC1	0.00668477	-0.0367376	0.0463055	0.0707684	0.0252906	0.0202569	0.051348	-0.051348	0.902403	0.500222	0.395391	0.193669	0.642645	0.710168	0.345913	0.345913	grey
MMP15	0.0754842	0.11151	-0.0116618	0.030852	0.0526656	0.0201062	-0.265501	0.265501	0.165546	0.0401759	0.830601	0.571338	0.333661	0.712228	7.06317e-07	7.06317e-07	grey
QKI	0.00631668	-0.104805	0.233575	0.13099	0.0523446	0.0548769	0.483579	-0.483579	0.907752	0.0538746	1.39312e-05	0.0158094	0.33662	0.313734	2.859e-21	2.859e-21	yellow
KIF21B	-0.000594832	0.0116244	0.127066	-0.00149953	0.0284553	0.0757905	-0.0889806	0.0889806	0.991294	0.831136	0.0192638	0.978055	0.601609	0.163831	0.101944	0.101944	green
CISH	-0.0688049	0.0973216	0.0571536	-0.0653019	0.0305625	0.0301861	-0.119766	0.119766	0.206355	0.0735324	0.294049	0.23046	0.574956	0.579676	0.0274596	0.0274596	grey
UBE4A	-0.0272095	0.0312675	0.118811	0.0977844	-0.0429967	0.126351	-0.207426	0.207426	0.617623	0.566164	0.0287272	0.0721671	0.430057	0.0199599	0.000119604	0.000119604	turquoise
PTPN14	0.0288516	-0.164453	0.106404	0.0867634	-0.00313311	0.071274	0.278414	-0.278414	0.596554	0.00238606	0.0502963	0.110804	0.954168	0.190496	1.88229e-07	1.88229e-07	turquoise
VASP	-0.119025	0.0313041	0.0365835	0.00250998	0.00638625	0.0382195	-0.0199557	0.0199557	0.0284392	0.56571	0.502023	0.963276	0.906741	0.483083	0.714289	0.714289	red
PRKX	-0.264802	0.0421222	0.134669	-0.0426947	0.0527617	0.0971808	-0.0719447	0.0719447	7.57241e-07	0.439504	0.0130769	0.433306	0.332778	0.0739519	0.186347	0.186347	blue
BSCL2	0.0247123	-0.0154436	-0.134125	-0.0663077	0.0196148	-0.0101024	0.0657682	-0.0657682	0.650267	0.776936	0.0134528	0.223343	0.718962	0.852976	0.227141	0.227141	grey
NPW	-0.0348307	0.0263632	-0.0142674	0.0303894	0.0463124	-0.0186416	0.121966	-0.121966	0.52274	0.628606	0.793527	0.577124	0.395321	0.732358	0.0247216	0.0247216	grey
AMBRA1	0.0409805	0.0044532	0.0758098	0.00451773	-0.00842649	0.0923779	-0.0469344	0.0469344	0.452014	0.934893	0.163724	0.933952	0.877154	0.0894686	0.388997	0.388997	turquoise
TRIM46	0.0105327	-0.0294867	0.0780596	0.106253	-0.0129879	0.0672729	0.0662173	-0.0662173	0.846789	0.588493	0.151541	0.0506265	0.811679	0.216663	0.223976	0.223976	grey
TLR6	-0.0232193	-0.0341287	0.0672082	0.120172	0.033068	0.0558611	0.144249	-0.144249	0.670114	0.531159	0.217106	0.0269349	0.544007	0.305121	0.00781336	0.00781336	green
PRCC	-0.0498533	-0.0539357	-0.0538855	-0.0185419	0.0397776	0.00386609	-0.130489	0.130489	0.360152	0.322118	0.32257	0.733736	0.46541	0.943462	0.0162178	0.0162178	blue
EXOC2	-0.0123021	0.00576773	0.160411	0.0452618	0.0337278	0.0622689	-0.0534395	0.0534395	0.821452	0.915738	0.00305878	0.40614	0.535998	0.252887	0.326597	0.326597	turquoise
MAT1A	0.0170482	-0.0935403	-0.0441098	0.0440162	-0.0345924	0.0381206	0.0159248	-0.0159248	0.754467	0.0854922	0.418204	0.419192	0.525591	0.484216	0.770178	0.770178	grey
CADPS2	0.090819	0.0236229	0.104511	0.00636086	-0.00317357	0.0417792	-0.111485	0.111485	0.095032	0.664727	0.054553	0.90711	0.953577	0.443242	0.0402209	0.0402209	turquoise
CCDC124	-0.0495319	0.0757785	-0.0543357	-0.151218	-0.0182812	-0.0638073	-0.0056195	0.0056195	0.363261	0.163899	0.318537	0.00527088	0.737341	0.241329	0.917896	0.917896	grey
MYEOV	0.00920803	0.0413343	0.0599103	0.0457259	-0.0113452	0.0660638	-0.0445926	0.0445926	0.865863	0.448117	0.271341	0.401339	0.835134	0.225055	0.413122	0.413122	grey
RAB11FIP1	0.0470205	-0.0103534	-0.0819948	-0.0695517	-0.0151165	-0.0522128	-0.236967	0.236967	0.388127	0.849367	0.131902	0.201461	0.781541	0.337839	1.03427e-05	1.03427e-05	turquoise
KCNIP4	0.0261925	-0.0329725	0.129578	-0.0153971	0.00631601	0.0179895	0.141517	-0.141517	0.630832	0.545172	0.0169844	0.77759	0.907762	0.741382	0.0090773	0.0090773	brown
IGFBP2	0.0186027	-0.103528	-0.0520364	-0.0235679	-0.0135463	0.00238666	-0.0700408	0.0700408	0.732896	0.0568791	0.339476	0.665459	0.803744	0.965079	0.198301	0.198301	grey
CTDSPL	0.0143995	0.0274201	0.091209	0.00418002	0.0617281	0.0159271	0.0556555	-0.0556555	0.791658	0.614903	0.0936151	0.938879	0.257038	0.770145	0.306907	0.306907	turquoise
TNFRSF17	-0.0149739	0.00943599	0.0867696	0.138091	-0.0125701	0.146999	0.0283621	-0.0283621	0.78355	0.862575	0.110778	0.0109172	0.817631	0.00670211	0.602801	0.602801	green
MEAF6	0.0125084	-0.00325329	0.141792	0.0239487	0.0039554	0.0140378	0.0537547	-0.0537547	0.81851	0.952412	0.00894246	0.660389	0.942158	0.796776	0.323748	0.323748	turquoise
DNAJB5	-0.0561663	-0.16267	0.0738523	-0.00983282	-0.0147555	-0.0419714	0.344863	-0.344863	0.302482	0.0026642	0.17491	0.856856	0.78663	0.441146	6.689e-11	6.689e-11	brown
NACA2	-0.141731	-0.0887275	0.0468284	-0.0266796	-0.0269702	0.0463174	-0.00490611	0.00490611	0.00897241	0.102926	0.390071	0.624491	0.62072	0.395269	0.928289	0.928289	grey
SNRPN	-0.037421	-0.173313	0.121563	0.000853193	0.0740382	-0.0261136	0.378865	-0.378865	0.492279	0.00135761	0.0252052	0.987513	0.173823	0.631861	5.16734e-13	5.16734e-13	brown
USHBP1	0.0881409	-0.0585132	0.168069	0.0846678	0.105543	0.0608455	0.355557	-0.355557	0.105231	0.282696	0.00190175	0.119723	0.0521977	0.263917	1.54132e-11	1.54132e-11	yellow
DYNC1I1	-0.0660323	-0.103579	0.0703775	0.0227641	-0.0186747	-0.0316531	0.297733	-0.297733	0.225276	0.0567574	0.196148	0.676212	0.731901	0.561383	2.28581e-08	2.28581e-08	brown
PROCR	-0.0619932	0.0271401	-0.0284775	-0.0140457	0.0138738	0.00896094	0.0135332	-0.0135332	0.254997	0.618521	0.601325	0.796665	0.7991	0.86943	0.803931	0.803931	grey
RASSF7	0.0286472	0.136237	-0.0168963	0.00605515	0.0162109	0.066995	-0.179311	0.179311	0.599159	0.0120442	0.756587	0.911556	0.766167	0.218571	0.000912538	0.000912538	grey
TNFSF12	-0.0552422	-0.140867	0.0954771	0.0143739	-0.00232858	-0.0432345	0.533891	-0.533891	0.310519	0.00940347	0.0791841	0.79202	0.965928	0.427508	2.25789e-26	2.25789e-26	brown
ZCCHC7	-0.133468	0.0879025	0.0611781	0.00605906	-0.0280564	0.0751064	-0.0702757	0.0702757	0.0139191	0.106179	0.26131	0.911499	0.606716	0.16768	0.196797	0.196797	skyblue
GYPC	-0.0243495	-0.179438	0.14385	0.0274059	0.0132672	-0.0380288	0.559092	-0.559092	0.655069	0.00090478	0.0079877	0.615086	0.807708	0.48527	2.87763e-29	2.87763e-29	brown
GARS	-0.0136524	0.125235	0.107125	0.0369909	0.0412819	0.0789858	-0.237278	0.237278	0.80224	0.021089	0.04875	0.49727	0.448693	0.14673	1.00623e-05	1.00623e-05	blue
RUNDC1	0.0826278	0.0133497	0.135274	-0.0140575	0.127105	0.120621	-0.125213	0.125213	0.128934	0.806536	0.0126693	0.796498	0.0192264	0.026366	0.021112	0.021112	turquoise
HIPK1	0.012803	-0.0237368	0.119289	0.0232047	0.00416473	0.0472078	-0.09252	0.09252	0.814313	0.663208	0.0280863	0.67031	0.939103	0.386238	0.0889747	0.0889747	turquoise
ZNF268	-0.0639406	-0.0233645	0.100502	0.00889856	0.0577233	0.047758	0.0316887	-0.0316887	0.240345	0.668174	0.0645608	0.870331	0.289255	0.38072	0.560942	0.560942	turquoise
MED26	-0.0123632	0.0918878	0.0852715	-0.0118466	0.0871717	0.0713198	-0.0856302	0.0856302	0.82058	0.0911887	0.117098	0.827958	0.109128	0.190211	0.11556	0.11556	blue
RTL10	0.0168184	0.0347419	-0.0801314	-0.0916797	-0.0036304	-0.0241635	-0.139005	0.139005	0.757673	0.523801	0.140941	0.0919272	0.946903	0.657536	0.0103969	0.0103969	darkgreen
RAB33B	-0.0159806	-0.0662568	0.126093	0.0731127	0.0529786	0.0255227	0.0951723	-0.0951723	0.769395	0.2237	0.0202158	0.17928	0.330792	0.639597	0.0801512	0.0801512	turquoise
CC2D1B	0.074777	0.0611252	0.0512856	0.0416662	0.014637	0.0979874	-0.0292693	0.0292693	0.169557	0.261724	0.346499	0.444478	0.788304	0.0715746	0.591247	0.591247	turquoise
DYNLL2	0.00520456	-0.0407132	0.0705061	0.00365316	0.0721766	0.0730374	0.0222831	-0.0222831	0.923939	0.454973	0.19533	0.946571	0.184928	0.17973	0.682679	0.682679	turquoise
GAL3ST2	0.0828777	-0.00113265	-0.012427	-0.0246307	-0.0375218	0.0123872	-0.0799174	0.0799174	0.127777	0.983423	0.81967	0.651346	0.491112	0.820238	0.142009	0.142009	grey
RPAP1	0.03024	-0.00675226	0.0256186	0.0268524	0.0519518	0.0501927	-0.10753	0.10753	0.578999	0.901423	0.638339	0.622247	0.340263	0.356887	0.0478988	0.0478988	turquoise
ZC3HC1	-0.00334505	0.00974513	-0.0002945	0.00628157	0.0753694	0.0317045	-0.073366	0.073366	0.951071	0.85812	0.99569	0.908263	0.166192	0.560748	0.177775	0.177775	blue
TRMT112	-0.137842	-0.00914665	0.0475495	-0.056549	-0.0587893	0.0174464	0.0762985	-0.0762985	0.0110629	0.866749	0.382806	0.299195	0.280427	0.748923	0.161017	0.161017	grey
FOXA3	0.03152	0.0276003	-0.134926	-0.00769854	-0.0358202	-0.0445589	-0.226939	0.226939	0.563031	0.61258	0.0129022	0.887693	0.510992	0.413476	2.46348e-05	2.46348e-05	grey
SP110	-0.0578544	0.0132617	0.189928	0.10113	0.0266027	0.0753692	0.174677	-0.174677	0.288159	0.807786	0.000437974	0.0629016	0.62549	0.166194	0.00124167	0.00124167	green
COMMD4	0.0418829	0.0043258	-0.017393	-0.0659618	-0.00140599	0.0160739	-0.046767	0.046767	0.44211	0.936752	0.749665	0.225773	0.979424	0.768087	0.390693	0.390693	blue
CNTFR	-0.0807109	-0.0336171	0.016988	-0.00505788	0.0736254	0.0835895	-0.100651	0.100651	0.138081	0.537338	0.755307	0.926077	0.176242	0.124526	0.0641644	0.0641644	grey
KCMF1	-0.0847191	0.117396	0.0512736	0.00179138	0.0116132	-0.0206328	-0.106974	0.106974	0.119498	0.0306966	0.346613	0.973785	0.831297	0.705039	0.0490699	0.0490699	blue
DDX56	-0.0720201	0.0972549	-0.0776165	-0.0332963	0.043962	-0.00527865	-0.204285	0.204285	0.185885	0.073731	0.153884	0.54123	0.419766	0.92286	0.000152231	0.000152231	blue
MPC1	-0.052177	0.057043	-0.0168542	0.0048263	-0.0418701	-0.0290405	-0.286593	0.286593	0.338171	0.294986	0.757173	0.929452	0.44225	0.594152	7.85974e-08	7.85974e-08	grey
PPCDC	0.085266	0.034146	-0.103664	-0.0622161	-0.00811037	-0.00630556	-0.0846832	0.0846832	0.117122	0.53095	0.0565531	0.253289	0.881728	0.907914	0.119656	0.119656	grey
FAM120C	0.0449561	-0.140183	0.073595	0.0302391	0.00533092	0.0711404	0.14554	-0.14554	0.40932	0.00975822	0.176421	0.57901	0.922098	0.191331	0.00727282	0.00727282	black
SLC48A1	-0.0391046	-0.0332444	0.0332411	-0.0715581	-0.0441672	0.0200296	0.116779	-0.116779	0.473	0.541861	0.541901	0.188731	0.417598	0.713277	0.0315905	0.0315905	grey
IQGAP1	0.0098955	0.0533025	0.106968	0.059447	0.0133664	0.135545	-0.0982415	0.0982415	0.855954	0.32784	0.049083	0.275071	0.806299	0.0124905	0.0708388	0.0708388	turquoise
PCOLCE	0.0577856	-0.0922341	0.0905308	0.00624186	-0.0361676	-0.0682322	0.631031	-0.631031	0.288734	0.0899705	0.0960902	0.90884	0.506899	0.210166	4.71531e-39	4.71531e-39	yellow
PCK1	-0.0105329	0.0216923	0.0242096	0.00470341	0.0308704	0.00404444	-0.166195	0.166195	0.846787	0.690652	0.656924	0.931244	0.571108	0.940858	0.00214028	0.00214028	grey
POLR2E	-0.0655456	0.0179712	-0.0452806	-0.104197	-0.0454154	-0.0586991	0.0141071	-0.0141071	0.228721	0.741635	0.405945	0.0552871	0.404547	0.281166	0.795795	0.795795	blue
GNPDA1	0.0695238	-0.0512061	0.124459	0.0420907	-0.0143917	0.0639454	-0.0494182	0.0494182	0.201642	0.347249	0.0219065	0.439847	0.791768	0.24031	0.364365	0.364365	blue
ZNF821	0.0715223	-0.0102155	-0.071103	-0.0259314	0.106716	-0.0269323	0.110093	-0.110093	0.188952	0.851349	0.191565	0.634243	0.0496235	0.621211	0.0427957	0.0427957	grey
IQSEC1	-0.0290978	-0.0800155	0.071688	0.0167247	-0.00244033	0.0652867	0.199768	-0.199768	0.593423	0.141519	0.187928	0.758981	0.964294	0.230569	0.00021398	0.00021398	red
ABCD2	-0.0283611	-0.0715042	0.227919	0.108368	0.0592486	0.0875239	0.237968	-0.237968	0.602813	0.189065	2.26706e-05	0.0461775	0.27668	0.107699	9.4647e-06	9.4647e-06	green
RPL32	-0.113454	-0.0510272	-0.0526433	-0.0604393	-0.0580231	0.0112421	0.0663621	-0.0663621	0.0368026	0.348938	0.333866	0.267124	0.286754	0.83661	0.222963	0.222963	grey
F10	-0.0411036	-0.0559763	-0.0572041	0.0365096	-0.0738196	0.0440367	-0.0264724	0.0264724	0.450656	0.304123	0.293622	0.502887	0.175101	0.418976	0.627184	0.627184	darkturquoise
BNIP2	0.06462	0.0703842	0.161045	0.109836	0.0455311	0.065959	0.0871322	-0.0871322	0.235375	0.196105	0.00294297	0.043286	0.40335	0.225793	0.109289	0.109289	turquoise
C16orf74	-0.0376659	0.00644316	-0.0457732	0.000864141	-0.0103363	0.0336712	0.0389539	-0.0389539	0.489449	0.905914	0.400851	0.987353	0.849612	0.536682	0.474708	0.474708	purple
LRGUK	0.054681	0.0246956	0.0567653	0.0256002	-0.0388223	-0.00129959	-0.0496194	0.0496194	0.315467	0.650488	0.297347	0.63858	0.476203	0.980981	0.362413	0.362413	grey
MFSD6L	-0.0941424	0.030513	-0.0730695	0.013254	-0.0442958	0.0144145	-0.143677	0.143677	0.0834893	0.575576	0.179538	0.807896	0.416242	0.791446	0.00806455	0.00806455	grey
MACC1	0.162166	0.111499	0.0495619	-0.0117568	0.00146481	0.04044	-0.191995	0.191995	0.00274801	0.0401949	0.36297	0.829242	0.978563	0.458007	0.000377871	0.000377871	turquoise
ATP9B	0.0378645	-0.00655405	0.113031	0.126045	0.0536334	0.0740425	-0.041132	0.041132	0.48716	0.904302	0.0375159	0.0202642	0.324842	0.173798	0.450343	0.450343	turquoise
TYMP	-0.0266593	0.047	0.0765348	-0.0381551	0.00800969	0.0635409	0.0768304	-0.0768304	0.624754	0.388334	0.15972	0.483821	0.883186	0.243303	0.158109	0.158109	tan
KIFAP3	0.062648	-0.0261384	0.133905	0.059909	0.091623	0.0681281	0.0611432	-0.0611432	0.250003	0.631538	0.0136072	0.271351	0.0921292	0.210864	0.261582	0.261582	turquoise
SNAPC3	-0.0427911	0.0823023	0.058719	-0.0658906	-0.0135323	-0.00218969	0.0936629	-0.0936629	0.432268	0.130454	0.281003	0.226275	0.803943	0.96796	0.0850814	0.0850814	grey
MMRN2	0.0370779	-0.0843751	0.140069	0.0818344	0.0819142	0.0520292	0.446664	-0.446664	0.496258	0.121012	0.00981833	0.132661	0.132283	0.339543	4.99355e-18	4.99355e-18	yellow
ITPR1	0.00706513	-0.147183	0.147196	0.13589	0.037678	0.0537429	0.358981	-0.358981	0.89688	0.00663327	0.00662844	0.0122661	0.489308	0.323853	9.52105e-12	9.52105e-12	brown
TMBIM6	0.00658305	-0.0761919	0.0522608	0.0741553	-0.0196828	0.1053	-0.192662	0.192662	0.903881	0.161604	0.337395	0.173142	0.718028	0.052744	0.000360186	0.000360186	turquoise
NQO2	-0.0665717	0.0903786	0.00360304	0.00151422	0.0732592	0.0462763	-0.0774687	0.0774687	0.221502	0.096653	0.947303	0.97784	0.178408	0.395689	0.154672	0.154672	grey
BTD	-0.00209792	-0.0495937	-0.071027	0.0251946	-0.00166749	-0.0397366	-0.0841693	0.0841693	0.969302	0.362662	0.192041	0.643908	0.975598	0.46587	0.121925	0.121925	grey
PML	0.0207221	0.00688646	0.0908634	0.0104063	0.0178884	0.110162	0.166647	-0.166647	0.703822	0.899474	0.0948698	0.848606	0.742783	0.0426651	0.00208031	0.00208031	tan
DPP3	-0.0340725	0.0808571	-0.0205932	-0.00073756	-0.00368078	0.0648653	-0.158273	0.158273	0.531836	0.137366	0.705578	0.989205	0.946168	0.233599	0.00348033	0.00348033	blue
TRMT5	-0.134353	0.0635733	0.1265	0.0788301	0.0260535	0.155109	-0.153899	0.153899	0.0132937	0.243062	0.019813	0.147531	0.632646	0.00420097	0.0045106	0.0045106	turquoise
GRINA	-0.0274763	0.0876579	-0.0116827	-0.0219478	-0.0106237	0.0246705	-0.0345973	0.0345973	0.614178	0.107159	0.830302	0.6872	0.845482	0.65082	0.525532	0.525532	grey
ASF1A	-0.032814	0.0198604	0.0951279	0.087629	0.0129425	0.0958148	-0.168632	0.168632	0.547107	0.715594	0.080293	0.107275	0.812325	0.0781239	0.00183498	0.00183498	blue
CCDC113	0.00895085	-0.0302802	0.0668006	-0.058512	0.108253	0.0924848	-0.0888956	0.0888956	0.869576	0.578494	0.219914	0.282706	0.0464093	0.0890966	0.102273	0.102273	turquoise
CD248	0.0986291	0.0191591	0.0761918	0.000530035	-0.0392603	0.0154836	0.510884	-0.510884	0.0697285	0.725225	0.161605	0.992242	0.471238	0.776374	6.19883e-24	6.19883e-24	yellow
GCLC	0.0830446	-0.0104688	0.0221148	0.0573183	-0.0336957	0.00599216	-0.188977	0.188977	0.127009	0.847707	0.684947	0.292657	0.536386	0.912472	0.000468475	0.000468475	turquoise
AFAP1L2	0.0607736	0.00963572	-0.0362931	-0.0060777	-0.0231783	-0.01177	0.0285066	-0.0285066	0.264482	0.859696	0.505425	0.911228	0.670663	0.829053	0.600953	0.600953	purple
ENHO	-0.060446	0.0188643	-0.0600507	-0.0603123	-0.0457885	-0.0293195	-0.109748	0.109748	0.267071	0.729285	0.270217	0.268132	0.400694	0.590611	0.0434553	0.0434553	grey
SPAAR	-0.0132586	-0.0295612	0.0426962	0.0361521	0.0198029	0.0400175	0.217074	-0.217074	0.807831	0.587552	0.43329	0.507081	0.716382	0.462721	5.57422e-05	5.57422e-05	lightyellow
MAP4K5	0.0723703	0.0427288	0.133591	0.0731153	0.0334543	0.0634883	0.0487486	-0.0487486	0.183749	0.432939	0.0138309	0.179265	0.53931	0.243694	0.370908	0.370908	turquoise
SNX7	-0.0457735	0.0788314	0.038929	-0.0140885	0.0827137	-0.0113502	-0.109927	0.109927	0.400849	0.147524	0.474991	0.796058	0.128536	0.835061	0.0431118	0.0431118	turquoise
CCDC74B	-0.0596554	0.00947947	-0.020285	-0.0421758	0.0336778	0.0174703	0.19736	-0.19736	0.273389	0.861948	0.709785	0.438922	0.536602	0.74859	0.000255785	0.000255785	grey
P2RX4	0.103789	0.00292726	-0.0238676	-0.0631189	-0.021706	-0.0169164	0.00624383	-0.00624383	0.0562536	0.957176	0.661467	0.246454	0.690467	0.756306	0.908812	0.908812	grey
FAM83H	-0.0517066	0.15703	-0.0348051	-0.0137273	-0.0240037	0.0290241	-0.272309	0.272309	0.342551	0.00374892	0.523046	0.801177	0.659657	0.59436	3.54759e-07	3.54759e-07	blue
TNPO1	0.0111627	-0.00230256	0.176126	0.122929	-0.0461609	0.135928	-0.12671	0.12671	0.837748	0.966309	0.00112863	0.0235994	0.39687	0.0122417	0.0196073	0.0196073	turquoise
SLC35F6	-0.0142719	-0.0102745	0.0990689	-0.0033122	0.0162984	0.0860956	-0.0416545	0.0416545	0.793463	0.850501	0.0684856	0.951551	0.764942	0.113587	0.444606	0.444606	turquoise
FIBIN	0.00889419	-0.126081	0.186429	0.0493275	-0.0304166	-0.00570798	0.591174	-0.591174	0.870394	0.0202273	0.000560281	0.365247	0.576783	0.916608	2.49658e-33	2.49658e-33	yellow
RAP1GAP	0.0916017	-0.0171126	-0.0842297	-0.0131217	0.0425728	-0.120324	-0.0300023	0.0300023	0.092205	0.75357	0.121657	0.809777	0.434621	0.0267418	0.581987	0.581987	grey
AKAP17A	0.00655408	-3.88871e-06	0.0456482	0.0247563	0.0174035	0.108546	-0.0755829	0.0755829	0.904302	0.999943	0.40214	0.649687	0.74952	0.0458175	0.164992	0.164992	turquoise
YIF1A	-0.0237004	0.090995	0.00106644	-0.015658	0.0205479	0.097968	0.0093331	-0.0093331	0.663694	0.0943905	0.984392	0.773924	0.706196	0.0716312	0.864059	0.864059	grey
RNF170	0.0207885	-0.048216	0.0599228	-0.011947	-0.0122407	-0.00398514	-0.0680056	0.0680056	0.702917	0.376164	0.271241	0.826523	0.822329	0.941724	0.211688	0.211688	turquoise
LZTFL1	-0.0468422	0.0237038	0.0708045	-0.0011776	-0.0272657	0.0542269	0.0123439	-0.0123439	0.38993	0.663648	0.193441	0.982766	0.616896	0.319508	0.820855	0.820855	turquoise
FAM174C	-0.11977	0.0585457	-0.0289584	-0.105839	-0.0256708	-0.0405375	-0.00545774	0.00545774	0.0274544	0.282427	0.595195	0.0515383	0.637654	0.456923	0.920251	0.920251	grey
EHMT1	0.0122385	0.0474562	0.0833362	0.0176159	0.00669741	0.0966923	-0.0465753	0.0465753	0.82236	0.38374	0.125676	0.746566	0.902219	0.0754225	0.392641	0.392641	turquoise
ZNF879	-0.0116619	-0.0794852	0.0441822	-0.0537175	0.0419196	-0.038489	0.129773	-0.129773	0.8306	0.144185	0.417439	0.324083	0.44171	0.480001	0.0168175	0.0168175	grey
IQCE	0.0826265	0.0356245	0.0640656	0.0168075	0.0281729	0.0737242	-0.0984051	0.0984051	0.128941	0.513304	0.239425	0.757826	0.605223	0.175661	0.0703684	0.0703684	turquoise
ERCC8	0.0845109	-0.0101486	0.178978	0.0920032	0.0113778	0.105498	-0.0505817	0.0505817	0.120413	0.852311	0.000933221	0.0907813	0.834666	0.0522993	0.353168	0.353168	turquoise
FBP1	0.104909	0.0141548	-0.0407449	-0.0690059	0.0344125	-0.0817414	-0.176022	0.176022	0.0536343	0.79512	0.454621	0.205029	0.527748	0.133104	0.00113638	0.00113638	grey
AC118549.1	0.0356271	0.0608237	0.123102	0.0983376	0.0242588	0.0881703	-0.185977	0.185977	0.513274	0.264088	0.0234023	0.0705622	0.656271	0.105114	0.000578245	0.000578245	turquoise
TNFRSF14	0.053019	0.132974	0.0550087	0.0314932	-0.00424663	0.0745877	-0.144945	0.144945	0.330423	0.0142794	0.312571	0.563364	0.937907	0.170642	0.00751759	0.00751759	grey
C1orf56	0.0108468	-0.0563573	-0.0641304	-0.00798549	0.0174405	-7.10876e-05	-0.00547919	0.00547919	0.842279	0.300838	0.238949	0.883536	0.749004	0.99896	0.919939	0.919939	grey
CD1A	-0.0140271	-0.0762087	0.0520561	0.0145543	-0.0447992	-0.0132219	0.0442458	-0.0442458	0.796928	0.161512	0.339293	0.789471	0.410959	0.808353	0.416768	0.416768	grey
NRROS	-0.0241803	-0.0703517	0.0941175	0.0209549	0.0194122	0.0292301	0.260439	-0.260439	0.657312	0.196312	0.0835714	0.700654	0.721743	0.591744	1.16424e-06	1.16424e-06	green
ATP2B4	-0.0449438	-0.142798	0.0993335	0.0255621	0.0321739	-0.0411664	0.332856	-0.332856	0.409449	0.00846369	0.0677467	0.639079	0.554957	0.449965	3.25692e-10	3.25692e-10	brown
ADAT1	0.081155	-0.0139644	0.153768	0.102085	0.115688	0.122212	-0.122192	0.122192	0.135919	0.797817	0.00454528	0.0604434	0.0332277	0.02443	0.0244543	0.0244543	turquoise
BRMS1L	0.00631207	0.0112865	0.0803894	0.10599	0.0102198	0.0559531	0.0370242	-0.0370242	0.907819	0.835975	0.139662	0.0512039	0.851287	0.304323	0.496883	0.496883	turquoise
RAB3GAP1	0.0275624	0.011558	0.181736	0.111042	0.048425	0.0777707	0.0293297	-0.0293297	0.613068	0.832086	0.000774366	0.0410248	0.374096	0.153065	0.590482	0.590482	turquoise
CCL28	-0.0143943	0.122502	-0.100344	-0.0598799	-0.0814265	-0.044324	-0.231497	0.231497	0.791732	0.0240907	0.0649837	0.271584	0.13461	0.415945	1.66846e-05	1.66846e-05	grey
BICDL2	0.169262	0.122199	-0.0502923	0.00751033	-0.0217519	0.00145112	-0.235953	0.235953	0.0017628	0.0244455	0.355932	0.890421	0.689847	0.978763	1.13113e-05	1.13113e-05	pink
AGAP4	0.130094	0.0604785	0.0734167	0.0700339	0.0576354	0.0921526	-0.0420816	0.0420816	0.0165465	0.266813	0.177474	0.198346	0.289991	0.0902559	0.439946	0.439946	turquoise
FAM216A	-0.0568215	-0.13932	0.0743198	0.0254496	0.0204924	0.0577077	0.127545	-0.127545	0.296868	0.0102221	0.172188	0.640556	0.706953	0.289386	0.0188101	0.0188101	grey
TSPAN32	-0.0227547	0.0442802	0.0217003	-0.0800932	-0.0147232	-0.0142968	-0.0103029	0.0103029	0.676338	0.416406	0.690545	0.141132	0.787087	0.793111	0.850092	0.850092	grey
KPNA6	-0.00229372	-0.0221057	0.0948057	0.0538447	0.0192213	0.0547328	-0.00339298	0.00339298	0.966438	0.68507	0.081327	0.322937	0.724368	0.315009	0.950371	0.950371	turquoise
ALG5	0.0376053	0.120484	0.0433577	0.0687485	0.0549083	0.115937	-0.181906	0.181906	0.490147	0.0265386	0.426191	0.206728	0.313457	0.0328473	0.000765436	0.000765436	grey
MOCS2	-0.0165098	-0.0201788	0.0227025	0.0550924	-0.0422572	-0.0106422	0.041557	-0.041557	0.761984	0.711237	0.677039	0.311835	0.438039	0.845217	0.445673	0.445673	grey
CSNK1G1	0.0391332	0.043758	0.0799915	0.00579288	-0.00960265	0.0487005	-0.144128	0.144128	0.472676	0.421929	0.141639	0.915372	0.860173	0.371381	0.00786606	0.00786606	turquoise
TTC37	0.149382	-0.0520516	0.154682	0.175459	0.009674	0.132756	-0.0373126	0.0373126	0.00585616	0.339335	0.00430813	0.0011794	0.859144	0.0144411	0.493534	0.493534	turquoise
ZNF75A	0.077046	-0.102162	0.00247887	-0.0183705	0.111247	0.046352	0.0395534	-0.0395534	0.156942	0.0602477	0.963731	0.736104	0.0406522	0.394916	0.467931	0.467931	grey
CYBRD1	0.00560878	-0.181644	0.159875	0.0936943	0.000937054	0.0373889	0.419288	-0.419288	0.918052	0.000779244	0.00315984	0.0849762	0.986286	0.49265	7.25758e-16	7.25758e-16	yellow
TACO1	-0.0491355	0.0399244	-0.0474789	-0.0519618	0.0708472	0.00277786	-0.170677	0.170677	0.367119	0.463764	0.383513	0.34017	0.193172	0.95936	0.00161015	0.00161015	blue
CDC37	-0.0373148	0.0580345	0.0387682	-0.116302	-0.0252687	-0.0054164	-0.102737	0.102737	0.493509	0.286659	0.476818	0.0322983	0.642933	0.920853	0.0588108	0.0588108	black
FRS3	0.0276191	0.122541	-0.0959296	-0.0982817	-0.0436717	-0.0761212	-0.0318283	0.0318283	0.612337	0.0240457	0.0777662	0.0707231	0.422846	0.161995	0.559218	0.559218	grey60
PIGZ	0.0773487	0.000134845	0.0373869	0.0743788	0.00404355	0.0638099	-0.0536958	0.0536958	0.155314	0.998026	0.492673	0.171847	0.940871	0.241309	0.324278	0.324278	grey
FAM162B	0.0182233	-0.0737232	0.170206	0.0453823	0.100301	0.0561791	0.278421	-0.278421	0.738142	0.175667	0.00165952	0.40489	0.0651009	0.302372	1.88091e-07	1.88091e-07	yellow
C15orf65	0.0489916	-0.0346401	0.02792	-0.00476714	-0.034378	-0.0629013	-0.00353219	0.00353219	0.368525	0.52502	0.608467	0.930315	0.528162	0.24809	0.948338	0.948338	grey
KATNAL1	-0.0719893	-0.140897	0.0890265	0.0215771	0.0210499	-0.014726	0.351735	-0.351735	0.186074	0.00938827	0.101767	0.692212	0.699362	0.787047	2.62108e-11	2.62108e-11	brown
N4BP2L1	0.0686791	0.0137133	0.130771	0.0260874	0.0282831	0.0306642	0.05037	-0.05037	0.207188	0.801375	0.0159867	0.632203	0.603812	0.573684	0.355189	0.355189	black
LAMP5	-0.0256866	-0.12137	0.026844	-0.0561444	0.00138257	0.0342147	0.350964	-0.350964	0.637447	0.0254384	0.622356	0.302671	0.979766	0.530124	2.91475e-11	2.91475e-11	grey
VPS13C	0.0996792	0.0779902	0.16269	0.0765736	0.062376	0.0967284	-0.0394904	0.0394904	0.066791	0.151906	0.00266083	0.159508	0.252069	0.075313	0.468641	0.468641	turquoise
PDE6D	-0.00162566	0.00953539	-0.0114324	-0.124081	0.0368515	-0.01604	0.00779693	-0.00779693	0.97621	0.861142	0.833885	0.0223141	0.498894	0.768563	0.886268	0.886268	grey
KCTD14	0.0163135	0.117235	0.0280593	-0.0281992	-0.0202372	0.0265937	-0.123892	0.123892	0.76473	0.0309284	0.606678	0.604885	0.710437	0.625606	0.0225212	0.0225212	grey
ATP11B	0.0466925	0.00114857	0.114257	0.073444	0.00825251	0.070214	-0.181909	0.181909	0.391449	0.98319	0.0354816	0.177313	0.879671	0.197192	0.000765294	0.000765294	turquoise
EML4	0.0703906	0.0666457	0.128814	0.124598	0.066758	0.144529	-0.224968	0.224968	0.196065	0.220987	0.0176514	0.0217576	0.220209	0.00769336	2.90845e-05	2.90845e-05	turquoise
PITX1	0.011731	-0.0300048	-0.172746	-0.064488	-0.0311494	-0.0401664	-0.0735592	0.0735592	0.829611	0.581956	0.00140858	0.236335	0.567633	0.461057	0.176632	0.176632	pink
DCLK1	0.0345923	-0.0434008	-0.0130637	0.064664	-0.0142856	-0.0178023	0.0851415	-0.0851415	0.525592	0.425732	0.810602	0.235055	0.793269	0.743978	0.11766	0.11766	purple
RHBDF1	0.0470689	0.136138	0.137551	0.0542376	0.0684615	0.120069	0.0474086	-0.0474086	0.387639	0.0121073	0.0112355	0.319413	0.208634	0.0270679	0.384218	0.384218	turquoise
EFNB1	-0.0312988	0.0566794	0.0291731	-0.0601692	-0.0266552	0.00299888	-0.135044	0.135044	0.565776	0.29808	0.592467	0.269272	0.624807	0.956129	0.0128229	0.0128229	grey
RNF135	-0.0180872	0.0307886	0.0950948	0.0417937	0.146247	-0.0285113	0.100818	-0.100818	0.740027	0.572129	0.0803987	0.443083	0.00699103	0.600893	0.0637198	0.0637198	grey
ALS2CL	0.064904	0.0670555	-0.0111972	0.0424543	-0.0434685	0.0634108	-0.148267	0.148267	0.233319	0.218155	0.837254	0.435902	0.425009	0.244272	0.00623914	0.00623914	purple
CTBS	-0.0300323	0.0730812	0.215243	0.0981062	0.00357572	0.0539769	-0.0261698	0.0261698	0.581609	0.179468	6.46015e-05	0.0712298	0.947702	0.321748	0.631129	0.631129	turquoise
TMSB15A	0.00879792	0.0175241	0.00939353	0.0141308	0.0262435	0.0771603	0.144042	-0.144042	0.871785	0.747842	0.863187	0.795459	0.630167	0.156325	0.00790333	0.00790333	grey
INPP5B	0.00858931	-0.0591602	0.145957	0.0404222	0.0713129	0.0849288	0.186128	-0.186128	0.8748	0.277398	0.00710544	0.458205	0.190254	0.118583	0.000572176	0.000572176	green
KCTD15	0.00983781	-0.105618	0.0949406	0.0635075	0.0647076	0.0698247	0.34007	-0.34007	0.856785	0.0520295	0.0808927	0.243552	0.234739	0.199693	1.26853e-10	1.26853e-10	brown
TSACC	-0.0448975	-0.0238508	-0.071633	-0.0627325	0.0684366	-0.0325874	-0.185283	0.185283	0.409932	0.661691	0.188267	0.249363	0.2088	0.54988	0.000606819	0.000606819	grey
ABITRAM	-0.000708283	0.0761132	0.0688873	-0.0278841	0.000728797	0.0618199	-0.162937	0.162937	0.989634	0.162039	0.205811	0.608928	0.989333	0.256331	0.00262074	0.00262074	blue
KLC1	0.0619741	-0.0327079	0.087902	0.0991161	0.0445943	0.0986936	0.132012	-0.132012	0.255144	0.548405	0.106181	0.0683533	0.413104	0.069545	0.015004	0.015004	turquoise
ADH4	0.0747727	-0.102157	0.0415244	0.136508	-0.02522	0.0791779	-0.0705911	0.0705911	0.169582	0.0602618	0.44603	0.0118736	0.643573	0.145747	0.194791	0.194791	grey
IFIT5	-0.0684243	0.0497889	0.185971	0.0131606	-0.0170168	0.0475135	0.082908	-0.082908	0.208882	0.360773	0.000578457	0.809223	0.754905	0.383166	0.127638	0.127638	grey
EXD2	-0.0237008	0.0119236	0.0700985	-0.00242853	0.0158454	0.049456	-0.0609492	0.0609492	0.663688	0.826857	0.197931	0.964467	0.771292	0.363998	0.263102	0.263102	turquoise
COASY	0.0470248	0.100089	0.0534471	-0.0667775	0.0473885	0.0482811	-0.205116	0.205116	0.388084	0.0656713	0.326528	0.220074	0.38442	0.375519	0.000142865	0.000142865	blue
RPS6KA2	0.0798335	-0.0242436	0.102121	0.0663504	0.0015949	0.0401534	0.317979	-0.317979	0.142429	0.656473	0.0603508	0.223045	0.97666	0.461202	2.1094e-09	2.1094e-09	yellow
CYP7B1	0.0298378	-0.0819721	0.0696624	0.0293443	0.018883	-0.0121869	0.381819	-0.381819	0.584059	0.132009	0.200743	0.590296	0.729028	0.823096	3.29398e-13	3.29398e-13	yellow
IFT52	0.0711247	0.0381722	0.034715	0.0541691	0.0226311	-0.0081865	0.00423886	-0.00423886	0.191429	0.483625	0.524123	0.320025	0.677998	0.880626	0.938021	0.938021	blue
NRBP2	-0.0522321	0.0538268	-0.0178758	-0.0203848	0.0386961	-0.00679692	0.0614849	-0.0614849	0.337661	0.323098	0.742958	0.708421	0.477639	0.900774	0.258921	0.258921	grey
NPIPB15	0.114384	0.132108	-0.0576263	0.0236255	0.0455339	0.0198952	-0.240609	0.240609	0.0352767	0.0149309	0.290067	0.664691	0.403321	0.715117	7.47491e-06	7.47491e-06	grey
SMARCA5	0.0240746	0.0276666	0.143093	0.141047	0.0671804	0.138859	-0.109498	0.109498	0.658715	0.611725	0.00832786	0.00931203	0.217297	0.010478	0.043937	0.043937	turquoise
FAM24B	0.117201	0.0910284	-0.0564464	0.0109134	0.0128627	0.00844358	-0.0603754	0.0603754	0.0309768	0.0942689	0.300073	0.841323	0.813461	0.876907	0.267631	0.267631	grey
FBXO33	-0.024577	0.0367027	0.12882	0.0671846	0.043222	0.103274	-0.070221	0.070221	0.652057	0.50063	0.017646	0.217268	0.427643	0.0574944	0.197147	0.197147	turquoise
DNALI1	-0.0593222	-0.0917163	-0.0874716	-0.00862025	-0.032024	-0.00985907	-0.00757127	0.00757127	0.276082	0.0917968	0.10791	0.874352	0.556802	0.856479	0.889538	0.889538	grey
IPMK	-0.0281252	0.108436	0.0795169	0.0188075	-0.0285614	0.0297156	-0.275162	0.275162	0.605834	0.0460406	0.144024	0.730069	0.600254	0.585601	2.64336e-07	2.64336e-07	turquoise
SPATA12	0.0828765	0.00231918	-0.0523636	-0.123537	0.045711	-0.0723067	-0.0805537	0.0805537	0.127783	0.966066	0.336444	0.0229137	0.401492	0.184135	0.138852	0.138852	grey
RRN3	-0.00475462	0.0580657	0.19225	0.0783168	0.121306	0.112175	-0.127632	0.127632	0.930497	0.286399	0.000371017	0.150193	0.025517	0.0389937	0.0187286	0.0187286	turquoise
ANK1	-0.0485527	0.000107872	-0.0429961	-0.0439572	-0.0412612	-0.0312867	0.0278952	-0.0278952	0.372836	0.998421	0.430063	0.419817	0.448921	0.565926	0.608785	0.608785	grey
UGGT1	0.0029437	0.0188792	0.117421	0.132413	0.0417408	0.126533	-0.159831	0.159831	0.956936	0.729079	0.0306614	0.0146984	0.443661	0.0197802	0.00316823	0.00316823	turquoise
ASB1	0.0825917	-0.050521	-0.0110621	0.0505623	0.0196453	-0.00604876	0.165527	-0.165527	0.129103	0.353746	0.83919	0.353353	0.718543	0.911649	0.00223162	0.00223162	turquoise
GTF2E1	-0.00872651	0.0450229	0.137177	0.0544468	0.00289671	0.102459	-0.0853937	0.0853937	0.872817	0.408624	0.0114607	0.317547	0.957623	0.0595009	0.116572	0.116572	turquoise
POLR2H	-0.0235487	0.159475	-0.044159	-0.0221611	0.00901224	-0.00480208	-0.170645	0.170645	0.665716	0.00323727	0.417684	0.684322	0.86869	0.929805	0.00161347	0.00161347	blue
TBC1D9	0.0200936	-0.0389728	0.0962402	0.131105	0.0525069	0.0951366	0.197205	-0.197205	0.712401	0.474494	0.0768045	0.0157169	0.335122	0.0802652	0.000258726	0.000258726	green
SSX2IP	0.0277969	0.0720888	0.139929	-0.0296416	0.0449727	0.0364393	-0.18611	0.18611	0.610049	0.185464	0.00989274	0.586536	0.409147	0.503711	0.000572887	0.000572887	blue
CMTM4	0.0329916	0.0415322	0.0119405	-0.0323104	0.00218055	0.0225828	-0.281939	0.281939	0.54494	0.445944	0.826616	0.553278	0.968093	0.678647	1.29637e-07	1.29637e-07	turquoise
TSPAN5	0.0823419	0.0777605	-0.100588	-0.0765096	-0.00849594	-0.0766345	0.118289	-0.118289	0.130268	0.15312	0.0643322	0.159858	0.87615	0.159175	0.0294405	0.0294405	lightcyan
HSPA5	-0.0802678	0.105762	0.0271787	0.0961047	-0.00711935	0.0712335	-0.250156	0.250156	0.140264	0.051708	0.618021	0.077223	0.896093	0.190749	3.11325e-06	3.11325e-06	blue
ASAH2B	0.0745781	0.094416	0.0336063	-0.0232739	-0.00899427	0.0273491	-0.159861	0.159861	0.170698	0.0825917	0.537468	0.669384	0.868949	0.61582	0.00316257	0.00316257	turquoise
IFT140	0.0990351	-0.043975	0.0238333	0.0172411	0.042431	-0.0143663	0.0668889	-0.0668889	0.0685804	0.419629	0.661924	0.751781	0.436155	0.792128	0.219303	0.219303	turquoise
SCGB3A1	0.0501718	-0.0493286	-0.0946442	-0.0682496	-0.00361734	-0.10189	-0.060115	0.060115	0.357088	0.365236	0.0818491	0.210049	0.947094	0.0609382	0.269704	0.269704	grey
MFSD4A	0.0625483	-0.127915	0.00530985	-0.0141278	-0.0552974	-0.0831753	0.0109613	-0.0109613	0.250759	0.0184653	0.922405	0.795502	0.310035	0.12641	0.840636	0.840636	grey
CDC25B	0.0548001	0.0967382	0.027256	-0.0687915	-0.0171061	0.0476485	-0.133083	0.133083	0.314413	0.0752834	0.617022	0.206444	0.753661	0.381814	0.0141993	0.0141993	blue
RER1	-0.018247	0.108512	-0.0831743	-0.00583598	0.023274	0.00678722	-0.188401	0.188401	0.737814	0.0458856	0.126415	0.914745	0.669383	0.900915	0.000487932	0.000487932	blue
MPZ	0.0368163	-0.0387656	0.00317063	0.0729053	-0.0153271	0.0329426	0.0786676	-0.0786676	0.499304	0.476848	0.95362	0.180521	0.778576	0.545537	0.14837	0.14837	salmon
CNPY4	-0.00746395	-0.0475296	0.003145	-0.00525303	-0.0455598	-0.0507924	0.25502	-0.25502	0.891094	0.383005	0.953994	0.923233	0.403053	0.351163	1.96537e-06	1.96537e-06	royalblue
MON1A	-0.0920139	-0.0261652	-0.0712268	-0.0952917	-0.0303702	-0.0319638	-0.137146	0.137146	0.0907436	0.631188	0.190791	0.0797713	0.577365	0.557545	0.0114795	0.0114795	blue
CIAO3	0.0554459	0.0610787	0.00214893	-0.0254334	0.0204497	-0.0302454	-0.107628	0.107628	0.308735	0.262087	0.968556	0.640768	0.707536	0.578932	0.0476951	0.0476951	grey
TMEM41A	-0.0195857	0.0845542	0.0534075	-0.00747577	0.0204106	0.0128987	-0.149748	0.149748	0.71936	0.120222	0.326886	0.890922	0.708069	0.812949	0.00573488	0.00573488	turquoise
MLPH	0.0577018	0.066729	-0.0735545	0.00945963	-0.0172646	-0.0213592	-0.207476	0.207476	0.289435	0.220409	0.17666	0.862234	0.751452	0.695164	0.000119146	0.000119146	grey
RBM24	-0.0452777	-0.118339	0.0632798	-0.00464826	0.0646567	-0.092819	0.245748	-0.245748	0.405975	0.0293716	0.245249	0.932048	0.235109	0.0879424	4.68567e-06	4.68567e-06	brown
GNAO1	-0.0613077	-0.153936	0.0963727	0.0139138	-0.0106634	-0.0145269	0.40267	-0.40267	0.260299	0.00450096	0.0763975	0.798534	0.844912	0.789858	1.20384e-14	1.20384e-14	brown
ZFYVE28	0.0202823	0.0672723	0.0671649	-0.0288394	0.0256905	0.107675	-0.132371	0.132371	0.709821	0.216667	0.217403	0.59671	0.637396	0.0475971	0.0147301	0.0147301	turquoise
ZNF785	0.122272	-0.0268286	0.105365	0.100868	0.130381	0.110404	0.0828579	-0.0828579	0.0243597	0.622556	0.0525984	0.0635896	0.0163078	0.0422091	0.127869	0.127869	turquoise
CIRBP	0.0661153	-0.0416126	0.106038	0.0826962	0.0129766	0.0581161	0.233731	-0.233731	0.224693	0.445064	0.0510974	0.128617	0.81184	0.285981	1.37429e-05	1.37429e-05	brown
CEP170B	0.0599997	0.0789129	0.0546487	0.0948536	0.0550031	0.113997	-0.202325	0.202325	0.270625	0.147104	0.315754	0.0811724	0.312621	0.0359048	0.000176624	0.000176624	turquoise
USP2	-0.0387271	-0.052963	0.0368369	0.0126062	-0.0628111	0.0324501	0.0864967	-0.0864967	0.477286	0.330935	0.499064	0.817116	0.24877	0.551563	0.111909	0.111909	grey
ZNF69	0.0425368	0.00287109	0.0577518	-0.040986	-0.0238111	0.0469244	-0.130941	0.130941	0.435011	0.957997	0.289017	0.451954	0.662219	0.389099	0.0158489	0.0158489	grey
ERV3-1	0.129197	0.129502	-0.10371	-0.014158	0.0928995	-0.0351596	-0.0685754	0.0685754	0.0173145	0.0170501	0.0564428	0.795075	0.0876663	0.51882	0.207876	0.207876	grey
TEAD4	-0.104157	0.00974913	0.0744745	0.040011	-0.00993633	0.0855929	0.0615383	-0.0615383	0.0553827	0.858062	0.171294	0.462794	0.855366	0.115719	0.258508	0.258508	lightyellow
ADGRL1	0.0145696	0.0207603	-0.0206809	-0.0702856	0.0875674	0.0194392	-0.0307545	0.0307545	0.789254	0.703302	0.704384	0.196734	0.107523	0.721372	0.572555	0.572555	turquoise
CDR2L	0.0104939	-0.0484295	0.0315139	0.0676881	0.0420797	0.052859	-0.0686556	0.0686556	0.847347	0.374052	0.563106	0.213834	0.439967	0.331887	0.207344	0.207344	grey
SMYD4	0.0346097	-0.00246323	0.139631	0.0868806	0.0327793	0.102864	-0.0263904	0.0263904	0.525384	0.963959	0.0100528	0.110321	0.547532	0.058496	0.628252	0.628252	turquoise
EIF3D	-0.0900069	0.0489453	0.0437908	-0.0325183	0.00280398	0.0674503	-0.11877	0.11877	0.0980379	0.368978	0.421581	0.550727	0.958978	0.215451	0.0287822	0.0287822	blue
TRRAP	0.0756938	0.00788548	0.0725092	0.0277419	-0.0135132	0.0705755	-0.0965027	0.0965027	0.164372	0.884985	0.182906	0.610756	0.804214	0.194889	0.0759996	0.0759996	grey
ZNF684	-0.0230598	-0.00731326	0.0860017	0.011552	-0.0689208	0.00090351	-0.0686618	0.0686618	0.672249	0.893279	0.113983	0.832172	0.20559	0.986776	0.207303	0.207303	turquoise
TFCP2L1	0.0924087	-0.0396318	-0.0787022	-0.0332013	-0.0764661	-0.0523972	-0.151394	0.151394	0.0893613	0.467049	0.14819	0.542385	0.160097	0.336134	0.00521766	0.00521766	grey
BORCS5	0.0264987	0.00409591	0.0270489	0.023557	-0.042098	0.0324239	-0.0592567	0.0592567	0.626842	0.940107	0.6197	0.665605	0.439767	0.551884	0.276613	0.276613	midnightblue
HIGD1A	-0.0415784	0.0110142	0.0614126	0.0548787	-0.0306263	0.0420907	-0.178666	0.178666	0.445439	0.839878	0.259483	0.313718	0.574157	0.439847	0.000952944	0.000952944	grey
FOXRED1	-0.0399946	0.119444	-0.0144794	-0.0541563	-0.0292855	-0.00729813	-0.253967	0.253967	0.462978	0.0278811	0.790529	0.32014	0.591042	0.893499	2.17283e-06	2.17283e-06	blue
TMCO6	0.0582005	0.0536054	-0.0740665	0.044537	0.0421021	0.103654	-0.036003	0.036003	0.28528	0.325095	0.173659	0.413706	0.439723	0.0565769	0.508835	0.508835	blue
SKP1	0.0177317	-0.104134	0.0807186	0.118101	-0.017789	0.035825	0.125506	-0.125506	0.744958	0.0554365	0.138043	0.0297007	0.744162	0.510935	0.0208097	0.0208097	turquoise
CEP70	0.0573835	0.0855237	-0.00463222	-0.0091353	-0.0888995	-0.0476659	-0.173096	0.173096	0.292108	0.116015	0.932282	0.866913	0.102258	0.38164	0.00137695	0.00137695	turquoise
CXCL9	0.0363516	0.0827321	0.15741	0.0194565	0.0327756	0.0903436	0.00846192	-0.00846192	0.504738	0.12845	0.00366495	0.721134	0.547577	0.0967825	0.876642	0.876642	tan
DPY19L1	0.0426072	0.0414045	0.157715	0.0949697	0.0511988	0.0994122	-0.120191	0.120191	0.43425	0.447346	0.00359869	0.0807992	0.347318	0.067528	0.0269109	0.0269109	turquoise
HLA-F	0.0819568	0.105778	-0.00341395	0.0426841	-0.0545448	0.0586422	-0.0534278	0.0534278	0.132081	0.0516719	0.950065	0.43342	0.316676	0.281633	0.326702	0.326702	grey
NEK8	0.0608228	-0.00388742	0.0573598	0.0487889	0.106303	0.0968767	-0.175865	0.175865	0.264095	0.94315	0.292308	0.370512	0.0505176	0.0748644	0.00114827	0.00114827	red
LGALS2	0.0587925	-0.0300563	-0.0355419	-0.0791103	-0.0213552	-0.0559327	0.0399037	-0.0399037	0.280401	0.581307	0.514282	0.146092	0.695218	0.304501	0.463996	0.463996	grey
CWC25	-0.0247662	0.0693108	-0.0381304	-0.0179014	0.0508058	0.0078555	-0.125822	0.125822	0.649555	0.20303	0.484104	0.742603	0.351036	0.885419	0.0204876	0.0204876	grey
MYZAP	0.106761	0.0146226	-0.103726	-0.0269185	-0.059303	-0.0737048	-0.139282	0.139282	0.0495255	0.788507	0.0564045	0.62139	0.276238	0.175775	0.010243	0.010243	grey
CARS	-0.0366762	0.12968	0.0825326	-0.0175405	0.0290476	0.0388789	-0.100709	0.100709	0.500939	0.0168969	0.129377	0.747614	0.594061	0.47556	0.0640089	0.0640089	blue
ZNF148	-0.00738814	-0.00420195	0.189952	0.0902225	-0.0122814	0.125406	-0.0517616	0.0517616	0.892193	0.938559	0.000437202	0.0972325	0.821747	0.0209118	0.342036	0.342036	turquoise
TRIM7	-0.0927899	0.117602	0.0752725	-0.0469906	-0.0632478	0.0540111	-0.0908511	0.0908511	0.0880426	0.0304026	0.166739	0.388429	0.245489	0.321441	0.0949149	0.0949149	grey
PLK2	0.0173032	0.0474301	0.0177954	-0.00452016	0.0452916	-0.0111239	0.0811368	-0.0811368	0.750915	0.384003	0.744073	0.933917	0.40583	0.838305	0.136007	0.136007	grey
GON4L	0.0719409	0.0182383	0.0519603	0.101679	0.0677104	0.0913478	-0.0591225	0.0591225	0.18637	0.737935	0.340185	0.0614776	0.213682	0.0931147	0.277705	0.277705	turquoise
TPPP3	0.0592074	0.0571795	-0.0260252	-0.128397	0.0689755	-0.0524079	0.0339709	-0.0339709	0.277014	0.29383	0.633017	0.0180248	0.205229	0.336035	0.53306	0.53306	grey
LONP1	-0.0387847	0.0547095	0.0835395	-0.0698648	0.0232243	0.0247365	-0.129736	0.129736	0.47663	0.315215	0.124752	0.199435	0.670047	0.649948	0.0168491	0.0168491	blue
AKR1B10	0.0297231	-0.0803906	-0.0943099	0.063412	-0.0897653	0.0198406	-0.233756	0.233756	0.585507	0.139656	0.0829391	0.244263	0.0989464	0.715865	1.37135e-05	1.37135e-05	grey
MYO5B	0.0174195	0.13243	0.0764714	-0.0318254	-0.00959207	0.00328962	-0.282932	0.282932	0.749297	0.0146854	0.160067	0.559253	0.860325	0.951881	1.16606e-07	1.16606e-07	turquoise
SMG8	-0.0271332	0.017967	0.0507818	0.024962	0.0445757	0.033812	-0.0373925	0.0373925	0.61861	0.741692	0.351264	0.646972	0.413299	0.534979	0.492608	0.492608	turquoise
C1QL3	0.0192165	0.0420287	0.0701843	0.00370006	-0.0485577	0.0215155	-0.0904626	0.0904626	0.724435	0.440521	0.197381	0.945886	0.372787	0.693046	0.0963422	0.0963422	grey
CACNA2D1	-0.0361496	-0.123395	0.100396	0.0771584	0.0171333	-0.0760132	0.28626	-0.28626	0.507111	0.0230714	0.0648434	0.156336	0.753282	0.162593	8.14902e-08	8.14902e-08	brown
PTPRZ1	0.0193069	-0.0191254	0.0232096	-0.0619093	-0.0164324	-0.0829319	0.00155898	-0.00155898	0.72319	0.725688	0.670244	0.255642	0.763067	0.127527	0.977185	0.977185	grey
PET117	0.04177	0.0251096	0.138397	0.00870427	-0.0894851	0.0480104	-0.134452	0.134452	0.443343	0.645027	0.0107404	0.873138	0.100009	0.378205	0.0132254	0.0132254	grey
SLC27A3	0.12406	-0.0284823	-0.0686848	0.031644	-0.0152872	-0.0474999	0.0290129	-0.0290129	0.0223369	0.601265	0.20715	0.561496	0.779137	0.383303	0.594502	0.594502	grey
TEF	0.0223353	-0.103194	0.0095424	0.0753195	-0.00581888	0.0759376	0.20334	-0.20334	0.681976	0.0576882	0.861041	0.166474	0.914994	0.163013	0.00016357	0.00016357	brown
DESI1	-0.117026	0.0688491	-0.00369993	-0.128383	0.0370841	0.00244586	-0.0696499	0.0696499	0.0312304	0.206063	0.945888	0.0180376	0.496186	0.964213	0.200824	0.200824	blue
RBSN	-0.0382741	-0.103497	0.12577	0.0763333	0.029082	0.0874587	0.196927	-0.196927	0.482458	0.0569541	0.0205412	0.160826	0.593625	0.107962	0.000264075	0.000264075	turquoise
ITGA10	-0.0765615	0.0076934	0.0344342	-0.0189626	-0.0192715	0.00136598	0.0870266	-0.0870266	0.159574	0.887768	0.527488	0.72793	0.723677	0.980009	0.109721	0.109721	grey
PXYLP1	-0.0536845	0.0185492	0.103645	-0.00539389	-0.0624205	-0.00407964	0.0809673	-0.0809673	0.32438	0.733634	0.056598	0.921181	0.25173	0.940344	0.136829	0.136829	turquoise
LEAP2	0.0751213	-0.0270752	-0.0653803	0.0492282	-0.0307905	0.0492893	-0.127766	0.127766	0.167595	0.61936	0.2299	0.366214	0.572105	0.365619	0.0186034	0.0186034	grey
ODF2	-8.5009e-05	0.104698	0.0164672	-0.0416293	-0.00500465	0.035173	-0.139888	0.139888	0.998756	0.0541212	0.762581	0.444881	0.926853	0.518661	0.00991442	0.00991442	blue
PXDN	0.0725438	0.00927986	0.0704226	0.0284998	-0.0262364	0.031236	0.405148	-0.405148	0.182697	0.864827	0.195861	0.60104	0.63026	0.566556	7.99718e-15	7.99718e-15	yellow
PCDHGA10	0.0559676	0.0527393	-0.0204592	-0.0382393	-0.0472635	0.00853315	0.0594187	-0.0594187	0.304198	0.332984	0.707406	0.482857	0.385676	0.875612	0.2753	0.2753	purple
NFKBIE	0.0996951	0.135143	-0.0746396	-0.106238	-0.023783	-0.0566518	-0.0205454	0.0205454	0.0667473	0.0127564	0.170345	0.0506586	0.662594	0.298315	0.70623	0.70623	grey60
SENP6	0.014283	0.0231505	0.211226	0.112313	-0.0021491	0.108539	-0.0470968	0.0470968	0.793306	0.671035	8.89063e-05	0.0387517	0.968553	0.0458326	0.387356	0.387356	turquoise
MACROD1	-0.0211831	0.104636	-0.0320925	-0.0950191	0.0410122	-0.0346846	-0.112973	0.112973	0.697554	0.054264	0.555959	0.0806409	0.451665	0.524487	0.0376138	0.0376138	grey
TSPAN8	-0.015442	0.0378004	0.0480141	0.080477	-0.0407796	0.0632546	-0.17879	0.17879	0.776959	0.487898	0.378169	0.13923	0.454237	0.245437	0.000945077	0.000945077	grey
USP30	0.0701631	-0.0898188	0.0398539	-0.0241268	0.0268355	0.0336552	-0.00165205	0.00165205	0.197518	0.0987448	0.464554	0.658023	0.622467	0.536876	0.975824	0.975824	turquoise
APMAP	0.0761848	0.107931	0.0414364	-0.0167627	-0.0404042	-0.00324506	-0.0818571	0.0818571	0.161644	0.0470678	0.446995	0.758451	0.458405	0.952532	0.132554	0.132554	blue
CTNNAL1	-0.0220062	-0.122091	0.126973	-0.0146812	0.0163046	0.0628501	0.121015	-0.121015	0.686412	0.0245738	0.0193529	0.78768	0.764856	0.248475	0.0258751	0.0258751	brown
OXLD1	0.0247948	0.103408	-0.13128	-0.0436636	0.00659618	-0.0447736	-0.0627058	0.0627058	0.649178	0.05717	0.0155771	0.422932	0.90369	0.411226	0.249565	0.249565	grey
TSEN2	-0.0288172	0.0848717	0.101884	0.0950173	0.0194767	0.105204	-0.222509	0.222509	0.596993	0.118832	0.0609538	0.0806466	0.720857	0.0529626	3.57092e-05	3.57092e-05	turquoise
SCAMP3	-0.0308654	-0.0190153	-0.113985	-0.0681993	0.0252682	-0.0589706	-0.116385	0.116385	0.571171	0.727204	0.0359254	0.210387	0.64294	0.278944	0.0321741	0.0321741	blue
BEGAIN	-0.115336	0.0453344	-0.00492166	0.120764	0.00621359	0.161595	-0.00231509	0.00231509	0.0337704	0.405386	0.928062	0.0261872	0.909251	0.00284573	0.966126	0.966126	cyan
ZSCAN5A	0.0605356	0.0274811	-0.05357	0.0405182	-0.03366	-0.0430595	-0.118588	0.118588	0.266361	0.614116	0.325415	0.457137	0.536818	0.429383	0.0290295	0.0290295	blue
ANKRD6	-0.0376886	-0.142449	0.0644347	0.0827719	0.0811654	0.0573841	0.267712	-0.267712	0.489187	0.00862703	0.236723	0.128266	0.135868	0.292103	5.65912e-07	5.65912e-07	yellow
GNAI1	0.00361859	-0.0543296	0.030089	0.0527736	0.0441355	-0.0248734	0.260785	-0.260785	0.947076	0.318591	0.580896	0.332669	0.417932	0.648141	1.12545e-06	1.12545e-06	brown
IRGQ	0.0521471	0.00737931	0.0638391	0.062747	-0.0123177	0.0455956	-0.0113409	0.0113409	0.338449	0.892321	0.241094	0.249254	0.82123	0.402683	0.835195	0.835195	turquoise
ARL2	-0.00861109	-0.058323	-0.0200859	-0.0839968	0.0419821	0.00329016	0.257283	-0.257283	0.874485	0.284266	0.712507	0.122694	0.441029	0.951873	1.58153e-06	1.58153e-06	grey
TTC33	-0.0536623	0.0165396	0.0786784	-0.0548754	-0.0456078	-0.0215383	0.0305497	-0.0305497	0.324581	0.761568	0.148313	0.313747	0.402557	0.692737	0.575116	0.575116	turquoise
ADAP2	-0.0196288	-0.038763	0.221102	0.119899	0.0777797	0.076268	0.375364	-0.375364	0.718769	0.476877	4.01156e-05	0.0272866	0.153018	0.161185	8.75757e-13	8.75757e-13	magenta
DSC3	-0.0196641	-0.00922097	-0.161484	-0.0693426	-0.0147066	-0.0687851	-0.045702	0.045702	0.718285	0.865677	0.00286511	0.202823	0.78732	0.206486	0.401585	0.401585	pink
BMP8B	-0.0513762	0.113161	0.0373934	-0.0107844	-0.0165492	0.0656448	-0.0498394	0.0498394	0.345648	0.0372949	0.492598	0.843175	0.761434	0.228016	0.360286	0.360286	turquoise
STIM1	0.0466423	-0.0697582	0.0381455	-0.00891468	-0.0131065	0.041391	0.0999528	-0.0999528	0.391959	0.200123	0.483931	0.870098	0.809994	0.447493	0.0660427	0.0660427	turquoise
IFI16	-0.045948	0.00567116	0.183055	0.0780793	0.0682381	0.0529579	0.208856	-0.208856	0.399053	0.917144	0.000707597	0.151437	0.210126	0.330981	0.000107039	0.000107039	green
TNS4	0.000790022	0.0237235	0.0140794	-0.0857978	0.0214107	0.00657881	-0.114972	0.114972	0.988437	0.663385	0.796188	0.114846	0.694466	0.903942	0.0343402	0.0343402	grey
PPIF	0.0436367	-0.0114553	-0.0472051	0.104199	0.0065358	0.0468565	-0.224624	0.224624	0.423218	0.833557	0.386265	0.0552846	0.904567	0.389786	2.99352e-05	2.99352e-05	blue
BRD1	0.0255693	-0.0182008	0.0545791	0.0560563	0.0300917	0.0717686	-0.0769736	0.0769736	0.638985	0.738453	0.316371	0.303431	0.580862	0.18743	0.157333	0.157333	turquoise
EIF4A1	-0.0455974	0.152394	0.0196534	0.052536	-0.0167058	0.0291378	-0.0713035	0.0713035	0.402664	0.00492426	0.718432	0.334854	0.759246	0.592916	0.190313	0.190313	turquoise
DOCK9	0.0932169	0.00964666	0.0679724	-0.0104334	0.00803102	0.0188726	-0.0101833	0.0101833	0.086584	0.859538	0.211911	0.848217	0.882877	0.729171	0.851812	0.851812	turquoise
ARHGAP31	0.0232926	-0.0739595	0.161238	0.0732396	0.0248433	0.0617981	0.45763	-0.45763	0.669135	0.174283	0.00290848	0.178525	0.648538	0.256498	5.97025e-19	5.97025e-19	yellow
ARHGEF25	-0.0608529	-0.170399	0.118957	0.0446449	0.0200404	0.0168314	0.47896	-0.47896	0.263858	0.00163918	0.0285298	0.412575	0.713129	0.757492	7.65103e-21	7.65103e-21	brown
DIS3	0.0519348	0.045973	0.101618	0.0328535	-0.00929507	0.0691304	-0.177321	0.177321	0.340421	0.398797	0.0616343	0.546624	0.864608	0.204211	0.00104251	0.00104251	black
UAP1L1	-0.0300918	0.0783031	0.0746815	-0.0856321	-0.0358054	0.0148826	-0.0370369	0.0370369	0.580861	0.150264	0.170104	0.115552	0.511166	0.784837	0.496735	0.496735	grey
NEURL1	0.0868637	-0.101259	-0.0627494	-0.0102435	-0.0271407	-0.0377351	0.0392368	-0.0392368	0.11039	0.0625651	0.249236	0.850947	0.618512	0.488651	0.471504	0.471504	darkturquoise
PI3	-0.0633151	-0.00928194	-0.0135517	0.0717768	0.0334855	0.0361619	-0.132133	0.132133	0.244986	0.864797	0.803667	0.187379	0.538933	0.506966	0.0149112	0.0149112	pink
GTF3C2	0.0315402	0.0938772	0.000849142	0.081523	0.0514909	0.0750165	-0.234707	0.234707	0.562781	0.084367	0.987572	0.134147	0.344571	0.168191	1.26192e-05	1.26192e-05	blue
FCRL2	-0.048835	-0.076812	0.0474849	0.0703472	0.0386109	0.0467423	0.150398	-0.150398	0.37006	0.158209	0.383452	0.196341	0.47861	0.390944	0.00552525	0.00552525	green
URI1	0.0347918	0.00674513	-0.0831884	0.0114851	-0.0489477	-0.010585	-0.0324338	0.0324338	0.523205	0.901526	0.12635	0.83313	0.368955	0.846038	0.551762	0.551762	salmon
UBALD1	-0.0962296	0.00155313	-0.0362863	-0.0206013	-0.030373	-0.00916072	0.120626	-0.120626	0.0768374	0.977271	0.505505	0.705468	0.577329	0.866546	0.0263592	0.0263592	grey
USP12	-0.0752898	0.00914271	0.11512	0.0527541	0.0157515	0.0777245	-0.0457189	0.0457189	0.166642	0.866806	0.0341068	0.332849	0.77261	0.153311	0.401411	0.401411	turquoise
OR2I1P	0.0343031	0.0810772	0.127828	0.0189062	0.0532654	0.0743415	0.0263693	-0.0263693	0.529061	0.136296	0.0185459	0.728707	0.328178	0.172063	0.628528	0.628528	tan
OS9	0.0987205	0.0424394	0.0319364	0.0573022	-0.0388938	0.051174	0.0610746	-0.0610746	0.0694687	0.436064	0.557882	0.292793	0.47539	0.347552	0.262119	0.262119	turquoise
RPUSD3	-0.141071	0.0652781	-0.105956	-0.121465	-0.0331872	-0.0370594	-0.127804	0.127804	0.00930023	0.23063	0.0512783	0.0253235	0.542556	0.496473	0.0185679	0.0185679	blue
ADRB1	0.0573817	0.0984553	-0.029921	-0.147804	0.0762537	-0.0216473	-0.00428257	0.00428257	0.292123	0.0702246	0.58301	0.00640481	0.161264	0.691261	0.937383	0.937383	grey
MSX2	-0.00333486	0.0243322	-0.0446687	-0.0958768	-0.0367222	0.000227076	-0.0551776	0.0551776	0.95122	0.655298	0.412324	0.0779307	0.500402	0.996676	0.311086	0.311086	greenyellow
RNF214	0.0117718	0.00991171	0.0881655	0.060901	-0.0555397	0.114442	-0.110562	0.110562	0.829027	0.855721	0.105134	0.263481	0.307916	0.0351836	0.0419123	0.0419123	blue
HDAC2	-0.0194967	0.0323622	0.0440308	0.0198392	0.015803	0.0690091	-0.20698	0.20698	0.720583	0.552642	0.419038	0.715884	0.771886	0.205009	0.000123805	0.000123805	blue
AAMDC	0.021589	0.0136257	0.0311687	-0.0244984	-0.0442924	0.0148787	0.0933622	-0.0933622	0.692051	0.802618	0.567393	0.653096	0.416278	0.784892	0.0860923	0.0860923	grey
ALKBH8	0.0103459	0.0220289	0.140519	0.138903	-0.0237778	0.121138	-0.0551013	0.0551013	0.849474	0.686105	0.00958259	0.0104534	0.662663	0.0257227	0.311756	0.311756	turquoise
ZNF213	0.0398568	-0.0137159	0.000825657	0.0132272	0.0838693	0.0235933	-0.0105787	0.0105787	0.464522	0.801339	0.987916	0.808276	0.123266	0.665121	0.846128	0.846128	turquoise
SRRD	-0.0106824	-0.0633793	0.0603104	-5.29804e-06	0.0246625	0.00858476	0.129354	-0.129354	0.844639	0.244506	0.268147	0.999923	0.650925	0.874865	0.0171773	0.0171773	turquoise
CLSTN1	0.0989516	0.0320213	-0.0172296	0.0754721	0.0637021	0.0817195	0.00224694	-0.00224694	0.0688151	0.556836	0.75194	0.165614	0.242107	0.133208	0.967122	0.967122	turquoise
EHBP1L1	-0.0259578	-0.031094	0.147052	0.101325	0.0516853	0.0814768	0.198573	-0.198573	0.633897	0.568322	0.00668226	0.062391	0.342749	0.134368	0.00023385	0.00023385	brown
PCDH12	0.0737789	0.0418721	0.112667	0.036898	0.0469982	0.0275648	0.34448	-0.34448	0.17534	0.442228	0.0381392	0.498352	0.388352	0.613037	7.04286e-11	7.04286e-11	yellow
PLSCR4	-0.035713	-0.10075	0.195267	0.0823581	0.029839	0.0287699	0.479888	-0.479888	0.512258	0.0638999	0.000298208	0.130192	0.584044	0.597595	6.28593e-21	6.28593e-21	yellow
ERBB3	0.063612	0.0707866	0.04059	0.0557262	0.0483944	0.110458	-0.250016	0.250016	0.242775	0.193554	0.456339	0.306292	0.374399	0.042107	3.15441e-06	3.15441e-06	darkgrey
RGL1	0.0107588	-0.0678338	0.112772	0.0482019	0.0287966	-0.0639015	0.322607	-0.322607	0.843542	0.212847	0.0379573	0.376304	0.597255	0.240633	1.19262e-09	1.19262e-09	brown
RARB	0.0754824	-0.156287	0.0611561	0.078738	-0.0342724	0.0259612	0.219223	-0.219223	0.165556	0.00391838	0.261482	0.148005	0.529431	0.633853	4.68044e-05	4.68044e-05	grey
ZNF583	-0.0612307	-0.0792964	0.0642631	-0.0166185	0.0330269	-0.0367099	0.220545	-0.220545	0.260899	0.145143	0.237977	0.760465	0.544509	0.500546	4.19978e-05	4.19978e-05	brown
BLVRB	-0.0753776	-0.0656472	-0.07216	0.0152106	0.0120017	0.0113979	-0.0698025	0.0698025	0.166146	0.227999	0.185029	0.780216	0.825741	0.834379	0.199836	0.199836	grey
UNC119B	0.0893781	-0.151611	0.0228232	-0.000805594	-0.00135554	0.0544426	-0.0414554	0.0414554	0.100417	0.00515259	0.67542	0.988209	0.980162	0.317585	0.446787	0.446787	turquoise
SATB1	-0.065151	-0.0819185	0.168055	0.130465	0.0389594	0.0351896	0.26789	-0.26789	0.231542	0.132263	0.00190343	0.0162381	0.474645	0.518463	5.55869e-07	5.55869e-07	brown
FAM81A	0.0113117	0.00712619	0.0770313	-0.0489126	-0.000489336	0.0410588	-0.182355	0.182355	0.835613	0.895994	0.157021	0.369299	0.992838	0.451151	0.000742335	0.000742335	darkred
SIK1B	0.0206427	-0.0538447	0.0593862	0.051475	-0.0466423	0.107621	0.0710614	-0.0710614	0.704904	0.322936	0.275564	0.34472	0.39196	0.0477098	0.191826	0.191826	grey
IRF8	-0.0253138	0.0556268	0.166907	0.0827459	0.100382	0.100069	-0.0818648	0.0818648	0.642339	0.307157	0.00204663	0.128387	0.064881	0.0657267	0.132517	0.132517	green
PRKDC	0.0293269	0.0497805	0.0541372	0.0112396	-0.0232082	0.0391069	-0.190553	0.190553	0.590517	0.360855	0.320311	0.836647	0.670262	0.472973	0.000418901	0.000418901	turquoise
TGM1	0.0319267	-0.0220601	-0.157172	-0.06485	-0.0304256	-0.0669462	-0.0822807	0.0822807	0.558002	0.685685	0.00371735	0.233709	0.57667	0.218908	0.130555	0.130555	pink
KDM3A	-0.0189553	0.0152477	0.135766	0.0519451	-0.0310339	0.088395	-0.117241	0.117241	0.728031	0.779692	0.0123463	0.340325	0.56907	0.104228	0.0309191	0.0309191	turquoise
ZNF585A	0.0260477	-0.0221839	0.0616797	-0.0332326	0.0497173	0.0100456	0.121671	-0.121671	0.632722	0.684016	0.257413	0.542004	0.361465	0.853793	0.025074	0.025074	turquoise
IGSF10	0.00582227	-0.0974635	-0.00319882	-0.0011307	-0.037889	-0.0849171	0.124558	-0.124558	0.914944	0.0731113	0.953208	0.983452	0.486878	0.118634	0.0218005	0.0218005	midnightblue
PEMT	-0.0765699	0.159074	-0.0345971	-0.0306398	-0.0307527	-0.052517	-0.0462678	0.0462678	0.159528	0.00331648	0.525535	0.573989	0.572577	0.335029	0.395776	0.395776	blue
ANGEL1	0.0461922	0.0227497	0.0257537	-0.01915	0.0286805	0.0305469	-0.0823242	0.0823242	0.396549	0.676406	0.636567	0.725349	0.598734	0.575151	0.130351	0.130351	blue
SOX2	0.0895828	-0.0131638	-0.103985	-0.113083	-0.0670926	-0.111885	-0.0572872	0.0572872	0.0996375	0.809178	0.0557885	0.0374284	0.2179	0.0395055	0.29292	0.29292	orange
PHC1	-0.0347705	-0.134234	0.0889536	0.0556626	0.0283556	0.0604353	0.317622	-0.317622	0.52346	0.0133768	0.102049	0.306846	0.602883	0.267156	2.20341e-09	2.20341e-09	brown
POLR2J3	0.139442	-0.0399465	0.0660903	0.108175	0.0584031	0.0489733	0.0510283	-0.0510283	0.0101555	0.463516	0.224868	0.0465696	0.283604	0.368705	0.348928	0.348928	grey
RSPH14	0.0622044	-0.0265702	-0.0426659	-0.0427361	0.0033238	-0.0111098	0.0563429	-0.0563429	0.253379	0.625913	0.433617	0.43286	0.951382	0.838507	0.300962	0.300962	grey
SUSD3	-0.0559937	-0.0545563	0.0994661	0.0541564	-0.0153302	0.0875457	0.0943747	-0.0943747	0.303973	0.316574	0.0673789	0.320139	0.778532	0.107611	0.0827268	0.0827268	green
FAM72B	-0.095919	0.0245655	0.00824918	-0.0560621	-0.0268861	0.026458	-0.168843	0.168843	0.077799	0.652208	0.879719	0.303381	0.62181	0.627372	0.00181054	0.00181054	blue
PI4KA	0.0685125	-0.0225939	0.101698	0.0243722	0.0222691	0.0816004	-0.00575869	0.00575869	0.208294	0.678497	0.0614298	0.654768	0.682867	0.133777	0.91587	0.91587	turquoise
PICALM	-0.0368905	0.047702	0.156788	0.092623	0.0397438	0.0910367	0.045113	-0.045113	0.498439	0.381279	0.00380326	0.088618	0.46579	0.0942389	0.407687	0.407687	turquoise
EIF4H	0.0466471	0.00738845	-0.0119126	-0.0264397	0.00276382	0.00952995	-0.0543625	0.0543625	0.39191	0.892189	0.827015	0.62761	0.959565	0.86122	0.318298	0.318298	blue
SCRN1	0.0158836	-0.0682588	0.0987067	0.0658863	-0.0473977	0.0185895	0.0650851	-0.0650851	0.770756	0.209988	0.0695076	0.226306	0.384327	0.733078	0.232015	0.232015	turquoise
SNRPE	-0.0668762	-0.00134895	0.0894035	0.0670049	0.00652272	0.0787415	-0.191033	0.191033	0.219391	0.980258	0.10032	0.218503	0.904757	0.147987	0.00040482	0.00040482	blue
ST6GALNAC6	-0.0613254	-0.14969	0.0798114	0.0108779	-0.0186603	0.00442998	0.517945	-0.517945	0.260161	0.00575387	0.14254	0.841833	0.7321	0.935232	1.15757e-24	1.15757e-24	yellow
FABP4	-0.0714286	-0.0939307	0.0366669	0.0921436	-0.00467961	0.0450186	0.22736	-0.22736	0.189534	0.0841893	0.501048	0.0902876	0.931591	0.408669	2.37719e-05	2.37719e-05	yellow
C2CD2	-0.0321464	0.0305454	0.171775	0.0854174	0.0645352	0.0941546	0.132406	-0.132406	0.555295	0.57517	0.00150015	0.116471	0.235991	0.0834492	0.0147038	0.0147038	turquoise
SUMO2	-0.055663	0.0356576	0.0464037	-0.0260299	-0.000792487	-0.0306655	-0.0468761	0.0468761	0.306842	0.512912	0.394389	0.632955	0.988401	0.573667	0.389588	0.389588	blue
DDX3Y	0.59523	-0.0807904	0.0679642	0.0880798	0.0305391	-0.0362231	0.166163	-0.166163	7.09842e-34	0.137692	0.211967	0.105473	0.575249	0.506247	0.00214458	0.00214458	grey
ARHGAP33	0.0209205	0.129578	-0.0538049	0.000896757	0.0485171	-0.00413024	-0.096377	0.096377	0.701122	0.0169843	0.323295	0.986875	0.373187	0.939606	0.0763843	0.0763843	blue
ELN	0.0229802	-0.147676	0.129974	0.0399656	-0.0299352	0.0192414	0.516198	-0.516198	0.673315	0.00645128	0.0166478	0.463303	0.582833	0.724091	1.75964e-24	1.75964e-24	yellow
TRAPPC10	0.00962511	0.0540267	0.0715691	0.0424163	0.0563724	0.0958953	-0.0479295	0.0479295	0.859849	0.321302	0.188663	0.436314	0.300708	0.077873	0.37901	0.37901	turquoise
IL9R	0.0659636	-0.0273137	0.151202	0.0351318	0.0011685	0.0680972	0.179384	-0.179384	0.225761	0.616276	0.00527584	0.519151	0.982899	0.211072	0.000908091	0.000908091	tan
TGS1	-0.0345342	0.107146	0.0688207	-0.0118926	-0.0691341	0.0146431	-0.232277	0.232277	0.526288	0.0487064	0.206251	0.827301	0.204187	0.788217	1.55959e-05	1.55959e-05	turquoise
NAGK	-0.0109782	-0.019231	0.00192686	-0.0126169	-0.0111603	-0.0192297	0.306312	-0.306312	0.840394	0.724234	0.971804	0.816963	0.837783	0.724253	8.51308e-09	8.51308e-09	green
HIST1H4L	-0.0833611	0.0573504	-0.0871684	-0.0785572	-0.0511743	-0.0510342	-0.0682167	0.0682167	0.125562	0.292387	0.109142	0.148942	0.347549	0.348872	0.21027	0.21027	grey
SERPINF1	0.0361247	-0.171279	0.0888087	0.02451	-0.0242564	-0.0599545	0.585049	-0.585049	0.507403	0.00154892	0.10261	0.652943	0.656302	0.270987	1.61393e-32	1.61393e-32	yellow
ATF7IP	0.0724774	-0.0688125	0.174365	0.0902313	0.000905711	0.150646	0.0248535	-0.0248535	0.183099	0.206305	0.00126737	0.0971999	0.986744	0.00544727	0.648404	0.648404	turquoise
IGIP	0.0049755	-0.147597	0.148905	0.133466	0.0322737	0.0421541	0.323274	-0.323274	0.927277	0.0064803	0.00601725	0.0139208	0.55373	0.439158	1.09753e-09	1.09753e-09	brown
CUEDC1	0.125474	-0.0086224	-0.0226826	-0.0777465	0.00444758	-0.0593118	0.189175	-0.189175	0.020842	0.874321	0.677306	0.153194	0.934975	0.276167	0.000461987	0.000461987	grey
TCEANC2	0.0382921	-0.0393958	0.0689701	0.0192946	0.0266578	0.0462173	-0.0183891	0.0183891	0.482251	0.469708	0.205265	0.723359	0.624773	0.396293	0.735847	0.735847	turquoise
CGREF1	-0.10418	-0.0177986	0.0248679	-0.00707087	-0.0284505	0.0540637	-0.0786955	0.0786955	0.0553285	0.744029	0.648213	0.896796	0.60167	0.320969	0.148225	0.148225	grey
OTUB1	-0.0626102	0.0648079	-0.134854	-0.0569742	-0.0172437	-0.0369497	-0.0816792	0.0816792	0.250289	0.234013	0.0129508	0.295569	0.751744	0.49775	0.1334	0.1334	blue
C8orf37	-0.0737617	-0.0109973	0.0639676	0.00286548	0.0116403	0.0378888	0.0387219	-0.0387219	0.175441	0.840121	0.240146	0.958079	0.830908	0.48688	0.477345	0.477345	turquoise
HS3ST2	0.0511607	-0.0613099	0.0704131	-0.000699856	0.029106	0.020122	0.128311	-0.128311	0.347677	0.260282	0.195921	0.989757	0.593319	0.712012	0.0181032	0.0181032	grey
DTX3L	-0.0593116	0.0908844	0.189937	0.0356521	-0.00223328	0.127072	-0.112262	0.112262	0.276168	0.0947931	0.000437675	0.512978	0.967322	0.0192585	0.0388415	0.0388415	turquoise
B3GNT3	0.0858973	0.12494	-0.0269522	-0.0337585	0.0305374	0.0269726	-0.244349	0.244349	0.114425	0.0213967	0.620954	0.535627	0.57527	0.62069	5.32646e-06	5.32646e-06	grey
PPP1R2	0.0736623	-0.0598367	0.0914503	-0.0149054	0.0120713	-0.0413048	-0.00480129	0.00480129	0.176025	0.271931	0.0927467	0.784515	0.824747	0.448441	0.929817	0.929817	turquoise
FLT3LG	-0.0416761	-0.153935	0.159584	0.0400856	0.0284877	0.0501474	0.384833	-0.384833	0.444369	0.00450115	0.00321599	0.461959	0.601194	0.357321	2.07118e-13	2.07118e-13	green
KIAA1191	-0.0149115	0.0305315	0.0342787	0.0166149	0.0953705	0.0188849	0.0346397	-0.0346397	0.78443	0.575344	0.529354	0.760516	0.0795212	0.729002	0.525024	0.525024	turquoise
EID1	0.00552962	-0.18447	0.0760955	0.0787563	0.0112801	-0.0514022	0.416434	-0.416434	0.919204	0.000641963	0.162137	0.147911	0.836066	0.345403	1.18868e-15	1.18868e-15	brown
SF3B5	0.00237089	-0.0231069	-0.0475481	-0.078504	-0.0415348	0.00437251	-0.0851943	0.0851943	0.96531	0.671618	0.382819	0.149218	0.445916	0.936071	0.117431	0.117431	black
CCDC153	0.0675764	-0.0973973	-0.131743	-0.0305685	0.0233033	-0.0517725	-0.0958921	0.0958921	0.214592	0.0733076	0.0152126	0.57488	0.668992	0.341935	0.0778828	0.0778828	grey
FBLN5	0.0531954	-0.138034	0.149958	0.0453854	-0.015713	0.0190867	0.530284	-0.530284	0.328814	0.0109505	0.00566633	0.404858	0.773151	0.726221	5.60276e-26	5.60276e-26	yellow
UPF1	0.0730832	0.0406079	0.0600965	0.0163411	0.0383551	0.0944693	-0.113719	0.113719	0.179457	0.456141	0.269851	0.764344	0.481531	0.0824181	0.0363629	0.0363629	turquoise
MPL	0.0173208	-0.139097	-0.000262723	0.0252002	-0.0157428	0.0126478	0.100837	-0.100837	0.75067	0.0103455	0.996155	0.643834	0.772732	0.816522	0.0636703	0.0636703	black
NME6	-0.0356634	-0.00226915	0.0595781	0.00332787	0.00922802	0.0772826	-0.123652	0.123652	0.512843	0.966797	0.274012	0.951322	0.865575	0.155668	0.022786	0.022786	turquoise
NUP58	-0.0312543	0.104099	0.127407	0.023936	-0.0101913	0.12136	-0.268051	0.268051	0.566328	0.0555201	0.0189395	0.660558	0.851698	0.0254507	5.46898e-07	5.46898e-07	blue
CNOT6	0.00543982	0.0687998	0.148617	0.102411	0.0261789	0.158859	-0.166549	0.166549	0.920512	0.206389	0.00611648	0.0596227	0.631009	0.0033597	0.00209315	0.00209315	turquoise
FAM83D	-0.0334047	-0.113908	0.048029	0.00568079	-0.0322575	-0.0221458	0.282688	-0.282688	0.539913	0.0360505	0.37802	0.917004	0.553929	0.684529	1.1968e-07	1.1968e-07	brown
TTC12	0.0655337	0.0765934	0.0463307	-0.0213302	-0.0162199	0.0434497	-0.1937	0.1937	0.228806	0.1594	0.395134	0.695557	0.766042	0.42521	0.000334171	0.000334171	turquoise
NAAA	0.0272227	0.044014	-0.00053777	-0.0360392	-0.0287238	-0.0190648	-0.0352823	0.0352823	0.617453	0.419216	0.992129	0.50841	0.598182	0.726522	0.517361	0.517361	grey
TRMT61A	-0.00775302	0.0422269	-0.00551004	0.0111159	0.0187929	0.0548437	-0.0954333	0.0954333	0.886904	0.438368	0.91949	0.83842	0.73027	0.314027	0.0793226	0.0793226	darkgreen
FKBP8	0.00627094	-0.00709646	-0.0997126	-0.0924092	-0.0113889	-0.0668516	0.159772	-0.159772	0.908417	0.896425	0.0666993	0.0893595	0.834507	0.219561	0.00317967	0.00317967	grey
CAMK2D	0.0394008	0.00243488	0.0680047	-0.00457225	-0.00490742	-0.0452434	-0.128253	0.128253	0.469651	0.964374	0.211694	0.933157	0.92827	0.406331	0.0181554	0.0181554	turquoise
AL645941.2	2.60208e-05	-0.00111345	0.127169	0.0678455	0.0305831	0.101422	0.00992964	-0.00992964	0.999619	0.983704	0.0191654	0.212768	0.574697	0.0621405	0.855462	0.855462	green
RHOF	-0.0841634	0.0152667	0.0423767	0.0401181	-0.00257544	0.0673926	-0.0297748	0.0297748	0.121952	0.779426	0.436743	0.461597	0.962319	0.215845	0.584854	0.584854	grey
SLC35E1	0.0591936	0.041429	0.0682384	0.0569427	0.0939028	0.0797794	-0.0320976	0.0320976	0.277126	0.447077	0.210125	0.295837	0.0842819	0.142701	0.555896	0.555896	turquoise
CCDC82	0.0572307	0.0699349	0.119009	0.0430859	-0.0216161	0.0459228	0.0556027	-0.0556027	0.293397	0.198983	0.0284605	0.4291	0.691685	0.399312	0.307367	0.307367	turquoise
TMEM178A	0.0365743	0.0381269	-0.0102631	-0.035942	0.018186	-0.0506348	0.160005	-0.160005	0.50213	0.484145	0.850664	0.509555	0.738658	0.352662	0.00313508	0.00313508	orange
C19orf53	-0.019996	-0.0399433	-0.158299	-0.137331	0.000978746	-0.112482	0.0602765	-0.0602765	0.713737	0.463552	0.0034749	0.0113675	0.985676	0.0384579	0.268417	0.268417	grey
ZAP70	0.0155012	-0.0378558	0.127328	0.0791271	0.0299938	0.0990546	0.154127	-0.154127	0.776127	0.48726	0.0190141	0.146006	0.582094	0.0685257	0.00445072	0.00445072	green
TMEM14A	-0.00269917	0.0860415	-0.094915	-0.0318571	-0.0474212	-0.064218	-0.247715	0.247715	0.96051	0.113815	0.0809749	0.558862	0.384092	0.238307	3.90793e-06	3.90793e-06	grey
RBP7	-0.0834083	-0.113094	0.0326523	0.0584689	0.0399502	0.0113679	0.309968	-0.309968	0.125348	0.0374087	0.549085	0.283061	0.463475	0.834808	5.5346e-09	5.5346e-09	yellow
TBC1D22B	0.0355592	0.137639	-0.10223	-0.0199818	0.00593092	-0.0501048	-0.13877	0.13877	0.514077	0.0111829	0.0600768	0.713931	0.913363	0.357731	0.0105281	0.0105281	grey60
CYC1	-0.0804601	0.139457	-0.0756098	-0.0479808	-0.0657812	-0.0359467	-0.252757	0.252757	0.139313	0.0101477	0.164842	0.378499	0.227049	0.509499	2.43723e-06	2.43723e-06	blue
BRD7	0.0651236	0.0275628	0.0271705	-0.0483955	0.0382183	0.00335419	-0.0372528	0.0372528	0.231738	0.613063	0.618128	0.374387	0.483097	0.950938	0.494227	0.494227	lightcyan
SEPHS1	-0.00921059	0.0484678	0.11164	-0.00739372	0.0189942	0.0804934	-0.112376	0.112376	0.865826	0.373674	0.0399422	0.892112	0.727495	0.139149	0.0386423	0.0386423	blue
NMD3	-0.0590359	0.0060682	0.13172	0.108682	-0.0219478	0.119626	-0.164559	0.164559	0.278411	0.911366	0.0152309	0.0455454	0.6872	0.0276426	0.0023704	0.0023704	turquoise
TMTC3	-0.0781042	-0.0188049	0.143283	0.0265593	-0.025511	0.0699212	0.0899226	-0.0899226	0.151307	0.730105	0.0082413	0.626054	0.639749	0.199071	0.0983542	0.0983542	turquoise
NTSR1	-0.00901948	-0.0418429	-0.000882084	-0.014441	-0.00727474	0.0115326	0.0619981	-0.0619981	0.868585	0.442547	0.98709	0.791072	0.893838	0.83245	0.25496	0.25496	grey
RNF6	0.00148894	0.0823869	0.109075	0.0337299	0.00902973	0.144286	-0.249614	0.249614	0.97821	0.130057	0.0447653	0.535972	0.868437	0.00779756	3.27502e-06	3.27502e-06	turquoise
TMEM64	-0.162438	0.00288213	0.127716	0.0503438	0.00050056	-0.00607082	-0.0367296	0.0367296	0.00270251	0.957836	0.0186502	0.355439	0.992674	0.911328	0.500315	0.500315	turquoise
AFTPH	0.0576354	0.0326063	0.139759	0.0795805	-0.0168533	0.0927959	-0.246132	0.246132	0.289991	0.549648	0.00998389	0.143703	0.757186	0.0880218	4.52327e-06	4.52327e-06	turquoise
RPL37	-0.0511711	-0.018645	-0.00697262	-0.0886826	-0.043805	0.0293968	0.0570707	-0.0570707	0.347579	0.732312	0.898223	0.103101	0.42143	0.589631	0.294751	0.294751	grey
HDAC7	0.086829	-0.026778	0.132031	0.0835203	0.0670611	0.141206	0.272343	-0.272343	0.110533	0.623212	0.01499	0.124839	0.218116	0.00923229	3.53517e-07	3.53517e-07	yellow
ENO3	-0.00999488	0.0627068	-0.0134665	-0.00896199	-0.0324556	0.0119151	-0.0781897	0.0781897	0.854523	0.249558	0.804877	0.869415	0.551495	0.826979	0.150858	0.150858	grey
GRHL3	0.0496079	-0.0100916	-0.161522	-0.0864681	-0.0103447	-0.0639861	-0.0809516	0.0809516	0.362525	0.853132	0.00285847	0.112028	0.849491	0.24001	0.136905	0.136905	pink
RUSC1	-0.0597514	0.0522205	-0.0216672	-0.0541665	0.0352479	-0.032239	-0.0505011	0.0505011	0.272616	0.337768	0.690992	0.320049	0.51777	0.554156	0.353936	0.353936	blue
NBDY	-0.0326177	-0.0215262	0.0188949	0.0891519	0.0229481	0.0788532	0.158639	-0.158639	0.549508	0.692902	0.728864	0.101284	0.673745	0.147412	0.00340456	0.00340456	grey
LAMTOR2	-0.122998	-0.00322836	-0.00507325	-0.0583841	0.0371378	-0.0402039	-0.0192672	0.0192672	0.0235204	0.952776	0.925853	0.283761	0.495562	0.460638	0.723736	0.723736	grey
RHOU	0.117411	-0.0492379	0.0421549	-0.000941823	-0.0178871	-0.0200208	0.0152677	-0.0152677	0.0306747	0.366119	0.439149	0.986216	0.742801	0.713398	0.779412	0.779412	turquoise
ST6GALNAC4	-0.109617	0.0644388	-0.0913143	-0.0508392	-0.00683904	-0.0324242	-0.0281324	0.0281324	0.043707	0.236694	0.0932354	0.35072	0.900162	0.551881	0.605742	0.605742	grey
DAP3	-0.0853643	0.0218856	0.0564617	0.00721013	0.0834489	0.00946721	-0.217905	0.217905	0.116699	0.688039	0.299942	0.894776	0.125163	0.862125	5.21108e-05	5.21108e-05	blue
MSI2	-0.0186921	0.00365613	0.0424753	-0.00152699	0.0322887	0.0438089	-0.113319	0.113319	0.731661	0.946528	0.435675	0.977653	0.553544	0.421389	0.0370296	0.0370296	turquoise
NPPC	-0.0370506	-0.154653	-0.0425799	-0.0514377	0.00174804	-0.0649677	0.17732	-0.17732	0.496576	0.0043154	0.434546	0.345069	0.974419	0.23286	0.00104263	0.00104263	green
DKC1	-0.0176206	0.132863	0.0135313	-0.0203129	0.00779062	0.0388046	-0.299598	0.299598	0.746501	0.0143614	0.803957	0.709404	0.886359	0.476404	1.84916e-08	1.84916e-08	blue
VIRMA	0.0103728	0.0359828	0.0936273	0.120407	0.00347204	0.112796	-0.148137	0.148137	0.849087	0.509074	0.0852006	0.0266356	0.949216	0.037916	0.00628541	0.00628541	turquoise
TMEM217	0.0686536	0.0375882	-0.1077	-0.0264496	-0.00473434	-0.066905	-0.00701201	0.00701201	0.207357	0.490346	0.0475455	0.627481	0.930793	0.219193	0.897651	0.897651	grey
FYN	-0.0647343	-0.00789563	0.140611	0.0756913	0.0568918	0.0474818	0.354738	-0.354738	0.234546	0.884838	0.00953487	0.164385	0.29627	0.383484	1.72811e-11	1.72811e-11	green
DBNDD2	0.108425	-0.00477208	0.00152294	-0.0603178	-0.000635178	-0.00775176	0.111207	-0.111207	0.0460615	0.930243	0.977713	0.268089	0.990703	0.886922	0.0407235	0.0407235	black
ZNF782	0.0821737	0.0485428	0.0609485	0.0353665	0.0262884	0.0472048	-0.074492	0.074492	0.131057	0.372933	0.263108	0.516361	0.629581	0.386268	0.171193	0.171193	turquoise
DNPH1	-0.0242843	0.158129	-0.161942	-0.148008	-0.0489296	-0.109706	-0.1479	0.1479	0.655933	0.00351053	0.00278593	0.00633141	0.369132	0.0435355	0.0063703	0.0063703	grey60
NAF1	-0.0814784	0.0209963	0.0333105	0.0306363	-0.00944078	0.0650687	-0.151174	0.151174	0.13436	0.700091	0.541057	0.574032	0.862506	0.232132	0.00528435	0.00528435	blue
ARHGEF2	0.01297	-0.00358687	0.0744119	0.00292496	0.0790455	0.0124199	0.12819	-0.12819	0.811934	0.947539	0.171655	0.95721	0.146424	0.819771	0.0182127	0.0182127	turquoise
ZNF852	-0.0153759	-0.0220103	0.117909	0.0336352	0.00412114	0.112734	-0.0403939	0.0403939	0.777888	0.686356	0.0299695	0.537118	0.939739	0.0380238	0.45852	0.45852	turquoise
SEMA3A	-0.0719197	0.0104095	-0.0119149	0.0243712	-0.0300455	-0.00287902	0.185251	-0.185251	0.186501	0.84856	0.826982	0.654782	0.581443	0.957881	0.000608167	0.000608167	cyan
TK2	0.071338	0.0173954	0.128755	0.00214624	0.0630327	0.0395167	0.156425	-0.156425	0.190098	0.749632	0.0177042	0.968595	0.247101	0.468345	0.00388627	0.00388627	turquoise
SUMO4	-0.0346117	0.0176595	0.0780031	0.120046	-0.0521688	0.0753363	0.0767623	-0.0767623	0.52536	0.745961	0.151838	0.0270974	0.338248	0.166379	0.158479	0.158479	grey
EPB41L5	-0.00735029	0.121093	0.0185208	0.0322911	-0.00208	-0.000207393	-0.222085	0.222085	0.892742	0.025779	0.734027	0.553515	0.969564	0.996965	3.69849e-05	3.69849e-05	turquoise
PRSS22	0.0749162	0.0709587	-0.0902924	0.0245219	-0.0332005	-0.0176793	-0.0205768	0.0205768	0.168762	0.19247	0.0969727	0.652785	0.542395	0.745686	0.705803	0.705803	grey
TMEM52B	-0.0350263	-0.114916	0.124475	0.0240797	0.0356392	0.0311742	0.295124	-0.295124	0.520407	0.0344287	0.0218897	0.658648	0.513131	0.567324	3.06721e-08	3.06721e-08	grey
HPN	-0.000956077	-0.101289	-0.099676	0.0153838	-0.0185774	-0.0182924	-0.0370907	0.0370907	0.986007	0.0624869	0.0667997	0.777778	0.733245	0.737185	0.49611	0.49611	darkturquoise
BIRC6	0.0577425	0.0880085	0.127256	0.0948406	0.0330249	0.113332	-0.163312	0.163312	0.289095	0.105757	0.0190827	0.0812142	0.544533	0.0370084	0.00256088	0.00256088	turquoise
PCGF1	-0.0594845	0.0904169	-0.0267476	-0.0247966	-0.03852	0.021389	-0.0433715	0.0433715	0.274768	0.096511	0.623607	0.649154	0.479646	0.69476	0.426044	0.426044	blue
HTR3A	-0.0674148	-0.0014146	-0.00684752	-0.0231585	-0.0205322	0.012612	-0.0268497	0.0268497	0.215693	0.979298	0.900039	0.670927	0.706411	0.817033	0.622282	0.622282	red
GBP2	-0.045123	0.0368474	0.207992	0.0176247	0.036571	0.0300955	0.199089	-0.199089	0.407582	0.498941	0.000114471	0.746444	0.502169	0.580815	0.000225079	0.000225079	tan
EEF1AKMT1	-0.00198834	-0.0268701	-0.00131323	-0.0318437	-0.0306946	0.0291975	0.0733023	-0.0733023	0.970904	0.622017	0.980781	0.559028	0.573304	0.592158	0.178152	0.178152	grey
TOP2A	0.0276849	0.0506084	-0.0311467	-0.0262739	0.0278613	0.0429987	-0.21598	0.21598	0.61149	0.352914	0.567666	0.62977	0.609221	0.430036	6.08866e-05	6.08866e-05	blue
CISD2	-0.0424105	0.107488	0.0102774	-0.00242459	0.0201731	0.0196578	-0.159182	0.159182	0.436377	0.0479862	0.850458	0.964525	0.711314	0.718372	0.00329497	0.00329497	blue
TMEM181	-0.0025152	0.116685	0.13764	0.0733514	-0.0308125	0.0588206	-0.300323	0.300323	0.9632	0.0317295	0.0111824	0.177861	0.571831	0.28017	1.70212e-08	1.70212e-08	turquoise
CCL4L2	-0.0669258	0.0819949	0.108298	0.0258647	-0.0434187	0.00247561	0.0955827	-0.0955827	0.219049	0.131901	0.0463184	0.635114	0.425541	0.963778	0.0788514	0.0788514	darkorange
ANXA1	0.0302053	-0.0352996	-0.140214	-0.0529958	-0.0272117	-0.0428572	-0.04542	0.04542	0.579434	0.517156	0.0097419	0.330635	0.617595	0.431556	0.404499	0.404499	pink
LAMTOR5	-0.103852	0.0116297	-0.0111696	-0.0687404	0.0207705	0.00832676	-0.118493	0.118493	0.0561046	0.83106	0.837649	0.206782	0.703164	0.878597	0.02916	0.02916	grey
SGPP1	-0.0567704	-0.0465746	0.0908282	0.0878749	0.0157101	0.144353	0.073746	-0.073746	0.297303	0.392648	0.0949985	0.106289	0.773191	0.00776872	0.175533	0.175533	red
TCP11L2	0.00270209	-0.0419317	0.116169	0.0499304	0.03947	0.0953904	0.122188	-0.122188	0.960467	0.441578	0.0324973	0.359409	0.46887	0.0794584	0.0244585	0.0244585	turquoise
FAM98B	-0.0342968	-0.00576678	0.17549	0.0405753	-0.0104745	0.0173882	-0.0149567	0.0149567	0.529137	0.915752	0.00117699	0.456503	0.847625	0.749732	0.783792	0.783792	blue
RALGPS1	0.110921	0.0684321	0.0716126	-0.0241319	-0.0370253	0.0718664	-0.202352	0.202352	0.041248	0.20883	0.188393	0.657955	0.49687	0.186828	0.000176265	0.000176265	turquoise
LRRC56	0.0950712	0.164019	-0.0894651	-0.0438572	0.0711467	-0.0278935	-0.090067	0.090067	0.0804741	0.0024512	0.100085	0.420877	0.191291	0.608807	0.0978129	0.0978129	grey
TOR2A	-0.00678952	0.0746994	-0.0785826	-0.0488998	-0.0398509	0.0129706	-0.190114	0.190114	0.900881	0.170001	0.14881	0.369424	0.464588	0.811926	0.000432211	0.000432211	grey
TSPAN33	-0.0499268	-0.100387	-0.00450312	-0.0374097	-0.0223875	-0.0143941	0.0659177	-0.0659177	0.359444	0.0648694	0.934165	0.49241	0.681273	0.791735	0.226084	0.226084	green
C5orf51	-0.0660159	0.0169337	0.0788432	-0.0453776	-0.0325008	0.0183574	0.0261236	-0.0261236	0.225392	0.756065	0.147463	0.404939	0.550942	0.736287	0.631731	0.631731	turquoise
UCN2	0.0710093	0.0478993	-0.0503455	0.0241748	-0.0251756	-0.00161136	0.132448	-0.132448	0.192153	0.37931	0.355423	0.657385	0.644158	0.976419	0.014672	0.014672	lightgreen
CCSAP	-0.0916263	0.0168213	0.150462	-0.02439	-0.0229948	0.0369558	-0.107167	0.107167	0.0921176	0.757632	0.00550522	0.654532	0.673119	0.497679	0.0486612	0.0486612	blue
CNOT9	-0.00174947	0.0779829	0.00592091	-0.0345512	0.031016	0.010943	-0.222083	0.222083	0.974399	0.151944	0.913509	0.526085	0.569294	0.840898	3.69922e-05	3.69922e-05	blue
MT-ND5	-0.0205149	0.00421207	-0.0283724	0.0726443	0.00498415	-0.0566655	0.04264	-0.04264	0.706646	0.938412	0.602669	0.18209	0.927151	0.298198	0.433896	0.433896	blue
SELENOP	0.00267655	-0.0675157	0.0515882	0.030752	-0.0180826	-0.018712	0.0763898	-0.0763898	0.960841	0.215005	0.343658	0.572586	0.74009	0.731387	0.160515	0.160515	grey
SLC8A2	-0.092931	-0.115666	0.0709488	-0.0416958	0.0153466	-0.0347152	0.238658	-0.238658	0.0875584	0.0332611	0.192532	0.444153	0.778302	0.524121	8.90086e-06	8.90086e-06	brown
GPR75	0.0224779	0.0283032	0.0623391	0.112479	0.0235461	0.0638088	-0.0874768	0.0874768	0.680057	0.603554	0.25235	0.0384627	0.665749	0.241318	0.107889	0.107889	turquoise
ENTPD8	0.083098	0.0841326	-0.100421	-0.0810107	-0.0329621	-0.108192	0.0118525	-0.0118525	0.126764	0.122089	0.0647777	0.136618	0.545299	0.0465337	0.827874	0.827874	lightcyan
KCTD10	0.0266645	-0.133733	0.154108	0.0800456	0.0541656	0.00588166	0.440566	-0.440566	0.624687	0.0137293	0.00445584	0.141369	0.320057	0.91408	1.57461e-17	1.57461e-17	brown
CARD6	0.0445209	-0.0305865	-0.000294538	0.0096515	-0.0147819	-0.0204968	0.0111798	-0.0111798	0.413875	0.574656	0.995689	0.859468	0.786258	0.706894	0.837503	0.837503	grey
IL11RA	-0.0289841	-0.0640463	0.0590135	0.0335703	0.0563829	-0.015321	0.238174	-0.238174	0.594868	0.239567	0.278593	0.537904	0.300618	0.778662	9.29298e-06	9.29298e-06	brown
TACC1	0.0445469	-0.151968	0.163725	0.0451361	0.0838489	0.0491164	0.320625	-0.320625	0.413602	0.00504734	0.00249623	0.407446	0.123357	0.367305	1.52436e-09	1.52436e-09	brown
PTPRA	0.086774	0.0633448	0.113442	0.0182079	0.0190252	0.020667	0.0436721	-0.0436721	0.11076	0.244764	0.0368238	0.738355	0.727068	0.704573	0.422842	0.422842	turquoise
LTF	-0.0568511	-0.0706137	0.0414712	-0.0202391	0.137095	0.0415131	0.0137781	-0.0137781	0.296616	0.194647	0.446613	0.710412	0.0115106	0.446154	0.800456	0.800456	grey
NOL8	-0.0488007	0.0368741	0.181158	0.0473877	0.0212072	0.135638	-0.124417	0.124417	0.370396	0.49863	0.000805425	0.384428	0.697227	0.0124302	0.0219515	0.0219515	blue
SETDB1	0.0575224	0.047396	0.0314909	0.042606	0.0401245	0.0468212	-0.135249	0.135249	0.29094	0.384345	0.563392	0.434263	0.461525	0.390144	0.0126862	0.0126862	turquoise
SLC41A1	0.0240131	-0.0645094	0.0750558	-0.000441442	0.0222972	0.0343168	0.0480522	-0.0480522	0.659532	0.236179	0.167967	0.993539	0.682489	0.528896	0.37779	0.37779	turquoise
RHOT1	0.0629235	0.0192928	0.0869923	-0.0329427	0.0364029	0.0314687	-0.0664279	0.0664279	0.247923	0.723384	0.109862	0.545536	0.504138	0.563667	0.222504	0.222504	blue
HMCES	0.00459731	0.00861886	-0.00563157	-0.0413954	-0.0274902	-0.00686239	-0.186451	0.186451	0.932791	0.874373	0.91772	0.447446	0.613999	0.899823	0.000559438	0.000559438	blue
TOB1	-0.0279552	0.0568138	0.12008	-0.014957	0.0867662	0.0299425	-0.0833979	0.0833979	0.608015	0.296934	0.0270532	0.783788	0.110792	0.58274	0.125395	0.125395	turquoise
SQOR	-0.0610283	0.124683	0.0531387	-0.0489298	0.0146227	-0.00313567	-0.0815852	0.0815852	0.262482	0.0216679	0.329331	0.36913	0.788505	0.95413	0.133849	0.133849	grey
DSP	0.0732936	0.0171811	-0.159085	-0.0608078	-0.0351861	-0.0362999	-0.178018	0.178018	0.178204	0.752615	0.00331424	0.264213	0.518505	0.505345	0.000995153	0.000995153	pink
KCTD7	0.0186078	-0.060956	0.131517	0.0968309	0.063923	0.0697404	0.304423	-0.304423	0.732825	0.263048	0.0153895	0.075003	0.240475	0.200238	1.06106e-08	1.06106e-08	brown
SKA1	-0.111371	0.0931448	0.0206745	-0.0876197	-0.0631835	-0.0284233	-0.229994	0.229994	0.0404269	0.0868288	0.70447	0.107313	0.245969	0.602018	1.89892e-05	1.89892e-05	blue
RAB4A	0.0310993	-0.0904286	0.0396217	0.0348298	0.0267291	-0.0101938	-0.0867348	0.0867348	0.568256	0.0964676	0.467162	0.522751	0.623847	0.851661	0.110922	0.110922	turquoise
DPH1	-0.0173982	0.061249	-0.0204824	0.0275573	-0.0197008	0.0152925	-0.0674095	0.0674095	0.749593	0.260757	0.70709	0.613134	0.717781	0.779063	0.215729	0.215729	blue
CYP39A1	0.0762352	-0.0196961	0.0266442	0.0320995	-0.0458586	0.0193566	0.105922	-0.105922	0.161366	0.717846	0.62495	0.555873	0.399972	0.722507	0.051353	0.051353	grey
DUSP28	0.0160488	0.0517181	-0.0127965	0.0293582	0.0296154	0.0275191	-0.0896061	0.0896061	0.76844	0.342443	0.814404	0.59012	0.586867	0.613626	0.0995491	0.0995491	turquoise
SDC3	-0.0224652	-0.170198	0.158865	0.0710271	0.00146431	0.0342367	0.337313	-0.337313	0.680228	0.00166044	0.0033585	0.192041	0.97857	0.529859	1.82421e-10	1.82421e-10	brown
ATP1A2	-0.0592299	-0.134969	0.0639362	0.0156218	-0.0131048	-0.0129237	0.290808	-0.290808	0.276831	0.012873	0.240377	0.774431	0.810018	0.812593	4.9568e-08	4.9568e-08	brown
TC2N	-0.0335372	0.100589	-0.0115053	0.0144192	-0.0567742	0.0361439	-0.315988	0.315988	0.538305	0.0643297	0.83284	0.79138	0.297271	0.507177	2.68802e-09	2.68802e-09	grey
ABR	0.050949	0.124026	0.0416971	-0.0241184	0.0500343	0.022835	-0.011898	0.011898	0.349679	0.0223742	0.444139	0.658134	0.358408	0.67526	0.827223	0.827223	turquoise
NUDT7	-0.0267071	-0.0252292	0.0107878	-0.134705	0.0110512	-0.0833209	0.0575877	-0.0575877	0.624133	0.643452	0.843127	0.0130522	0.839347	0.125745	0.290392	0.290392	cyan
SLC25A27	0.0340144	0.0311867	0.0419003	0.0111386	-0.0450578	-0.0279948	0.0796543	-0.0796543	0.532536	0.567168	0.44192	0.838094	0.408261	0.607506	0.14333	0.14333	brown
ARHGAP22	0.0589141	-0.0863725	0.0197256	-0.00538681	0.0110712	-0.0243891	0.416849	-0.416849	0.279405	0.112427	0.717441	0.921284	0.839061	0.654544	1.10679e-15	1.10679e-15	yellow
ATP2A2	0.0714495	-0.00316377	0.0496571	0.0347551	0.0068245	0.0842518	-0.154546	0.154546	0.189404	0.95372	0.362048	0.523645	0.900373	0.121559	0.0043426	0.0043426	turquoise
FXYD4	0.0448602	-0.037728	0.0425285	0.0551795	-0.00152635	0.117325	-0.00901694	0.00901694	0.410322	0.488732	0.4351	0.311069	0.977663	0.0307981	0.868622	0.868622	grey
ARHGEF16	0.0502546	0.146204	-0.0487415	-0.00173172	0.00177221	0.00561998	-0.294043	0.294043	0.356293	0.00700785	0.370978	0.974658	0.974066	0.917889	3.46158e-08	3.46158e-08	blue
SLF2	0.0501458	0.0216698	0.151731	0.0749606	0.0111022	0.114087	-0.0144062	0.0144062	0.357337	0.690957	0.00511697	0.168509	0.838615	0.0357585	0.791565	0.791565	turquoise
MTF1	0.0103462	0.0175367	0.0536576	0.0413561	0.00523011	0.0784734	-0.0757911	0.0757911	0.849469	0.747667	0.324624	0.447877	0.923567	0.149377	0.163828	0.163828	turquoise
RABEP1	0.0261768	-0.034156	0.217278	0.0778905	0.0473657	0.0726369	0.0853339	-0.0853339	0.631037	0.530831	5.48265e-05	0.152432	0.384649	0.182135	0.116829	0.116829	turquoise
ARHGAP42	-0.0187578	0.104198	0.106062	0.140565	0.070966	0.134218	-0.129438	0.129438	0.730754	0.0552856	0.0510456	0.00955903	0.192425	0.0133876	0.0171049	0.0171049	turquoise
MAPK8IP1	-0.022397	-0.0496328	0.00126866	-0.0185906	-0.0347348	0.00664094	0.0949909	-0.0949909	0.681145	0.362283	0.981433	0.733063	0.523887	0.90304	0.0807311	0.0807311	black
DOCK7	0.0334268	0.00635455	0.0733331	0.0353578	-0.0164508	0.00856492	-0.130534	0.130534	0.539645	0.907202	0.17797	0.516465	0.762809	0.875152	0.0161807	0.0161807	turquoise
LPAR1	0.0407566	-0.128475	0.0598342	0.0914078	0.00203749	-0.0745148	0.363827	-0.363827	0.454492	0.0179547	0.271952	0.0928992	0.970186	0.171062	4.76673e-12	4.76673e-12	yellow
HSPE1	-0.164217	0.117874	0.0361291	0.0364477	-0.0396765	0.0550278	-0.249405	0.249405	0.00242133	0.0300192	0.507352	0.503612	0.466546	0.312403	3.33987e-06	3.33987e-06	grey
CCDC92	0.0459107	-0.139018	0.0482973	0.0584632	0.0165545	-0.00692842	0.35367	-0.35367	0.399436	0.0103896	0.375358	0.283108	0.76136	0.898864	2.00515e-11	2.00515e-11	brown
ZYX	-0.0392975	-0.0359777	0.101854	-0.0306008	0.0294716	0.00961889	0.385897	-0.385897	0.470817	0.509134	0.0610288	0.574476	0.588684	0.859938	1.75645e-13	1.75645e-13	brown
MT-ATP6	0.0193028	-0.0196639	-0.0482307	0.00924742	-0.0386713	-0.0186227	0.0259852	-0.0259852	0.723246	0.718287	0.376018	0.865295	0.477921	0.73262	0.633539	0.633539	turquoise
EMP1	0.0492305	-0.0239036	-0.083626	-0.0452164	-0.0211763	-0.0355841	0.00113438	-0.00113438	0.366192	0.660988	0.124361	0.406611	0.697646	0.513783	0.983398	0.983398	pink
PPIA	-0.00153638	0.0926764	-0.0560734	-0.00318729	-0.0478874	0.0131584	-0.238272	0.238272	0.977516	0.0884335	0.303284	0.953376	0.379429	0.809255	9.21247e-06	9.21247e-06	brown
GAL3ST4	-0.0637708	-0.0788567	0.117199	0.0936093	0.0474843	0.0502772	0.358503	-0.358503	0.241599	0.147393	0.0309793	0.0852609	0.383458	0.356077	1.01859e-11	1.01859e-11	magenta
TMEM198	-0.0112654	-0.0279901	-0.0323745	-0.0530592	0.00620929	0.00858047	-0.00222471	0.00222471	0.836277	0.607567	0.552491	0.330056	0.909314	0.874928	0.967447	0.967447	midnightblue
FAM183A	-0.0151746	0.0403764	-0.0467849	0.0039179	-0.0203267	0.00454739	0.0263757	-0.0263757	0.780722	0.458715	0.390512	0.942705	0.709215	0.93352	0.628444	0.628444	cyan
AP3S2	0.0441814	-0.00191672	0.0380755	0.0382369	0.00231972	0.105185	-0.0353166	0.0353166	0.417448	0.971952	0.484734	0.482884	0.966058	0.0530061	0.516954	0.516954	turquoise
SLC52A3	0.0413873	0.157899	0.00997146	-0.0820749	-0.00737716	-0.00025205	-0.219741	0.219741	0.447534	0.00355926	0.854861	0.131523	0.892352	0.996311	4.48593e-05	4.48593e-05	grey
DHFR2	0.107133	-0.0394391	0.175441	0.0851222	-0.0605308	0.0346864	0.126354	-0.126354	0.0487342	0.469219	0.00118086	0.117743	0.266399	0.524466	0.0199565	0.0199565	turquoise
CST6	0.0612991	-0.017541	-0.0775287	0.0608641	0.00959539	0.0341085	0.0559229	-0.0559229	0.260366	0.747607	0.154352	0.263771	0.860277	0.531402	0.304585	0.304585	purple
KYAT1	-0.000759427	0.0219946	-0.0300353	-0.0792433	0.0476303	0.0136211	0.0637175	-0.0637175	0.988885	0.686568	0.581572	0.145413	0.381996	0.802682	0.241993	0.241993	grey
ALKBH4	0.0146084	0.0061505	-0.0498637	-0.0153829	-0.0071402	-0.0123809	-0.0338408	0.0338408	0.788706	0.910169	0.360052	0.77779	0.89579	0.820328	0.534632	0.534632	royalblue
SDCBP	-0.0479192	0.0428986	0.120087	0.100914	-0.0143323	-0.0502023	-0.0403946	0.0403946	0.379113	0.431111	0.0270438	0.0634665	0.792609	0.356795	0.458512	0.458512	turquoise
BLZF1	-0.0992705	-0.00422698	0.0952302	0.0529541	0.00617697	0.0378281	-0.123326	0.123326	0.0679219	0.938194	0.0799667	0.331016	0.909784	0.487578	0.0231497	0.0231497	turquoise
SMC5	-0.0525905	0.121964	0.0149532	0.0481646	-0.038658	0.0193903	-0.210236	0.210236	0.334352	0.024724	0.783841	0.376673	0.478072	0.722044	9.60961e-05	9.60961e-05	midnightblue
CHST6	0.0140206	0.0208023	-0.00809676	0.0369918	0.0179578	0.0110243	0.0337432	-0.0337432	0.79702	0.70273	0.881925	0.497259	0.74182	0.839733	0.535811	0.535811	purple
BCL6B	0.0110465	0.00607269	0.144545	0.0411538	0.0495797	0.0368364	0.406187	-0.406187	0.839415	0.911301	0.00768654	0.450104	0.362797	0.499069	6.73084e-15	6.73084e-15	yellow
NINL	0.0563984	0.0428695	0.00377796	0.024113	-0.0552183	0.0413514	-0.00580468	0.00580468	0.300485	0.431424	0.944748	0.658205	0.310729	0.447929	0.9152	0.9152	turquoise
BRIP1	0.00901326	0.0613761	0.0416936	-0.035045	0.00540028	0.0405449	-0.23014	0.23014	0.868675	0.259767	0.444178	0.520184	0.921088	0.456841	1.87519e-05	1.87519e-05	blue
SORL1	0.0464831	0.0171199	0.0334101	0.00939745	0.027278	0.0628391	-0.0908465	0.0908465	0.393579	0.753468	0.539847	0.863131	0.616737	0.248558	0.0949314	0.0949314	turquoise
QDPR	-0.0915003	-0.0330294	0.00107292	-0.034477	-0.0563864	-0.00170404	-0.160125	0.160125	0.0925675	0.544478	0.984297	0.526974	0.300588	0.975063	0.00311235	0.00311235	blue
PCYOX1L	0.0858101	-0.0702508	0.0246921	0.00059082	0.0192989	0.0296706	0.0120807	-0.0120807	0.114794	0.196957	0.650535	0.991353	0.7233	0.586169	0.824612	0.824612	turquoise
LGR4	0.0417541	0.0903605	0.0747426	0.1039	0.114252	0.107301	-0.235957	0.235957	0.443516	0.09672	0.169754	0.0559909	0.0354895	0.0483788	1.13078e-05	1.13078e-05	turquoise
ODAM	-0.0121643	0.0201424	0.00163232	-0.0154258	0.00289902	0.0253521	-0.0233363	0.0233363	0.823419	0.711734	0.976112	0.777187	0.957589	0.641837	0.66855	0.66855	grey
RBM38	-0.0308473	-0.0185832	-0.0513347	-0.0993439	-0.0140039	-0.0526295	0.0267403	-0.0267403	0.571397	0.733164	0.346038	0.0677176	0.797257	0.333993	0.623702	0.623702	grey
COX18	-0.0407793	0.0849181	0.124226	-0.010228	-0.00172189	0.0433867	-0.152616	0.152616	0.45424	0.118629	0.0221573	0.851169	0.974802	0.425882	0.00486117	0.00486117	blue
EDF1	-0.0640698	0.0465994	-0.0212514	-0.108859	-0.110103	0.0083861	0.00991602	-0.00991602	0.239394	0.392395	0.696627	0.0451914	0.0427761	0.877738	0.855659	0.855659	grey
AKAP9	0.0266167	0.0336176	0.0843076	0.0400406	-0.0460575	0.0763632	-0.0219945	0.0219945	0.625308	0.537331	0.121311	0.462463	0.39793	0.160661	0.686569	0.686569	cyan
LILRA5	0.0923608	0.0097139	0.140137	0.0457188	-0.0381154	-0.0118527	0.195857	-0.195857	0.0895279	0.858569	0.00978222	0.401412	0.484276	0.827871	0.000285645	0.000285645	magenta
PLA2G4C	0.0367484	-0.0569015	0.0793734	-0.0580344	0.0991097	-0.0812943	0.335158	-0.335158	0.500096	0.296187	0.144751	0.286659	0.0683711	0.135246	2.41686e-10	2.41686e-10	brown
MMS22L	-0.036713	0.116945	0.0850748	0.0261473	0.0181583	0.0321581	-0.230422	0.230422	0.500509	0.0313488	0.117948	0.631422	0.739041	0.555151	1.83029e-05	1.83029e-05	blue
SPPL2B	0.127666	0.11265	-0.0361574	-0.0257961	0.0437294	0.0363245	-0.0917104	0.0917104	0.0186961	0.0381673	0.50702	0.636013	0.422233	0.505056	0.0918179	0.0918179	turquoise
FAM171A2	-0.0341847	-0.0251513	-0.0341779	-0.056564	-0.0162372	-0.00941621	0.151148	-0.151148	0.530486	0.644477	0.530567	0.299066	0.765799	0.86286	0.00529215	0.00529215	salmon
GFPT2	0.00550471	-0.0554172	0.0484086	0.01218	-0.0266209	-0.0415271	0.440323	-0.440323	0.919567	0.308986	0.374258	0.823195	0.625253	0.446001	1.64751e-17	1.64751e-17	lightgreen
ALPK1	0.0762323	0.0850785	0.166904	0.081808	0.0720291	0.0772858	-0.0889417	0.0889417	0.161381	0.117932	0.00204699	0.132787	0.18583	0.155651	0.102095	0.102095	turquoise
LYPD5	-0.0751988	0.0550673	-0.0196939	-0.0228183	-0.0218262	0.00236395	-0.0432729	0.0432729	0.167156	0.312055	0.717875	0.675484	0.688842	0.965411	0.427097	0.427097	pink
NR2C1	-0.0454216	0.125633	0.115811	0.0576656	0.0178036	0.0502409	-0.109644	0.109644	0.404483	0.0206794	0.0330394	0.289739	0.74396	0.356424	0.0436546	0.0436546	turquoise
ZNF470	-0.0319304	-0.042064	0.0913969	0.0260176	0.0139482	0.0229163	0.120582	-0.120582	0.557956	0.440138	0.0929382	0.633115	0.798046	0.674171	0.0264147	0.0264147	brown
SMAD3	0.0655754	0.0271769	-0.00719713	0.0244946	0.0736578	0.0969065	-0.020602	0.020602	0.228509	0.618045	0.894964	0.653146	0.176051	0.0747747	0.705459	0.705459	turquoise
NDN	-0.0348342	-0.189189	0.10534	0.0352281	0.0172215	-0.0264589	0.564696	-0.564696	0.522699	0.000461515	0.0526533	0.518005	0.752053	0.627361	6.04374e-30	6.04374e-30	brown
CARD14	0.0681811	-0.0104233	-0.0950771	0.0833379	0.00156066	0.116659	-0.158013	0.158013	0.210508	0.848361	0.0804551	0.125668	0.977161	0.0317675	0.00353487	0.00353487	grey
MTMR7	-0.101118	0.0151471	-0.0779463	0.0451504	-0.0652219	-0.043599	0.0168143	-0.0168143	0.0629323	0.78111	0.152138	0.407297	0.231033	0.423619	0.75773	0.75773	midnightblue
PLA2G4A	0.0324089	0.0483259	0.010404	-0.0186238	-0.00480055	-0.00961629	-0.102059	0.102059	0.552069	0.375075	0.848639	0.732604	0.929828	0.859976	0.0605077	0.0605077	grey
TANGO2	-0.0246833	0.0345431	0.0830268	-0.0132865	0.0173131	0.0198314	0.166841	-0.166841	0.650651	0.526181	0.127091	0.807434	0.750777	0.715991	0.00205512	0.00205512	turquoise
NUP98	0.00217137	0.0202168	0.142313	0.0654111	0.0609591	0.122498	-0.163163	0.163163	0.968228	0.710716	0.00869184	0.229679	0.263024	0.0240958	0.00258452	0.00258452	turquoise
PIGX	-0.0190238	-0.0274729	0.0806499	-0.000172657	0.0588078	0.0365651	-0.0483073	0.0483073	0.727088	0.614222	0.13838	0.997473	0.280275	0.502238	0.37526	0.37526	turquoise
SLC19A2	0.0111266	-0.0400197	0.0916989	0.0251354	-0.0120322	0.070847	-0.0596181	0.0596181	0.838265	0.462697	0.0918588	0.644687	0.825306	0.193173	0.27369	0.27369	turquoise
PILRA	0.0292033	0.0418976	0.136378	0.0643723	0.00963222	-0.0376046	0.279978	-0.279978	0.592084	0.44195	0.0119553	0.237178	0.859746	0.490156	1.59625e-07	1.59625e-07	magenta
NFATC4	0.029892	-0.145317	0.118527	0.0416303	0.0753615	0.034309	0.501362	-0.501362	0.583377	0.0073638	0.0291136	0.44487	0.166237	0.52899	5.605e-23	5.605e-23	brown
RAP1GAP2	-0.00286747	0.139922	-0.0615427	-0.0058656	0.00944659	-0.00692694	-0.124318	0.124318	0.95805	0.00989684	0.258473	0.914314	0.862422	0.898886	0.0220582	0.0220582	turquoise
TNS2	-0.00772914	-0.135529	0.135223	0.096394	0.0516511	0.0521515	0.494428	-0.494428	0.88725	0.0125015	0.0127031	0.0763321	0.343069	0.338408	2.66891e-22	2.66891e-22	yellow
FAM72D	-0.0534899	0.0580907	-0.0348873	-0.0758354	-0.00659659	-0.0243756	-0.167554	0.167554	0.32614	0.286191	0.522064	0.163581	0.903684	0.654722	0.00196466	0.00196466	blue
ALYREF	-0.0563877	0.0711781	-0.0583912	-0.0984325	0.024608	-0.0117438	-0.11836	0.11836	0.300577	0.191095	0.283702	0.0702899	0.651647	0.829428	0.0293422	0.0293422	blue
SOCS6	-0.113423	0.139717	0.0874391	-0.0476259	0.0708594	0.0244212	-0.162866	0.162866	0.0368555	0.0100064	0.108042	0.38204	0.193095	0.654118	0.00263222	0.00263222	turquoise
DEPDC1	-0.111192	0.160656	0.0302514	0.0306792	-0.0322493	0.0822552	-0.311001	0.311001	0.0407512	0.00301353	0.578855	0.573496	0.55403	0.130675	4.89487e-09	4.89487e-09	blue
HNRNPL	-0.0257005	0.0978002	-0.00221986	-0.0526474	0.0318063	0.0269595	-0.158571	0.158571	0.637265	0.0721209	0.967518	0.333828	0.559489	0.620858	0.00341846	0.00341846	blue
IQCN	-0.0119468	-0.11045	0.065045	0.0150425	0.00493161	0.0337526	0.0539878	-0.0539878	0.826527	0.0421214	0.232303	0.782583	0.927917	0.535697	0.32165	0.32165	grey
TRMT6	0.0379365	0.0983741	0.0142248	-0.0405258	-0.0448538	-0.0132189	-0.154819	0.154819	0.486331	0.0704574	0.794129	0.457052	0.410388	0.808395	0.00427339	0.00427339	blue
VWA7	-0.0154482	-0.0406211	-0.0558666	0.0854386	-0.0649986	0.0745133	-0.145272	0.145272	0.776872	0.455995	0.305073	0.116379	0.232637	0.171071	0.00738247	0.00738247	grey
CC2D1A	0.0905046	0.0543047	-0.189073	-0.0959633	0.0220547	-0.0841539	-0.213005	0.213005	0.0961869	0.318814	0.000465331	0.0776614	0.685758	0.121994	7.72384e-05	7.72384e-05	blue
AVL9	0.0983393	0.0817217	0.103891	0.0392946	0.0207572	0.0793684	-0.259473	0.259473	0.0705572	0.133197	0.0560112	0.47085	0.703345	0.144777	1.27924e-06	1.27924e-06	turquoise
TDRD5	-0.0639508	0.0575652	-0.0883714	-0.0332358	-0.0328472	-0.0830028	-0.124623	0.124623	0.24027	0.29058	0.104321	0.541964	0.546702	0.127201	0.0217318	0.0217318	grey
CCL11	0.0801273	-0.0819567	0.03256	-0.0146075	-0.0373079	0.00263583	0.260969	-0.260969	0.140962	0.132082	0.550215	0.78872	0.493588	0.961436	1.10544e-06	1.10544e-06	yellow
DSG3	0.0124109	0.0105749	-0.103228	-0.0528854	-0.0393435	-0.018183	-0.057446	0.057446	0.8199	0.846182	0.0576056	0.331645	0.470298	0.7387	0.291582	0.291582	pink
ARL1	-0.0224759	0.0416793	0.134777	0.0569838	-0.0493524	0.0473046	-0.15484	0.15484	0.680084	0.444334	0.0130031	0.295488	0.365005	0.385263	0.00426827	0.00426827	turquoise
IL12RB2	-0.00277613	0.140706	0.00436869	-0.0396693	0.0595764	-0.0160874	-0.0537409	0.0537409	0.959385	0.00948587	0.936126	0.466627	0.274026	0.767898	0.323872	0.323872	green
C3orf52	0.152859	0.0569549	-0.0188169	0.0699604	-0.0118665	0.0873431	-0.166213	0.166213	0.00479295	0.295733	0.729938	0.198819	0.827674	0.108431	0.00213783	0.00213783	turquoise
ANKRD49	0.0505344	0.104517	0.108092	0.0938203	-0.00890407	0.0800966	-0.159982	0.159982	0.353619	0.0545396	0.0467374	0.0845561	0.870251	0.141115	0.00313929	0.00313929	grey
PPIE	-0.0672189	-0.00117275	-0.0326224	0.00703475	0.0626429	0.0301731	0.00421149	-0.00421149	0.217032	0.982837	0.549452	0.897321	0.250041	0.579839	0.93842	0.93842	blue
ERP44	-0.0100403	0.0991067	0.0674382	0.0209857	-0.0656356	-0.00310313	-0.249338	0.249338	0.853869	0.0683797	0.215533	0.700235	0.228081	0.954606	3.36067e-06	3.36067e-06	blue
TAF4B	-0.040122	-0.00671382	0.166742	0.0980853	0.0196011	0.0834653	-0.169674	0.169674	0.461553	0.901981	0.00206788	0.0712905	0.719149	0.125089	0.00171705	0.00171705	blue
PCID2	0.0106808	0.0812544	0.0797418	0.0327798	0.00995435	0.0958623	-0.123575	0.123575	0.844663	0.135438	0.14289	0.547525	0.855107	0.0779758	0.0228715	0.0228715	blue
SARM1	-0.00976314	-0.0702437	0.0488302	0.0912684	0.0104171	0.0634579	0.182523	-0.182523	0.85786	0.197002	0.370107	0.0934006	0.848451	0.24392	0.000733897	0.000733897	turquoise
SMAP2	-0.054303	0.00197373	0.0462614	0.00328634	0.00898602	0.0150514	0.0570773	-0.0570773	0.318829	0.971118	0.395841	0.951929	0.869068	0.782457	0.294695	0.294695	green
LIPT2	0.071977	-0.0420958	-0.0823065	0.019302	-0.052262	-0.00433102	-0.263467	0.263467	0.186149	0.439791	0.130434	0.723258	0.337384	0.936676	8.64446e-07	8.64446e-07	grey
SRF	-0.0329647	-0.0130506	0.016176	-0.0516111	-0.00108021	-0.0427888	0.19435	-0.19435	0.545267	0.810788	0.766656	0.343444	0.984191	0.432292	0.000318809	0.000318809	brown
LTB	-0.0228259	-0.131562	-0.0209914	-0.0175836	0.0491393	-0.0429575	0.235658	-0.235658	0.675383	0.0153546	0.700158	0.747016	0.367082	0.430478	1.16092e-05	1.16092e-05	green
EIF4G3	0.0315288	-0.0320224	0.106624	0.0800105	0.0133067	0.0990125	-0.00320489	0.00320489	0.562922	0.556822	0.049821	0.141544	0.807147	0.0686438	0.953119	0.953119	turquoise
BLACAT1	0.0747465	0.0074354	0.0403579	0.00306396	0.0528761	0.0639808	-0.054798	0.054798	0.169731	0.891508	0.458921	0.955178	0.33173	0.240049	0.314431	0.314431	grey
SLC6A8	-0.101579	0.0627785	0.0534271	0.0169492	0.0272251	0.0086795	-0.114632	0.114632	0.0617358	0.249016	0.326709	0.755849	0.617421	0.873496	0.0348791	0.0348791	grey
NOP14	-0.0601407	0.0545984	0.0165011	0.0147679	-0.00341131	0.0493947	-0.23125	0.23125	0.269499	0.3162	0.762106	0.786455	0.950103	0.364593	1.70431e-05	1.70431e-05	blue
HCAR3	-0.044437	0.0510064	-0.102111	-0.0313679	-0.0407696	-0.0465953	-0.0569936	0.0569936	0.414756	0.349135	0.0603761	0.564918	0.454348	0.392437	0.295405	0.295405	darkorange
DMXL1	0.00695966	0.00260299	0.133212	0.105723	0.0026615	0.0707588	0.0120223	-0.0120223	0.898411	0.961916	0.0141046	0.0517957	0.961061	0.193729	0.825447	0.825447	turquoise
AARS	-0.0180876	0.0454403	0.10894	-0.00771217	0.0887599	0.0399871	-0.114899	0.114899	0.740022	0.404289	0.0450307	0.887496	0.1028	0.463062	0.0344542	0.0344542	blue
VIPAS39	0.05607	-0.0216307	0.0431819	0.0328338	0.0926479	0.0600086	0.0180893	-0.0180893	0.303313	0.691486	0.428072	0.546865	0.0885318	0.270554	0.739998	0.739998	turquoise
USP45	-0.0268385	0.089352	0.141935	0.129553	-0.00473796	0.0662879	-0.183936	0.183936	0.622427	0.100517	0.00887311	0.0170062	0.93074	0.223482	0.000666026	0.000666026	turquoise
CHMP4C	-0.0360227	0.158853	-0.100767	-0.0683727	-0.0891045	-0.0716447	-0.269367	0.269367	0.508604	0.00336096	0.0638569	0.209226	0.101466	0.188195	4.78817e-07	4.78817e-07	grey
FAM83A	0.0139503	-0.00803646	-0.125335	0.0167894	-0.0525947	-0.0215041	-0.0388569	0.0388569	0.798016	0.882798	0.0209858	0.758079	0.334313	0.6932	0.47581	0.47581	purple
TATDN1	0.0148904	0.121493	0.0426272	0.0577559	-0.047416	0.0520445	-0.140153	0.140153	0.784728	0.0252891	0.434034	0.288982	0.384144	0.339401	0.00977379	0.00977379	grey
TMEM231	-0.0354513	0.0857103	0.0844409	0.0143938	0.0910828	0.0214515	0.0154284	-0.0154284	0.515355	0.115218	0.120721	0.791739	0.0940718	0.693913	0.777151	0.777151	turquoise
APOBEC3C	-0.0300624	-0.0792499	0.124683	0.00830805	0.0662708	0.0944939	0.154308	-0.154308	0.581231	0.145379	0.0216681	0.878867	0.223602	0.0823376	0.0044036	0.0044036	green
AKIRIN2	-0.0658382	0.0136503	0.0491624	-0.0283928	-0.0331544	0.0288325	-0.00459052	0.00459052	0.226646	0.802268	0.366856	0.602408	0.542956	0.596797	0.93289	0.93289	blue
TBX6	0.125671	-0.0481308	-0.0463992	0.0855038	0.0799021	0.065136	0.0446811	-0.0446811	0.0206408	0.377009	0.394435	0.1161	0.142086	0.231649	0.412195	0.412195	grey
NRP1	0.0530547	-0.0110678	0.158254	0.13811	0.0643573	0.0569859	0.392017	-0.392017	0.330097	0.839109	0.00348427	0.0109061	0.237288	0.29547	6.72254e-14	6.72254e-14	yellow
FLT3	0.0165695	-0.112819	0.13191	0.0703449	0.0554754	0.0647824	0.186504	-0.186504	0.76115	0.0378771	0.0150833	0.196355	0.308477	0.234198	0.00055737	0.00055737	green
RNF126	-0.0569914	0.0975051	-0.0518319	-0.0759237	0.0260954	-0.0378735	-0.155944	0.155944	0.295423	0.0729885	0.34138	0.16309	0.632099	0.487056	0.00399885	0.00399885	blue
ACTRT3	-0.00438214	-0.0655221	-0.00753029	0.00937995	0.0178367	0.0438645	0.0215242	-0.0215242	0.93593	0.228889	0.890132	0.863383	0.7435	0.420799	0.692928	0.692928	grey
SYNPO	0.000142979	-0.129857	0.076828	0.0460236	0.0197188	0.0640036	0.39567	-0.39567	0.997907	0.0167463	0.158122	0.398278	0.717535	0.239881	3.75298e-14	3.75298e-14	yellow
DDB1	0.0483496	0.059985	0.0234347	0.0639749	0.0435457	0.0799295	-0.129894	0.129894	0.374841	0.270743	0.667237	0.240093	0.424187	0.141949	0.0167152	0.0167152	turquoise
RAD54L2	0.0471775	-0.0290218	0.0787849	-0.0118607	0.015471	0.0466457	-0.0305905	0.0305905	0.386543	0.594389	0.147763	0.827757	0.776551	0.391924	0.574606	0.574606	turquoise
MTLN	0.0226303	0.0134009	-0.0839007	-0.122227	-0.0235176	-0.0413025	0.0136757	-0.0136757	0.678009	0.805809	0.123125	0.0244128	0.666131	0.448466	0.801908	0.801908	turquoise
ASF1B	0.00411237	0.0938949	-0.0890499	-0.0870705	0.0669708	-0.0244819	-0.281547	0.281547	0.939867	0.0843083	0.101677	0.109541	0.218739	0.653315	1.35158e-07	1.35158e-07	blue
DPH3	-0.112232	-0.0304331	0.11085	0.0799069	-0.0038512	0.0256451	-0.00656051	0.00656051	0.0388947	0.576577	0.041378	0.142062	0.943679	0.637991	0.904208	0.904208	turquoise
ZC3H10	-0.00505284	-0.0734488	0.0810425	0.0497715	-0.0109543	0.0708731	0.204958	-0.204958	0.92615	0.177284	0.136464	0.360942	0.840737	0.193009	0.0001446	0.0001446	turquoise
FAM227B	0.0148316	-0.0423454	-0.0452311	-0.000820338	0.00917692	-0.0651644	0.0523816	-0.0523816	0.785556	0.437082	0.406458	0.987994	0.866312	0.231445	0.336278	0.336278	grey
2020-03-08	-0.0255652	-0.021752	0.0779515	0.0572618	0.000629282	0.0554318	0.116441	-0.116441	0.639039	0.689846	0.15211	0.293135	0.99079	0.308858	0.0320899	0.0320899	turquoise
MFF	-0.0478559	0.0854869	0.0545884	0.0116566	0.00291977	-0.00948873	-0.108074	0.108074	0.379744	0.116172	0.316289	0.830675	0.957286	0.861815	0.0467749	0.0467749	blue
MSRB2	0.0126474	-0.00781987	0.0173576	-0.0620381	0.0558987	-0.0700245	0.0876376	-0.0876376	0.816528	0.885935	0.750158	0.254653	0.304795	0.198407	0.107241	0.107241	grey
NLRC3	-0.0327026	-0.0163352	0.16221	0.0841465	0.0554274	0.108744	0.143324	-0.143324	0.548469	0.764427	0.00274056	0.122027	0.308897	0.0454213	0.00822281	0.00822281	green
ALDH1B1	-0.00437905	-0.11632	0.104335	-0.0330524	0.0269811	-0.064146	0.31351	-0.31351	0.935975	0.0322702	0.0549634	0.544198	0.620579	0.238835	3.6258e-09	3.6258e-09	brown
FYB1	-0.0139059	-0.0372781	0.216982	0.0791859	0.0392173	0.0738983	0.206087	-0.206087	0.798645	0.493934	5.61588e-05	0.145706	0.471724	0.17464	0.000132617	0.000132617	green
ZNF394	0.0452854	-0.00291373	0.019586	0.0719317	-0.0213974	-0.00105013	-0.0212568	0.0212568	0.405894	0.957374	0.719357	0.186427	0.694647	0.984631	0.696553	0.696553	royalblue
CTCF	0.025827	0.0768095	0.122752	0.0674583	0.0955166	0.115658	-0.147335	0.147335	0.635608	0.158223	0.0238017	0.215396	0.0790597	0.0332731	0.00657689	0.00657689	turquoise
XPNPEP2	0.0875419	0.0432035	-0.0139938	-0.0166191	0.022753	-0.0382206	-0.0623054	0.0623054	0.107626	0.42784	0.797399	0.760456	0.676362	0.48307	0.252607	0.252607	grey
HOMER3	-0.00152838	-0.0837754	0.063103	-0.0335823	0.0404075	0.0185328	0.275198	-0.275198	0.977633	0.123688	0.246573	0.537758	0.458369	0.733861	2.6334e-07	2.6334e-07	purple
SLC33A1	-0.00161391	-0.0119023	0.0839602	0.123237	-0.0459207	0.116804	-0.113754	0.113754	0.976382	0.827161	0.122858	0.0232495	0.399334	0.0315542	0.0363053	0.0363053	turquoise
HRH1	0.0154381	0.0513201	0.0656644	0.0312055	0.065934	0.0199912	0.16019	-0.16019	0.777014	0.346175	0.227877	0.566934	0.225969	0.713803	0.00310004	0.00310004	grey
ERCC5	0.0397735	0.122788	0.119895	0.112523	0.0212161	0.101214	-0.192274	0.192274	0.465456	0.023761	0.0272915	0.0383868	0.697106	0.0626799	0.000370388	0.000370388	grey
TSPAN1	-0.0316069	0.0534729	-0.0329581	0.00138991	-0.0326235	0.0127203	-0.16447	0.16447	0.561955	0.326294	0.545348	0.979659	0.549438	0.815489	0.00238357	0.00238357	grey
IRAK4	0.0675201	0.0246955	0.11395	0.0440994	0.0047801	0.0710922	-0.0149588	0.0149588	0.214975	0.65049	0.0359826	0.418313	0.930126	0.191633	0.783762	0.783762	turquoise
GPR107	0.0946701	0.0114694	0.0636691	0.0444166	-0.0276026	0.101434	-0.0248965	0.0248965	0.0817653	0.833355	0.242351	0.414971	0.61255	0.0621105	0.647836	0.647836	turquoise
MRPS27	0.0141088	0.0390596	0.103802	0.0896786	-0.0232443	0.106099	-0.132221	0.132221	0.795771	0.473509	0.0562244	0.0992741	0.66978	0.0509643	0.0148442	0.0148442	blue
POLQ	2.98038e-05	0.0756916	0.0986617	0.0408305	-0.0113776	0.129748	-0.295447	0.295447	0.999564	0.164383	0.0696356	0.453673	0.834669	0.0168387	2.95799e-08	2.95799e-08	blue
DDX58	-0.0145206	0.0508326	0.164781	0.0100445	-0.00460641	0.0559609	0.0960193	-0.0960193	0.789947	0.350782	0.00233792	0.853809	0.932659	0.304256	0.0774874	0.0774874	grey
SNX22	-0.0652096	-0.0646314	-0.0499358	0.039918	0.00904795	-0.0404568	0.0787434	-0.0787434	0.231121	0.235292	0.359356	0.463835	0.868174	0.45782	0.147978	0.147978	green
ECSCR	0.0514337	-0.042559	0.10927	0.000675668	0.0213006	-0.0414264	0.436546	-0.436546	0.345108	0.434771	0.0443818	0.990111	0.695958	0.447106	3.31501e-17	3.31501e-17	yellow
REX1BD	-0.03556	0.118575	0.0391801	-0.0534089	0.00043973	0.0336209	0.0349018	-0.0349018	0.514068	0.0290471	0.472145	0.326874	0.993564	0.537292	0.521892	0.521892	grey
CYBC1	0.0501707	0.0501996	0.0380418	0.0214492	0.00954878	0.037102	0.102387	-0.102387	0.357098	0.356821	0.485121	0.693944	0.860949	0.495978	0.0596817	0.0596817	green
EIF4ENIF1	0.00816223	-0.0133713	0.135208	0.0293929	0.0705124	0.0562397	0.0431363	-0.0431363	0.880978	0.80623	0.0127136	0.589681	0.19529	0.301849	0.428559	0.428559	turquoise
TXNL4B	-0.0187629	0.093538	-0.00681522	-0.00497726	0.0868908	0.0230514	-0.197943	0.197943	0.730684	0.0855002	0.900508	0.927252	0.110279	0.672361	0.000245025	0.000245025	blue
ICA1L	0.02255	-0.172885	0.0852811	0.00943447	0.00195272	-0.00314227	0.196215	-0.196215	0.679087	0.00139597	0.117057	0.862597	0.971425	0.954034	0.000278249	0.000278249	brown
CENPB	0.0227492	-0.00385544	-0.0615523	-0.116739	-0.0203089	-0.0553806	0.0739782	-0.0739782	0.676412	0.943617	0.258398	0.0316497	0.709458	0.309306	0.174174	0.174174	grey
ZBTB48	0.094632	0.084252	-0.0286405	0.0222329	0.0500524	0.0272842	-0.103056	0.103056	0.0818886	0.121558	0.599244	0.683355	0.358235	0.616657	0.0580257	0.0580257	turquoise
EXOC3L1	0.0294283	0.189072	0.0423612	-0.0249539	0.067629	0.0163224	0.0204417	-0.0204417	0.589233	0.000465359	0.43691	0.647079	0.214234	0.764606	0.707646	0.707646	grey
ACOX3	0.0547825	0.00737908	-0.0454539	-0.0514529	-0.0422155	-0.0380934	-0.107977	0.107977	0.314569	0.892325	0.404149	0.344927	0.43849	0.484529	0.0469733	0.0469733	turquoise
PPP2R3C	0.085118	0.00641922	0.153248	0.109395	-0.0153051	0.073339	0.0879697	-0.0879697	0.117761	0.906262	0.00468549	0.0441374	0.778885	0.177935	0.105911	0.105911	turquoise
KAT6B	-0.0487088	-0.0720312	0.119687	0.127192	-0.0450156	0.134777	0.0366526	-0.0366526	0.371299	0.185817	0.0275628	0.0191433	0.4087	0.0130032	0.501215	0.501215	turquoise
LAIR1	0.0014468	-0.00758869	0.201459	0.0818603	0.0277878	0.0115972	0.325514	-0.325514	0.978827	0.889285	0.00018853	0.132539	0.610166	0.831526	8.29318e-10	8.29318e-10	magenta
COL6A2	0.0400951	-0.105981	0.119568	0.0228834	0.0118153	0.0148495	0.615153	-0.615153	0.461854	0.0512227	0.0277185	0.674612	0.828405	0.785304	1.12668e-36	1.12668e-36	yellow
SPESP1	0.0450639	-0.0469895	-0.0833256	-0.0215915	-0.0476814	-0.0718154	0.0678155	-0.0678155	0.408197	0.38844	0.125724	0.692017	0.381485	0.187142	0.212971	0.212971	grey
NSFL1C	0.0350729	0.142164	-0.0496796	-0.0602507	-0.00268306	-0.035512	-0.0849404	0.0849404	0.519852	0.00876253	0.36183	0.268622	0.960746	0.514636	0.118532	0.118532	blue
STC1	0.0106644	-0.00274125	0.0306581	0.0969255	0.0442031	0.0409813	0.204827	-0.204827	0.844897	0.959895	0.57376	0.0747175	0.417219	0.452006	0.000146059	0.000146059	darkturquoise
JPT2	-0.00283528	0.0129585	0.00792728	-0.0123341	0.0089395	-0.0126944	-0.129413	0.129413	0.95852	0.812098	0.884379	0.820995	0.86974	0.815859	0.0171265	0.0171265	blue
LYAR	-0.123049	0.0488537	0.0747962	-0.0106725	-0.0111357	0.0408764	-0.163665	0.163665	0.0234626	0.369877	0.169447	0.844781	0.838136	0.453166	0.00250554	0.00250554	blue
NFAM1	0.068228	0.00512366	0.151567	0.0618568	0.0732295	0.0309738	0.187792	-0.187792	0.210194	0.925118	0.00516571	0.256046	0.178585	0.569819	0.000509288	0.000509288	magenta
ADGRB1	0.00696664	-0.14306	0.0526666	-0.00431489	0.00590279	0.028975	0.25381	-0.25381	0.898309	0.00834284	0.333652	0.936911	0.913772	0.594984	2.20551e-06	2.20551e-06	black
DSN1	0.0333152	0.0691123	0.0292397	-0.010157	0.00609201	0.050265	-0.2587	0.2587	0.541	0.204331	0.591623	0.85219	0.91102	0.356194	1.37902e-06	1.37902e-06	blue
EGLN2	-0.0303868	-0.0196164	0.0355119	0.0122538	-0.00134412	0.0691568	0.10965	-0.10965	0.577157	0.71894	0.514638	0.822142	0.980329	0.204038	0.0436429	0.0436429	grey
ATP5PO	-0.0345897	-0.0142154	0.0518783	0.0211112	-0.0430492	-0.0148713	-0.200885	0.200885	0.525624	0.794263	0.340947	0.69853	0.429493	0.784996	0.000196838	0.000196838	grey
IL20RA	-0.00863943	0.105961	-0.0748015	-0.150333	0.0257715	-0.0968071	-0.135239	0.135239	0.874075	0.0512677	0.169417	0.00554591	0.636335	0.0750748	0.0126928	0.0126928	grey
WNT5B	-0.065283	-0.0229878	-0.0116391	0.0576135	-0.00201029	0.0306027	0.0410715	-0.0410715	0.230595	0.673214	0.830926	0.290175	0.970583	0.574452	0.45101	0.45101	lightyellow
PPM1L	-0.0121332	-0.0812033	0.120425	0.0152684	0.0173533	-0.00540158	0.0917801	-0.0917801	0.823863	0.135685	0.0266133	0.779401	0.750217	0.921069	0.0915703	0.0915703	brown
CRPPA	0.0450875	-0.094172	0.0576733	0.0314961	-0.0514559	-0.000970333	-0.0345328	0.0345328	0.407952	0.0833918	0.289673	0.563328	0.344899	0.985799	0.526305	0.526305	grey
ERAP2	-0.0307443	-0.0143956	0.118855	0.0635329	0.0179172	0.0873084	-0.000495625	0.000495625	0.572683	0.791714	0.0286674	0.243363	0.742383	0.108572	0.992746	0.992746	grey
MTHFR	0.0889301	-0.00275856	-0.0671816	0.0681106	0.0429221	0.0613761	-0.0737072	0.0737072	0.102139	0.959642	0.217288	0.210982	0.430858	0.259767	0.175761	0.175761	turquoise
LDLRAD2	0.025713	-0.100381	0.0879728	0.073248	0.0635199	0.0328192	0.40132	-0.40132	0.6371	0.0648847	0.105899	0.178475	0.24346	0.547043	1.50223e-14	1.50223e-14	brown
NUTM2G	0.132945	-0.0020413	0.0723357	0.0728228	0.0730862	0.0254116	0.0654837	-0.0654837	0.014301	0.97013	0.183959	0.181016	0.179439	0.641055	0.229162	0.229162	grey
TUBB3	-0.068348	-0.0583321	0.0102626	0.0210321	0.00633088	0.0527048	0.121076	-0.121076	0.209392	0.28419	0.850672	0.699604	0.907546	0.333301	0.0258	0.0258	grey
C1orf109	-0.054023	0.0672354	0.0559057	0.0145148	0.00530472	0.049853	-0.205951	0.205951	0.321335	0.216919	0.304734	0.790029	0.92248	0.360155	0.000134007	0.000134007	blue
NUP85	-0.0345344	0.136012	-0.0207706	-0.0138624	0.112613	0.00799505	-0.206751	0.206751	0.526286	0.0121879	0.703162	0.799261	0.0382323	0.883398	0.000126005	0.000126005	blue
TIMMDC1	-0.102784	0.0539945	-0.0259973	-0.0511079	-0.0631367	-0.0484117	-0.0862603	0.0862603	0.0586947	0.32159	0.63338	0.348176	0.24632	0.374227	0.112896	0.112896	grey
SMPX	-0.042014	-0.162985	0.00983661	-0.0354024	-0.018071	-0.0501226	0.170817	-0.170817	0.440682	0.00261296	0.856802	0.515936	0.740252	0.35756	0.00159576	0.00159576	brown
FAM90A1	-0.0361327	-0.0185073	-0.013079	0.00230547	-0.023957	0.0546512	-0.0434828	0.0434828	0.50731	0.734214	0.810384	0.966266	0.660279	0.315731	0.424857	0.424857	black
CP	-0.0599856	0.0586176	0.0414405	-0.0609637	0.0444355	-0.0170258	-0.0441021	0.0441021	0.270738	0.281836	0.446951	0.262988	0.414771	0.75478	0.418285	0.418285	grey
SLC37A4	0.0755047	0.0588923	-0.0873823	-0.00682826	-0.0279276	-0.00517454	-0.163518	0.163518	0.165431	0.279583	0.108272	0.900319	0.608369	0.924377	0.00252842	0.00252842	blue
SMYD2	0.0266738	0.063441	0.0148352	-0.0177459	0.00648289	-0.0227669	-0.132701	0.132701	0.624566	0.244046	0.785506	0.74476	0.905336	0.676175	0.0144819	0.0144819	orange
NUP42	0.0358688	0.0116716	0.0790759	0.0410159	0.053358	0.0770764	-0.192245	0.192245	0.510418	0.830461	0.146268	0.451624	0.327336	0.156778	0.000371136	0.000371136	blue
CLHC1	0.115269	0.0646837	0.0409139	-0.00924306	0.00999682	0.00480141	-0.0816614	0.0816614	0.033874	0.234913	0.452751	0.865358	0.854495	0.929815	0.133485	0.133485	turquoise
CENPA	-0.0641643	0.0764074	-0.0272465	-0.0265742	-0.0359121	0.0561147	-0.246542	0.246542	0.2387	0.160419	0.617144	0.62586	0.509908	0.302926	4.35538e-06	4.35538e-06	blue
KLHL25	0.00947029	-0.0213705	-0.145996	-0.0439695	-0.0725866	0.00120465	-0.0419931	0.0419931	0.862081	0.69501	0.00709002	0.419687	0.182439	0.98237	0.440909	0.440909	turquoise
CHEK1	-0.081521	0.0550255	0.0297023	-0.0492925	-0.0421314	0.0323955	-0.262645	0.262645	0.134156	0.312424	0.585769	0.365588	0.439404	0.552234	9.37574e-07	9.37574e-07	blue
TFAP2E	-0.0752423	0.1469	-0.0816	-0.00329646	-0.00368768	-0.0412765	-0.100853	0.100853	0.16691	0.00673953	0.133778	0.951781	0.946067	0.448752	0.0636293	0.0636293	grey
EXOSC10	0.00725563	0.078148	0.0241157	0.0470564	0.0371937	0.0499462	-0.189221	0.189221	0.894115	0.151077	0.658169	0.387764	0.494914	0.359256	0.000460471	0.000460471	turquoise
TUBB4A	-0.0415449	-0.0758723	0.0325069	-0.0318649	0.0139459	0.00692636	0.124324	-0.124324	0.445805	0.163376	0.550866	0.558766	0.798078	0.898894	0.0220513	0.0220513	salmon
TMEM80	-0.0167927	-0.0291443	0.039319	-0.0337335	-0.0275098	0.0247027	-0.00662911	0.00662911	0.758032	0.592834	0.470574	0.535929	0.613746	0.650394	0.903211	0.903211	turquoise
TMEM86B	-0.0467959	-0.0260152	-0.0326482	0.00193267	-0.027032	-0.0375953	-0.0684941	0.0684941	0.3904	0.633147	0.549136	0.971719	0.619919	0.490263	0.208417	0.208417	grey
RPIA	0.0391461	0.123985	0.0222313	-0.00648673	-0.0132462	-0.0252391	-0.253621	0.253621	0.472529	0.0224187	0.683377	0.905281	0.808007	0.643322	2.24543e-06	2.24543e-06	grey
GCHFR	-0.0121932	0.00586088	0.0532139	0.00636472	0.00827302	0.0605336	-0.106879	0.106879	0.823007	0.914382	0.328646	0.907054	0.879374	0.266377	0.0492742	0.0492742	red
2020-03-03	0.0541612	0.172341	0.0130534	-0.0366514	0.0417239	-0.0170208	-0.0152241	0.0152241	0.320097	0.00144616	0.810748	0.501228	0.443846	0.75485	0.780025	0.780025	grey
LY6E	-0.0911324	0.0701401	-0.00948939	-0.0104791	-0.00243027	0.0207613	0.0627453	-0.0627453	0.0938919	0.197664	0.861805	0.847559	0.964441	0.703288	0.249267	0.249267	grey
ECH1	-0.123892	0.0128481	-0.0173302	0.0175874	0.0678204	-0.0140167	-0.013999	0.013999	0.0225215	0.81367	0.750539	0.746962	0.212938	0.797076	0.797325	0.797325	grey
KAT5	0.003016	-0.0249725	0.0468455	-0.0224358	0.0235418	0.0405735	0.0609134	-0.0609134	0.955879	0.646833	0.389897	0.680623	0.665807	0.456522	0.263383	0.263383	blue
SETSIP	-0.0934571	-0.027799	0.0665166	-0.134725	0.0128385	0.00919457	0.0049145	-0.0049145	0.0857722	0.610022	0.221885	0.0130385	0.813807	0.866058	0.928167	0.928167	blue
JAK2	0.036566	0.0643078	0.132039	0.0264031	0.0317731	0.0442611	-0.0620221	0.0620221	0.502227	0.23765	0.0149836	0.628087	0.559899	0.416608	0.254775	0.254775	tan
TNFRSF13B	-0.000498374	-0.0826491	0.0241417	0.0707475	0.0138757	0.0410801	0.18997	-0.18997	0.992706	0.128836	0.657825	0.193801	0.799072	0.450916	0.000436641	0.000436641	green
CCDC71	-0.0695837	-0.037327	-0.0193257	-0.052902	0.0217107	-0.0284474	0.126172	-0.126172	0.201253	0.493367	0.722932	0.331492	0.690404	0.60171	0.0201364	0.0201364	turquoise
PEX3	0.0119497	-0.0459994	0.0931768	-0.0332619	0.014163	0.0415888	-0.132692	0.132692	0.826485	0.398526	0.0867204	0.541648	0.795004	0.445325	0.0144885	0.0144885	black
SIT1	-0.0938853	-0.0516469	0.0562156	-0.00351854	-0.0142946	0.0423209	0.091003	-0.091003	0.0843399	0.343109	0.302057	0.948537	0.793142	0.437347	0.0943613	0.0943613	red
KLK12	0.0186402	0.00514171	-0.103555	0.000564986	-0.0497751	-0.027439	-0.0293552	0.0293552	0.732378	0.924855	0.0568149	0.991731	0.360907	0.614659	0.590159	0.590159	pink
PCLO	-0.0638782	0.0192688	-0.00485957	0.0209639	-0.0132128	0.0475868	0.0656557	-0.0656557	0.240805	0.723715	0.928967	0.700532	0.808481	0.382432	0.227938	0.227938	cyan
IFNG	-0.0384488	0.0802362	0.101003	-0.0363546	-0.0302095	0.0766767	-0.0290501	0.0290501	0.48046	0.140421	0.0632334	0.504704	0.579382	0.158945	0.594029	0.594029	tan
PAK4	-0.0653283	-0.085661	0.0135558	-0.0735354	-0.0323451	0.0422734	-0.0789711	0.0789711	0.230271	0.115428	0.803609	0.176773	0.552852	0.437862	0.146805	0.146805	darkred
TNK2	-0.0892708	0.0353002	0.0312226	0.0632146	0.011919	0.0288432	0.0140485	-0.0140485	0.100827	0.517149	0.566723	0.245737	0.826923	0.596661	0.796625	0.796625	grey
CD300E	0.0761426	0.0949436	0.0153755	0.0615537	-0.034183	-0.00550233	0.139815	-0.139815	0.161877	0.0808829	0.777894	0.258388	0.530505	0.919602	0.00995369	0.00995369	darkorange
NHLRC2	0.0341919	0.0374426	0.120816	0.0347121	-0.0392788	0.0712974	-0.0614452	0.0614452	0.530398	0.492028	0.0261218	0.524158	0.471029	0.190351	0.259229	0.259229	turquoise
CLIC1	-0.0854789	0.119372	-0.0328797	-0.0344172	0.00935015	-0.0539706	-0.207545	0.207545	0.116207	0.0279765	0.546304	0.527691	0.863813	0.321805	0.000118508	0.000118508	darkgreen
EIF3F	-0.0227325	-0.0862616	0.124883	0.0258296	0.0020485	0.106799	0.109445	-0.109445	0.676637	0.11289	0.0214558	0.635575	0.970024	0.0494455	0.0440399	0.0440399	blue
N4BP2	0.0219535	-0.0237217	0.11369	0.0688038	-0.00480552	0.0759091	-0.0915811	0.0915811	0.687122	0.66341	0.03641	0.206362	0.929755	0.163171	0.0922788	0.0922788	turquoise
PVR	-0.0708767	-0.0939452	0.0741376	-0.0538357	-0.0108943	0.0592384	-0.0587733	0.0587733	0.192986	0.0841413	0.173245	0.323017	0.841598	0.276762	0.280558	0.280558	darkred
PLD6	0.0482253	0.0777637	0.0636243	0.019074	-0.0433248	-0.00516412	-0.0692651	0.0692651	0.376072	0.153103	0.242684	0.726396	0.426543	0.924529	0.203329	0.203329	blue
MTURN	0.0204534	-0.114443	-0.0170257	0.0455194	0.00399195	-0.0915297	0.161404	-0.161404	0.707485	0.035182	0.754781	0.403471	0.941624	0.0924622	0.00287924	0.00287924	brown
GRN	0.0364539	0.0659704	0.0440898	0.00606875	0.0646755	0.0380053	0.0519913	-0.0519913	0.50354	0.225712	0.418415	0.911358	0.234972	0.48554	0.339896	0.339896	turquoise
EBI3	-0.0968105	-0.0156719	0.0445949	0.00557167	-0.0223838	0.0559719	0.0413308	-0.0413308	0.0750645	0.773728	0.413098	0.918592	0.681323	0.304161	0.448155	0.448155	red
DPH5	-0.0710398	-0.0143768	0.0450691	0.029028	0.0668996	0.0571515	-0.119353	0.119353	0.191961	0.791979	0.408143	0.594311	0.21923	0.294067	0.0280018	0.0280018	blue
BTN3A2	0.0491627	0.0773193	0.134156	0.0728277	0.00513479	0.135911	0.00628532	-0.00628532	0.366853	0.155471	0.0134311	0.180986	0.924956	0.0122528	0.908208	0.908208	green
NSUN2	-0.0234238	0.11632	0.0664044	0.0028648	0.00652371	0.0610236	-0.207694	0.207694	0.667382	0.0322701	0.222668	0.958089	0.904743	0.262518	0.000117148	0.000117148	blue
FAM120AOS	0.0675397	-0.0420662	0.084512	0.0276756	0.0163681	0.0324697	-0.00111173	0.00111173	0.214842	0.440113	0.120408	0.61161	0.763966	0.551322	0.98373	0.98373	turquoise
XPA	-0.0654458	0.00612178	0.114481	-0.0147674	-0.0302026	-0.000263044	0.0110362	-0.0110362	0.229432	0.910587	0.0351205	0.786462	0.579469	0.99615	0.839562	0.839562	grey
PPM1N	-0.122072	0.00993303	0.0447015	0.0355388	-0.04275	0.109165	-0.0115595	0.0115595	0.0245955	0.855414	0.411981	0.514318	0.43271	0.0445875	0.832065	0.832065	grey
MYO1C	-0.0304558	0.0562503	0.0606947	0.056176	-0.0397197	0.0164886	0.182225	-0.182225	0.576291	0.301758	0.265104	0.302398	0.46606	0.762281	0.000748964	0.000748964	brown
DCAF12	-0.0137769	0.0734469	-0.0704627	-0.0456908	0.0260936	0.0339879	-0.187799	0.187799	0.800473	0.177296	0.195606	0.401701	0.632122	0.532855	0.000509036	0.000509036	skyblue
ATAD3B	-0.00309756	0.127557	-0.0274573	0.0380548	0.127901	0.0453546	-0.29043	0.29043	0.954687	0.0187983	0.614423	0.484972	0.0184784	0.405177	5.16762e-08	5.16762e-08	blue
ZNF460	0.0498588	-0.0199359	0.121004	0.049303	0.0016917	0.104968	0.056999	-0.056999	0.360099	0.714559	0.0258886	0.365485	0.975244	0.0534995	0.295359	0.295359	turquoise
TM4SF4	-0.0174933	-0.0982767	0.0115563	0.0371808	-0.010831	0.0530962	-0.023684	0.023684	0.74827	0.0707375	0.832112	0.495063	0.842506	0.329718	0.663912	0.663912	grey
PTCRA	-0.00900516	-0.0841688	0.119219	0.0425622	-0.00331152	0.00731054	0.137483	-0.137483	0.868792	0.121928	0.0281796	0.434736	0.951561	0.893319	0.011276	0.011276	magenta
ZNF440	0.0263922	0.0561592	0.040187	-0.0135162	-0.0170216	0.0429793	-0.233919	0.233919	0.628229	0.302543	0.460826	0.804171	0.754839	0.430243	1.352e-05	1.352e-05	turquoise
CDC42	-0.0822866	0.0178881	0.0363095	0.0539789	0.0155028	-0.0218972	0.00323843	-0.00323843	0.130527	0.742787	0.505233	0.32173	0.776105	0.687883	0.952629	0.952629	blue
ZNF777	-0.0511502	0.0498384	0.0662364	-0.0911189	0.0545242	0.0232069	-0.0231859	0.0231859	0.347776	0.360296	0.223843	0.0939408	0.316859	0.67028	0.670561	0.670561	blue
SLC31A2	-0.0182172	0.106682	0.0472294	-0.00401602	-0.0275471	-0.0568145	0.0497027	-0.0497027	0.738227	0.0496952	0.38602	0.941273	0.613265	0.296927	0.361607	0.361607	magenta
EIF4EBP3	0.0376927	-0.0617801	-0.106844	-0.0413063	0.060095	-0.0754767	0.105966	-0.105966	0.489139	0.256637	0.0493471	0.448424	0.269863	0.165589	0.0512576	0.0512576	grey
SLC25A24	-0.0133516	0.0639826	0.121966	0.0772204	0.0184661	0.0835082	-0.234264	0.234264	0.806509	0.240036	0.0247216	0.156002	0.734783	0.124894	1.31178e-05	1.31178e-05	turquoise
PTER	-0.00105933	0.0701964	0.136259	0.0229428	-0.0126526	0.0589603	-0.277517	0.277517	0.984496	0.197304	0.0120306	0.673815	0.816454	0.279027	2.06803e-07	2.06803e-07	turquoise
GAB2	0.0535871	0.0332525	0.0354975	-0.0151487	-0.0253395	0.0384446	-0.000139792	0.000139792	0.32526	0.541762	0.514808	0.781087	0.642002	0.480508	0.997954	0.997954	grey
NXT1	0.015703	0.0846442	0.000149106	-0.101031	-0.0350876	-0.0108599	-0.0501358	0.0501358	0.773291	0.119827	0.997818	0.0631601	0.519677	0.842092	0.357433	0.357433	blue
SLC35B4	0.011574	-0.0365326	0.153009	0.165267	0.0314159	0.0846662	0.140458	-0.140458	0.831858	0.502618	0.00475131	0.00226824	0.564322	0.11973	0.00961415	0.00961415	turquoise
WDR3	-0.112917	0.0262623	0.0626397	0.011394	-0.0315168	0.0497204	-0.182419	0.182419	0.0377094	0.629921	0.250066	0.834434	0.56307	0.361436	0.000739139	0.000739139	blue
MMP23B	0.0227719	-0.154863	0.0435653	0.0185621	-0.0582395	-0.0427758	0.483119	-0.483119	0.676107	0.00426227	0.423978	0.733456	0.284957	0.432432	3.1558e-21	3.1558e-21	yellow
CRADD	0.0260829	0.0512908	-0.0598088	-0.0818448	0.000675391	-0.0410436	-0.065625	0.065625	0.632262	0.346451	0.272155	0.132612	0.990115	0.451318	0.228156	0.228156	grey
ZHX2	0.0310983	-0.0912467	0.143873	0.0945644	0.0460809	0.136815	0.164885	-0.164885	0.568268	0.0934789	0.00797742	0.0821082	0.397689	0.0116823	0.00232283	0.00232283	green
TGM3	0.012021	-0.0214678	-0.116847	-0.0343335	-0.0363689	-0.0399183	-0.0866169	0.0866169	0.825465	0.693693	0.0314921	0.528696	0.504536	0.463832	0.11141	0.11141	pink
PRDM11	0.036459	-0.0723867	0.0987643	0.0198873	-0.0507845	0.065097	0.115035	-0.115035	0.50348	0.183649	0.0693444	0.715225	0.351238	0.231929	0.0342406	0.0342406	grey
GNA11	-0.0805567	0.0300522	-0.00810755	-0.0514719	0.0217155	-0.0199728	-0.136954	0.136954	0.138837	0.581359	0.881769	0.344749	0.690339	0.714055	0.0115969	0.0115969	turquoise
BTAF1	0.0296204	0.0727156	0.113137	0.0394045	0.00366854	0.109483	-0.119737	0.119737	0.586803	0.181661	0.037337	0.469609	0.946346	0.0439667	0.0274968	0.0274968	turquoise
CCDC136	-0.0286939	-0.139279	0.0597641	0.0155227	0.038261	-0.0297525	0.224118	-0.224118	0.598563	0.0102451	0.272514	0.775824	0.482607	0.585135	3.12298e-05	3.12298e-05	brown
ZNF324B	0.00446371	-0.049642	0.0218503	-0.0555922	0.00932231	0.0550213	0.0159389	-0.0159389	0.93474	0.362194	0.688516	0.307458	0.864215	0.31246	0.76998	0.76998	turquoise
TNKS1BP1	0.108717	-0.0467964	-0.046825	0.00174708	-0.0216903	0.0105147	0.184614	-0.184614	0.0454743	0.390395	0.390105	0.974433	0.69068	0.847048	0.000635569	0.000635569	turquoise
L3MBTL4	-0.0774017	-0.0119095	-0.0295103	0.0755191	-0.0149547	0.0267807	0.00973085	-0.00973085	0.15503	0.827058	0.588196	0.165351	0.783821	0.623177	0.858325	0.858325	midnightblue
PPP1R2B	0.0106971	-0.0352255	-0.0486473	-0.0913748	-0.00745521	-0.101113	0.114598	-0.114598	0.844428	0.518037	0.371905	0.0930177	0.891221	0.0629458	0.0349324	0.0349324	grey
SEPTIN5	-0.081684	-0.042896	-0.0702637	-0.0356977	-0.0217177	-0.025846	0.273268	-0.273268	0.133377	0.431139	0.196874	0.512438	0.690309	0.635359	3.21455e-07	3.21455e-07	grey
C3	0.00680057	-0.131079	0.194153	0.10334	0.00593171	0.107704	0.276689	-0.276689	0.900721	0.0157382	0.000323381	0.0573352	0.913352	0.0475359	2.25489e-07	2.25489e-07	yellow
TCOF1	-0.0578003	0.014063	0.0702484	0.0437883	0.0516163	0.125276	-0.0950811	0.0950811	0.288611	0.79642	0.196971	0.421608	0.343395	0.0210465	0.0804423	0.0804423	blue
TRIM22	0.0106449	-0.00598805	0.193991	0.0884042	0.0651466	0.0874432	0.220681	-0.220681	0.845178	0.912532	0.000327216	0.104191	0.231573	0.108025	4.1528e-05	4.1528e-05	green
TMEM26	0.106953	-0.0360956	0.128948	0.0241987	-0.0239186	0.0137106	0.0421016	-0.0421016	0.0491151	0.507745	0.0175326	0.657069	0.660789	0.801413	0.439728	0.439728	black
THAP6	-0.0227625	0.0456315	0.11712	-0.00382729	-0.0236553	0.0805402	-0.022228	0.022228	0.676233	0.402313	0.0310944	0.944028	0.664293	0.138919	0.683421	0.683421	turquoise
DHCR7	0.0901735	0.102621	-0.0135595	0.0118958	0.0280157	0.0363761	-0.190514	0.190514	0.0974153	0.0590975	0.803557	0.827256	0.607238	0.504451	0.00042008	0.00042008	blue
DEF8	-0.046137	-0.00351725	0.137315	0.0692433	0.0590234	0.0417129	0.0587544	-0.0587544	0.397115	0.948556	0.0113772	0.203472	0.278513	0.443966	0.280713	0.280713	grey
NUDT12	0.018537	0.0662254	0.0341552	0.0197191	-0.097595	-0.0571034	-0.215476	0.215476	0.733803	0.22392	0.530841	0.71753	0.0727233	0.294474	6.34045e-05	6.34045e-05	grey
MYL12B	-0.110323	0.0751464	-0.00258953	0.0185316	-0.0598962	-0.0128417	-0.0600006	0.0600006	0.0423608	0.167453	0.962113	0.733878	0.271454	0.813761	0.270618	0.270618	grey
GLIS1	0.0750152	-0.0601208	0.01743	-0.0121094	-0.00419862	0.0245175	0.339342	-0.339342	0.168198	0.269658	0.749151	0.824203	0.938608	0.652843	1.39677e-10	1.39677e-10	yellow
RAB3A	-0.107521	0.0670267	-0.0354368	-0.078171	-0.0203637	-0.0446143	0.0332322	-0.0332322	0.0479185	0.218353	0.515528	0.150956	0.708709	0.412895	0.542009	0.542009	grey
GDA	0.0380432	0.13807	0.0870782	0.0368286	0.0250021	0.147872	-0.146671	0.146671	0.485105	0.0109293	0.10951	0.499161	0.646443	0.00638044	0.00682709	0.00682709	grey
USP34	0.0490365	0.0294838	0.105868	0.0881913	-0.000936212	0.0807382	-0.0306385	0.0306385	0.368086	0.58853	0.0514727	0.105031	0.986298	0.137947	0.574006	0.574006	turquoise
PLAAT4	-0.0913783	0.0318799	0.0420129	-0.118503	0.0837901	0.0405198	0.096392	-0.096392	0.093005	0.558581	0.440693	0.0291464	0.123621	0.45712	0.0763382	0.0763382	tan
LIN54	-0.0494161	0.0208403	0.117453	0.00259647	-0.0340719	0.062081	-0.187754	0.187754	0.364385	0.702213	0.0306156	0.962011	0.531843	0.254324	0.000510663	0.000510663	blue
TAF1C	0.0969786	0.128671	0.0490164	0.111585	0.0753063	0.0921659	-0.115461	0.115461	0.0745576	0.0177788	0.368283	0.0400414	0.166548	0.0902092	0.0335763	0.0335763	turquoise
RHOH	-0.0735316	-0.0571522	0.075436	0.039038	0.0100445	0.0425039	0.142767	-0.142767	0.176795	0.294061	0.165817	0.473754	0.85381	0.435366	0.00847828	0.00847828	green
IGF2BP2	0.0473342	-0.0167062	0.0895348	0.0681491	-0.00587671	0.0776935	-0.0457165	0.0457165	0.384965	0.759239	0.0998197	0.210724	0.914152	0.153475	0.401436	0.401436	blue
GABARAP	-0.0784038	-0.0377643	0.0439056	0.0352105	-0.0832687	-0.0657047	0.318881	-0.318881	0.149739	0.488314	0.420363	0.518215	0.125983	0.227591	1.88891e-09	1.88891e-09	grey
LMCD1	0.063312	-0.0341865	0.0791662	-0.0141186	-0.0457383	-0.00625605	0.409041	-0.409041	0.245009	0.530464	0.145807	0.795632	0.401211	0.908634	4.17783e-15	4.17783e-15	lightgreen
ACBD3	0.0330297	0.0598598	0.0814518	0.0274957	0.021892	0.0583832	-0.154133	0.154133	0.544474	0.271746	0.134488	0.613927	0.687954	0.283769	0.00444908	0.00444908	turquoise
MZT1	0.000875388	0.0624482	0.0478179	-0.0320644	-0.0433117	0.0113801	-0.220022	0.220022	0.987188	0.251519	0.380122	0.556305	0.426683	0.834634	4.3841e-05	4.3841e-05	blue
RELT	-0.0244017	0.0919379	0.0593507	0.0171771	-0.000398961	0.0974787	0.0317528	-0.0317528	0.654377	0.0910118	0.275851	0.752671	0.994161	0.0730665	0.560151	0.560151	red
PLA2G10	0.0349226	0.00694351	-0.0510356	0.0821624	-0.0344899	-0.029084	-0.0678976	0.0678976	0.521643	0.898645	0.348859	0.131111	0.526819	0.593599	0.212416	0.212416	grey
USP21	0.0358022	0.00601299	-0.0630246	-0.000657966	0.0745704	0.000336556	-0.0156516	0.0156516	0.511204	0.912169	0.247162	0.99037	0.170742	0.995074	0.774012	0.774012	darkgreen
MAP1LC3B	-0.0770246	0.0597341	0.242989	0.122309	0.0809689	0.00983795	0.149618	-0.149618	0.157057	0.272755	6.0284e-06	0.0243168	0.136821	0.856783	0.00577782	0.00577782	turquoise
DCTN1	0.0594	-0.0103584	0.028935	0.0859164	0.0309191	0.0274313	0.0920176	-0.0920176	0.275452	0.849294	0.595493	0.114344	0.570501	0.614759	0.0907307	0.0907307	turquoise
USF1	-0.0732849	0.060027	0.0053577	-0.0372201	0.0673959	-0.0291892	-0.0234444	0.0234444	0.178256	0.270406	0.921708	0.494607	0.215822	0.592263	0.667107	0.667107	blue
CLSTN2	0.00761188	0.0106424	-0.0892354	-0.0816769	-0.0418938	-0.104719	0.101744	-0.101744	0.888949	0.845213	0.100963	0.133411	0.441991	0.0540729	0.0613123	0.0613123	orange
ZNF540	-0.0239909	-0.146559	0.0977569	0.0645257	0.0305535	0.00332069	0.254621	-0.254621	0.659828	0.00687013	0.0722476	0.23606	0.575069	0.951427	2.04166e-06	2.04166e-06	brown
CCDC93	0.0694173	0.101072	0.078634	0.0363692	0.0296907	0.0671931	-0.165398	0.165398	0.202335	0.0630515	0.148543	0.504533	0.585916	0.21721	0.00224966	0.00224966	turquoise
MINAR1	0.0683601	0.053147	0.0534172	0.0372458	-0.0272243	0.0182106	0.00468777	-0.00468777	0.209311	0.329255	0.326799	0.494309	0.617431	0.738317	0.931472	0.931472	turquoise
ERI2	0.000294436	0.081956	0.125944	0.033806	-0.00971171	0.0803437	-0.31473	0.31473	0.995691	0.132085	0.0203653	0.535051	0.858601	0.139888	3.13008e-09	3.13008e-09	turquoise
AC112229.3	-0.0614693	0.0110595	0.155935	-0.0184133	0.0390511	-0.0194828	0.0713564	-0.0713564	0.259043	0.839228	0.00400098	0.735513	0.473606	0.720773	0.189983	0.189983	grey
TMEM160	-0.074358	-0.0186481	-0.0421151	-0.0527952	-0.0499906	-0.0386274	0.0509948	-0.0509948	0.171967	0.732268	0.439581	0.332471	0.358829	0.478421	0.349245	0.349245	grey
AC005041.1	0.0355203	-0.0529779	-0.0942709	0.0565187	0.00599105	0.0383539	0.136534	-0.136534	0.514538	0.330798	0.083067	0.299454	0.912488	0.481544	0.0118571	0.0118571	grey
NDUFB5	-0.0207035	-0.0245021	0.0678326	0.0387809	-0.0213654	0.0525006	-0.114656	0.114656	0.704075	0.653048	0.212855	0.476674	0.69508	0.33518	0.0348402	0.0348402	grey
TMEM259	0.021353	0.0574028	0.0154267	-0.0783178	-0.0366568	0.0059819	-0.00260488	0.00260488	0.695248	0.291946	0.777174	0.150188	0.501166	0.912621	0.961888	0.961888	blue
CALM2	0.0169182	0.122711	0.15173	0.106703	0.026729	0.0454278	-0.13063	0.13063	0.75628	0.0238493	0.00511726	0.049651	0.623849	0.404419	0.0161022	0.0161022	turquoise
INTS7	0.0442268	0.0354097	0.0652742	0.0246535	0.0210316	0.0747374	-0.235247	0.235247	0.416969	0.515849	0.230658	0.651045	0.699611	0.169784	1.20356e-05	1.20356e-05	turquoise
CIAPIN1	0.0371419	0.118003	0.0193321	0.0304306	0.0617615	0.0459498	-0.209358	0.209358	0.495514	0.0298376	0.722844	0.576608	0.256781	0.399035	0.000102931	0.000102931	blue
SAFB2	0.00220566	0.0346592	0.129788	0.00837236	0.0287775	0.0984649	-0.0869679	0.0869679	0.967726	0.524791	0.0168052	0.877937	0.597497	0.0701969	0.109962	0.109962	blue
F3	-0.0530415	-0.0103751	-0.081902	0.00864542	-0.06016	-0.045252	0.0476275	-0.0476275	0.330218	0.849055	0.132341	0.873989	0.269344	0.406241	0.382024	0.382024	grey
FAM3B	0.030495	0.0259316	-0.157398	-0.0907312	0.0083766	-0.0975286	-0.187075	0.187075	0.5758	0.634239	0.00366744	0.0953534	0.877876	0.0729189	0.000535545	0.000535545	grey
ARRDC3	0.011377	-0.0891139	0.125962	0.106101	0.0619906	0.0322243	0.258153	-0.258153	0.834678	0.10143	0.0203468	0.0509584	0.255018	0.554336	1.45408e-06	1.45408e-06	turquoise
RPL27	-0.0560737	-0.0777155	0.0772159	-0.0668663	-0.00209722	0.0528633	0.0949264	-0.0949264	0.303281	0.153359	0.156026	0.21946	0.969312	0.331847	0.0809383	0.0809383	grey
UCHL1	-0.139128	0.0173364	-0.0393036	-0.0561983	-0.0350692	-0.0376669	0.140843	-0.140843	0.0103281	0.750453	0.470748	0.302206	0.519896	0.489437	0.00941584	0.00941584	cyan
AADAC	0.046441	-0.0666306	0.0134078	0.0392588	-0.0228612	-0.00192248	-0.048956	0.048956	0.394008	0.221093	0.805712	0.471255	0.67491	0.971868	0.368873	0.368873	grey
MRPL40	-0.0475992	-0.00265274	-0.0346589	-0.0959095	0.0013021	-0.0774882	0.0462003	-0.0462003	0.382307	0.961189	0.524795	0.0778287	0.980944	0.154568	0.396466	0.396466	grey
SH3TC1	0.0894345	-0.0413523	-0.0367071	0.0588737	-0.0294971	0.0720736	0.0181658	-0.0181658	0.100201	0.447919	0.500578	0.279735	0.588362	0.185557	0.738938	0.738938	turquoise
HDAC11	0.0220847	-0.00560929	-0.0490196	-0.0997911	-0.0394224	-0.046836	0.0401132	-0.0401132	0.685353	0.918045	0.368251	0.0664841	0.469408	0.389994	0.461651	0.461651	grey
STX11	-0.00387184	0.00249347	0.196491	0.058374	0.0151428	0.0749546	0.184046	-0.184046	0.943378	0.963517	0.000272679	0.283844	0.78117	0.168543	0.000660982	0.000660982	magenta
CPD	0.0799239	0.0158858	0.0446018	0.0301227	-0.0399196	-0.0124267	-0.161092	0.161092	0.141977	0.770726	0.413026	0.580473	0.463818	0.819674	0.0029345	0.0029345	turquoise
CDV3	-0.00478388	-0.00815836	0.173755	0.129164	-0.011092	0.144024	-0.0456197	0.0456197	0.930071	0.881034	0.00131899	0.0173427	0.838762	0.00791153	0.402435	0.402435	turquoise
THRA	0.0788689	-0.00529297	-0.0108335	-0.00112651	0.0102419	0.0473835	-0.0978626	0.0978626	0.147331	0.922651	0.84247	0.983513	0.850969	0.38447	0.0719385	0.0719385	grey
C2orf72	-0.00237826	0.0341	0.0414665	0.0432555	0.00252606	0.0396396	-0.22128	0.22128	0.965202	0.531505	0.446665	0.427284	0.963041	0.466961	3.95283e-05	3.95283e-05	grey
SLC4A11	0.0762408	0.0788143	-0.0193798	-0.0499454	0.0145401	0.00855535	-0.138149	0.138149	0.161335	0.147612	0.722188	0.359264	0.789672	0.875291	0.0108836	0.0108836	grey
BAZ2B	0.111927	0.0580489	0.0923068	0.0816389	0.0255131	0.0265826	-0.0537641	0.0537641	0.0394318	0.286539	0.0897165	0.133593	0.639722	0.625751	0.323663	0.323663	turquoise
MAP6D1	-0.10025	0.00744648	0.113989	-0.00952743	0.0227565	0.0943173	-0.0239602	0.0239602	0.0652377	0.891347	0.0359177	0.861257	0.676314	0.0829149	0.660236	0.660236	darkred
NBPF15	0.0523106	0.0316569	0.0846955	0.0898292	0.118619	0.0974164	0.0919197	-0.0919197	0.336934	0.561336	0.119601	0.0987055	0.0289871	0.0732509	0.0910761	0.0910761	turquoise
PYM1	-0.0838646	-0.00724647	0.0267273	-0.0172281	-0.0282493	0.0307086	-0.123759	0.123759	0.123286	0.894248	0.623871	0.751961	0.604244	0.573129	0.0226671	0.0226671	blue
ZNF713	0.161978	-0.0240706	0.0441217	-0.0360569	0.014036	-0.00963194	0.0368703	-0.0368703	0.00277977	0.658769	0.418078	0.508202	0.796802	0.85975	0.498675	0.498675	turquoise
PIGK	0.036497	0.034165	0.142379	0.0597171	0.0211598	0.0290386	-0.0505829	0.0505829	0.503035	0.530722	0.00866035	0.272892	0.697869	0.594175	0.353156	0.353156	turquoise
LAMC1	0.0574395	-0.0513234	0.0681002	0.0734607	0.00473863	0.0130297	0.254788	-0.254788	0.291637	0.346144	0.211052	0.177214	0.930731	0.811086	2.00929e-06	2.00929e-06	salmon
TULP4	0.0349204	0.0527001	0.104398	-0.0178872	-0.00487376	0.0411518	-0.104957	0.104957	0.52167	0.333344	0.0548186	0.7428	0.92876	0.450125	0.053524	0.053524	turquoise
RNF183	0.00054561	-0.0358122	-0.0798834	-0.0638297	-0.0544513	-0.0572996	-0.162613	0.162613	0.992014	0.511085	0.142179	0.241164	0.317507	0.292816	0.00267346	0.00267346	grey
ANKRD22	-0.076742	0.0427305	-0.0200535	-0.100847	0.0264406	-0.0363181	-0.159851	0.159851	0.158589	0.43292	0.71295	0.0636443	0.627598	0.505131	0.00316438	0.00316438	grey
GGT5	-0.0234659	-0.128671	0.114165	0.08696	0.021343	0.0678528	0.555099	-0.555099	0.66682	0.0177785	0.035631	0.109994	0.695384	0.212718	8.59395e-29	8.59395e-29	lightyellow
ACTA1	0.0537598	-0.127578	0.0149675	-0.0341226	-0.0450344	-0.0282366	0.259191	-0.259191	0.323701	0.0187788	0.78364	0.531233	0.408505	0.604407	1.31484e-06	1.31484e-06	brown
OPA1	-0.00379161	0.03492	0.162898	0.0846437	0.00327447	0.109365	-0.164288	0.164288	0.944549	0.521675	0.002627	0.119829	0.952102	0.0441965	0.00241074	0.00241074	turquoise
YWHAE	-0.0350503	0.125839	0.0175995	0.00601891	-0.0648261	0.0354873	-0.208403	0.208403	0.520122	0.0204706	0.746795	0.912083	0.233882	0.514929	0.000110883	0.000110883	blue
ZMYM6	0.0487639	0.0535164	0.118001	0.0906518	0.0260703	0.0601558	-0.103655	0.103655	0.370758	0.3259	0.0298403	0.0956449	0.632428	0.269378	0.0565746	0.0565746	turquoise
RPL13	-0.062968	-0.0743828	0.0810382	0.0352312	-0.0148651	0.0615393	0.102487	-0.102487	0.247587	0.171823	0.136485	0.517969	0.785084	0.258499	0.0594329	0.0594329	grey
LRRC14	0.00112025	0.137333	0.00059183	-0.0206704	0.038748	0.0514533	-0.139526	0.139526	0.983605	0.0113661	0.991338	0.704527	0.477048	0.344923	0.0101095	0.0101095	blue
C18orf21	-0.102631	0.0678226	0.132775	-0.0124901	-0.0415428	0.018523	-0.089922	0.089922	0.0590733	0.212922	0.0144265	0.81877	0.445828	0.733997	0.0983566	0.0983566	grey
POLG2	0.0443493	0.0623932	-0.00468228	0.0645532	0.113861	0.018072	-0.104992	0.104992	0.415679	0.251938	0.931552	0.235861	0.0361283	0.740238	0.0534446	0.0534446	turquoise
ADNP	0.0825145	0.052814	0.0786253	0.0601015	-0.0147709	0.0807615	-0.160384	0.160384	0.129462	0.332299	0.148588	0.269812	0.786413	0.137833	0.00306377	0.00306377	turquoise
FLAD1	-0.0911257	0.00552357	-0.0504999	-0.0256899	0.0401289	0.00720298	-0.145448	0.145448	0.0939163	0.919293	0.353948	0.637404	0.461475	0.894879	0.00731033	0.00731033	blue
CIAO2A	-0.0799573	0.144878	0.0325206	-0.0181078	-0.000184908	0.011414	-0.314945	0.314945	0.141809	0.0075457	0.550698	0.739741	0.997294	0.834148	3.04971e-09	3.04971e-09	blue
CAMK1D	-0.0222253	-0.108739	0.13927	0.00217211	0.0439293	0.0887928	0.2319	-0.2319	0.683458	0.0454321	0.0102501	0.968217	0.420112	0.102672	1.61128e-05	1.61128e-05	yellow
JDP2	0.0137042	-0.0538797	0.0273261	-0.036627	-0.00593661	-0.0458583	0.287638	-0.287638	0.801504	0.322622	0.616117	0.501514	0.91328	0.399975	7.0159e-08	7.0159e-08	yellow
KLC2	-0.104153	0.0164547	0.0196437	-0.0519483	0.0137557	0.0629888	0.0307662	-0.0307662	0.0553917	0.762755	0.718564	0.340296	0.800774	0.24743	0.572409	0.572409	blue
RALGAPB	0.111481	0.0564616	0.112774	0.0954346	0.0131549	0.123687	-0.107855	0.107855	0.0402283	0.299943	0.0379544	0.0793186	0.809305	0.0227471	0.0472241	0.0472241	turquoise
SFTPA2	0.0243095	-0.0811858	0.0677593	0.0614842	0.0502366	0.0840161	-0.0670212	0.0670212	0.655598	0.135769	0.213351	0.258927	0.356466	0.122608	0.218391	0.218391	grey
THAP10	-0.0307088	0.00559077	-0.0800671	-0.0583361	-0.0329346	-0.0478872	-0.090797	0.090797	0.573126	0.918314	0.141262	0.284158	0.545635	0.379432	0.0951126	0.0951126	black
CRYZ	0.0161344	0.0149253	0.0579112	0.108069	0.0397552	0.0744671	-0.11419	0.11419	0.767239	0.784235	0.287685	0.0467844	0.465662	0.171337	0.0355903	0.0355903	turquoise
EXOC7	0.112522	-0.0119926	0.00424395	0.0142304	0.0506183	0.013682	0.107322	-0.107322	0.0383886	0.825871	0.937947	0.79405	0.352819	0.801819	0.0483347	0.0483347	turquoise
DHRS2	0.0582948	0.0172014	-0.0360999	-0.0772973	-0.0155305	0.0426133	-0.0104462	0.0104462	0.284499	0.752333	0.507695	0.155589	0.775715	0.434185	0.848032	0.848032	grey
BPNT1	-0.0437814	0.15357	-0.0100777	-0.013432	0.0309706	-0.0535252	-0.336225	0.336225	0.42168	0.00459815	0.853331	0.805367	0.569858	0.32582	2.10318e-10	2.10318e-10	grey
ANKRD11	0.0582665	0.0357698	0.166025	0.100782	0.106395	0.100501	0.0122814	-0.0122814	0.284733	0.511586	0.00216309	0.0638156	0.0503158	0.0645643	0.821748	0.821748	turquoise
SERTAD4	0.00772734	-0.162389	0.0302567	-0.0241866	0.0787933	-0.00893988	0.206116	-0.206116	0.887276	0.00271059	0.578789	0.657228	0.14772	0.869734	0.000132319	0.000132319	brown
TCHP	-0.0452341	0.0431478	0.032812	-0.0610652	0.0330839	0.0606687	-0.0969693	0.0969693	0.406427	0.428436	0.547132	0.262192	0.543814	0.26531	0.0745857	0.0745857	blue
WWC3	0.0247872	-0.100974	0.159016	0.00757493	0.0886113	0.0588059	0.377949	-0.377949	0.649279	0.0633091	0.00332806	0.889485	0.103379	0.28029	5.93577e-13	5.93577e-13	brown
TCTEX1D2	-0.0226719	-0.0180158	-0.00777247	-0.0241317	0.0289378	0.00240556	0.0116604	-0.0116604	0.67745	0.741017	0.886622	0.657957	0.595457	0.964803	0.830622	0.830622	grey
HOXB13	-0.00282242	0.19972	-0.140302	0.0234351	0.0760557	-0.00175759	-0.230297	0.230297	0.958708	0.000214744	0.00969587	0.667231	0.162358	0.97428	1.85013e-05	1.85013e-05	grey
RNF181	-0.0712342	0.00148469	-0.0591001	-0.0362649	-0.01512	0.0227563	0.0773475	-0.0773475	0.190745	0.978272	0.277888	0.505756	0.781492	0.676317	0.15532	0.15532	grey
MLLT10	0.0595002	0.0514146	0.137855	0.0686002	-0.00137338	0.0930765	-0.0636838	0.0636838	0.274641	0.345286	0.0110552	0.207711	0.979901	0.0870616	0.242243	0.242243	turquoise
CACNA1H	-0.0175559	-0.134066	0.111461	0.030914	-0.0122134	0.0160018	0.381201	-0.381201	0.7474	0.013494	0.0402648	0.570565	0.822719	0.769098	3.6206e-13	3.6206e-13	brown
FMR1	0.0828753	0.0560867	0.125713	0.0217078	0.00308675	0.0901347	-0.122367	0.122367	0.127788	0.303168	0.0205987	0.690444	0.954845	0.0975599	0.0242481	0.0242481	turquoise
TTLL3	0.0800057	0.0338371	0.017882	0.0284477	0.0570175	0.0595403	0.0726575	-0.0726575	0.141568	0.534676	0.742872	0.601706	0.295202	0.274317	0.18201	0.18201	turquoise
HEPH	-0.0662541	0.0938447	0.0464326	-0.0195508	-0.00275946	-0.013961	-0.0734362	0.0734362	0.223719	0.0844751	0.394093	0.719839	0.959629	0.797864	0.177359	0.177359	grey
PCBD2	0.084886	-0.0127301	0.0917993	0.0944431	0.0405102	0.11377	-0.018034	0.018034	0.118769	0.815349	0.0915022	0.0825034	0.457226	0.0362788	0.740764	0.740764	turquoise
SLC39A13	0.0744581	-0.0356952	0.0513332	0.0148282	-0.0403853	0.0504233	0.450155	-0.450155	0.171389	0.512468	0.346052	0.785605	0.458616	0.35468	2.56075e-18	2.56075e-18	yellow
NUDT1	-0.014181	0.0275609	0.0338243	-0.0563602	0.00410364	0.0683786	-0.124083	0.124083	0.794749	0.613088	0.534831	0.300813	0.939994	0.209187	0.0223122	0.0223122	blue
ISY1	0.018164	0.0392668	0.0792961	-0.00962463	-0.0588264	0.0261905	-0.0700138	0.0700138	0.738964	0.471164	0.145144	0.859856	0.280123	0.630858	0.198475	0.198475	blue
TPM4	0.0209085	0.099749	0.145589	0.0198938	0.0499166	-0.00263991	0.248467	-0.248467	0.701286	0.0665994	0.00725298	0.715136	0.359542	0.961376	3.64461e-06	3.64461e-06	yellow
MPZL2	-0.0378572	0.0457326	-0.0708775	-0.0218339	-0.0308326	-0.0148977	-0.227746	0.227746	0.487243	0.40127	0.192981	0.688739	0.57158	0.784624	2.30053e-05	2.30053e-05	pink
SPATA18	-0.00281946	0.0464555	-0.0615893	-0.0200669	0.0155248	-0.0615836	-0.00512948	0.00512948	0.958752	0.39386	0.258112	0.712767	0.775795	0.258156	0.925033	0.925033	grey
ECSIT	-0.0282209	-0.0397972	-0.0295943	-0.118637	-0.0500269	-0.0504952	-0.0728277	0.0728277	0.604608	0.465191	0.587133	0.028963	0.35848	0.353992	0.180986	0.180986	grey
SDE2	-0.0184836	0.0104637	0.17613	0.00785708	0.0362164	0.0808231	-0.0902182	0.0902182	0.734541	0.847781	0.00112826	0.885396	0.506326	0.137532	0.0972485	0.0972485	turquoise
MCTP2	0.0816401	0.0776579	0.0113697	0.0858275	-0.0084727	0.0507611	-0.108003	0.108003	0.133587	0.153664	0.834783	0.11472	0.876486	0.351461	0.0469215	0.0469215	turquoise
COPZ2	-0.0550471	-0.153911	0.127812	0.0221736	-0.0132619	-0.020891	0.643709	-0.643709	0.312233	0.00450749	0.0185601	0.684153	0.807783	0.701523	4.70939e-41	4.70939e-41	brown
LY6G6C	-0.0781296	0.0143138	-0.0322171	-0.0617559	0.00774751	0.027687	-0.0856537	0.0856537	0.151173	0.792871	0.554425	0.256824	0.886984	0.611463	0.11546	0.11546	lightcyan
NEURL4	0.000530375	0.0889087	0.0699104	0.0493833	0.0021561	0.0851509	-0.0211131	0.0211131	0.992237	0.102222	0.19914	0.364704	0.968451	0.117619	0.698504	0.698504	turquoise
AURKAIP1	-0.0867027	0.00520968	-0.0961625	-0.051358	0.00084256	-0.00648348	-0.128471	0.128471	0.111055	0.923865	0.0770444	0.345819	0.987668	0.905328	0.0179579	0.0179579	grey
FAM160A2	0.0330414	0.161449	0.128125	0.112537	0.0374999	0.158595	-0.185146	0.185146	0.544331	0.00287131	0.0182719	0.0383626	0.491366	0.00341368	0.00061259	0.00061259	turquoise
GRHL1	0.0371479	0.024049	-0.147335	-0.0584281	-0.0269166	-0.0909258	-0.141492	0.141492	0.495445	0.659055	0.00657676	0.283398	0.621415	0.0946422	0.00909	0.00909	pink
CDC6	0.0276364	0.0176152	-0.00289004	0.0496371	0.0690367	0.086865	-0.1156	0.1156	0.612115	0.746576	0.95772	0.362241	0.204827	0.110385	0.033362	0.033362	grey
NRBP1	0.0250503	0.00312771	0.0127354	-0.00485387	0.00627472	-0.00357666	0.0411848	-0.0411848	0.645808	0.954247	0.815274	0.92905	0.908362	0.947688	0.449762	0.449762	turquoise
WDR19	0.0178248	0.0041558	0.124758	0.0343079	-0.0429189	0.0540814	0.0938853	-0.0938853	0.743666	0.939233	0.0215876	0.529004	0.430892	0.320811	0.0843401	0.0843401	turquoise
SIK1	-0.00571906	0.00796618	0.0249126	0.0523591	0.00449461	0.0921018	0.0430457	-0.0430457	0.916446	0.883816	0.647623	0.336485	0.934289	0.0904342	0.429532	0.429532	grey
MSMB	0.0430566	-0.132888	-0.0637996	-0.0138984	-0.0167353	-0.0247632	-0.121351	0.121351	0.429414	0.0143428	0.241385	0.798751	0.758834	0.649595	0.0254617	0.0254617	grey
ALDH3A2	0.00233671	0.0425783	-0.0612182	-0.0491588	-0.0603361	-0.0714731	-0.201379	0.201379	0.965809	0.434562	0.260997	0.366891	0.267944	0.189258	0.000189665	0.000189665	turquoise
SFTPD	0.0642824	0.00974769	-0.0598559	0.0325358	-0.0295926	-0.0110775	0.0781157	-0.0781157	0.237836	0.858083	0.271777	0.550512	0.587155	0.83897	0.151246	0.151246	grey
B3GNT6	0.024736	0.0450799	0.0218633	0.0892273	-0.0484134	0.0427963	0.0492901	-0.0492901	0.649955	0.408031	0.688342	0.100994	0.374211	0.432212	0.365611	0.365611	grey
VTI1A	0.0739187	0.00722079	0.0314964	-0.0443833	0.00763062	0.0586176	-0.138006	0.138006	0.174521	0.894621	0.563324	0.415321	0.888678	0.281836	0.0109667	0.0109667	turquoise
PLA1A	0.0646359	-0.0555171	0.132445	-0.00658442	0.0197279	0.0418437	0.110843	-0.110843	0.235259	0.308114	0.0146744	0.903861	0.717409	0.442538	0.0413918	0.0413918	grey
ZSCAN21	-0.000637877	-0.0163595	-0.015183	0.00210772	-0.0251296	-0.0106283	0.00693537	-0.00693537	0.990664	0.764087	0.780604	0.969158	0.644764	0.845417	0.898764	0.898764	royalblue
CD33	-0.0642486	-0.00578702	0.0581236	0.00216687	-0.00777435	0.02658	0.0421923	-0.0421923	0.238083	0.915457	0.285919	0.968293	0.886595	0.625784	0.438743	0.438743	red
EXOSC9	-0.0912074	0.121198	0.0407777	0.0206252	-0.0030953	0.0189123	-0.20924	0.20924	0.0936208	0.0256495	0.454258	0.705143	0.95472	0.728623	0.000103881	0.000103881	blue
THYN1	-0.0167508	-0.103864	0.132487	-0.0139868	-0.0243112	0.0136056	0.0821754	-0.0821754	0.758618	0.0560767	0.0146424	0.797499	0.655577	0.802903	0.13105	0.13105	grey
GEMIN5	-0.0911384	-0.0172951	0.11983	0.142803	0.0839714	0.157097	-0.0809836	0.0809836	0.0938701	0.751028	0.0273759	0.00846159	0.122808	0.00373402	0.13675	0.13675	blue
ZNF266	0.0672956	0.062152	0.104506	-0.0212026	-0.00819121	0.0235519	-0.12722	0.12722	0.216508	0.25378	0.0545665	0.697289	0.880558	0.665672	0.0191163	0.0191163	turquoise
MGAM2	0.149079	0.109664	-0.0179643	-0.041203	0.0773082	-0.0156318	-0.20385	0.20385	0.00595803	0.0436164	0.74173	0.449561	0.155531	0.774292	0.000157347	0.000157347	grey
DZIP1L	0.0831404	-0.009107	0.122919	0.115929	0.0159475	0.0906314	0.0291878	-0.0291878	0.12657	0.867321	0.0236107	0.0328596	0.76986	0.0957199	0.592281	0.592281	grey
SLC25A42	-0.0266162	-0.093359	0.0799738	0.00153826	0.0383134	0.0427006	0.104956	-0.104956	0.625314	0.0861028	0.141727	0.977488	0.482008	0.433242	0.0535274	0.0535274	green
SCML4	0.00202656	-0.0243742	0.144413	0.0556982	0.03566	0.0983286	0.0774388	-0.0774388	0.970345	0.654742	0.00774281	0.306535	0.512884	0.070588	0.154832	0.154832	green
COL16A1	0.0834399	-0.0603275	0.0358797	0.0171612	-0.0564196	0.0100804	0.440992	-0.440992	0.125204	0.268011	0.510289	0.752893	0.300303	0.853292	1.45425e-17	1.45425e-17	yellow
NOD2	0.0627805	0.096645	-0.0372685	-0.0490198	0.0346096	-0.0120318	0.0139916	-0.0139916	0.249001	0.0755663	0.494045	0.368249	0.525385	0.825311	0.797431	0.797431	pink
SHLD1	0.0124055	0.0514087	-0.0374272	-0.111567	-0.0423225	-0.0965848	-0.0679857	0.0679857	0.819977	0.345342	0.492207	0.040074	0.43733	0.0757493	0.211822	0.211822	grey
RPS8	-0.0754768	-0.0189083	0.0582378	0.0226028	-0.0915723	0.0440699	0.00510188	-0.00510188	0.165588	0.728678	0.284971	0.678378	0.0923101	0.418625	0.925435	0.925435	grey
ARRDC1	-0.0165824	0.175749	-0.00837912	-0.0890193	-0.0197398	-0.003741	-0.150889	0.150889	0.760969	0.00115707	0.877839	0.101794	0.717246	0.945288	0.00537167	0.00537167	grey
KIAA1109	0.0618271	0.0345489	0.146158	0.081618	0.0290556	0.103401	-0.00339636	0.00339636	0.256275	0.526112	0.00702598	0.133692	0.593959	0.0571859	0.950322	0.950322	turquoise
ADAM22	-0.0619994	-0.0104704	0.0436522	0.0453872	-0.0397301	0.0505458	0.142557	-0.142557	0.25495	0.847684	0.423054	0.404839	0.465944	0.35351	0.0085763	0.0085763	cyan
VPS33A	-0.00311574	-0.0763026	0.129352	-0.00564877	-0.0288282	0.086896	-0.101236	0.101236	0.954422	0.160995	0.0171795	0.91747	0.596852	0.110257	0.0626241	0.0626241	blue
ATP5F1A	-0.060291	0.124408	0.127025	0.0374241	-0.0355446	0.0229513	-0.279869	0.279869	0.268302	0.0219607	0.0193035	0.492242	0.51425	0.673702	1.61489e-07	1.61489e-07	blue
CCDC89	0.0301585	-0.151796	0.0590434	0.00667588	-0.0279723	-0.041821	0.246107	-0.246107	0.580023	0.00509789	0.278349	0.902532	0.607795	0.442786	4.53342e-06	4.53342e-06	black
DICER1	0.0191533	0.0481402	0.124949	0.115608	-0.0241773	0.116143	-0.111061	0.111061	0.725304	0.376915	0.0213874	0.0333505	0.657352	0.0325355	0.040991	0.040991	turquoise
RNF215	-0.00148454	0.0340605	0.049218	-0.00500259	0.0237371	0.0356641	0.182546	-0.182546	0.978274	0.531981	0.366313	0.926883	0.663205	0.512836	0.000732733	0.000732733	turquoise
SH3BGR	-0.0721897	-0.139921	0.0746606	0.0163066	-0.013113	-0.0361464	0.254092	-0.254092	0.184848	0.00989721	0.170224	0.764828	0.8099	0.507149	2.14721e-06	2.14721e-06	brown
RPS15A	-0.0338757	-0.0296374	0.135147	0.0967005	-0.04358	0.116062	-0.0375785	0.0375785	0.53421	0.586588	0.0127543	0.0753976	0.423821	0.0326581	0.490457	0.490457	grey
CHD8	0.0394346	0.0142479	0.108381	0.0914631	0.0374228	0.158082	-0.0564	0.0564	0.46927	0.793803	0.0461502	0.0927007	0.492258	0.00352038	0.300471	0.300471	turquoise
CCDC24	0.040267	0.00635195	-0.161338	0.0216955	0.00248092	-0.0253297	-0.127458	0.127458	0.459933	0.90724	0.00289089	0.69061	0.963701	0.642131	0.0188914	0.0188914	grey
IFI44	0.0128089	0.101248	0.1637	0.0511602	0.0166186	0.0440824	0.0361976	-0.0361976	0.814228	0.0625924	0.00250013	0.347682	0.760464	0.418493	0.506546	0.506546	grey
GADD45GIP1	-0.058988	0.055759	-0.00988577	-0.0723592	-0.0151384	0.00367258	0.0457563	-0.0457563	0.278801	0.306007	0.856094	0.183816	0.781231	0.946287	0.401025	0.401025	grey
CLIC6	-0.00930758	-0.0731854	-0.0962463	-0.0317008	-0.00356937	-0.0113958	-0.051784	0.051784	0.864427	0.178847	0.076786	0.560793	0.947795	0.834409	0.341827	0.341827	grey
CAMK1G	0.0263133	-0.0464138	0.0482718	0.0298889	0.0251552	-0.0149238	0.268467	-0.268467	0.629256	0.394286	0.375611	0.583415	0.644427	0.784256	5.24427e-07	5.24427e-07	magenta
CETN3	-0.0832246	0.0712159	0.0944007	0.0354218	-0.0545518	0.0134918	0.0281163	-0.0281163	0.126185	0.190859	0.082642	0.515705	0.316614	0.804518	0.605948	0.605948	grey
LOXL3	0.0567206	0.0183756	0.0755363	-0.000124855	-0.00336927	-0.0102576	0.304384	-0.304384	0.297728	0.736034	0.165254	0.998173	0.950717	0.850743	1.0659e-08	1.0659e-08	yellow
FAM229A	0.075095	0.0360567	0.073211	0.0671288	0.018606	0.000835523	-0.02575	0.02575	0.167744	0.508204	0.178695	0.217651	0.73285	0.987772	0.636616	0.636616	turquoise
PNMT	0.0872598	-0.0396751	0.0101907	-0.00129859	0.0185102	0.0566837	-0.0578719	0.0578719	0.108769	0.466561	0.851705	0.980995	0.734173	0.298043	0.288013	0.288013	grey
TUSC2	-0.0543854	0.00673556	-0.0833196	-0.0887013	-0.0413144	-0.0478981	-0.0714759	0.0714759	0.318094	0.901665	0.125751	0.103028	0.448336	0.379322	0.189241	0.189241	blue
TPP1	0.0785173	0.00611595	0.221238	0.107935	0.0301107	0.136751	0.174392	-0.174392	0.149149	0.910671	3.96677e-05	0.0470592	0.580623	0.0117218	0.00126515	0.00126515	magenta
PIP4P1	0.0167738	0.156125	0.0348399	-0.0644419	0.0664182	0.0784058	-0.0431318	0.0431318	0.758296	0.00395605	0.522631	0.236671	0.222571	0.149729	0.428608	0.428608	blue
WDR45	-0.0131807	0.0874463	0.00464576	-0.103813	-0.0250558	-0.0122187	0.0671448	-0.0671448	0.808939	0.108013	0.932085	0.0561965	0.645735	0.822643	0.217541	0.217541	grey
CXCL14	0.0236997	-0.0445317	-0.0626782	0.0672547	-0.0868289	-0.0178748	-0.122077	0.122077	0.663702	0.413761	0.249775	0.216788	0.110534	0.742972	0.0245902	0.0245902	grey
MBD6	0.0314782	0.0693151	0.0319118	0.0559079	-0.0489458	0.0640353	-0.0104332	0.0104332	0.563549	0.203002	0.558187	0.304715	0.368973	0.239648	0.848219	0.848219	grey
EMC9	-0.0291648	0.0403865	-0.0496907	-0.0124762	-0.0152544	0.0706156	-0.0711863	0.0711863	0.592573	0.458603	0.361723	0.818968	0.779598	0.194635	0.191044	0.191044	blue
ENTPD4	-0.0221123	0.0792698	-0.0085826	0.0124858	-0.0665042	-0.0179445	-0.0876681	0.0876681	0.68498	0.145278	0.874897	0.818832	0.221972	0.742006	0.107118	0.107118	turquoise
CCT5	-0.0542381	0.111246	0.0300349	-0.000955997	-0.0156106	0.0359232	-0.225734	0.225734	0.319409	0.0406537	0.581577	0.986008	0.77459	0.509776	2.72715e-05	2.72715e-05	blue
PCDHGB7	-0.0179991	-0.130157	0.105984	0.0145512	0.0437126	-0.0272345	0.493956	-0.493956	0.741248	0.0164942	0.0512167	0.789515	0.422412	0.6173	2.96383e-22	2.96383e-22	yellow
SPNS2	0.0550533	0.0202289	-0.112921	-0.162269	-0.0562451	-0.103473	-0.0179702	0.0179702	0.312179	0.710552	0.0377023	0.0027307	0.301803	0.0570116	0.741649	0.741649	grey
CLECL1	-0.0700622	-0.0948207	0.0708201	0.0571241	-0.00158155	0.0495886	0.129184	-0.129184	0.198165	0.0812784	0.193343	0.294299	0.976855	0.362711	0.0173258	0.0173258	green
BBX	-0.0118074	-0.0277054	0.218849	0.0980574	0.0365174	0.122621	0.133288	-0.133288	0.828519	0.611225	4.82562e-05	0.0713714	0.502796	0.0239533	0.0140495	0.0140495	turquoise
NME2	-0.0606979	-0.00881172	0.142944	0.00345207	0.0503164	0.105889	-0.013281	0.013281	0.265079	0.871586	0.00839634	0.949508	0.355702	0.0514272	0.807512	0.807512	grey
SCAF11	0.0167649	0.0356528	0.160126	0.111001	0.00173244	0.169191	-0.0955537	0.0955537	0.75842	0.512969	0.00311212	0.0411016	0.974648	0.00177086	0.0789427	0.0789427	turquoise
FANCG	-0.0690401	0.0755382	-0.0372648	-0.0772514	0.0812428	0.0694321	-0.180219	0.180219	0.204805	0.165243	0.494088	0.155836	0.135494	0.202239	0.000858328	0.000858328	skyblue
UGGT2	0.0692457	0.101158	0.11811	0.116274	0.0137189	0.0880856	-0.0663177	0.0663177	0.203456	0.0628282	0.0296891	0.0323396	0.801296	0.105451	0.223274	0.223274	turquoise
GSC	-0.0595803	-0.0341201	-0.047926	0.0532738	0.054044	0.119872	0.0169432	-0.0169432	0.273995	0.531263	0.379045	0.328101	0.321147	0.0273213	0.755933	0.755933	grey
CCDC47	0.0302444	0.0658795	-0.0140015	0.00494398	-0.0102146	-0.0290618	-0.297925	0.297925	0.578943	0.226354	0.797291	0.927737	0.851362	0.593881	2.23659e-08	2.23659e-08	blue
CCL8	-0.029482	0.0809169	0.0650812	-0.0154021	-0.0200052	-0.0423844	0.0934659	-0.0934659	0.588553	0.137075	0.232043	0.77752	0.713611	0.43666	0.0857425	0.0857425	magenta
RELCH	-0.0493558	0.126607	0.0898438	0.038758	0.012565	0.0405649	-0.302263	0.302263	0.364972	0.0197079	0.0986506	0.476934	0.817703	0.456619	1.36229e-08	1.36229e-08	turquoise
KCNIP2	-0.0570096	0.00542043	0.0589078	0.122483	-0.00406999	0.0730624	0.109461	-0.109461	0.295269	0.920795	0.279456	0.0241132	0.940485	0.179581	0.0440088	0.0440088	grey
INPP5E	-0.017465	0.0555202	0.0677724	-0.018633	0.0168435	0.0885101	0.0101417	-0.0101417	0.748664	0.308086	0.213262	0.732477	0.757323	0.103776	0.852411	0.852411	blue
CAPRIN1	-0.00982971	0.0872232	0.140965	0.0314266	-0.0127706	0.0679924	-0.163992	0.163992	0.856901	0.108918	0.00935394	0.564189	0.814774	0.211777	0.00245533	0.00245533	turquoise
CD8B2	0.0361718	0.0621097	-0.0574805	-0.0833449	0.0235796	-0.06381	-0.0476927	0.0476927	0.50685	0.254104	0.291292	0.125636	0.665303	0.241309	0.381372	0.381372	grey
KLHDC9	-0.10489	-0.0719402	-0.0351488	-0.0803153	0.0411661	-0.0295525	0.0219113	-0.0219113	0.0536773	0.186375	0.518948	0.140029	0.449968	0.587662	0.687693	0.687693	grey
IFT74	0.0528281	-0.0230648	0.0914614	0.0117769	-0.0632843	0.0149417	-0.00757098	0.00757098	0.332169	0.672182	0.0927069	0.828954	0.245215	0.784003	0.889542	0.889542	turquoise
ERVK3-1	0.0684159	0.14574	0.0833123	0.06054	0.0182647	0.0599797	-0.0958065	0.0958065	0.208938	0.00719212	0.125784	0.266326	0.737568	0.270785	0.07815	0.07815	turquoise
COX5B	-0.0869027	0.0868566	-0.0941697	-0.0790012	-0.0699414	-0.0710651	-0.173831	0.173831	0.11023	0.11042	0.0833995	0.146651	0.198941	0.191802	0.00131241	0.00131241	grey
ZFP82	-0.0556046	-0.0847241	0.0788499	0.0758528	0.0654485	0.0290975	0.201644	-0.201644	0.307351	0.119477	0.147428	0.163484	0.229413	0.593428	0.000185934	0.000185934	brown
PLXNC1	0.0084871	-0.00236305	0.235642	0.120199	0.0399172	0.0758581	0.326411	-0.326411	0.876278	0.965424	1.16256e-05	0.0269011	0.463845	0.163455	7.40782e-10	7.40782e-10	magenta
NUP133	0.00771097	-0.0150927	0.108458	0.0420164	0.0137449	0.0773303	-0.154773	0.154773	0.887513	0.781876	0.0459947	0.440655	0.800927	0.155412	0.00428514	0.00428514	turquoise
RFC5	-0.0260041	0.0408871	0.0306962	-0.018504	0.0174781	0.0723251	-0.155547	0.155547	0.633292	0.453047	0.573283	0.734259	0.748482	0.184023	0.00409396	0.00409396	blue
SNRPD2	-0.118544	0.0187966	0.0245465	0.0147637	-0.000988553	0.0779817	-0.0384083	0.0384083	0.0290906	0.730218	0.65246	0.786515	0.985532	0.151951	0.480922	0.480922	grey
LCAT	0.0841293	0.0535647	0.0104385	0.0447907	0.160317	-0.00791733	0.220083	-0.220083	0.122104	0.325462	0.848143	0.411048	0.00307623	0.884524	4.36186e-05	4.36186e-05	brown
GALNT12	0.11147	-0.0243205	0.0359436	0.0318249	0.0369587	-0.0199401	-0.0899684	0.0899684	0.0402484	0.655452	0.509536	0.559259	0.497645	0.714502	0.0981821	0.0981821	grey
SART1	-0.00224089	0.0773277	0.0708459	-0.00660469	0.0637317	0.0853768	0.0292318	-0.0292318	0.967211	0.155426	0.19318	0.903566	0.241888	0.116645	0.591722	0.591722	blue
FDX2	0.00614638	-0.0459674	-0.0165651	-0.101156	0.0189075	-0.0178397	0.0512239	-0.0512239	0.910229	0.398855	0.761212	0.0628333	0.728689	0.743459	0.347081	0.347081	grey
HNRNPA2B1	-0.001946	0.0813151	0.106422	0.0205534	0.0279265	0.105839	-0.29774	0.29774	0.971524	0.135146	0.0502589	0.706122	0.608384	0.0515383	2.2839e-08	2.2839e-08	blue
ASB8	0.0219798	-0.0944699	0.10442	0.0241362	0.000333344	0.0922022	0.0326135	-0.0326135	0.686768	0.0824159	0.0547647	0.657898	0.995121	0.0900823	0.54956	0.54956	turquoise
TNFRSF10C	-0.0361558	-0.0321641	-0.0481991	-0.00329342	0.0299105	-0.0725175	0.0994711	-0.0994711	0.507038	0.555077	0.376332	0.951825	0.583143	0.182856	0.0673649	0.0673649	grey
CENPF	0.0117092	0.0156559	0.0755005	0.0278615	-0.00657234	0.10177	-0.234796	0.234796	0.829924	0.773952	0.165455	0.609218	0.904036	0.0612432	1.25213e-05	1.25213e-05	blue
SEPTIN1	-0.0941861	-0.042744	0.0603366	0.02208	-0.00961566	0.0536813	0.0952711	-0.0952711	0.0833455	0.432775	0.267939	0.685416	0.859985	0.324409	0.0798366	0.0798366	red
RPS14	-0.0641141	-0.0231195	0.0572163	0.0323895	-0.0507734	0.0955173	-0.0124093	0.0124093	0.239069	0.67145	0.293519	0.552307	0.351344	0.0790573	0.819923	0.819923	grey
NFIX	0.0360551	-0.130124	-0.0100031	-0.0682331	0.0107199	-0.066497	0.279646	-0.279646	0.508223	0.0165211	0.854406	0.21016	0.8441	0.222022	1.65333e-07	1.65333e-07	brown
DMTN	-0.00363146	-0.0468054	-0.0290277	-0.0564522	-0.051822	-0.0184762	-0.0713955	0.0713955	0.946888	0.390304	0.594315	0.300023	0.341473	0.734644	0.18974	0.18974	black
BAG1	0.00714394	0.0976139	-0.0746471	-0.0403887	-0.0316695	0.0521983	-0.210133	0.210133	0.895736	0.0726675	0.170301	0.458578	0.56118	0.337973	9.68805e-05	9.68805e-05	skyblue
TJAP1	0.0554156	0.126657	-0.025819	-0.031135	-0.0126295	-0.0126991	-0.0501867	0.0501867	0.309	0.019659	0.635712	0.567812	0.816784	0.815791	0.356945	0.356945	grey60
RETN	0.0680384	0.0670396	0.0857793	-0.0293293	-0.00548818	-0.0654825	0.237302	-0.237302	0.211467	0.218265	0.114925	0.590487	0.919808	0.22917	1.00407e-05	1.00407e-05	darkorange
SEMA4B	-0.0286635	0.0966142	-0.0158902	-0.00260247	0.066292	0.0623336	-0.110075	0.110075	0.598951	0.0756598	0.770664	0.961924	0.223454	0.252393	0.0428298	0.0428298	grey
TMEM170B	-0.0134158	-0.0991001	0.0772073	0.0368583	-0.0287801	-0.0406118	0.143295	-0.143295	0.805597	0.068398	0.156073	0.498815	0.597464	0.456097	0.00823581	0.00823581	brown
NAA30	-0.0220434	-0.00921574	0.111734	0.0567665	-0.0366868	0.13352	-0.115249	0.115249	0.685909	0.865752	0.0397738	0.297337	0.500816	0.0138818	0.0339052	0.0339052	turquoise
ENKD1	0.0665528	0.103154	0.0679971	-0.00872981	0.00197924	-0.000608227	-0.0172091	0.0172091	0.221633	0.057787	0.211745	0.872769	0.971037	0.991098	0.752225	0.752225	grey
CHRDL2	-0.00897311	-0.0491058	0.13226	0.0515289	0.0711944	-0.0378406	0.412276	-0.412276	0.869255	0.367409	0.0148145	0.344214	0.190993	0.487435	2.4198e-15	2.4198e-15	brown
GABPA	-0.00788918	-0.0322875	0.186146	0.0829491	0.0332564	0.081353	0.0216716	-0.0216716	0.884931	0.553559	0.000571477	0.127448	0.541714	0.134963	0.690932	0.690932	turquoise
ADCY4	0.0630071	0.00204221	0.142654	0.0966792	0.118243	0.0463715	0.344912	-0.344912	0.247293	0.970117	0.00853083	0.0754624	0.0295047	0.394717	6.64465e-11	6.64465e-11	yellow
NFYB	-0.0233349	-0.105017	0.238452	0.103069	-0.00789846	0.111744	0.22867	-0.22867	0.668569	0.053388	9.06556e-06	0.0579935	0.884797	0.0397567	2.1265e-05	2.1265e-05	turquoise
PCDHGB5	0.0207002	-0.0298466	0.0201737	0.00443717	0.0468754	0.00857244	0.131674	-0.131674	0.70412	0.583949	0.711306	0.935127	0.389595	0.875044	0.0152661	0.0152661	grey
CLASP2	-0.0108673	-0.016504	0.122167	0.0523137	-0.0200221	0.0521443	0.0165423	-0.0165423	0.841985	0.762066	0.0244829	0.336905	0.71338	0.338475	0.76153	0.76153	turquoise
MRGPRF	-0.0183937	-0.160842	0.107002	0.0289318	0.0167792	-0.0377488	0.427373	-0.427373	0.735784	0.00297963	0.0490117	0.595533	0.75822	0.488493	1.74737e-16	1.74737e-16	brown
FXR2	-0.0298902	0.0638596	-0.0128828	-0.0331865	0.0153742	0.00735182	0.0462675	-0.0462675	0.583399	0.240943	0.813176	0.542565	0.777913	0.89272	0.395779	0.395779	blue
LPCAT4	0.0363548	0.0779985	0.0155604	0.0259658	-0.0532458	0.0694793	-0.271969	0.271969	0.504701	0.151862	0.775294	0.633792	0.328356	0.201932	3.67322e-07	3.67322e-07	grey
ULK3	0.133965	0.0870105	-0.154654	-0.134231	-0.00318189	-0.0984789	-0.167441	0.167441	0.0135648	0.109787	0.00431524	0.0133788	0.953455	0.0701571	0.00197883	0.00197883	turquoise
ICE2	0.0575647	0.0310258	0.137488	0.0519514	0.026425	0.0940043	-0.102631	0.102631	0.290584	0.569172	0.0112731	0.340267	0.627802	0.0839453	0.0590742	0.0590742	turquoise
DACT3	-0.0497934	-0.161022	0.117466	0.0165382	-0.00081725	-0.0123194	0.442687	-0.442687	0.360731	0.00294706	0.0305973	0.761588	0.988039	0.821205	1.05875e-17	1.05875e-17	brown
HEPACAM2	0.08645	-0.0574533	-0.0662141	0.0609755	0.0145182	-0.115588	0.0796316	-0.0796316	0.112103	0.291521	0.223999	0.262895	0.789981	0.0333806	0.143445	0.143445	grey
ALKBH3	-0.0251497	0.0485272	0.0403342	-0.0323498	0.0880197	-0.0215027	-0.00383925	0.00383925	0.644499	0.373088	0.459185	0.552795	0.105712	0.69322	0.943854	0.943854	grey
CALHM6	-0.0213117	0.0373324	0.155152	0.0260934	-0.0486488	0.0362874	0.00331847	-0.00331847	0.695809	0.493304	0.00419033	0.632126	0.37189	0.505492	0.95146	0.95146	tan
GID8	0.0189644	0.0547187	0.0517364	0.0423912	-0.0327244	0.0571273	-0.177752	0.177752	0.727906	0.315133	0.342272	0.436586	0.548202	0.294272	0.00101305	0.00101305	darkgrey
JUP	0.0717655	0.0523353	-0.011957	0.0339755	0.0265572	0.0939771	-0.137929	0.137929	0.187449	0.336706	0.826381	0.533006	0.626082	0.0840356	0.0110116	0.0110116	grey
UAP1	-0.0655459	0.0634286	0.0207039	0.0458113	0.0209292	-0.0941173	-0.221572	0.221572	0.228719	0.244139	0.70407	0.400459	0.701004	0.0835722	3.85868e-05	3.85868e-05	turquoise
AP5B1	-0.0184041	0.0426326	0.0632003	-0.0247768	-0.0329358	0.0571756	-0.00913369	0.00913369	0.73564	0.433976	0.245844	0.649416	0.54562	0.293863	0.866936	0.866936	turquoise
DCTPP1	-0.0303318	0.0771827	-0.0791363	-0.028347	0.0637991	-0.0431681	-0.155495	0.155495	0.577847	0.156205	0.145959	0.602994	0.241389	0.428219	0.00410633	0.00410633	blue
PURB	0.0829071	-0.0236322	0.11371	0.0628619	0.0245195	0.0511761	-0.0617075	0.0617075	0.127642	0.664601	0.0363777	0.248386	0.652818	0.347532	0.257198	0.257198	turquoise
POLA2	-0.0646505	0.0702725	-0.0323588	-0.0380612	0.0178565	0.0381527	-0.212285	0.212285	0.235154	0.196818	0.552684	0.484898	0.743225	0.483849	8.17742e-05	8.17742e-05	blue
RNF220	0.04273	0.0811298	-0.0433835	-0.0821448	-0.046175	-0.00782751	-0.0846981	0.0846981	0.432925	0.136041	0.425916	0.131193	0.396725	0.885825	0.11959	0.11959	blue
CDKN1A	0.0117238	-0.00295675	0.00496148	0.0248062	0.00663881	0.0453752	0.112947	-0.112947	0.829714	0.956745	0.927482	0.649028	0.903071	0.404964	0.0376585	0.0376585	grey
VAMP8	-0.0363907	0.0619235	-0.0607714	-0.062034	-0.0751561	-0.0217043	-0.158809	0.158809	0.504281	0.255533	0.2645	0.254684	0.167398	0.690491	0.00336991	0.00336991	brown
KCNJ3	-0.040297	0.0413214	-0.0919817	-0.0561743	0.00715629	-0.0981025	-0.101769	0.101769	0.4596	0.448259	0.0908573	0.302413	0.895557	0.0712407	0.0612472	0.0612472	black
NRDC	-0.034108	0.0936849	0.0704909	0.0805365	0.0268653	0.0798061	-0.130678	0.130678	0.531409	0.0850077	0.195426	0.138937	0.62208	0.142567	0.0160629	0.0160629	turquoise
COPS7A	0.0777621	-0.0317221	0.0127832	-0.0363844	-0.0416955	-0.00331605	0.131552	-0.131552	0.153111	0.56053	0.814593	0.504354	0.444156	0.951495	0.0153621	0.0153621	grey
ACAD9	0.0586741	0.0213593	0.0416377	0.0559887	0.0380315	0.0861677	-0.0961954	0.0961954	0.281372	0.695163	0.444789	0.304016	0.485239	0.113284	0.0769427	0.0769427	turquoise
NDUFS8	-0.0880009	0.0524009	-0.0509187	-0.0670228	-0.0257368	0.0289474	0.086635	-0.086635	0.105787	0.3361	0.349965	0.21838	0.63679	0.595335	0.111335	0.111335	grey
TBC1D19	-0.0096024	-0.107018	0.0698824	0.0293942	0.0162449	-0.0328688	0.369602	-0.369602	0.860176	0.0489765	0.199321	0.589665	0.765692	0.546437	2.05853e-12	2.05853e-12	brown
ARHGEF28	0.15051	-0.017244	-0.0455767	0.0524965	-0.0460049	0.0202607	-0.0231356	0.0231356	0.00548993	0.75174	0.402879	0.335218	0.398469	0.710117	0.671234	0.671234	turquoise
RPL3	-0.0394026	0.00330624	0.0413241	-0.0116574	-0.0353464	0.0320272	-0.00300064	0.00300064	0.469631	0.951638	0.448229	0.830665	0.516601	0.556763	0.956104	0.956104	grey
C12orf76	0.0172507	-0.0303363	0.0880248	1.9016e-05	-0.0130221	0.0255896	0.0773953	-0.0773953	0.751646	0.577791	0.105692	0.999722	0.811193	0.638719	0.155064	0.155064	turquoise
MZB1	-0.0182269	0.0499857	0.0831705	0.0916973	0.0221402	0.14613	0.0610799	-0.0610799	0.738092	0.358876	0.126432	0.0918647	0.684604	0.00703708	0.262078	0.262078	green
SLC2A4	-0.0356237	-0.127764	0.067252	0.022907	0.00907138	-0.0196958	0.269885	-0.269885	0.513314	0.0186048	0.216806	0.674295	0.867836	0.71785	4.54298e-07	4.54298e-07	brown
ATP13A1	0.0640993	0.134633	0.0362442	0.00650016	0.0295827	0.0726522	-0.17799	0.17799	0.239178	0.0131009	0.506	0.905085	0.58728	0.182043	0.000997029	0.000997029	blue
KIAA1211	0.028088	-0.026254	0.027144	-0.00542498	0.0741674	0.0504117	-0.050715	0.050715	0.606311	0.63003	0.61847	0.920728	0.173072	0.354791	0.351899	0.351899	turquoise
PRMT7	0.0641508	0.0788902	0.0427203	0.0205558	0.0610323	0.033666	-0.110436	0.110436	0.2388	0.147221	0.433031	0.706089	0.26245	0.536745	0.0421486	0.0421486	blue
RPP25	-0.00578583	0.00664039	-0.0449007	-0.108815	0.00553596	0.00463555	-0.0941459	0.0941459	0.915475	0.903048	0.409899	0.0452797	0.919112	0.932234	0.0834778	0.0834778	grey
TMSB4Y	0.325284	-0.0993469	-0.0574417	-0.0162704	0.0339564	-0.0606027	-0.0755261	0.0755261	8.53562e-10	0.0677094	0.291618	0.765334	0.533236	0.26583	0.165311	0.165311	black
CORO6	-0.0713392	-0.108109	0.0606323	0.00611008	0.0153773	0.0188032	0.246751	-0.246751	0.19009	0.0467028	0.265596	0.910757	0.777869	0.730129	4.27221e-06	4.27221e-06	brown
RAB40B	0.0223222	0.0715492	-0.03863	-0.0622282	0.0217506	-0.0851288	-0.147466	0.147466	0.682152	0.188786	0.478392	0.253197	0.689864	0.117715	0.00652827	0.00652827	grey
TMEM216	0.0312129	0.045288	-0.029294	0.00499752	0.0469456	0.0543214	-0.0442803	0.0442803	0.566843	0.405868	0.590935	0.926956	0.388884	0.318665	0.416405	0.416405	blue
PAFAH1B3	-0.107303	0.0757615	-0.0714811	-0.0888088	-0.0239407	-0.0293365	-0.148623	0.148623	0.0483744	0.163993	0.189208	0.10261	0.660494	0.590396	0.0061147	0.0061147	blue
FUBP3	-0.067696	0.0424901	0.0956701	0.0208089	0.00949194	0.0673512	-0.0347229	0.0347229	0.21378	0.435515	0.078577	0.70264	0.861768	0.216128	0.524029	0.524029	turquoise
MAL	0.0526668	-0.0247884	-0.183865	-0.0721247	-0.0241489	-0.0860356	-0.0927087	0.0927087	0.33365	0.649263	0.00066928	0.185245	0.657729	0.11384	0.0883223	0.0883223	pink
ANGPTL4	-0.0779579	0.00736153	-0.0753566	0.0373234	0.0292278	-0.0263175	0.168914	-0.168914	0.152076	0.892579	0.166264	0.493409	0.591774	0.629202	0.00180239	0.00180239	lightgreen
DRG2	-0.00902506	0.0486904	0.0128905	-0.0107204	0.0145281	-0.00920938	0.0314456	-0.0314456	0.868504	0.37148	0.813067	0.844093	0.789841	0.865844	0.563954	0.563954	blue
PLXNA4	0.00553732	-0.061649	0.0979811	0.0141705	-0.044368	-0.00932308	0.419221	-0.419221	0.919092	0.25765	0.0715931	0.794897	0.415481	0.864204	7.34234e-16	7.34234e-16	brown
SLC25A46	0.0154267	0.0459865	0.127555	0.0713201	-0.00431779	0.0866127	-0.0603483	0.0603483	0.777174	0.398658	0.0188005	0.190209	0.936869	0.111427	0.267846	0.267846	turquoise
MCOLN3	-0.0465029	0.0473945	-0.0419002	-0.0128784	-0.0838099	-0.00702629	-0.0136643	0.0136643	0.393377	0.38436	0.441922	0.813238	0.123533	0.897444	0.802069	0.802069	grey
INCENP	-0.0535075	0.0984292	0.00578844	-0.0375468	-0.00854108	0.0586824	-0.197298	0.197298	0.32598	0.0702993	0.915436	0.490823	0.875497	0.281304	0.000256972	0.000256972	blue
PDLIM5	-0.0149641	-0.0284238	0.154511	0.0882672	0.056883	0.0837702	0.203501	-0.203501	0.783689	0.602011	0.00435144	0.104731	0.296344	0.123711	0.000161582	0.000161582	brown
CHST2	-0.0401128	0.000195035	0.0399491	0.0367637	-0.0124993	0.0838504	0.0316757	-0.0316757	0.461656	0.997145	0.463488	0.499918	0.818639	0.12335	0.561104	0.561104	red
ZNF506	0.0496444	0.0260921	0.14101	0.0353184	0.0142286	0.0427231	0.0284985	-0.0284985	0.362171	0.632143	0.00933123	0.516932	0.794076	0.433	0.601057	0.601057	turquoise
ZNF517	0.0113785	-0.0068805	0.00563797	-0.0132913	0.0335514	0.0153529	0.0248788	-0.0248788	0.834656	0.89956	0.917627	0.807366	0.538133	0.778212	0.64807	0.64807	turquoise
FKBP4	-0.16362	0.0428682	0.00929472	-0.0326094	-0.0640076	0.0440313	-0.0650836	0.0650836	0.00251259	0.431437	0.864613	0.54961	0.239852	0.419033	0.232025	0.232025	lightyellow
KLRB1	-0.0165677	-0.110615	0.115655	0.00164709	-0.0356849	0.0121823	0.141751	-0.141751	0.761176	0.0418136	0.0332772	0.975896	0.51259	0.823163	0.00896259	0.00896259	green
KBTBD6	-0.0276264	0.0140379	0.129584	0.0692096	0.0108508	0.0863678	-0.0766427	0.0766427	0.612243	0.796775	0.0169794	0.203692	0.842221	0.112446	0.15913	0.15913	blue
RAF1	-0.0210525	0.0121089	0.037977	0.0179728	-0.00272122	0.0278882	-0.0606501	0.0606501	0.699327	0.824211	0.485866	0.741612	0.960188	0.608875	0.265456	0.265456	turquoise
CDNF	0.0433271	-0.0506535	0.0306962	0.027614	0.105466	0.0547204	-0.0817582	0.0817582	0.426518	0.352484	0.573283	0.612403	0.0523704	0.315118	0.133024	0.133024	grey
RBIS	-0.0771919	0.0591913	-0.00830028	-0.0546036	-0.0285529	0.00314954	-0.108315	0.108315	0.156155	0.277145	0.87898	0.316153	0.600362	0.953928	0.0462849	0.0462849	grey
KCNRG	0.0145943	0.151439	0.0443088	-0.00829351	-0.0242576	-0.0154604	-0.114625	0.114625	0.788907	0.00520425	0.416105	0.879078	0.656286	0.7767	0.0348902	0.0348902	grey
KCNJ14	0.0551845	-0.0303385	0.0528011	0.014022	0.0283121	0.0453814	-0.113416	0.113416	0.311025	0.577762	0.332417	0.797	0.60344	0.404899	0.036867	0.036867	grey
TICAM1	-0.0395129	0.137682	-0.119946	-0.132547	-0.0058819	-0.0871789	-0.0493181	0.0493181	0.468387	0.0111573	0.0272265	0.0145973	0.914076	0.109099	0.365338	0.365338	grey
MTRR	-0.0350155	0.0552846	0.0533738	-0.017809	0.0178774	0.0515781	-0.0845196	0.0845196	0.520536	0.310147	0.327192	0.743884	0.742935	0.343753	0.120374	0.120374	turquoise
TTC21A	0.0621206	-0.000921678	0.0313918	0.0836265	0.0647575	0.0471875	0.127717	-0.127717	0.25402	0.986511	0.564621	0.124359	0.234378	0.386443	0.018649	0.018649	green
GLYR1	0.0327532	-0.0675068	0.06752	0.0828057	0.0551307	0.0853432	0.0643048	-0.0643048	0.54785	0.215066	0.214976	0.12811	0.311498	0.116789	0.237672	0.237672	turquoise
GOLGB1	0.0860394	0.0803966	0.140628	0.0800583	-0.012787	0.122406	-0.108461	0.108461	0.113824	0.139626	0.00952615	0.141305	0.814539	0.0242029	0.0459887	0.0459887	turquoise
HES2	0.0472512	-0.00864179	-0.0434174	-0.0434827	0.00205558	0.00680337	-0.0219769	0.0219769	0.3858	0.874041	0.425554	0.424858	0.969921	0.90068	0.686806	0.686806	pink
FNBP1	-0.0481687	-0.181303	0.0912326	0.0946498	0.0132048	0.0552246	0.311445	-0.311445	0.376633	0.000797545	0.0935298	0.081831	0.808595	0.310673	4.64261e-09	4.64261e-09	brown
EMILIN2	-0.0115145	0.0418813	0.0525313	0.0470612	0.00625545	0.0179508	0.0511442	-0.0511442	0.832709	0.442128	0.334897	0.387716	0.908643	0.741918	0.347833	0.347833	red
CAPN12	-0.0185641	0.0702779	-0.0768664	-0.0228343	0.0273973	-0.0728687	-0.0851872	0.0851872	0.733429	0.196783	0.157914	0.675271	0.615198	0.18074	0.117462	0.117462	grey
AAR2	0.0452654	-0.0100927	0.0216813	0.0199406	-0.0151205	0.0554503	0.0238472	-0.0238472	0.406102	0.853115	0.690801	0.714496	0.781485	0.308696	0.661738	0.661738	darkgreen
ZFX	-0.352074	0.00216213	0.163638	0.0361051	-0.00431441	0.136538	0.0525838	-0.0525838	2.50133e-11	0.968363	0.00250978	0.507634	0.936918	0.0118549	0.334413	0.334413	turquoise
FABP3	-0.0749911	-0.0734156	0.0439171	-0.00628264	0.0536286	0.0292277	0.0847197	-0.0847197	0.168335	0.177481	0.420241	0.908247	0.324885	0.591775	0.119496	0.119496	grey
SRPRB	0.00735765	0.0723674	0.0533859	0.0523327	-0.0930142	0.0713834	-0.207459	0.207459	0.892636	0.183767	0.327083	0.33673	0.0872739	0.189815	0.000119304	0.000119304	turquoise
DHX30	-0.0449666	-0.00107989	0.0587023	-0.015098	0.0144601	0.0685461	-0.102032	0.102032	0.409211	0.984195	0.28114	0.781801	0.790803	0.208071	0.0605778	0.0605778	turquoise
TUT4	-0.0674796	-0.0283807	0.0703001	0.0745757	0.0261886	0.0573807	0.0586294	-0.0586294	0.215251	0.602563	0.196642	0.170712	0.630883	0.292132	0.281739	0.281739	turquoise
LILRB1	0.0129128	-0.0264985	0.19202	0.109447	0.0303403	0.0887894	0.244864	-0.244864	0.812749	0.626845	0.000377194	0.0440365	0.57774	0.102685	5.08126e-06	5.08126e-06	magenta
ACTN4	-0.00896117	-0.0156277	-0.0013508	0.0183131	0.0614077	0.0786158	0.0508798	-0.0508798	0.869427	0.774348	0.980231	0.736899	0.259521	0.148638	0.350334	0.350334	grey
CTXN1	-0.0774636	-0.0244438	0.0179991	-0.0437908	0.0026577	0.00511202	0.228977	-0.228977	0.154699	0.653818	0.741248	0.42158	0.961116	0.925288	2.07163e-05	2.07163e-05	grey
FGD2	0.0329292	-0.0464369	0.113436	0.0834601	0.0428323	0.0749925	0.207851	-0.207851	0.5457	0.39405	0.0368333	0.125112	0.431824	0.168327	0.000115737	0.000115737	green
MVK	0.0925066	0.0194885	-0.121975	-0.0990778	-0.000787401	-0.0355191	-0.199432	0.199432	0.0890212	0.720695	0.0247106	0.0684607	0.988476	0.514551	0.000219405	0.000219405	blue
DOCK2	-0.0439403	-0.00819309	0.138468	0.0788662	0.0317142	0.0949976	0.117824	-0.117824	0.419996	0.880531	0.0106999	0.147345	0.560627	0.0807096	0.0300886	0.0300886	green
TBC1D8	0.0997706	0.144281	0.0248999	-0.031514	0.0640239	0.0256235	-0.0492166	0.0492166	0.0665403	0.00779987	0.647791	0.563106	0.239732	0.638274	0.366327	0.366327	turquoise
COX10	-0.0376529	0.0386791	0.00782665	-0.0435587	-0.00554867	-0.0100716	-0.195797	0.195797	0.489598	0.477833	0.885837	0.424048	0.918927	0.853419	0.000286903	0.000286903	blue
ZNF284	-0.0759186	-0.103296	0.0930283	-0.0529253	-0.00792734	0.0433804	-0.022393	0.022393	0.163118	0.0574418	0.0872258	0.33128	0.884379	0.425949	0.681199	0.681199	darkred
PEBP1	-0.0525955	-0.0343156	0.00550944	-0.0493175	-0.0305865	-0.0496595	-0.136865	0.136865	0.334306	0.528911	0.919498	0.365344	0.574656	0.362025	0.0116514	0.0116514	grey
MAMDC2	-0.0174216	-0.148877	0.0732222	0.0334644	0.0567985	-0.0795556	0.318216	-0.318216	0.749268	0.00602685	0.178628	0.539188	0.297064	0.143829	2.04928e-09	2.04928e-09	brown
EPHX2	0.00978325	0.0027904	-0.108568	-0.053427	-0.0853813	-0.0905429	-0.207567	0.207567	0.857571	0.959177	0.045774	0.32671	0.116625	0.0960456	0.000118304	0.000118304	grey
PRR19	-0.00208217	0.0025408	-0.05501	-0.0266959	0.0164002	0.0947016	-0.0757547	0.0757547	0.969532	0.962825	0.31256	0.624278	0.763518	0.0816634	0.164031	0.164031	grey
MFSD13A	-0.0441051	0.0503772	0.00386515	-0.0809506	0.0356513	0.004156	-0.0343695	0.0343695	0.418253	0.35512	0.943475	0.13691	0.512987	0.93923	0.528263	0.528263	cyan
GFRA1	-0.0458503	-0.13004	0.0535759	0.0440511	0.0255677	-0.0433571	0.235528	-0.235528	0.400057	0.0165921	0.325362	0.418824	0.639006	0.426198	1.17427e-05	1.17427e-05	brown
COA7	-0.0777686	0.075413	0.0998321	-0.0265235	0.00346417	0.0900565	-0.24853	0.24853	0.153077	0.165947	0.0663719	0.62652	0.949331	0.0978522	3.62323e-06	3.62323e-06	blue
SPIRE2	0.0140342	0.141929	-0.0172284	-0.0391183	0.0245859	-0.0602882	-0.293453	0.293453	0.796827	0.00887613	0.751956	0.472844	0.651938	0.268324	3.69698e-08	3.69698e-08	grey
FASTKD3	-0.0244896	0.104623	0.0411866	0.00904452	-0.0322329	0.0662493	-0.238598	0.238598	0.653213	0.0542942	0.449742	0.868223	0.554231	0.223752	8.9483e-06	8.9483e-06	blue
C4orf36	0.0527983	-0.0786448	0.108117	0.119017	0.0493061	0.0643356	0.0517666	-0.0517666	0.332443	0.148487	0.0466875	0.0284492	0.365455	0.237447	0.34199	0.34199	grey
STX18	-0.0128544	0.070754	-0.0335361	-0.0980547	-0.0544902	-0.0697701	-0.202249	0.202249	0.81358	0.19376	0.538319	0.071379	0.317161	0.200046	0.000177638	0.000177638	blue
GPR19	0.0751929	0.0285895	-0.0354939	-0.0649764	0.0493556	-0.0656125	-0.0981262	0.0981262	0.16719	0.599895	0.514851	0.232797	0.364974	0.228245	0.0711719	0.0711719	grey
H2AFY	0.0432679	0.111585	-0.0268961	-0.00939719	-0.0628177	0.0603817	-0.188162	0.188162	0.427152	0.0400416	0.621681	0.863135	0.24872	0.267581	0.0004962	0.0004962	blue
ZNF774	0.0462045	0.0220961	-0.0165988	-0.00129191	0.028101	0.0646363	-0.107096	0.107096	0.396424	0.685199	0.760741	0.981093	0.606144	0.235256	0.0488111	0.0488111	grey
ZNF354C	-0.000731839	-0.154539	0.134687	0.0904948	0.0965312	0.0454194	0.284492	-0.284492	0.989289	0.00434446	0.0130641	0.0962233	0.0759128	0.404506	9.86314e-08	9.86314e-08	brown
TFG	0.0143743	0.0714045	0.00895376	0.0319268	0.0277417	0.0661752	-0.179988	0.179988	0.792015	0.189684	0.869534	0.558002	0.61076	0.224272	0.000871851	0.000871851	turquoise
NAP1L2	-0.0636451	-0.187812	0.115534	0.0482568	0.0473535	0.032372	0.318648	-0.318648	0.24253	0.000508569	0.0334633	0.375759	0.384771	0.552521	1.94362e-09	1.94362e-09	brown
SLC1A7	-0.00721974	-0.00140432	0.037308	0.149236	-0.0119734	0.00782173	0.0616589	-0.0616589	0.894636	0.979448	0.493588	0.00590503	0.826146	0.885908	0.257573	0.257573	grey
MT-CO3	0.0412114	-0.026031	-0.0540593	-0.088627	0.0138214	-0.0691835	-0.0449222	0.0449222	0.449469	0.63294	0.321009	0.103318	0.799842	0.203864	0.409675	0.409675	turquoise
CSTF1	-0.00225277	0.00780827	-0.062265	-0.00979011	-0.00799058	0.043316	-0.187911	0.187911	0.967037	0.886103	0.252916	0.857472	0.883463	0.426637	0.000505065	0.000505065	grey
TGFB1I1	-0.0266016	-0.151439	0.0995433	0.0243404	0.024887	-0.0169888	0.504396	-0.504396	0.625504	0.00520419	0.0671653	0.65519	0.647961	0.755295	2.79954e-23	2.79954e-23	brown
ABI3BP	-0.0348126	-0.138447	0.112625	0.0214141	0.0171827	-0.0347741	0.349101	-0.349101	0.522957	0.0107116	0.0382107	0.694419	0.752594	0.523417	3.7636e-11	3.7636e-11	brown
IL1RN	0.0136906	-0.038736	-0.15918	-0.0622607	-0.0360206	-0.0537201	-0.0985851	0.0985851	0.801697	0.477185	0.00329538	0.252949	0.508629	0.324059	0.0698536	0.0698536	pink
HDDC3	0.0346293	0.0368646	-0.116229	-0.0216254	0.0554571	0.0524391	-0.134813	0.134813	0.525149	0.49874	0.0324063	0.691559	0.308638	0.335747	0.0129788	0.0129788	grey
HECTD4	0.0865023	-0.0963388	0.0601323	0.00611119	-0.000506752	0.0541003	0.0065315	-0.0065315	0.111885	0.0765014	0.269566	0.910741	0.992583	0.320641	0.90463	0.90463	turquoise
SYT7	0.126141	-0.00277906	-0.0694466	-0.0870387	-0.00851821	0.00152998	0.0403957	-0.0403957	0.0201679	0.959342	0.202145	0.109672	0.875828	0.97761	0.4585	0.4585	greenyellow
RUBCNL	-0.00883752	-0.0145376	-0.0219234	-0.0267082	0.0157057	-0.00657427	0.114932	-0.114932	0.871213	0.789707	0.687529	0.62412	0.773253	0.904008	0.034403	0.034403	grey
PSMD1	-0.0173411	0.0450611	0.115989	0.0587182	0.00537426	0.105984	-0.200878	0.200878	0.750388	0.408227	0.0327688	0.281009	0.921467	0.0512167	0.000196933	0.000196933	blue
CDK12	0.0749828	0.0351385	0.0531392	-0.038906	0.0401765	0.0337957	-0.00218756	0.00218756	0.168382	0.519071	0.329326	0.475252	0.460944	0.535177	0.967991	0.967991	grey
NAPRT	-0.0354688	0.140855	-0.115213	-0.0271379	-0.0483577	-0.0334841	-0.145551	0.145551	0.515148	0.00940969	0.0339611	0.618549	0.374761	0.538949	0.00726854	0.00726854	grey
EPDR1	-0.0421251	-0.0444406	0.0665339	-0.0770373	0.00431466	-0.0464843	0.235718	-0.235718	0.439472	0.414718	0.221765	0.156989	0.936915	0.393567	1.15477e-05	1.15477e-05	grey
PARP14	0.0139784	0.156554	0.169416	0.0609415	0.0330676	0.131406	-0.0794858	0.0794858	0.797617	0.00385665	0.00174553	0.263163	0.544013	0.0154773	0.144182	0.144182	tan
PRKAR1B	0.0306616	0.00433816	0.00354238	-0.0151418	0.00651332	0.059427	-0.0717259	0.0717259	0.573716	0.936572	0.948189	0.781184	0.904894	0.275233	0.187694	0.187694	blue
MBNL1	-0.0403093	-0.118753	0.269341	0.120205	0.00977996	0.104085	0.21595	-0.21595	0.459462	0.0288048	4.80061e-07	0.0268938	0.857618	0.0555511	6.10323e-05	6.10323e-05	brown
MANBAL	0.0398189	0.0268596	-0.0547021	-0.0256379	-0.00490929	0.00707299	0.0384934	-0.0384934	0.464947	0.622154	0.31528	0.638085	0.928242	0.896766	0.479951	0.479951	grey
FAM72A	-0.0463042	0.0620523	0.0681457	-0.0406229	0.00380549	0.0376465	-0.190622	0.190622	0.395404	0.254544	0.210746	0.455974	0.944346	0.489672	0.000416863	0.000416863	blue
OSBPL2	0.00350285	0.108112	0.0789523	0.0441307	-0.00305944	0.0516248	-0.170478	0.170478	0.948766	0.0466974	0.146902	0.417982	0.955244	0.343316	0.00163082	0.00163082	darkgrey
MOXD1	-0.0504126	-0.0612353	0.0632074	0.070525	-0.00110803	0.0362024	0.369048	-0.369048	0.354782	0.260863	0.245791	0.19521	0.983784	0.50649	2.23302e-12	2.23302e-12	cyan
VAT1	-0.00491297	-0.024955	0.0553399	-0.0257748	0.0634537	0.00371505	0.242708	-0.242708	0.928189	0.647064	0.309662	0.636291	0.243952	0.945667	6.18441e-06	6.18441e-06	grey
CSF3R	0.048402	0.0840347	0.0400088	0.00569407	-0.0385604	-0.0495982	0.151956	-0.151956	0.374323	0.122525	0.462819	0.91681	0.479186	0.362619	0.00505099	0.00505099	darkorange
AKR7A3	-0.00328629	-0.0832449	-0.156209	-0.0247355	-0.058202	-0.0483434	-0.197039	0.197039	0.95193	0.126092	0.00393638	0.649961	0.285268	0.374902	0.00026192	0.00026192	grey
HSPBP1	-0.0510231	0.0501377	-0.0870382	-0.0406598	-0.0111289	-0.0339501	-0.0769367	0.0769367	0.348977	0.357415	0.109674	0.455565	0.838232	0.533311	0.157533	0.157533	blue
LYRM2	-0.00944269	0.0375757	0.0838501	0.0736452	0.00692474	0.0177299	-0.120803	0.120803	0.862479	0.49049	0.123352	0.176125	0.898918	0.744983	0.0261378	0.0261378	blue
MRPS35	-0.0743183	0.0518252	0.0874793	0.0701775	-0.0349061	0.0800354	-0.179908	0.179908	0.172196	0.341443	0.107879	0.197425	0.52184	0.14142	0.000876555	0.000876555	grey
C3orf80	-0.0637765	-0.0862384	0.0287408	0.0238173	-0.0433097	0.0446424	0.345953	-0.345953	0.241557	0.112988	0.597965	0.662136	0.426704	0.412601	5.77415e-11	5.77415e-11	midnightblue
ADCY6	0.128361	0.0336193	0.0453706	0.069035	0.0767554	0.135108	-0.127149	0.127149	0.0180576	0.537311	0.405011	0.204838	0.158517	0.0127801	0.0191847	0.0191847	turquoise
MECR	-0.0274453	0.0222145	-0.0165728	0.0211953	0.0545677	0.0225134	0.0068604	-0.0068604	0.614577	0.683603	0.761104	0.697388	0.316472	0.67958	0.899852	0.899852	blue
APBA1	-0.0152885	-0.0112285	0.0562772	0.0590142	-0.0123067	-0.0188847	0.210988	-0.210988	0.779119	0.836806	0.301527	0.278587	0.821387	0.729004	9.0588e-05	9.0588e-05	yellow
HIRA	-0.0239009	0.0850392	0.0696635	-0.0409937	0.100653	0.0378712	-0.173683	0.173683	0.661024	0.118103	0.200735	0.451869	0.0641579	0.487083	0.00132522	0.00132522	blue
GLIS2	0.0213534	-0.136287	0.102048	0.0748181	-0.0230169	0.0811529	0.539843	-0.539843	0.695243	0.0120124	0.0605359	0.169322	0.672824	0.135929	4.91993e-27	4.91993e-27	yellow
CGGBP1	-0.0375021	-0.0307753	0.147897	0.0976874	0.0673449	0.079337	0.0881904	-0.0881904	0.49134	0.572295	0.00637115	0.0724513	0.21617	0.144936	0.105035	0.105035	turquoise
HHLA3	0.023109	0.0388645	-0.037338	-0.0299895	0.075884	-0.0733175	0.0783099	-0.0783099	0.67159	0.475724	0.493239	0.582148	0.163311	0.178062	0.150229	0.150229	orange
TEX30	-0.0561448	0.0813279	0.0236899	-0.0407238	0.0182396	0.0350526	-0.139992	0.139992	0.302668	0.135084	0.663833	0.454855	0.737916	0.520093	0.00985926	0.00985926	blue
PTCH2	-0.0150962	-0.163144	0.122097	0.0474952	0.122482	0.0369454	0.293741	-0.293741	0.781827	0.00258756	0.0245664	0.38335	0.0241147	0.4978	3.58014e-08	3.58014e-08	green
CLIC5	0.0301164	0.0915735	0.147961	0.0423074	-0.00862051	0.0992776	-0.0469905	0.0469905	0.580552	0.0923059	0.0063482	0.437494	0.874349	0.0679021	0.38843	0.38843	grey60
SCG3	-0.0789474	0.00264628	-0.064341	0.0241526	-0.0391217	0.00493557	0.042392	-0.042392	0.146927	0.961283	0.237407	0.65768	0.472805	0.927859	0.436577	0.436577	midnightblue
MRM2	-0.0257902	0.0120298	0.0666559	-0.0125917	0.0259717	0.0653134	-0.17347	0.17347	0.63609	0.82534	0.220917	0.817323	0.633715	0.230378	0.00134376	0.00134376	blue
TUBG1	-0.045215	0.0930483	-0.0140125	-0.0990035	0.0568126	-0.00870218	-0.13441	0.13441	0.406626	0.0871577	0.797135	0.0686692	0.296944	0.873168	0.0132542	0.0132542	blue
TMEM44	0.147571	0.0600484	0.01692	0.0136306	0.0196924	-0.0192463	-0.0560868	0.0560868	0.00648955	0.270236	0.756256	0.802548	0.717896	0.724025	0.303168	0.303168	turquoise
YJU2	-0.0947192	0.0682394	-0.0199404	-0.131196	-0.0056968	-0.0494319	0.00931395	-0.00931395	0.0816064	0.210118	0.714498	0.0156446	0.91677	0.364232	0.864335	0.864335	grey
FNTA	-0.0298287	0.0512167	0.0403794	-0.00542892	-0.0556147	-0.00579112	-0.115949	0.115949	0.584175	0.347149	0.458681	0.920671	0.307262	0.915398	0.0328287	0.0328287	blue
U2SURP	-0.0259256	0.0561686	0.122527	0.131077	-0.0122963	0.13553	-0.128983	0.128983	0.634318	0.302462	0.0240618	0.0157395	0.821535	0.0125007	0.0175023	0.0175023	turquoise
TNFSF13	0.0276621	0.0466294	-0.0471094	0.00984151	-0.0862692	-0.0316548	-0.14927	0.14927	0.611783	0.39209	0.38723	0.856731	0.112859	0.561362	0.00589362	0.00589362	grey
LIMK1	0.0109279	0.0334936	0.0170091	-0.0425182	0.0118521	0.054095	0.0750337	-0.0750337	0.841116	0.538834	0.755013	0.435212	0.82788	0.320689	0.168093	0.168093	purple
DCUN1D3	0.0758417	-0.025652	0.107585	0.0243217	0.0134212	0.0355127	0.0849898	-0.0849898	0.163546	0.6379	0.0477846	0.655436	0.80552	0.514628	0.118318	0.118318	turquoise
CD300LB	0.0452207	-0.0985453	0.072703	0.030741	0.0506814	-0.0292494	0.256786	-0.256786	0.406566	0.0699673	0.181737	0.572723	0.352218	0.591499	1.65923e-06	1.65923e-06	red
PSORS1C2	-0.0517857	0.0447627	-0.0137777	-0.0236162	0.0112141	0.00278875	0.0366302	-0.0366302	0.341811	0.411341	0.800462	0.664816	0.837012	0.959201	0.501476	0.501476	grey
RDM1	-0.0172214	0.0558188	-0.0175184	-0.0303488	0.0211209	0.00764943	-0.197187	0.197187	0.752055	0.305488	0.747921	0.577634	0.698397	0.888405	0.000259069	0.000259069	blue
B3GALT6	-0.0126083	-0.0509667	-0.0208565	-0.00150351	0.0183469	0.0440216	-0.00631302	0.00631302	0.817086	0.349511	0.701992	0.977997	0.736432	0.419136	0.907806	0.907806	grey
ZNF613	-0.121791	0.0591561	0.134164	0.07547	0.0357617	0.0572238	-0.0635292	0.0635292	0.0249298	0.277431	0.0134253	0.165626	0.511682	0.293455	0.24339	0.24339	turquoise
CHKB	0.0079007	0.0974069	-0.0252952	0.0679264	-0.00594931	0.0380481	-0.116208	0.116208	0.884764	0.0732791	0.642585	0.212222	0.913095	0.485049	0.0324383	0.0324383	grey
HRAS	-0.0320132	0.124699	-0.0690694	-0.0351919	0.00244427	0.0246626	-0.048949	0.048949	0.556935	0.0216506	0.204612	0.518435	0.964237	0.650924	0.368942	0.368942	blue
IL24	0.061264	0.00928721	-0.0625066	-0.0366889	0.0287386	-0.0555384	0.110419	-0.110419	0.260639	0.864721	0.251076	0.50079	0.597994	0.307928	0.0421798	0.0421798	lightgreen
NTNG2	0.0570225	-0.114482	0.0636892	0.0841946	-0.013811	0.0938135	0.440721	-0.440721	0.295159	0.0351194	0.242202	0.121813	0.79999	0.0845789	1.52956e-17	1.52956e-17	yellow
TRIM23	0.0423237	-0.0949543	0.145453	0.0855689	0.0190169	0.0374356	0.224381	-0.224381	0.437317	0.0808486	0.00730808	0.115821	0.727182	0.492109	3.05506e-05	3.05506e-05	brown
NBEA	-0.0190811	-0.162261	0.125899	0.0789592	-0.00035224	0.0292946	0.291097	-0.291097	0.726298	0.00273196	0.0204104	0.146866	0.994845	0.590927	4.80085e-08	4.80085e-08	brown
CXorf38	-0.157933	0.0891612	0.124816	-0.0245674	0.0501271	0.0778317	-0.142084	0.142084	0.00355189	0.101248	0.0215269	0.652183	0.357516	0.152743	0.00880132	0.00880132	turquoise
PSMA7	-0.038764	0.10242	0.0434713	0.0392519	-0.00845405	0.0733925	-0.160737	0.160737	0.476866	0.0595995	0.42498	0.471332	0.876756	0.177617	0.00299875	0.00299875	darkgrey
ELP6	-0.0494541	0.0668292	-0.0159819	-0.0394862	-0.0387222	-0.0233056	-0.120013	0.120013	0.364016	0.219716	0.769378	0.468688	0.477342	0.668961	0.0271397	0.0271397	blue
MRPL38	-0.0385653	-0.0146238	-0.0725234	-0.0266513	0.0519604	0.0132801	-0.0267307	0.0267307	0.479129	0.788489	0.182821	0.624858	0.340183	0.807525	0.623827	0.623827	blue
PPWD1	0.0560292	0.0560988	0.104983	0.061679	-0.0385612	0.105695	-0.0787367	0.0787367	0.303665	0.303065	0.0534666	0.257418	0.479177	0.0518568	0.148012	0.148012	turquoise
FAIM2	0.0147042	-0.119365	0.100422	0.000232344	0.0601025	0.0838249	0.0517817	-0.0517817	0.787354	0.0279857	0.064774	0.996599	0.269804	0.123465	0.341849	0.341849	grey
CCSER2	-0.0132597	-0.104153	0.156574	0.0498455	0.0134112	0.0542605	0.238101	-0.238101	0.807815	0.0553927	0.00385198	0.360227	0.805663	0.319209	9.35309e-06	9.35309e-06	brown
LTBP1	-0.00571476	-0.155221	0.174263	0.0879398	0.0227375	0.00231508	0.518816	-0.518816	0.916509	0.00417336	0.00127587	0.10603	0.676569	0.966126	9.38466e-25	9.38466e-25	brown
TMEM158	0.069849	0.024682	-0.0413131	-0.048856	-0.0035476	-0.00447635	0.312663	-0.312663	0.199536	0.650668	0.44835	0.369854	0.948113	0.934556	4.01367e-09	4.01367e-09	lightgreen
DCSTAMP	0.0674438	-0.0128842	0.108201	-0.0100928	0.0433258	0.0287859	0.0562118	-0.0562118	0.215495	0.813155	0.0465155	0.853114	0.426532	0.59739	0.302089	0.302089	magenta
BCL9	-0.00187008	-0.0320355	0.0680562	0.0284276	0.0507449	0.0221919	0.0983611	-0.0983611	0.972634	0.556661	0.211348	0.601963	0.351614	0.683908	0.0704948	0.0704948	turquoise
ETF1	-0.0343246	-0.0167765	0.088671	0.0787455	0.0364769	0.0903898	-0.0917894	0.0917894	0.528803	0.758258	0.103146	0.147967	0.50327	0.0966114	0.0915374	0.0915374	turquoise
CRABP2	0.059235	-0.0443223	-0.145015	-0.0352798	0.0347117	-0.0186897	0.0283387	-0.0283387	0.27679	0.415963	0.00748838	0.517391	0.524163	0.731694	0.6031	0.6031	pink
MAML1	0.045426	0.00804214	0.0971166	0.073094	0.0371518	0.126081	0.0485366	-0.0485366	0.404437	0.882716	0.0741438	0.179392	0.4954	0.0202276	0.372995	0.372995	turquoise
TMEM115	-0.00602415	0.0012922	-0.0934698	-0.130582	-0.0547389	-0.0685519	-0.0147389	0.0147389	0.912007	0.981089	0.0857294	0.0161418	0.314955	0.208033	0.786865	0.786865	turquoise
BMP5	0.00681817	-0.0798838	0.017003	0.00907384	-0.00716305	0.0424319	0.0441897	-0.0441897	0.900465	0.142178	0.755098	0.8678	0.895459	0.436145	0.41736	0.41736	greenyellow
ATPAF1	-0.0223278	-0.0139612	0.0162359	0.0145168	0.00476819	0.00767073	-0.110848	0.110848	0.682076	0.797861	0.765817	0.790001	0.9303	0.888096	0.0413821	0.0413821	turquoise
KIAA1755	0.0195286	-0.0903629	0.147418	0.0785478	-0.0204494	0.0655498	0.497121	-0.497121	0.720145	0.096711	0.00654615	0.14899	0.70754	0.228691	1.46202e-22	1.46202e-22	yellow
FCHO2	0.0352687	0.102962	0.168665	0.0844066	-0.0222807	0.0837168	-0.107395	0.107395	0.517523	0.0582559	0.00183112	0.120873	0.682711	0.123951	0.0481807	0.0481807	turquoise
C1QTNF2	-0.0114246	-0.21054	0.131042	0.0368786	-0.00468421	-0.0243309	0.4922	-0.4922	0.833996	9.38347e-05	0.0157675	0.498578	0.931524	0.655316	4.37329e-22	4.37329e-22	yellow
CDC45	-0.059871	0.086152	-0.0263985	-0.0779767	0.0109456	0.0035722	-0.22878	0.22878	0.271656	0.11335	0.628146	0.151977	0.840861	0.947753	2.10677e-05	2.10677e-05	blue
SLC6A20	-0.121775	0.0528536	0.122501	0.0775907	0.0439472	0.131993	-0.166412	0.166412	0.0249492	0.331936	0.0240926	0.154022	0.419923	0.0150191	0.00211129	0.00211129	grey
TASOR2	0.013022	0.0834949	0.169387	0.0602943	0.0192694	0.123477	-0.139242	0.139242	0.811195	0.124954	0.00174876	0.268276	0.723706	0.02298	0.0102652	0.0102652	turquoise
FAM122C	-0.0236179	0.0596964	0.0818711	-0.0098598	-0.00721015	0.018562	0.0194814	-0.0194814	0.664793	0.273059	0.132487	0.856468	0.894775	0.733458	0.720793	0.720793	grey
WDR43	-0.0688896	0.125593	0.114458	0.0817981	0.0414706	0.114147	-0.299818	0.299818	0.205796	0.0207207	0.035158	0.132834	0.44662	0.0356597	1.80323e-08	1.80323e-08	blue
STC2	-0.0199519	0.0183987	0.0843217	0.00209581	0.0842094	0.111702	0.0441168	-0.0441168	0.714341	0.735715	0.121249	0.969332	0.121747	0.0398305	0.418129	0.418129	grey
TMEM173	0.00252619	-0.0160309	0.042614	0.040173	0.0605454	0.0605633	0.36326	-0.36326	0.963039	0.768691	0.434177	0.460983	0.266283	0.266142	5.17208e-12	5.17208e-12	yellow
TMC7	0.0913272	0.0306404	0.136834	0.0941279	0.115707	0.133686	-0.124384	0.124384	0.0931888	0.573982	0.0116705	0.0835372	0.0331975	0.0137625	0.0219868	0.0219868	turquoise
COQ7	0.0390406	0.0229122	0.0911964	0.0170441	-0.0318893	-0.0558451	-0.022846	0.022846	0.473725	0.674226	0.0936606	0.754525	0.558465	0.30526	0.675113	0.675113	turquoise
SLC31A1	0.0347307	0.139638	0.0930252	-0.0263483	-0.0107413	0.0166532	-0.296489	0.296489	0.523936	0.010049	0.0872363	0.6288	0.843794	0.75998	2.63081e-08	2.63081e-08	turquoise
KIAA1549L	-0.13778	0.0184175	0.00290413	-0.0198201	0.0973622	0.068918	0.0368304	-0.0368304	0.0110994	0.735454	0.957514	0.716145	0.0734116	0.205609	0.49914	0.49914	grey
BNIP1	-0.0289245	0.149757	-0.00816575	-0.00034226	0.0240273	0.0396162	-0.147635	0.147635	0.595626	0.00573198	0.880927	0.994991	0.659344	0.467225	0.0064664	0.0064664	blue
RASSF3	0.0129389	-0.0610391	0.186971	0.0901194	0.0230131	0.0800135	0.148378	-0.148378	0.812377	0.262397	0.000539491	0.097617	0.672875	0.141529	0.00619999	0.00619999	white
PGAP2	0.0223955	0.0825504	-0.0561872	-0.106798	-0.00531757	-0.0404835	-0.195635	0.195635	0.681166	0.129294	0.302302	0.0494476	0.922293	0.457523	0.000290307	0.000290307	blue
TIPARP	0.00149413	0.0413703	0.0248019	0.0519073	0.00149908	0.0203037	-0.0917905	0.0917905	0.978134	0.447721	0.649084	0.340678	0.978062	0.709529	0.0915334	0.0915334	turquoise
TMEM263	0.0118909	-0.00345056	0.117505	0.116888	-0.0377572	0.0676046	0.00122653	-0.00122653	0.827325	0.94953	0.0305411	0.0314317	0.488395	0.214401	0.98205	0.98205	turquoise
TNFSF4	-0.0270469	0.0648047	0.156651	0.0106809	0.0170785	0.0312068	0.326423	-0.326423	0.619727	0.234036	0.00383442	0.844661	0.754045	0.566919	7.3966e-10	7.3966e-10	yellow
MISP	-0.0218866	0.0991964	0.0391645	-0.0682905	-0.059269	0.0199569	-0.216988	0.216988	0.688026	0.0681287	0.472322	0.209776	0.276513	0.714271	5.61315e-05	5.61315e-05	grey
ADSL	-0.0524553	0.0263752	0.0758241	0.0238696	0.0470168	0.0392563	-0.0867956	0.0867956	0.335598	0.62845	0.163644	0.66144	0.388164	0.471283	0.110671	0.110671	blue
SENP8	-0.0089965	0.016603	-0.0146803	0.00345694	-0.00474247	-0.0182004	-0.0362963	0.0362963	0.868917	0.760681	0.787692	0.949437	0.930675	0.738459	0.505388	0.505388	turquoise
HIF1AN	0.0554748	-0.0713621	0.0449893	0.0412734	0.00800872	0.103065	-0.0111341	0.0111341	0.308483	0.189947	0.408975	0.448786	0.8832	0.0580046	0.838159	0.838159	turquoise
TMEM234	0.0443124	0.099415	-0.0464746	0.0250008	-0.017184	0.0227562	-0.0255954	0.0255954	0.416067	0.0675204	0.393666	0.64646	0.752575	0.676318	0.638643	0.638643	turquoise
ARHGAP6	-0.0885689	-0.0054105	0.113033	0.0147251	0.00434902	0.0342596	0.21761	-0.21761	0.103545	0.920939	0.0375118	0.78706	0.936413	0.529584	5.3373e-05	5.3373e-05	brown
DNAJB11	0.0104381	0.0913724	0.0214001	0.0563234	0.0333439	0.0155492	-0.143776	0.143776	0.848148	0.0930261	0.694609	0.30113	0.540651	0.775451	0.00802026	0.00802026	turquoise
MAGEE1	-0.0532974	-0.158193	0.0924374	0.011431	0.0597548	0.0157913	0.356654	-0.356654	0.327886	0.00349711	0.0892614	0.833904	0.272589	0.772052	1.3217e-11	1.3217e-11	brown
OR51E1	-0.0573487	0.0762114	0.0666991	-0.0372089	-0.0715469	0.0425656	0.102634	-0.102634	0.292401	0.161497	0.220617	0.494737	0.1888	0.434699	0.0590673	0.0590673	grey
[truncated: 12,710 more rows]
